# Supplementary material for: Electroreductive deuteration of N-propynylamides to enamides
Source: Royal Society of Chemistry journal article supplement (doi:10.1039/d4gc03790a), 2024-01-01

## Supplemental Information

### Electroreductive Deuteration of *N*-Propynylamides to Enamides

Qiansong Gao, Mingchun Wang, Lianyou Zheng, Lingling Shi, Cheng Wu, He Li, and Jinbao Xiang\*

The Center for Combinatorial Chemistry and Drug Discovery of Jilin University, The School of Pharmaceutical Sciences, Jilin University, 1266 Fujin Road, Changchun, Jilin 130021, P. R. China

[\\*Correspondence to: jbxiang@jlu.edu.cn](mailto:jbxiang@jlu.edu.cn)

#### Table of Contents

|                                                                        |    |
|------------------------------------------------------------------------|----|
| <b>I. General Information</b> .....                                    | 2  |
| <b>II. Substrate Synthesis and Characterization</b> .....              | 3  |
| <b>III. Investigation of Reaction Conditions</b> .....                 | 19 |
| <b>IV. Experimental Procedures and Compound Characterization</b> ..... | 27 |
| <b>V. Mechanism Research</b> .....                                     | 48 |
| <b>VI. References</b> .....                                            | 53 |
| <b>VII. Spectra</b> .....                                              | 54 |

## I. General Information

All reactions were performed under air atmosphere, using round bottom flasks. All substrates were obtained from the commercial sources or synthesized following literature procedures. All reagents were commercial and were used without further purification. The electrochemical reaction device follows our previous work.<sup>1</sup> The instrument for electrolysis is Single Output DC Power Supply (KRP-305DM) (made in China). Chromatography was carried on flash silica gel (300-400 mesh). All reactions were monitored by TLC, which was performed on percolated aluminium sheets of silica gel 60 (F254). Melting points were uncorrected. The <sup>1</sup>H and <sup>13</sup>C NMR data were obtained on 300 MHz or 400 MHz NMR spectrometer with TMS as the internal standard and CDCl<sub>3</sub> as solvent. Multiplicities are indicated as it follows: s, singlet; d, doublet; t, triplet; q, quartet; m, multiplet; dd, doubled doublet; br, broad. Coupling constants (*J* values) where noted are quoted in Hertz. High-resolution mass spectra (HRMS) were obtained with a time-of-flight (TOF) mass spectrometer (ESI). LC-MS data were obtained by high-performance liquid chromatography (HPLC, Agilent 1260 Infinity II) equipped with a quadrupole mass spectrometer (Agilent 6125).

### Electrode materials/dimensions:

The aluminium electrodes are purchased from Tianjin Zhongnuotansu Technology Co., Ltd. The dimensions of the electrodes are 5 mm × 100 mm (the submerged height of the electrode is approximately 5 mm).

### List of available substrates from our group's pervious work<sup>2</sup>:

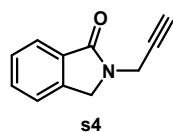

## II. Substrates Synthesis and Characterization

Method A: Synthesis of compounds **2**, **s7-s15**, **s18-s29**.

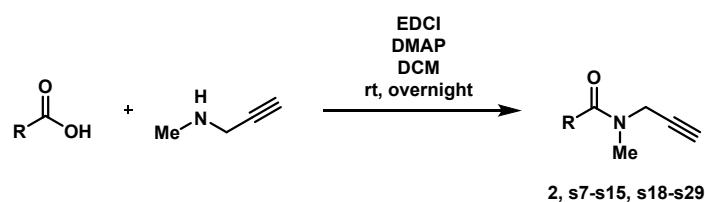

At room temperature, corresponding carboxylic acid (3 mmol, 1.0 eq.) was dissolved in DCM (20 mL) in a 50 mL round bottom flask, then EDCI (4.5 mmol, 1.5 eq.) and DMAP (0.45 mmol, 0.15 eq.) was added. Then *N*-methylpropargylamine (3.6 mmol, 1.2 eq.) was added dropwise to the above solution, and the obtained solution was stirred at room temperature for overnight. After the completion of the reaction, the solution was diluted with DCM (30 mL) and quenched with 1*N* HCl aqueous or water (30 mL). The aqueous layer was extracted with DCM (3 × 30 mL). The combined DCM layers were washed with brine (3 × 30 mL), dried over Na<sub>2</sub>SO<sub>4</sub>, and concentrated *in vacuo*. Purification by flash column chromatography using PE/EtOAc as eluent afforded the desired product **2**, **s7-s15**, **s18-s29**.

Method B: Synthesis of compounds **s5-s6**, **s16-s17** and **s30-s35**.

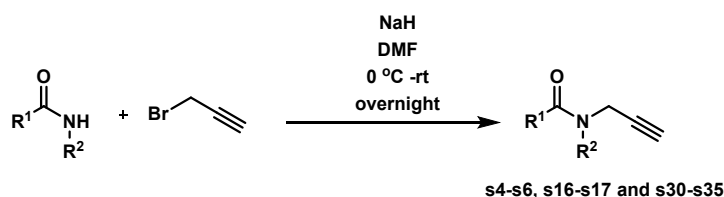

Add sodium hydride (60% dispersion in mineral oil, 3.6 mmol, 1.2 eq.) to a solution of amide substrate (3 mmol, 1.0 eq.) in anhydrous DMF (10 mL) at 0 °C, stir the reaction mixture for 15 minutes. Then 3-bromo-propyne (3.6 mmol, 1.2 eq.) was added dropwise to the above solution, and the obtained solution was stirred at room temperature for overnight. After the completion of the reaction, ice water was added into solution. The solution was diluted with EtOAc (30 mL) and quenched with water (30 mL). The aqueous layer was extracted with EtOAc (3 × 30 mL). The combined EtOAc layers were washed with brine (3 × 30 mL), dried over Na<sub>2</sub>SO<sub>4</sub>, and concentrated *in vacuo*. Purification by flash column chromatography using PE/EtOAc as eluent afforded the desired product **s4-s6**, **s16-s17** and **s30-s35**.

### ***N*,4-Dimethyl-*N*-(prop-2-yn-1-yl)benzamide (**2**)**

The <sup>1</sup>H spectra data matched with values reported in the literature<sup>3</sup>.

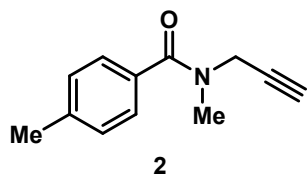

Yellow liquid (505 mg, 90% yield);

<sup>1</sup>H NMR (400 MHz, CDCl<sub>3</sub>): δ 7.38 (s, 1H), 7.21 (d, *J* = 7.6 Hz, 1H), 4.44 – 4.22 (s, 1H), 4.02 (s, 1H), 3.11 (s, 3H), 2.38 (s, 3H), 2.31 (s, 1H).

***N*,1-Dimethyl-*N*-(prop-2-yn-1-yl)-1*H*-pyrrole-2-carboxamide (s4)**

The <sup>1</sup>H spectra data matched with values reported in the literature<sup>4</sup>.

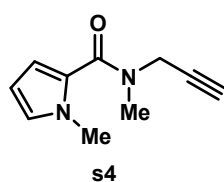

Yellow liquid (425 mg, 80% yield);

<sup>1</sup>H NMR (400 MHz, CDCl<sub>3</sub>): δ 6.71 (s, 1H), 6.57 (s, 1H), 6.09 (s, 1H), 4.33 (s, 2H), 3.80 (s, 3H), 3.20 (s, 3H), 2.31 (s, 1H).

***N*-Methyl-*N*-(prop-2-yn-1-yl)furan-2-carboxamide (s5)**

The <sup>1</sup>H spectra data matched with values reported in the literature<sup>3</sup>.

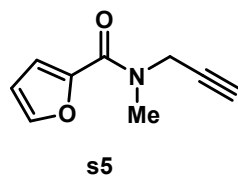

Brown liquid (440 mg, 90% yield);

<sup>1</sup>H NMR (400 MHz, CDCl<sub>3</sub>): δ 7.52 (s, 1H), 7.09 (d, *J* = 3.2 Hz, 1H), 6.49 (q, *J* = 3.2 Hz, 1H), 4.37 (s, 2H), 3.31 (s, 3H), 2.29 (s, 1H).

***N*-Methyl-*N*-(prop-2-yn-1-yl)thiophene-2-carboxamide (s6)**

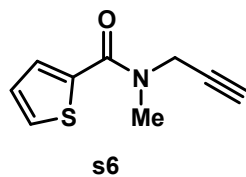

Yellow liquid (483 mg, 90% yield);



**<sup>1</sup>H NMR** (400 MHz, CDCl<sub>3</sub>): δ 7.48 (d, *J* = 4.5 Hz, 2H), 7.06 (t, *J* = 4.5 Hz, 1H), 4.32 (s, 2H), 3.25 (s, 3H), 2.34 (s, 1H).

**<sup>13</sup>C NMR** (101 MHz, CDCl<sub>3</sub>): δ 164.3, 137.3, 129.6, 129.4, 127.0, 78.6, 73.0, 35.4, 8.8.

**HRMS (ESI)**: Calcd. for C<sub>9</sub>H<sub>10</sub>NO<sup>+</sup> [M + H]<sup>+</sup>: 180.0478, found: 180.0483.

***N*-Methyl-4-phenyl-*N*-(prop-2-yn-1-yl)butanamide (s7)**

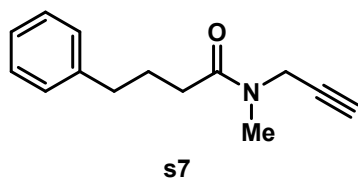

Colourless liquid (613 mg, 95% yield);

**<sup>1</sup>H NMR** (400 MHz, CDCl<sub>3</sub>): δ 7.29 (d, *J* = 7.1 Hz, 2H), 7.19 (d, *J* = 7.1 Hz, 3H), 4.23 (s, 1.37H), 3.98 (s, 0.63H), 3.00 (s, 3H), 2.68 (t, *J* = 7.6 Hz, 2H), 2.39 (t, *J* = 7.5 Hz, 0.64H), 2.32 (t, *J* = 7.5 Hz, 1.36H), 2.27 (s, 0.3H), 2.19 (s, 0.6H), 2.00 (m, 2H).

**<sup>13</sup>C NMR** (101 MHz, CDCl<sub>3</sub>): δ 172.5, 141.8, 128.6, 128.5, 126.0, 79.0, 72.8, 71.7, 39.5, 36.3, 35.3, 34.4, 33.4, 32.5, 32.3, 26.6, 26.4.

**HRMS (ESI)**: Calcd. for C<sub>14</sub>H<sub>18</sub>NO<sup>+</sup> [M + H]<sup>+</sup>: 216.1383, found: 216.1385.

***N*-Methyl-*N*-(prop-2-yn-1-yl)tetrahydro-2*H*-pyran-4-carboxamide (s8)**

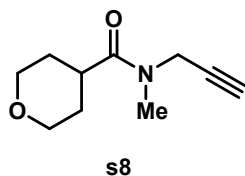

Colourless liquid (490 mg, 90% yield);

**<sup>1</sup>H NMR** (400 MHz, CDCl<sub>3</sub>): δ 4.23 (d, *J* = 2.3 Hz, 1.4H), δ 4.10 (d, *J* = 2.3 Hz, 0.6H), 4.04 (dd, *J* = 4.0, 2.1 Hz, 1H), 4.01 (dd, *J* = 4.0, 2.1 Hz, 1H), 3.45 (t, *J* = 11.0 Hz, 2H), δ 3.13 (s, 2H), δ 3.00 (s, 1H), 2.83 – 2.69 (m, 1H), δ 2.32 (s, 0.3H), δ 2.20 (s, 0.9H), 1.96 – 1.83 (m, 2H), 1.63 (m, 2H).

**<sup>13</sup>C NMR** (101 MHz, CDCl<sub>3</sub>): δ 174.4, 78.9, 73.1, 71.9, 67.3, 39.3, 38.0, 36.5, 34.3, 33.7, 29.2, 28.8.

**HRMS (ESI)**: Calcd. for C<sub>10</sub>H<sub>16</sub>NO<sub>2</sub><sup>+</sup> [M + H]<sup>+</sup>: 182.1176, found: 182.1173.

**Methyl-4-(methyl(prop-2-yn-1-yl)carbamoyl)bicyclo[2.2.2]octane-1-carboxylate (s9)**

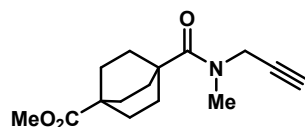

**s9**

White solid (550 mg, 70% yield); m.p. 110 – 111 °C;

**<sup>1</sup>H NMR** (400 MHz, CDCl<sub>3</sub>): δ 4.19 (s, 2H), 3.65 (s, 3H), 3.13 (s, 3H), 2.22 (s, 1H), 1.93 (d, *J* = 8.0 Hz, 6H), 1.84 (d, *J* = 8.0 Hz, 6H).

**<sup>13</sup>C NMR** (101 MHz, CDCl<sub>3</sub>): δ 178.0, 176.1, 79.1, 72.1, 51.9, 39.8, 39.4, 38.7, 36.2, 28.0, 27.7.

**HRMS (ESI)**: Calcd. for C<sub>15</sub>H<sub>22</sub>NO<sub>3</sub><sup>+</sup> [M + H]<sup>+</sup>: 264.1594, found: 264.1600.

**(1R,3R,5S)-N-Methyl-N-(prop-2-yn-1-yl)adamantane-1-carboxamide (s10)**

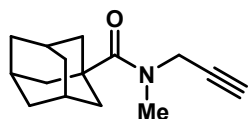

**s10**

White solid (550 mg, 80% yield); m.p. 118 – 120 °C;

**<sup>1</sup>H NMR** (400 MHz, CDCl<sub>3</sub>): δ 4.22 (s, 2H), 3.17 (s, 3H), 2.21 (s, 1H), 2.03 (d, *J* = 10.2 Hz, 9H), 1.72 (s, 6H).

**<sup>13</sup>C NMR** (101 MHz, CDCl<sub>3</sub>): δ 176.8, 79.4, 71.9, 41.9, 39.5, 38.9, 36.7, 36.2, 28.5.

**HRMS (ESI)**: Calcd. for C<sub>15</sub>H<sub>22</sub>NO<sup>+</sup> [M + H]<sup>+</sup>: 232.1696, found: 232.1707.

**N-Methyl-N-(prop-2-yn-1-yl)-2,3-dihydrobenzofuran-2-carboxamide (s11)**

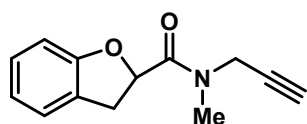

**s11**

Yellow liquid (520 mg, 80% yield);

**<sup>1</sup>H NMR** (400 MHz, CDCl<sub>3</sub>) δ 7.19 (d, *J* = 7.5 Hz, 1H), 7.12 (t, *J* = 7.7 Hz, 1H), 6.88 (t, *J* = 7.7 Hz, 1H), 6.81 (m, 1H), 5.41 (m, 1H), 4.56 (dd, *J* = 17.3, 2.5 Hz, 0.4H), 4.42 (dd, *J* = 17.3, 2.5 Hz, 0.6H), 4.12 (m, 1H), 3.82 (m, 0.4H), 3.76 – 3.68 (m, 0.6H), 3.35 (m, 1H), 3.26 (s, 2H), 3.07 (s, 1H), 2.34 (t, *J* = 2.5 Hz, 0.4H), 2.24 (t, *J* = 2.5 Hz, 0.6H).

**<sup>13</sup>C NMR** (101 MHz, CDCl<sub>3</sub>): δ 168.8, 158.4, 128.2, 128.1, 125.8, 125.0, 121.3, 121.2, 109.6, 79.2, 79.0, 73.1, 72.4, 39.2, 37.2, 34.4, 34.0, 32.3, 32.2.

**HRMS (ESI)**: Calcd. for C<sub>13</sub>H<sub>14</sub>NO<sub>2</sub><sup>+</sup> [M + H]<sup>+</sup>: 216.1019, found: 216.1028.

### 2-(Prop-2-yn-1-yl)-3,4-dihydroisoquinolin-1(2H)-one (s13)

The  $^1\text{H}$  spectra data matched with values reported in the literature<sup>5</sup>.

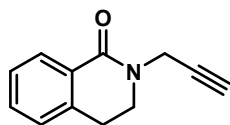

s13

Yellow liquid (477 mg, 86% yield);

$^1\text{H NMR}$  (300 MHz,  $\text{CDCl}_3$ ):  $\delta$  8.09 (dd,  $J = 7.4, 1.5$  Hz, 1H), 7.43 (td,  $J = 7.4, 1.5$  Hz, 1H), 7.37 – 7.30 (m, 1H), 7.18 (dt,  $J = 7.2, 1.0$  Hz, 1H), 4.43 (d,  $J = 2.5$  Hz, 2H), 3.69 (t,  $J = 6.6$  Hz, 2H), 3.05 (t,  $J = 6.6$  Hz, 2H), 2.23 (t,  $J = 2.5$  Hz, 1H).

### 5-(Prop-2-yn-1-yl)phenanthridin-6(5H)-one (s14)

The  $^1\text{H}$  spectra data matched with values reported in the literature<sup>6</sup>.

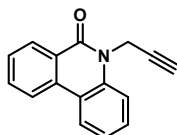

s14

White solid (490 mg, 70% yield); m.p. 159 – 160 °C;

$^1\text{H NMR}$  (300 MHz,  $\text{CDCl}_3$ ):  $\delta$  8.55 (dd,  $J = 7.9, 1.5$  Hz, 1H), 8.34 – 8.23 (m, 2H), 7.77 (m, 1H), 7.65 – 7.53 (m, 3H), 7.36 (m, 1H), 5.22 (d,  $J = 2.5$  Hz, 2H), 2.26 (t,  $J = 2.5$  Hz, 1H).

### 4-Phenyl-1-(prop-2-yn-1-yl)pyrrolidin-2-one (s15)

The  $^1\text{H}$  spectra data matched with values reported in the literature<sup>7</sup>.

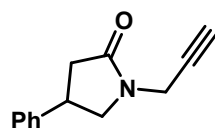

s15

Yellow liquid (360 mg, 60% yield);

$^1\text{H NMR}$  (400 MHz,  $\text{CDCl}_3$ ):  $\delta$  7.35 (t,  $J = 7.6$  Hz, 2H), 7.25 (m, 3H), 4.18 (s, 2H), 3.88 (t,  $J = 8.0$  Hz, 1H), 3.62 (p,  $J = 8.0$  Hz, 1H), 3.55 – 3.49 (m, 1H), 2.86 (m, 1H), 2.58 (m, 1H), 2.25 (s, 1H).

### 1-(Prop-2-yn-1-yl)azacyclotridecan-2-one (s16)

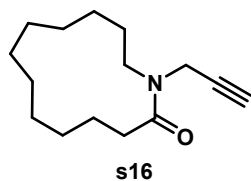

Yellow liquid (420 mg, 60% yield);

**<sup>1</sup>H NMR** (400 MHz, CDCl<sub>3</sub>): δ 4.40 (t, *J* = 12.3 Hz, 0.3H), 4.20 (s, 2H), 3.93 (d, *J* = 18.4 Hz, 0.3H), 3.41 (t, *J* = 8.0 Hz, 2H), 2.79 – 2.64 (m, 0.5H), 2.35 (t, *J* = 8.0 Hz, 2H), 2.26 (s, 0.4H), 2.16 (s, 1H), 1.83 – 1.64 (m, 4H), 1.50 – 1.16 (m, 12H).

**<sup>13</sup>C NMR** (101 MHz, CDCl<sub>3</sub>): δ 173.3, 79.7, 72.5, 71.4, 45.7, 44.7, 37.8, 34.3, 33.4, 32.2, 26.8, 26.6, 26.3, 25.9, 25.8, 25.7, 25.5, 25.4, 25.3, 25.1, 24.9, 24.6, 24.6, 24.3, 23.7, 23.6.

**HRMS (ESI)**: Calcd. for C<sub>15</sub>H<sub>26</sub>NO<sup>+</sup> [M + H]<sup>+</sup>: 236.2009, found: 236.2016.

**2-(Dibenzylamino)-*N*-methyl-*N*-(prop-2-yn-1-yl)acetamide (s17)**

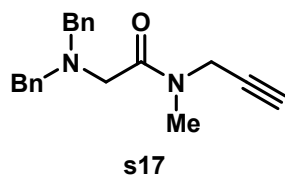

Colourless liquid (620 mg, 40% yield);

**<sup>1</sup>H NMR** (400 MHz, CDCl<sub>3</sub>): δ 7.38 – 7.25 (m, 10H), 4.13 (d, *J* = 9.1 Hz, 2H), 3.70 (s, 2.27H), 3.64 (s, 1.73H), 3.28 (d, *J* = 10.4 Hz, 2H), 2.91 (d, *J* = 4.2 Hz, 3H), 2.16 (d, *J* = 5.6 Hz, 1H).

**<sup>13</sup>C NMR** (101 MHz, CDCl<sub>3</sub>): δ 170.5, 138.9, 138.4, 129.4, 129.4, 128.5, 128.4, 127.4, 127.3, 72.4, 71.8, 58.9, 58.6, 57.1, 55.8, 39.0, 36.4, 34.4.

**HRMS (ESI)**: Calcd. for C<sub>20</sub>H<sub>23</sub>N<sub>2</sub>O<sup>+</sup> [M + H]<sup>+</sup>: 307.1805, found: 307.1818.

**(*R*)-1-Benzyl-*N*-methyl-*N*-(prop-2-yn-1-yl)pyrrolidine-2-carboxamide (s18)**

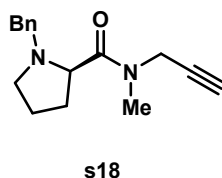

Colourless liquid (610 mg, 80% yield);

**<sup>1</sup>H NMR** (400 MHz, CDCl<sub>3</sub>): δ 7.34 – 7.21 (m, 5H), 4.85 (d, *J* = 18.0 Hz, 0.38H), 4.31 – 4.10 (m, 1H), 4.06 (d, *J* = 18.0 Hz, 0.62H), 3.91 (m, 1H), 3.55 – 3.36 (m, 2H), 3.09 (t, *J* = 7.6 Hz, 0.46H), 3.04 (s, 2H), 2.93 (s, 1H), 2.41 (q, *J* = 7.6 Hz, 0.54H), 2.30 – 2.07 (m, 2H), 2.03 – 1.75 (m, 3H), 1.67 (s, 1H)

$^{13}\text{C}$  NMR (101 MHz,  $\text{CDCl}_3$ ):  $\delta$  172.9, 138.4, 129.3, 129.2, 128.3, 127.2, 127.1, 79.0, 72.7, 71.8, 67.2, 63.8, 58.6, 57.9, 53.1, 52.8, 38.5, 36.7, 34.0, 33.9, 28.5, 22.9, 22.8.

**HRMS (ESI):** Calcd. for  $\text{C}_{16}\text{H}_{21}\text{N}_2\text{O}^+$   $[\text{M} + \text{H}]^+$ : 257.1648, found: 257.1661.

**1-Benzyl-N-methyl-N-(prop-2-yn-1-yl)piperidine-2-carboxamide (s19)**

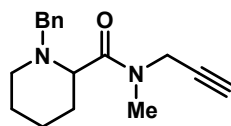

**s19**

Brown liquid (560 mg, 70% yield);

$^1\text{H}$  NMR (400 MHz,  $\text{CDCl}_3$ ):  $\delta$  7.30 (s, 5H), 4.38 (d,  $J = 17.8$  Hz, 0.5H), 4.31 (d,  $J = 17.2$  Hz, 0.5H), 4.17 (d,  $J = 17.2$  Hz, 0.5H), 3.81 (dd,  $J = 13.2, 5.3$  Hz, 1H), 3.34 (d,  $J = 13.2$  Hz, 0.5H), 3.25 (d,  $J = 9.5$  Hz, 2H), 3.21 (d,  $J = 5.3$  Hz, 1H), 2.98 (s, 2H), 2.92 (d,  $J = 11.7$  Hz, 0.5H), 2.30 (s, 0.5H), 2.20 (s, 0.5H), 2.06 (s, 0.5H), 1.85 (s, 2H), 1.76 (s, 2H), 1.54 (s, 2H), 1.31 (s, 1H).

$^{13}\text{C}$  NMR (101 MHz,  $\text{CDCl}_3$ ):  $\delta$  172.8, 172.6, 138.0, 129.5, 129.1, 128.3, 128.2, 127.1, 127.1, 79.1, 78.9, 72.9, 71.8, 60.0, 59.6, 52.1, 51.6, 38.6, 36.9, 34.3, 33.7, 28.1, 27.9, 24.9, 23.9, 23.4.

**HRMS (ESI):** Calcd. for  $\text{C}_{17}\text{H}_{23}\text{N}_2\text{O}^+$   $[\text{M} + \text{H}]^+$ : 271.1805, found: 271.1816.

**1-Benzyl-N-methyl-N-(prop-2-yn-1-yl)piperidine-3-carboxamide (s20)**

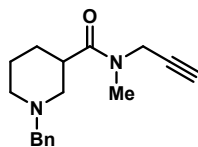

**s20**

Brown liquid (405 mg, 30% yield);

$^1\text{H}$  NMR (400 MHz,  $\text{CDCl}_3$ ):  $\delta$  7.30 (s, 5H), 4.26 – 4.12 (m, 1.4H), 4.05 (s, 0.6H), 3.50 (d,  $J = 13.7$  Hz, 2H), 3.07 (s, 2H), 2.95 (s, 1H), 2.88 (s, 2H), 2.78 (m, 1H), 2.16 (d,  $J = 12.8$  Hz, 2H), 1.97 (d,  $J = 12.5$  Hz, 1H), 1.82 (d,  $J = 12.5$  Hz, 1H), 1.73 (d,  $J = 12.8$  Hz, 1H), 1.64 (s, 2H), 1.48 (d,  $J = 12.8$  Hz, 1H).

$^{13}\text{C}$  NMR (101 MHz,  $\text{CDCl}_3$ ):  $\delta$  174.0, 138.3, 129.3, 128.3, 127.1, 79.0, 72.9, 71.8, 63.5, 56.1, 55.8, 53.9, 53.8, 39.9, 39.4, 36.3, 34.3, 33.5, 27.7, 27.4, 25.1.

**HRMS (ESI):** Calcd. for  $\text{C}_{17}\text{H}_{23}\text{N}_2\text{O}^+$   $[\text{M} + \text{H}]^+$ : 271.1805, found: 271.1816.

**1-Benzyl-N-methyl-N-(prop-2-yn-1-yl)piperidine-4-carboxamide (s21)**

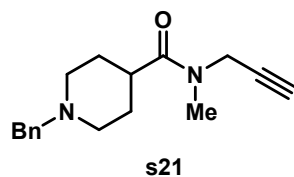

Brown liquid (650 mg, 80% yield);

$^1\text{H NMR}$  (400 MHz,  $\text{CDCl}_3$ ):  $\delta$  7.32 (s, 5H), 4.22 (s, 1.36H), 4.07 (s, 0.64H), 3.52 (s, 2H), 3.10 (s, 2H), 2.99 (s, 1H), 2.95 (d,  $J = 10.8$  Hz, 2H), 2.48 (s, 1H), 2.29 (s, 0.3H), 2.19 (s, 0.6H), 2.01 (s, 2H), 1.88 (m, 2H), 1.70 (s, 2H).

$^{13}\text{C NMR}$  (101 MHz,  $\text{CDCl}_3$ ):  $\delta$  164.6, 138.5, 129.2, 128.3, 127.1, 71.8, 63.3, 53.2, 39.1, 36.4, 34.3, 28.9, 28.5.

**HRMS (ESI)**: Calcd. for  $\text{C}_{17}\text{H}_{23}\text{N}_2\text{O}^+$   $[\text{M} + \text{H}]^+$ : 271.1805, found: 271.1817.

#### ***N*,4-Dimethyl-*N*-(prop-2-yn-1-yl)benzenesulfonamide (s22)**

The  $^1\text{H}$  spectra data matched with values reported in the literature<sup>8</sup>.

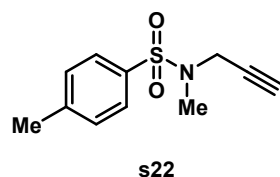

White solid (335 mg, 50% yield); m.p. 89 – 91 °C;

$^1\text{H NMR}$  (400 MHz,  $\text{CDCl}_3$ ):  $\delta$  7.71 (d,  $J = 7.9$  Hz, 2H), 7.31 (d,  $J = 7.9$  Hz, 2H), 4.02 (s, 2H), 2.82 (s, 3H), 2.43 (s, 3H), 2.08 (s, 1H).

#### **5-(2,5-Dimethylphenoxy)-*N*,2,2-trimethyl-*N*-(prop-2-yn-1-yl)pentanamide (s23)**

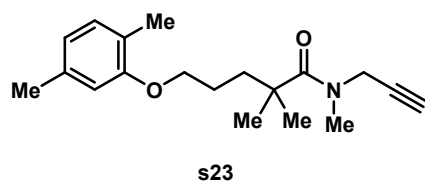

Colourless liquid (700 mg, 78% yield);

$^1\text{H NMR}$  (400 MHz,  $\text{CDCl}_3$ ):  $\delta$  7.00 (d,  $J = 7.5$  Hz, 1H), 6.66 (d,  $J = 7.5$  Hz, 1H), 6.61 (s, 1H), 4.19 (s, 2H), 3.93 (s, 2H), 3.16 (s, 3H), 2.30 (s, 3H), 2.19 (s, 1H), 2.17 (s, 3H), 1.81 (m, 4H), 1.32 (s, 6H).

$^{13}\text{C NMR}$  (101 MHz,  $\text{CDCl}_3$ ):  $\delta$  176.4, 157.0, 136.6, 130.4, 123.5, 120.8, 111.9, 79.2, 71.9, 67.8, 42.5, 39.2, 37.4, 35.7, 27.0, 25.3, 21.5, 16.0.

**HRMS (ESI)**: Calcd. for  $\text{C}_{19}\text{H}_{27}\text{NO}_2\text{Na}^+$   $[\text{M} + \text{Na}]^+$ : 324.1934, found: 324.1930.

#### **2-(4-Isobutylphenyl)-*N*-methyl-*N*-(prop-2-yn-1-yl)propanamide (s24)**

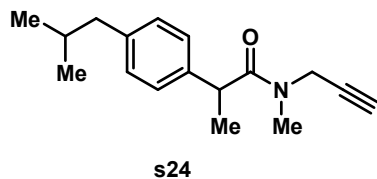

Yellow liquid (690 mg, 89% yield);

**<sup>1</sup>H NMR** (400 MHz, CDCl<sub>3</sub>): δ 7.14 (d, *J* = 7.8 Hz, 2H), 7.08 (d, *J* = 7.8 Hz, 2H), 4.36 (dd, *J* = 17.3, 2.5 Hz, 0.6H), 4.14 (ddd, *J* = 22.3, 17.3, 2.5 Hz, 1H), 3.91 (t, *J* = 6.8 Hz, 0.4H), 3.84 (q, *J* = 6.8 Hz, 0.6H), 3.68 (dd, *J* = 18.3, 2.5 Hz, 0.4H), 3.00 (s, 1H), 2.93 (s, 2H), 2.43 (d, *J* = 7.2 Hz, 2H), 2.19 (dt, *J* = 20.2, 2.5 Hz, 1H), 1.83 (m, 1H), 1.43 (m, 3H), 0.89 (d, *J* = 6.6 Hz, 6H).

**<sup>13</sup>C NMR** (101 MHz, CDCl<sub>3</sub>): δ 174.4, 173.9, 140.5, 140.3, 138.9, 138.7, 129.8, 129.7, 127.1, 79.0, 72.6, 71.8, 45.1, 43.2, 39.2, 36.8, 34.5, 33.9, 30.3, 22.5, 21.0, 20.8.

**HRMS (ESI)**: Calcd. for C<sub>17</sub>H<sub>24</sub>NO<sup>+</sup> [M + H]<sup>+</sup>: 258.1852, found: 258.1863.

**2-(6-Methoxynaphthalen-2-yl)-N-methyl-N-(prop-2-yn-1-yl)propanamide (s25)**

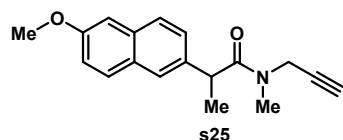

White solid (720 mg, 85% yield); m.p. 131 – 132 °C;

**<sup>1</sup>H NMR** (400 MHz, CDCl<sub>3</sub>): δ 7.70 (t, *J* = 8.6 Hz, 2H), 7.63 – 7.60 (m, 1H), 7.40 – 7.34 (m, 1H), 7.16 – 7.10 (m, 2H), 4.33 (dd, *J* = 17.2, 2.5 Hz, 0.7H), 4.21 (m, 1H), 4.06 (q, *J* = 6.8 Hz, 0.3H), 3.99 (q, *J* = 6.8 Hz, 0.7H), 3.91 (s, 3H), 3.65 (dd, *J* = 17.2, 2.5 Hz, 0.3H), 3.02 (s, 1H), 2.94 (s, 2H), 2.19 (dt, *J* = 25.0, 2.5 Hz, 1H), 1.51 (m, 3H).

**<sup>13</sup>C NMR** (101 MHz, CDCl<sub>3</sub>): δ 173.6, 157.7, 136.7, 133.6, 129.3, 127.7, 126.3, 125.7, 119.2, 105.7, 79.0, 71.8, 55.4, 43.5, 36.9, 34.6, 20.9.

**HRMS (ESI)**: Calcd. for C<sub>18</sub>H<sub>20</sub>NO<sub>2</sub><sup>+</sup> [M + H]<sup>+</sup>: 282.1489, found: 282.1494.

**2-([1,1'-Biphenyl]-4-yl)-N-methyl-N-(prop-2-yn-1-yl)acetamide (s26)**

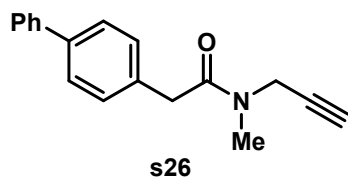

White solid (630 mg, 80% yield); m.p. 112 – 113 °C;

**<sup>1</sup>H NMR** (400 MHz, CDCl<sub>3</sub>): δ 7.60 – 7.52 (t, *J* = 8.6 Hz, 4H), 7.43 (t, *J* = 7.6 Hz, 2H), 7.33 (m, 3H), 4.28 (d, *J* = 2.5 Hz, 1.4H), 4.06 (d, *J* = 2.5 Hz, 0.6H), 3.83 (s, 0.7H), 3.77 (s, 1.3H), 3.10 (s, 2H), 3.04 (s, 1H), 2.31 (t, *J* = 2.5 Hz, 0.3H), 2.22 (t, *J* = 2.5 Hz, 0.6H).

**<sup>13</sup>C NMR** (101 MHz, CDCl<sub>3</sub>): δ 170.8, 140.9, 139.9, 133.7, 129.4, 128.9, 127.5, 127.4, 127.1, 78.7, 73.1, 72.0, 40.6, 40.5, 36.5, 35.0, 33.7.

**HRMS (ESI)**: Calcd. for C<sub>18</sub>H<sub>18</sub>NO<sup>+</sup> [M + H]<sup>+</sup>: 264.1383, found: 264.1394.

***N*-Methyl-*N*-(prop-2-yn-1-yl)-2-propylpentanamide (s27)**

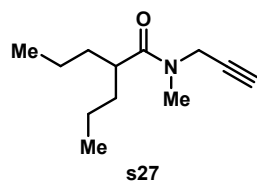

Colourless liquid (520 mg, 89% yield);

**<sup>1</sup>H NMR** (400 MHz, CDCl<sub>3</sub>): δ 4.25 (d, *J* = 2.5 Hz, 1.4H), 4.10 (d, *J* = 2.5 Hz, 0.6H), 3.11 (s, 2H), 3.00 (s, 1H), 2.66 (m, 1H), 2.28 (t, *J* = 2.5 Hz, 0.3H), 2.17 (t, *J* = 2.5 Hz, 0.6H), 1.73 – 1.57 (m, 2H), 1.47 – 1.34 (m, 2H), 1.30 – 1.19 (m, 4H), 0.87 (t, *J* = 7.2 Hz, 6H).

**<sup>13</sup>C NMR** (101 MHz, CDCl<sub>3</sub>): δ 176.4, 72.6, 71.6, 41.0, 39.4, 36.5, 35.4, 34.7, 33.6, 20.9, 20.8, 14.4.

**HRMS (ESI)**: Calcd. for C<sub>12</sub>H<sub>22</sub>NO<sup>+</sup> [M + H]<sup>+</sup>: 196.1696, found: 196.1698.

**(*R*)-5-(1,2-Dithiolan-3-yl)-*N*-methyl-*N*-(prop-2-yn-1-yl)pentanamide (s28)**

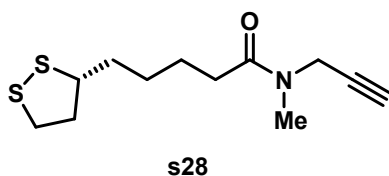

Yellow liquid (650 mg, 85% yield);

**<sup>1</sup>H NMR** (400 MHz, CDCl<sub>3</sub>): δ 4.23 (d, *J* = 2.7 Hz, 1.4H), 4.04 (d, *J* = 2.7 Hz, 0.6H), 3.59 (p, *J* = 6.9 Hz, 1H), 3.20 – 3.09 (m, 2H), 3.06 (s, 2H), 2.99 (s, 1H), 2.46 (m, 1H), 2.39 (t, *J* = 7.3 Hz, 1H), 2.33 (t, *J* = 7.3 Hz, 1H), 2.29 (d, *J* = 2.6 Hz, 0.3H), 2.20 (d, *J* = 2.6 Hz, 0.7H), 1.92 (m, 1H), 1.70 (m, 4H), 1.55 – 1.46 (m, 2H).

**<sup>13</sup>C NMR** (101 MHz, CDCl<sub>3</sub>): δ 172.5, 72.9, 71.8, 56.6, 40.4, 38.6, 36.3, 34.9, 34.5, 33.3, 29.2, 24.8.

**HRMS (ESI)**: Calcd. for C<sub>12</sub>H<sub>20</sub>NOS<sub>2</sub><sup>+</sup> [M + H]<sup>+</sup>: 258.0981, found: 258.0993.

**(4*R*)-4-((3*R*,7*R*,8*R*,9*S*,10*S*,13*R*,14*S*,17*R*)-3,7-Dihydroxy-10,13-dimethylhexadecahydro-1*H*-cyclopenta[*a*]phenanthren-17-yl)-*N*-methyl-*N*-(prop-2-yn-1-yl)pentanamide (s29)**



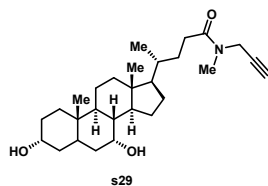

White solid (800 mg, 60% yield); m.p. 95 – 96 °C;

**<sup>1</sup>H NMR** (400 MHz, CDCl<sub>3</sub>): δ 4.22 (s, 1.4H), 4.04 (s, 0.6H), 3.85 (s, 1H), 3.45 (s, 1H), 3.07 (s, 2H), 2.99 (s, 1H), 2.43 – 2.14 (m, 3H), 1.99 – 1.59 (m, 9H), 1.54 – 1.10 (m, 12H), 0.95 (d, *J* = 6.3 Hz, 3H), 0.90 (s, 3H), 0.66 (s, 3H).

**<sup>13</sup>C NMR** (101 MHz, CDCl<sub>3</sub>): δ 173.4, 79.1, 72.8, 72.1, 71.8, 68.6, 55.9, 50.6, 42.8, 41.6, 40.0, 39.8, 39.5, 36.3, 35.6, 35.5, 35.2, 34.7, 34.6, 32.9, 31.3, 31.0, 30.8, 30.3, 28.3, 23.8, 22.9, 20.7, 18.6, 11.9.

**HRMS (ESI)**: Calcd. for C<sub>28</sub>H<sub>46</sub>NO<sub>3</sub><sup>+</sup> [M + H]<sup>+</sup>: 444.3472, found: 444.3473.

***N*-(2-(5-Methoxy-1-methyl-1*H*-indol-3-yl)ethyl)-*N*-(prop-2-yn-1-yl)acetamide (s30)**

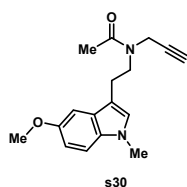

Brown liquid (170 mg, 20% yield);

**<sup>1</sup>H NMR** (400 MHz, CDCl<sub>3</sub>): δ 7.19 (m, 1H), 7.12 (d, *J* = 2.5 Hz, 0.4H), 7.01 (d, *J* = 2.5 Hz, 0.6H), 6.91 (dd, *J* = 9.0, 2.5 Hz, 1H), 6.86 (d, *J* = 9.0 Hz, 1H), 4.28 (d, *J* = 2.5 Hz, 1.2H), 3.91 (d, *J* = 2.5 Hz, 0.8H), 3.87 (d, *J* = 3.5 Hz, 3H), 3.72 (d, *J* = 3.5 Hz, 4H), 3.71 – 3.66 (m, 1H), 3.02 (q, *J* = 7.6 Hz, 2H), 2.28 (t, *J* = 2.6 Hz, 0.3H), 2.24 (t, *J* = 2.6 Hz, 0.6H), 2.19 (s, 1H), 1.95 (s, 2H).

**<sup>13</sup>C NMR** (101 MHz, CDCl<sub>3</sub>): δ 170.4, 154.0, 132.6, 127.8, 112.0, 110.4, 110.1, 110.0, 100.8, 100.5, 79.6, 72.6, 71.8, 56.1, 48.8, 47.6, 39.2, 34.4, 33.0, 24.5, 23.7, 22.0, 21.4.

**HRMS (ESI)**: Calcd. for C<sub>17</sub>H<sub>21</sub>N<sub>2</sub>O<sub>2</sub><sup>+</sup> [M + H]<sup>+</sup>: 285.1598, found: 285.1607.

**2-(Diethylamino)-*N*-(2,6-dimethylphenyl)-*N*-(prop-2-yn-1-yl)acetamide (s31)**

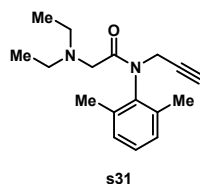

Yellow liquid (604 mg, 74% yield);

**<sup>1</sup>H NMR** (400 MHz, CDCl<sub>3</sub>): δ 7.20 – 7.15 (m, 1H), 7.12 (d, *J* = 7.4 Hz, 2H), 4.41 (s, 2H), 2.84 (s, 2H), 2.55 (q, *J* = 7.2 Hz, 4H), 2.27 (s, 6H), 2.12 (s, 1H), 0.89 (t, *J* = 7.2 Hz, 6H).

$^{13}\text{C}$  NMR (101 MHz,  $\text{CDCl}_3$ ):  $\delta$  170.9, 138.8, 136.8, 129.0, 128.6, 78.5, 72.6, 54.5, 47.5, 37.1, 18.5, 12.1.

**HRMS (ESI):** Calcd. for  $\text{C}_{17}\text{H}_{25}\text{N}_2\text{O}^+$   $[\text{M} + \text{H}]^+$ : 273.1961, found: 273.1967.

***N*-(2,6-Dimethylphenyl)-1-methyl-*N*-(prop-2-yn-1-yl)piperidine-2-carboxamide (s32)**

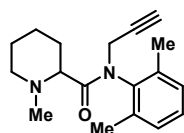

s32

Yellow liquid (511 mg, 60% yield);

$^1\text{H}$  NMR (400 MHz,  $\text{CDCl}_3$ ):  $\delta$  7.07 (s, 2H), 7.04 (s, 1H), 3.59 (d,  $J = 11.7$  Hz, 0.3H), 3.37 (t,  $J = 10.8$  Hz, 0.3H), 3.01 (t,  $J = 11.3$  Hz, 1H), 2.65 (dd,  $J = 10.8$  Hz, 0.7H), 2.42 (d,  $J = 2.8$  Hz, 2H), 2.25 (d,  $J = 2.8$  Hz, 6H), 2.19 (d,  $J = 11.7$  Hz, 0.7H), 2.14 (q,  $J = 8.3, 7.5$  Hz, 3H), 1.79 (q,  $J = 8.3, 6.2$  Hz, 2H), 1.71 (s, 2H), 1.61 (m, 2H), 1.34 – 1.24 (m, 1H).

$^{13}\text{C}$  NMR (101 MHz,  $\text{CDCl}_3$ ):  $\delta$  172.7, 135.4, 128.5, 128.3, 127.2, 77.4, 70.3, 55.8, 45.6, 36.0, 31.7, 25.6, 24.1, 23.8, 23.5, 19.0, 18.8.

**HRMS (ESI):** Calcd. for  $\text{C}_{18}\text{H}_{25}\text{N}_2\text{O}^+$   $[\text{M} + \text{H}]^+$ : 285.1961, found: 285.1972.

***N*-(4-Ethoxyphenyl)-*N*-(prop-2-yn-1-yl)acetamide (s33)**

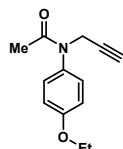

s33

Yellow liquid (326 mg, 50% yield);

$^1\text{H}$  NMR (400 MHz,  $\text{CDCl}_3$ ):  $\delta$  7.17 (d,  $J = 8.8$  Hz, 2H), 6.91 (d,  $J = 8.8$  Hz, 2H), 4.44 (d,  $J = 2.5$  Hz, 2H), 4.04 (q,  $J = 7.0$  Hz, 2H), 2.19 (t,  $J = 2.5$  Hz, 1H), 1.85 (s, 2H), 1.43 (t,  $J = 7.0$  Hz, 3H).

$^{13}\text{C}$  NMR (101 MHz,  $\text{CDCl}_3$ ):  $\delta$  170.6, 158.8, 134.9, 129.2, 115.3, 79.4, 72.0, 63.8, 38.4, 22.4, 14.9.

**HRMS (ESI):** Calcd. for  $\text{C}_{13}\text{H}_{16}\text{NO}_2^+$   $[\text{M} + \text{H}]^+$ : 218.1176, found: 218.1182.

***N*-Benzyl-*N*-(prop-2-yn-1-yl)acetamide (s34)**

The  $^1\text{H}$  spectra data matched with values reported in the literature<sup>9</sup>.

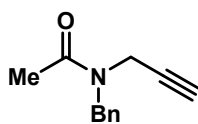

**s34**

Colourless liquid (393 mg, 70% yield);

<sup>1</sup>H NMR (400 MHz, CDCl<sub>3</sub>): δ 7.38 – 7.15 (m, 5H), 4.66 (d, *J* = 2.8 Hz, 2H), 4.20 (d, *J* = 2.5 Hz, 1H), 3.90 (d, *J* = 2.5 Hz, 1H), 2.28 (t, *J* = 2.5 Hz, 0.4H), 2.24 (s, 1.5H), 2.20 (t, *J* = 2.5 Hz, 0.6H), 2.16 (s, 1.5H).

Method C: Synthesis of compound **43**.

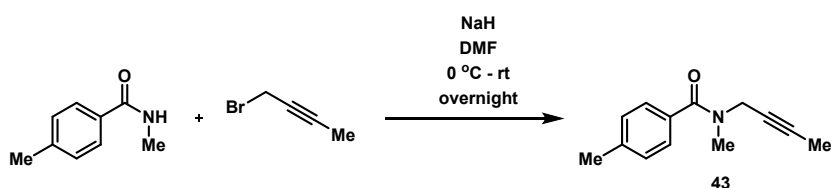

Add sodium hydride (60% dispersion in mineral oil, 3.6 mmol, 1.2 eq.) to a solution of *N*,4-dimethylbenzamide (3 mmol, 1.0 eq.) in anhydrous DMF (10 mL) at 0 °C, stir the reaction mixture for 15 minutes. Then 1-bromo-2-butyne (3.6 mmol, 1.2 eq.) was added dropwise to the above solution, and the obtained solution was stirred at room temperature for overnight. After the completion of the reaction, ice water was added into solution. The solution was diluted with EtOAc (30 mL) and quenched with water (30 mL). The aqueous layer was extracted with EtOAc (3 × 30 mL). The combined EtOAc layers were washed with brine (3 × 30 mL), dried over Na<sub>2</sub>SO<sub>4</sub>, and concentrated *in vacuo*. Purification by flash column chromatography using PE/EtOAc as eluent afforded the desired product **43**.

***N*-(but-2-yn-1-yl)-*N*,4-dimethylbenzamide (43)**

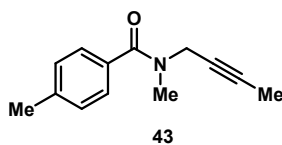

**43**

Yellow liquid (400 mg, 63% yield);

<sup>1</sup>H NMR (400 MHz, CDCl<sub>3</sub>): δ 7.40 (s, 2H), 7.20 (d, *J* = 7.2 Hz, 2H), 4.31 (s, 1H), 3.96 (s, 1H), 3.08 (d, *J* = 26.8 Hz, 3H), 2.37 (s, 3H), 1.85 (s, 3H).

<sup>13</sup>C NMR (101 MHz, CDCl<sub>3</sub>): δ 171.5, 140.0, 132.8, 129.0, 127.3, 73.8, 42.1, 36.9, 32.8, 21.5, 3.6.

Method D: Synthesis of compound **45**.

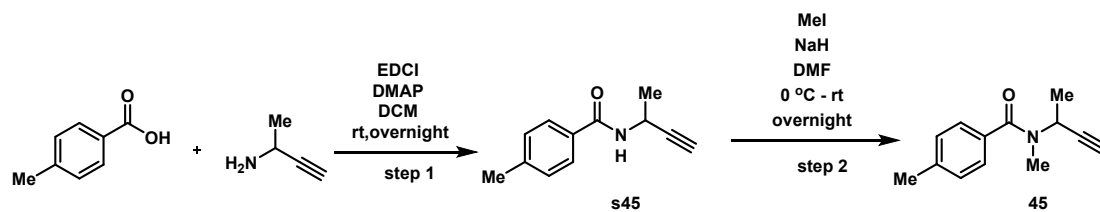

Step 1: At room temperature, *p*-toluic acid (5 mmol, 1.0 eq.) was dissolved in DCM (20 mL) in a 50 mL round bottom flask, then EDCI (7.5 mmol, 1.5 eq.) and DMAP (0.75 mmol, 0.15 eq.) was added. Then But-3-yn-2-amine (3.6 mmol, 1.2 eq.) was added dropwise to the above solution, and the obtained solution was stirred at room temperature for overnight. After the completion of the reaction, the solution was diluted with DCM (30 mL) and quenched with 1N HCl aqueous or water (30 mL). The aqueous layer was extracted with DCM (3 × 30 mL). The combined DCM layers were washed with brine (3 × 30 mL), dried over Na<sub>2</sub>SO<sub>4</sub>, and concentrated *in vacuo*. Purification by flash column chromatography using PE/EtOAc as eluent afforded the desired product **s45**.

Step 2: Add sodium hydride (60% dispersion in mineral oil, 3.6 mmol, 1.2 eq.) to a solution of **s45** (3 mmol, 1.0 eq.) in anhydrous DMF (10 mL) at 0 °C, stir the reaction mixture for 15 minutes. Then MeI (3.6 mmol, 1.2 eq.) was added dropwise to the above solution, and the obtained solution was stirred at room temperature for overnight. After the completion of the reaction, ice water was added into solution. The solution was diluted with EtOAc (30 mL) and quenched with water (30 mL). The aqueous layer was extracted with EtOAc (3 × 30 mL). The combined EtOAc layers were washed with brine (3 × 30 mL), dried over Na<sub>2</sub>SO<sub>4</sub>, and concentrated *in vacuo*. Purification by flash column chromatography using PE/EtOAc as eluent afforded the desired product **45**.

#### ***N*-(But-3-yn-2-yl)-4-methylbenzamide (s45)**

The <sup>1</sup>H spectra data matched with values reported in the literature<sup>10</sup>.

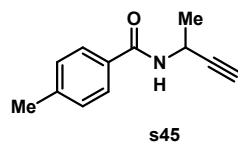

Colourless liquid (560 mg, 60% yield);

<sup>1</sup>H NMR (400 MHz, CDCl<sub>3</sub>): δ 7.71 (d, *J* = 7.5 Hz, 2H), 7.31–7.23 (m, 2H), 6.29 (s, 1H), 5.06 (s, 1H), 2.43 (s, 3H), 2.34 (s, 1H), 1.56 (d, *J* = 6.7 Hz, 3H).

#### ***N*-(But-3-yn-2-yl)-*N*,4-dimethylbenzamide (45)**

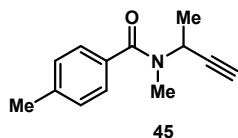

Colourless liquid (300 mg, 60% yield);

<sup>1</sup>H NMR (400 MHz, CDCl<sub>3</sub>): δ 7.34 (d, *J* = 7.5 Hz, 2H), 7.21 (d, *J* = 7.2 Hz, 2H), 5.64 (s, 0.5H), 4.75 (s, 0.5H), 3.01 (s, 3H), 2.38 (s, 3H), 2.34 (s, 1H), 1.42 (s, 3H).

<sup>13</sup>C NMR (101 MHz, CDCl<sub>3</sub>): δ 171.5, 140.1, 133.2, 129.3, 127.3, 126.9, 72.3, 59.73, 47.1, 41.5, 32.6, 28.0, 21.6, 20.6, 19.3.

Method E: Synthesis of compound **s2**.

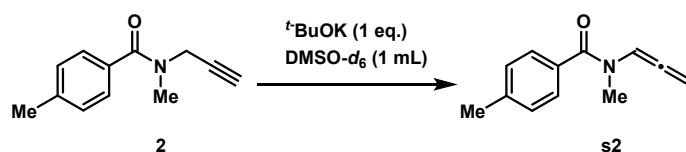

At room temperature, *N*-propynylamide (1 mmol, 1.0 eq.) was dissolved in DMSO (1 mL) in a 10 mL round bottom flask, then *t*-BuOK (1 mmol, 1.0 eq.) was added. After the completion of the reaction, The solution was diluted with EtOAc (5 mL) and brine (20 mL), and extracted with EtOAc (3 × 20 mL). The combined organic layers were washed with brine (3 × 20 mL), dried over Na<sub>2</sub>SO<sub>4</sub>, and concentrated *in vacuo*. Purification by flash column chromatography using PE/EtOAc (v/v = 10/1) as eluent afforded the desired product **s2**.

***N*,4-Dimethyl-*N*-(propa-1,2-dien-1-yl)benzamide (s2)**

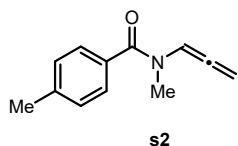

Yellow liquid (100 mg, 52% yield);

<sup>1</sup>H NMR (400 MHz, CDCl<sub>3</sub>): δ 7.69 (s, 0.2H), 7.38 (s, 2H), 7.22 (d, *J* = 7.8 Hz, 2H), 6.78 (s, 0.45H), 5.37 (s, 2H), 3.08 (d, *J* = 47.8 Hz, 3H), 2.38 (s, 3H).

Method F: Synthesis of compound **47**.

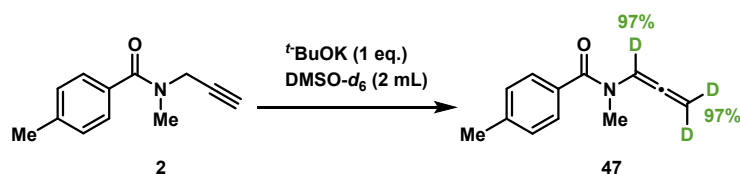

At room temperature, *N*-propynylamide (2 mmol, 1.0 eq.) was dissolved in DMSO-*d*<sub>6</sub> (2 mL) in a 10 mL

round bottom flask, then *t*-BuOK (2 mmol, 1.0 eq.) was added. After the completion of the reaction, The solution was diluted with EtOAc (5 mL) and brine (20 mL), and extracted with EtOAc (3 × 20 mL). The combined organic layers were washed with brine (3 × 20 mL), dried over Na<sub>2</sub>SO<sub>4</sub>, and concentrated *in vacuo*. Purification by flash column chromatography using PE/EtOAc (v/v = 10/1) as eluent afforded the desired product 47.

***N*,4-Dimethyl-*N*-(propa-1,2-dien-1-yl-*d*<sub>3</sub>)benzamide (47)**

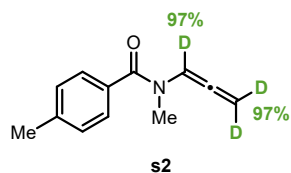

Yellow liquid (228 mg, 60% yield, 2.91 D/molecule);

**<sup>1</sup>H NMR** (400 MHz, CDCl<sub>3</sub>): δ 7.64 (s, 0.01H), 7.39 (d, *J* = 7.7 Hz, 2H), 7.22 (d, *J* = 7.7 Hz, 2H), 6.79 (s, 0.02H), 5.38 (s, 0.06H), 3.08 (d, *J* = 43.8 Hz, 3H), 2.38 (s, 3H).

**<sup>13</sup>C NMR** (101 MHz, CDCl<sub>3</sub>): δ 200.0, 172.5, 169.7, 164.5-164.0 (m), 143.1, 140.5, 131.9, 129.6, 129.1, 128.1, 103.7, 86.8, 35.7, 31.3, 27.5, 21.4.

### III. Investigation of Reaction Conditions

#### Characterization the ratio of **3** and **47**.

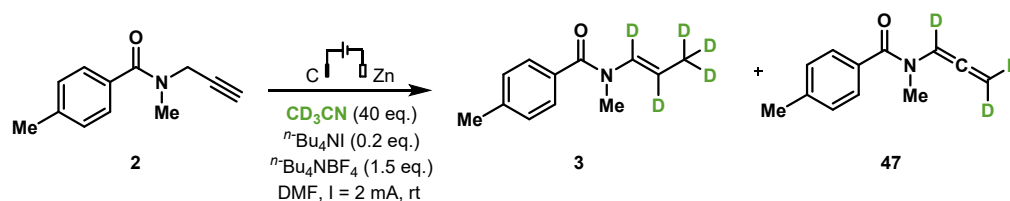

A 10 mL distillation flask equipped with a magnetic stir bar was charged with compound **2** (37 mg, 0.2 mmol, 1.0 eq.),  $\text{CD}_3\text{CN}$  (0.42 mL, 40.0 eq.),  $n\text{-Bu}_4\text{NI}$  (15 mg, 0.04 mmol, 0.2 eq.),  $n\text{-Bu}_4\text{NBF}_4$  (99 mg, 0.3 mmol, 1.5 eq.) and DMF (3 mL). The flask equipped with graphite anode ( $d = 5 \text{ mm}$ ) and zinc cathode ( $d = 5 \text{ mm}$ ). The resulting solution was stirred and electrolyzed at a constant current of 2 mA (Single Output DC Power Supply: KRP-305DM) for 1 h at room temperature. The solution was diluted with EtOAc (5 mL) and brine (20 mL), and extracted with EtOAc ( $3 \times 20 \text{ mL}$ ). The combined organic layers were washed with brine ( $3 \times 20 \text{ mL}$ ), dried over  $\text{Na}_2\text{SO}_4$ , and concentrated *in vacuo*. Purification by flash column chromatography using PE/EtOAc ( $v/v = 10/1$ ) as eluent afforded the mixture product **3** and **47** (22mg) as yellow oil.

Because of the  $^1\text{H}$  NMR of the mixture product **3** and **47** can't display the ratio of **3** and **47** (Figure S1), we represented the ratio of **3** and **47** by calculating the  $m/z$  peak height ratio of **3** and **47** detected by LC/MS. As shown in Figure S2, DAD of the mixture product **3** and **47** just displays singlet, the ratio of **3** and **47** can't be judged by the peak area ratio. Then, we use the option of "averaging the selected position spectra" for the MS region of the mixture, the  $m/z$  peak height of **3** is 2.58, the  $m/z$  peak height of **47** is 5.02, the  $m/z$  peak height ratio of **3** and **47** is 1 : 1.95.

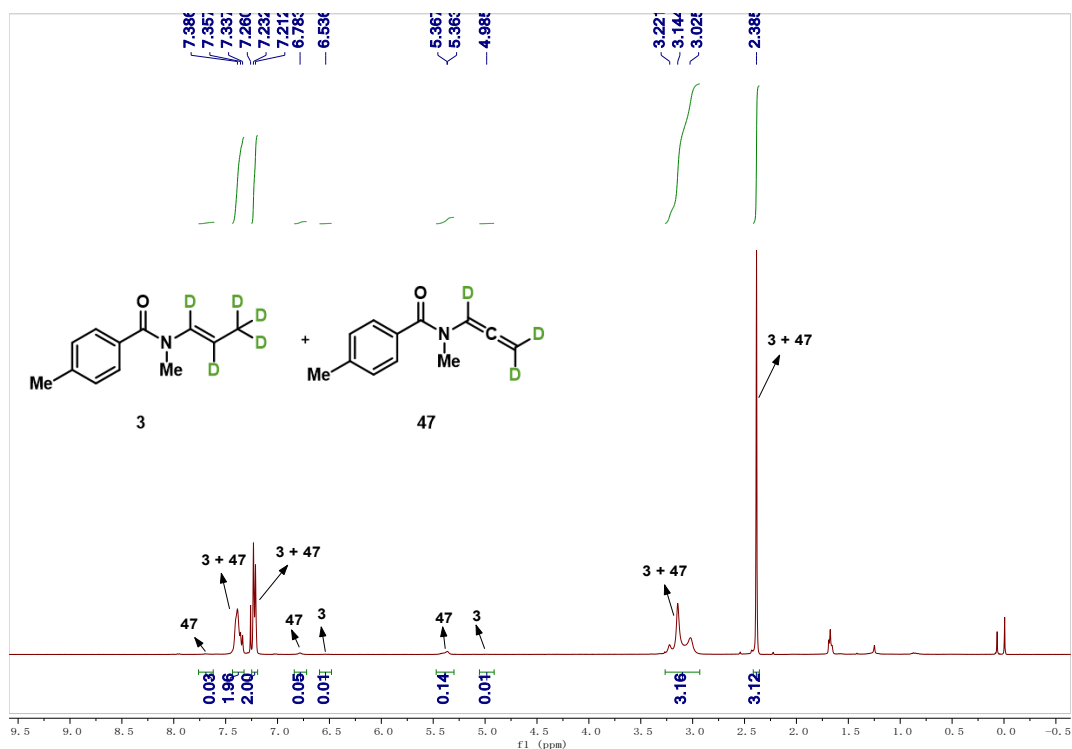

Figure S1:  $^1\text{H}$  NMR (400 Hz,  $\text{CDCl}_3$ ) of the mixture product **3** and **47**

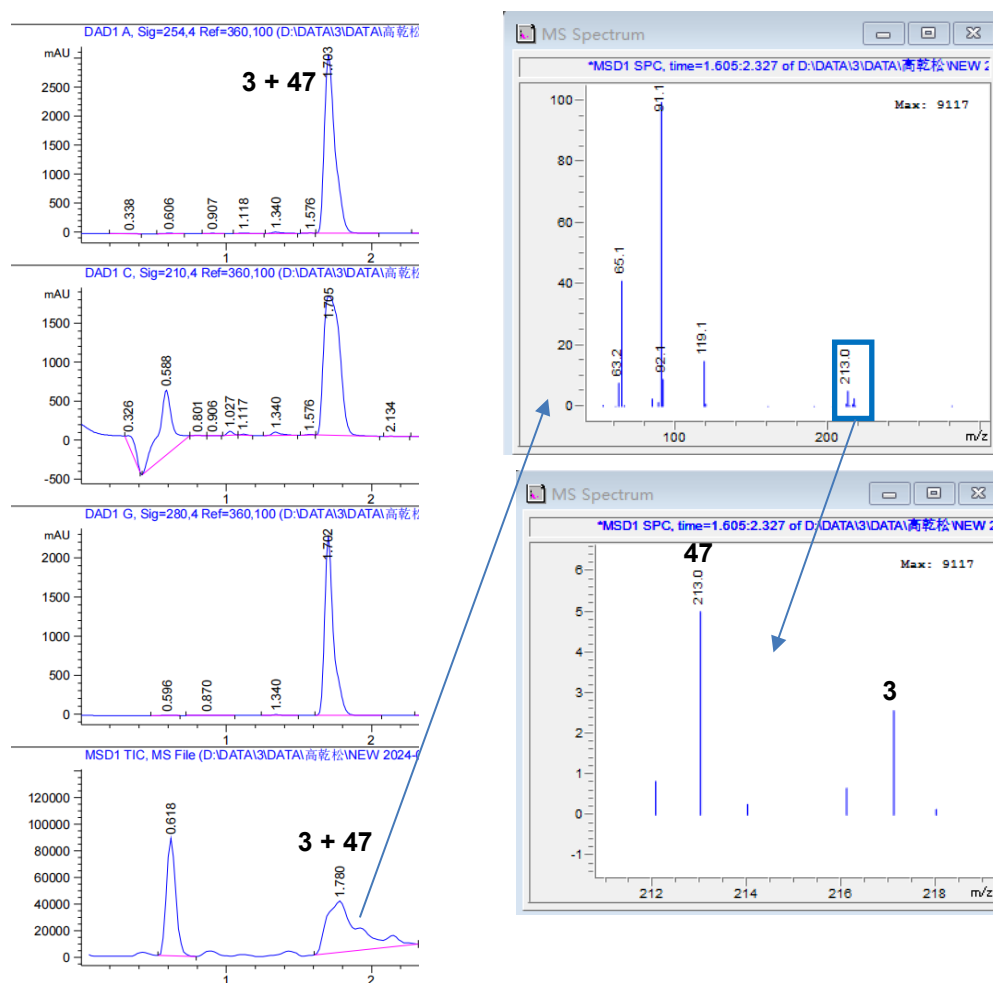

Figure S2: The  $m/z$  peak height ratio of **3** and **47** detected by LC/MS.



## Characterization the ratio of s3 and s2.

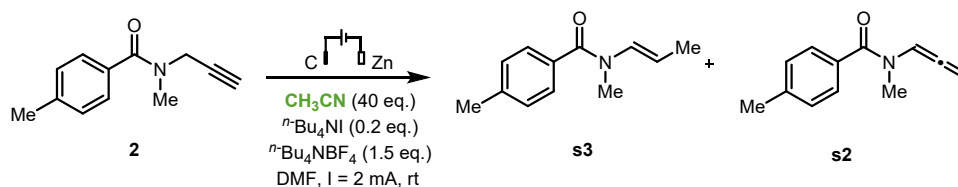

A 10 mL distillation flask equipped with a magnetic stir bar was charged with compound **2** (37 mg, 0.2 mmol, 1.0 eq.),  $\text{CH}_3\text{CN}$  (0.42 mL, 40.0 eq.),  $n\text{-Bu}_4\text{NI}$  (15 mg, 0.04 mmol, 0.2 eq.),  $n\text{-Bu}_4\text{NBF}_4$  (99 mg, 0.3 mmol, 1.5 eq.) and DMF (3 mL). The flask equipped with graphite anode ( $d = 5 \text{ mm}$ ) and zinc cathode ( $d = 5 \text{ mm}$ ). The resulting solution was stirred and electrolyzed at a constant current of 2 mA (Single Output DC Power Supply: KRP-305DM) for 1 h at room temperature. The solution was diluted with EtOAc (5 mL) and brine (20 mL), and extracted with EtOAc ( $3 \times 20 \text{ mL}$ ). The combined organic layers were washed with brine ( $3 \times 20 \text{ mL}$ ), dried over  $\text{Na}_2\text{SO}_4$ , and concentrated *in vacuo*. Purification by flash column chromatography using PE/EtOAc ( $v/v = 10/1$ ) as eluent afforded the mixture product **s3** and **s2** (22mg) as yellow oil. The structure of **s2** in the reaction mixture was verified by comparison of the  $^1\text{H}$  NMR spectrum of **s2** and Figure S3.

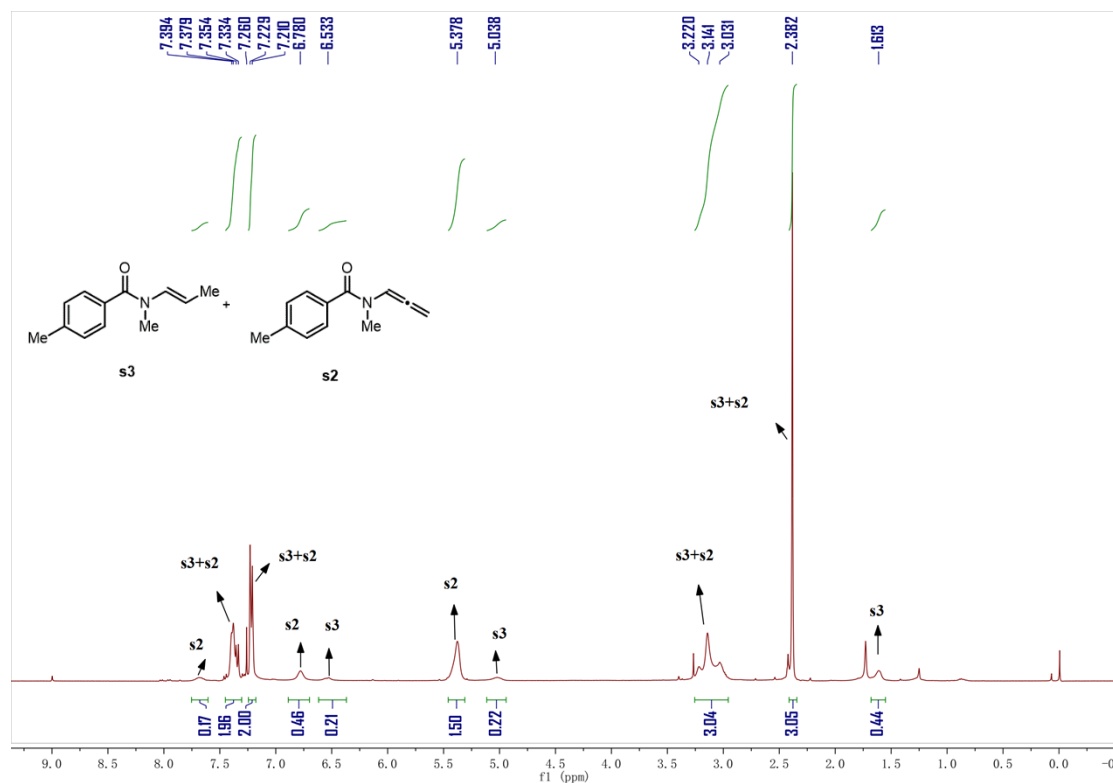

Figure S3:  $^1\text{H}$  NMR (400 HZ,  $\text{CDCl}_3$ ) of the mixture product **s3** and **s2**

**Table S1.** Investigation of deuterium source<sup>a</sup>: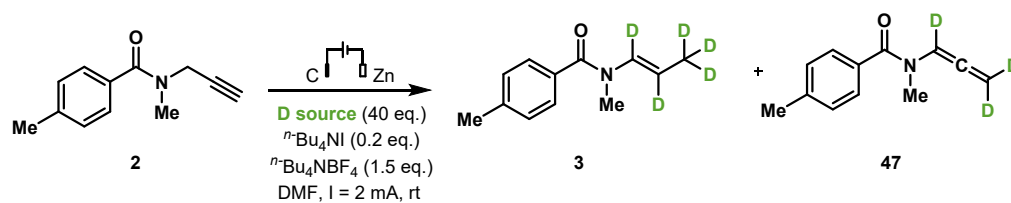

| entry | variation of deuterium source      | yield <sup>b</sup> ( <b>3:47</b> ) <sup>c</sup> | D/molecule      |
|-------|------------------------------------|-------------------------------------------------|-----------------|
| 1     | CD <sub>3</sub> CN                 | 56 (1:1.95)                                     | ND <sup>d</sup> |
| 2     | CD <sub>3</sub> OD                 | 0                                               | ND <sup>d</sup> |
| 3     | EtOD                               | 0                                               | ND <sup>d</sup> |
| 4     | D <sub>2</sub> O                   | 0                                               | ND <sup>d</sup> |
| 5     | (CD <sub>3</sub> ) <sub>2</sub> SO | 39 (1:0.83)                                     | ND <sup>d</sup> |
| 6     | (CD <sub>3</sub> ) <sub>2</sub> CO | 0                                               | ND <sup>d</sup> |

<sup>a</sup>Reaction conditions: Graphite anode (d = 5 mm), zinc cathode (d = 5 mm), **2** (0.2 mmol), deuterium source (40 eq.), *n*-Bu<sub>4</sub>NI (0.2 eq.), *n*-Bu<sub>4</sub>NBF<sub>4</sub> (1.5 eq.), DMF (3 mL), undivided cell, constant current = 2 mA, room temperature, 1 h. <sup>b</sup>Isolated yield. <sup>c</sup>The m/z peak height ratio of **3** and **47** was detected by LC/MS. <sup>d</sup>ND = not determined by <sup>1</sup>H NMR.

**Table S2.** Investigation of solvent<sup>a</sup>: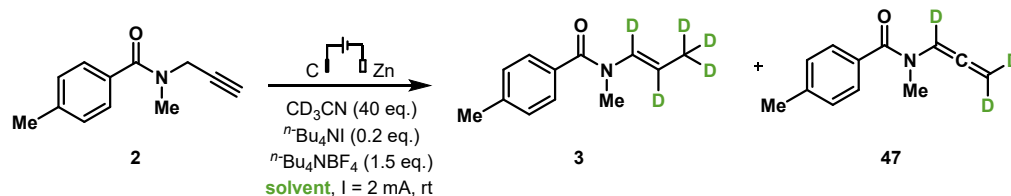

| entry | variation of solvent (3 mL) | yield <sup>b</sup> ( <b>3:47</b> ) <sup>c</sup> | D/molecule      |
|-------|-----------------------------|-------------------------------------------------|-----------------|
| 1     | MeCN                        | 0                                               | ND <sup>d</sup> |
| 2     | DCM                         | 0                                               | ND <sup>d</sup> |
| 3     | NMP                         | trace                                           | ND <sup>d</sup> |
| 4     | THF                         | 0                                               | ND <sup>d</sup> |
| 5     | DMA                         | 39 (1:1)                                        | ND <sup>d</sup> |

<sup>a</sup>Reaction conditions: Graphite anode (d = 5 mm), zinc cathode (d = 5 mm), **2** (0.2 mmol), CD<sub>3</sub>CN (40 eq.), *n*-Bu<sub>4</sub>NI (0.2 eq.), *n*-Bu<sub>4</sub>NBF<sub>4</sub> (1.5 eq.), solvent (3 mL), undivided cell, constant current = 2 mA, room temperature, 1 h. <sup>b</sup>Isolated yield. <sup>c</sup>The m/z peak height ratio of **3** and **47** was detected by LC/MS. <sup>d</sup>ND = not determined by <sup>1</sup>H NMR.

**Table S3.** Investigation of cathode<sup>a</sup>: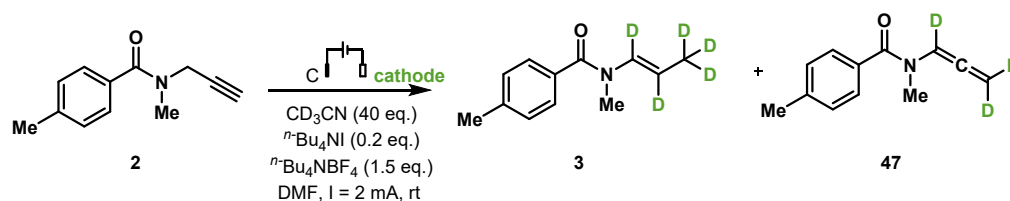

| entry | variation of cathode | yield <sup>b</sup> ( <b>3</b> : <b>47</b> ) <sup>c</sup> | D/molecule      |
|-------|----------------------|----------------------------------------------------------|-----------------|
| 1     | Pt                   | 52 (1:1.5)                                               | ND <sup>d</sup> |
| 2     | Cu                   | 52 (1:1.3)                                               | ND <sup>d</sup> |
| 3     | Mo                   | 52 (1:1.8)                                               | ND <sup>d</sup> |
| 4     | steel                | 58 (1:1.1)                                               | ND <sup>d</sup> |
| 5     | Ti                   | 58 (1:1.3)                                               | ND <sup>d</sup> |
| 6     | Mg                   | 55 (1:2)                                                 | ND <sup>d</sup> |
| 7     | Al                   | 58 (1:1)                                                 | ND <sup>d</sup> |

<sup>a</sup>Reaction conditions: Graphite anode (d = 5 mm), cathode (d = 5 mm), **2** (0.2 mmol),  $\text{CD}_3\text{CN}$  (40 eq.),  $n\text{-Bu}_4\text{NI}$  (0.2 eq.),  $n\text{-Bu}_4\text{NBF}_4$  (1.5 eq.), DMF (3 mL), undivided cell, constant current = 2 mA, room temperature, 1 h. <sup>b</sup>Isolated yield. <sup>c</sup>The m/z peak height ratio of **3** and **47** was detected by LC/MS. <sup>d</sup>ND = not determined by <sup>1</sup>H NMR.

**Table S4.** Investigation of current and time<sup>a</sup>: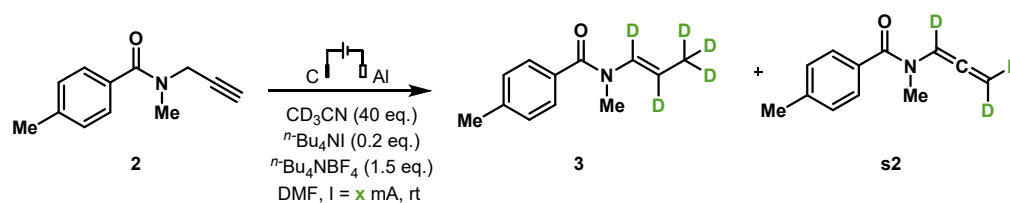

| entry | variation of current and time | yield <sup>b</sup> ( <b>3</b> : <b>47</b> ) <sup>c</sup> | D/molecule      |
|-------|-------------------------------|----------------------------------------------------------|-----------------|
| 2     | 4 mA, 3h                      | 28% (1:0.1)                                              | ND <sup>d</sup> |
| 3     | 3 mA, 4h                      | 32% (1:0.03)                                             | ND <sup>d</sup> |
| 4     | 2 mA, 6h                      | 36% (1:0)                                                | 4.85            |

<sup>a</sup>Reaction conditions: Graphite anode (d = 5 mm), aluminium cathode (d = 5 mm), **2** (0.2 mmol),  $\text{CD}_3\text{CN}$  (40 eq.),  $n\text{-Bu}_4\text{NI}$  (0.2 eq.),  $n\text{-Bu}_4\text{NBF}_4$  (1.5 eq.), DMF (3 mL), undivided cell, constant current = x mA, room temperature, 3-6 h. <sup>b</sup>Isolated yield. <sup>c</sup>The m/z peak height ratio of **3** and **47** was detected by LC/MS. <sup>d</sup>ND = not determined by <sup>1</sup>H NMR.

**Table S5.** Investigation of electrolytes<sup>a</sup>: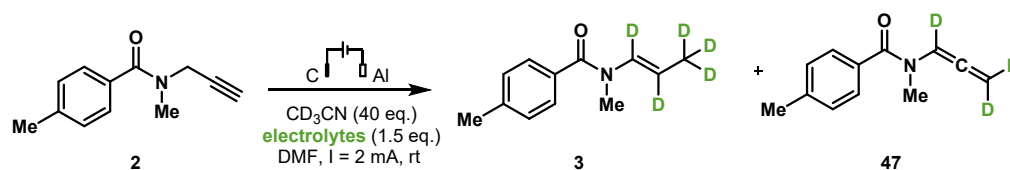

| entry          | variation of electrolytes                   | yield <sup>b</sup> ( <b>3</b> : <b>47</b> ) <sup>c</sup> | D/molecule      |
|----------------|---------------------------------------------|----------------------------------------------------------|-----------------|
| 1              | <i>n</i> -Bu <sub>4</sub> NPF <sub>6</sub>  | 72% (1:0.4)                                              | ND <sup>d</sup> |
| 2              | <i>n</i> -Bu <sub>4</sub> NClO <sub>4</sub> | 39% (1:0.3)                                              | ND <sup>d</sup> |
| 3              | LiClO <sub>4</sub>                          | 0                                                        | ND <sup>d</sup> |
| 4              | <i>n</i> -Bu <sub>4</sub> NBr               | 39% (1:0.3)                                              | ND <sup>d</sup> |
| 5              | <i>n</i> -Bu <sub>4</sub> NI                | 62% (1:0.25)                                             | ND <sup>d</sup> |
| 6 <sup>d</sup> | <i>n</i> -Bu <sub>4</sub> NI                | 39% (1:0)                                                | 4.88            |

<sup>a</sup>Reaction conditions: Graphite anode (d = 5 mm), aluminium cathode (d = 5 mm), **2** (0.2 mmol), CD<sub>3</sub>CN (40 eq.), electrolytes (1.5 eq.), DMF (3 mL), undivided cell, constant current = 2 mA, room temperature, 3 h. <sup>b</sup>Isolated yield.

<sup>c</sup>The m/z peak height ratio of **3** and **47** was detected by LC/MS. <sup>d</sup>ND = not determined by <sup>1</sup>H NMR.

**Table S6.** Investigation of mediators<sup>a</sup>: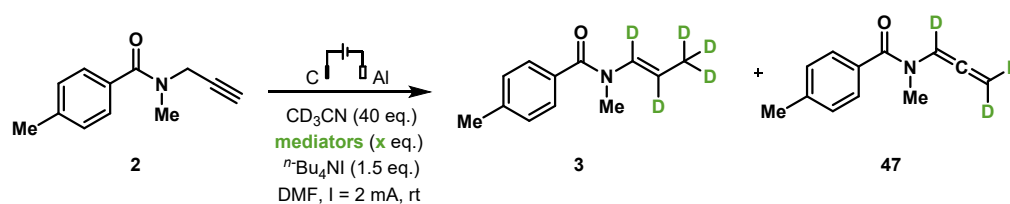

| entry          | variation of mediators      | yield <sup>b</sup> ( <b>3</b> : <b>47</b> ) <sup>c</sup> | D/molecule      |
|----------------|-----------------------------|----------------------------------------------------------|-----------------|
| 1              | TEMPO (0.2 eq.)             | 28 (1:0)                                                 | ND <sup>d</sup> |
| 2              | FeCl <sub>3</sub> (0.2 eq.) | 34 (1:0)                                                 | ND <sup>d</sup> |
| 3              | Phenanthrene (2 eq.)        | 39 (1:0)                                                 | ND <sup>d</sup> |
| 4 <sup>e</sup> | PPh <sub>3</sub> (2 eq.)    | 52 (1:0)                                                 | 4.88            |
| 5              | DIPEA (2 eq.)               | 31 (1:0)                                                 | ND <sup>d</sup> |

<sup>a</sup>Reaction conditions: Graphite anode (d = 5 mm), aluminium cathode (d = 5 mm), **2** (0.2 mmol), CD<sub>3</sub>CN (40 eq.), mediators (x eq.), *n*-Bu<sub>4</sub>NI (1.5 eq.), DMF (3 mL), undivided cell, constant current = 2 mA, room temperature, 6 h.

<sup>b</sup>Isolated yield. <sup>c</sup>The m/z peak height ratio of **3** and **47** was detected by LC/MS. <sup>d</sup>ND = not determined by <sup>1</sup>H NMR.

<sup>e</sup>7h instead of 6h.

**Table S7.** Investigation of anode<sup>a</sup>: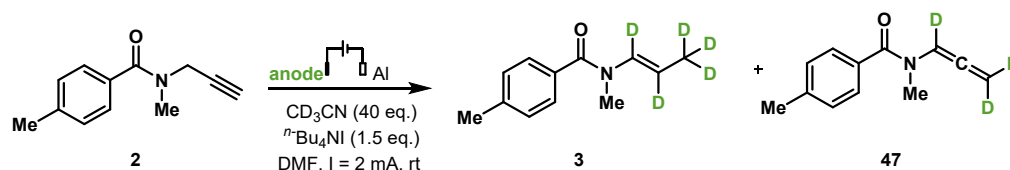

| entry | variation of anode | yield <sup>b</sup> ( <b>3:47</b> ) <sup>c</sup> | D/molecule      |
|-------|--------------------|-------------------------------------------------|-----------------|
| 1     | Zn                 | 49 (1:0)                                        | ND <sup>d</sup> |
| 2     | Cu                 | 28 (1:0)                                        | ND <sup>d</sup> |
| 3     | Pt                 | 42 (1:0)                                        | ND <sup>d</sup> |
| 4     | Mo                 | 15 (1:0)                                        | ND <sup>d</sup> |
| 5     | Ti                 | 26 (1:0)                                        | ND <sup>d</sup> |
| 6     | Mg                 | 31 (1:0)                                        | ND <sup>d</sup> |
| 7     | Al                 | 52 (1:0)                                        | ND <sup>d</sup> |

<sup>a</sup>Reaction conditions: Anode (d = 5 mm), aluminium cathode (d = 5 mm), **2** (0.2 mmol), CD<sub>3</sub>CN (40 eq.), <sup>n</sup>Bu<sub>4</sub>NI (1.5 eq.), DMF (3 mL), undivided cell, constant current = 2 mA, room temperature, 6 h. <sup>b</sup>Isolated yield. <sup>c</sup>The m/z peak height ratio of **3** and **47** was detected by LC/MS. <sup>d</sup>ND = not determined by <sup>1</sup>H NMR.

**Table S8.** Investigation of the amount of PPh<sub>3</sub><sup>a</sup>: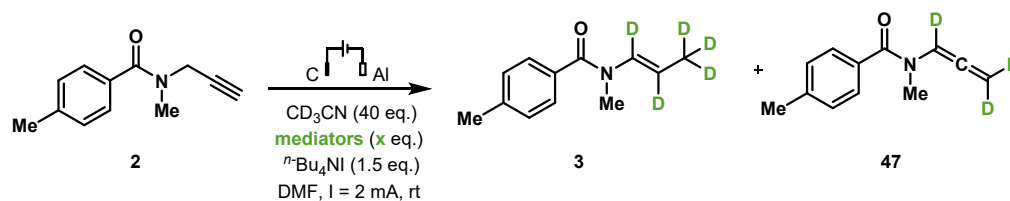

| entry | variation of the amount of PPh <sub>3</sub> | yield <sup>b</sup> ( <b>3:47</b> ) <sup>c</sup> | D/molecule      |
|-------|---------------------------------------------|-------------------------------------------------|-----------------|
| 1     | PPh <sub>3</sub> (1 eq.)                    | 62 (1:0)                                        | ND <sup>d</sup> |
| 2     | PPh <sub>3</sub> (2 eq.)                    | 72 (1:0)                                        | 4.91            |
| 3     | PPh <sub>3</sub> (3 eq.)                    | 72 (1:0)                                        | ND <sup>d</sup> |

<sup>a</sup>Reaction conditions: Aluminium anode (d = 5 mm), aluminium cathode (d = 5 mm), **2** (0.2 mmol), CD<sub>3</sub>CN (40 eq.), mediators (x eq.), <sup>n</sup>Bu<sub>4</sub>NI (1.5 eq.), DMF (3 mL), undivided cell, constant current = 2 mA, room temperature, 7 h. <sup>b</sup>Isolated yield. <sup>c</sup>The m/z peak height ratio of **3** and **47** was detected by LC/MS. <sup>d</sup>ND = not determined by <sup>1</sup>H NMR.

**Table S9.** Control reactions of optimized conditions<sup>a</sup>: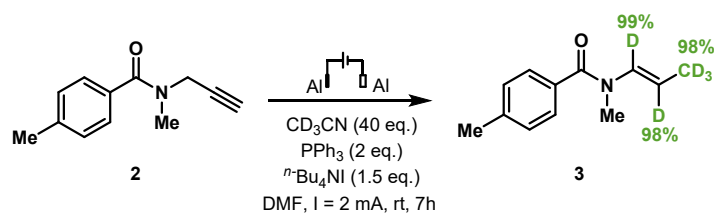

| entry | variation from standard conditions                                                 | D/molecule of <b>3</b> <sup>b</sup> |
|-------|------------------------------------------------------------------------------------|-------------------------------------|
| 1     | none                                                                               | 4.91 (72%) <sup>c</sup>             |
| 2     | no PPh <sub>3</sub>                                                                | 4.87 (49 %) <sup>c</sup>            |
| 3     | <i>n</i> -Bu <sub>4</sub> NBF <sub>4</sub> instead of <i>n</i> -Bu <sub>4</sub> NI | 4.88 (28 %) <sup>d</sup>            |
| 4     | D <sub>2</sub> O instead of CD <sub>3</sub> CN                                     | trace <sup>c</sup>                  |
| 5     | DMSO- <i>d</i> <sub>6</sub> instead of CD <sub>3</sub> CN                          | 4.83 (52%) <sup>c</sup>             |
| 6     | CH <sub>2</sub> Cl <sub>2</sub> instead of DMF                                     | -                                   |
| 7     | EtOH instead of DMF                                                                | -                                   |
| 8     | graphite (+) instead of aluminium (+)                                              | 4.88 (52%) <sup>c</sup>             |
| 9     | 3 mA, 4.7 h instead of 2mA, 7h                                                     | 4.90 (59%) <sup>c</sup>             |
| 10    | no electric current                                                                | 0                                   |

<sup>a</sup>Standard conditions: Aluminium anode (d = 5 mm), aluminium cathode (d = 5 mm), **2** (0.2 mmol), CD<sub>3</sub>CN (40 eq.), PPh<sub>3</sub> (2 eq.), *n*-Bu<sub>4</sub>NI (1.5 eq.), DMF (3 mL), undivided cell, constant current = 2 mA, room temperature, 7 h. <sup>b</sup>The number of incorporated deuterium atoms per molecule. <sup>c</sup>Isolated yields in parentheses. <sup>d</sup>Yield was determined by <sup>1</sup>H NMR spectroscopy with 1,3,5-trimethoxybenzene as an internal standard. <sup>e</sup>7% yield of *N*,4-dimethylbenzamide was obtained and 79% yield of the substrate **2** was recovered.

## IV. Experimental Procedures and Compound Characterization

General procedure for electroreductive deuteration of *N*-propynylamides to enamides (Procedure A):

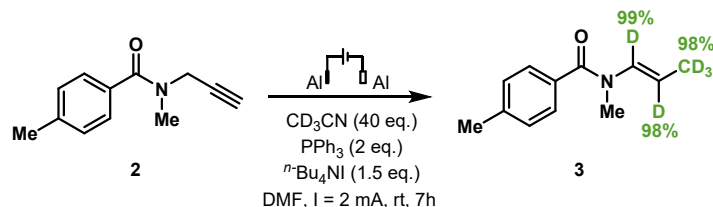

A 10 mL distillation flask equipped with a magnetic stir bar was charged with compound **2** (37 mg, 0.2 mmol, 1.0 eq.),  $\text{CD}_3\text{CN}$  (0.42 mL, 40.0 eq.),  $\text{PPh}_3$  (105 mg, 0.4 mmol, 2.0 eq.),  $n\text{-Bu}_4\text{NI}$  (111 mg, 0.3 mmol, 1.5 eq.) and DMF (3 mL). The flask equipped with aluminium anode ( $d = 5 \text{ mm}$ ) and aluminium cathode ( $d = 5 \text{ mm}$ ). The resulting solution was stirred and electrolyzed at a constant current of 2 mA (Single Output DC Power Supply: KRP-305DM) for 7 h at room temperature. The solution was diluted with EtOAc (5 mL) and brine (20 mL), and extracted with EtOAc ( $3 \times 20 \text{ mL}$ ). The combined organic layers were washed with brine ( $3 \times 20 \text{ mL}$ ), dried over  $\text{Na}_2\text{SO}_4$ , and concentrated *in vacuo*. Purification by flash column chromatography using PE/EtOAc ( $v/v = 10/1$ ) as eluent afforded the desired product **3**.

### (*E*)-*N*,4-Dimethyl-*N*-(prop-1-en-1-yl- $d_5$ )benzamide (**3**)

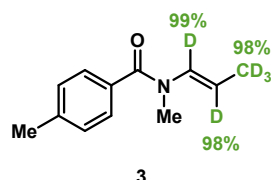

Colourless liquid (28 mg, 72% yield, 4.91 D/molecule);

$^1\text{H NMR}$  (300 MHz,  $\text{CDCl}_3$ ):  $\delta$  7.34 (d,  $J = 8.0 \text{ Hz}$ , 2H), 7.21 (d,  $J = 8.0 \text{ Hz}$ , 2H), 6.53 (s, 0.01H), 5.00 (s, 0.02H), 3.20 (s, 3H), 2.38 (s, 3H), 1.58 (s, 0.06H).

$^{13}\text{C NMR}$  (101 MHz,  $\text{CDCl}_3$ ):  $\delta$  170.2, 140.3, 132.8, 129.6, 129.2, 129.0, 128.1, 105.1, 30.4, 21.5, 14.7.

**HRMS (ESI)**: Calcd. for  $\text{C}_{12}\text{H}_{11}\text{D}_5\text{NO}^+$  [ $\text{M} + \text{H}$ ] $^+$ : 195.1540, found: 195.1547.

### (*E*)-*N*,1-Dimethyl-*N*-(prop-1-en-1-yl- $d_5$ )-1*H*-pyrrole-2-carboxamide (**4**)

Following Procedure A, using 13 h instead of 7 h.

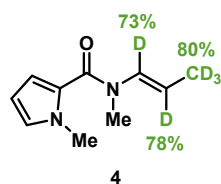

Colourless liquid (22 mg, 60% yield, 3.91 D/molecule);

**<sup>1</sup>H NMR** (400 MHz, CDCl<sub>3</sub>): δ 6.71 (d, *J* = 10.9 Hz, 1H), 6.47 (m, 1H), 6.09 (d, *J* = 15.9 Hz, 1H), 5.85 (s, 0.27H), 5.01 (s, 0.22H), 3.94 (s, 1.9H), 3.80 (s, 1.1H), 3.22 (s, 1.1H), 2.92 (s, 1.9H), 2.43 (d, *J* = 9.8 Hz, 0.6H).

**<sup>13</sup>C NMR** (101 MHz, CDCl<sub>3</sub>): δ 162.5, 130.9, 127.3, 125.2, 115.5, 107.2, 104.9, 36.1, 31.7, 14.3.

**HRMS (ESI)**: Calcd. for C<sub>10</sub>H<sub>10</sub>D<sub>5</sub>N<sub>2</sub>O<sup>+</sup> [M + H]<sup>+</sup>: 184.1493, found: 184.1500.

**(*E*)-*N*-Methyl-*N*-(prop-1-en-1-yl-*d*<sub>5</sub>)furan-2-carboxamide (5)**

Following Procedure A, using 11.5 h instead of 7 h.

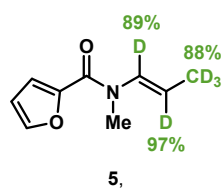

Colourless liquid (18 mg, 53% yield, 4.50 D/molecule);

**<sup>1</sup>H NMR** (400 MHz, CDCl<sub>3</sub>): δ 7.55 (s, 1H), 7.09 (s, 0.11H), 7.01 (s, 1H), 6.50 (s, 1H), 5.45 (s, 0.03H), 3.26 (s, 3H), 1.73 (s, 0.36H).

**<sup>13</sup>C NMR** (101 MHz, CDCl<sub>3</sub>): δ 158.9, 147.6, 144.6, 117.7, 117.3, 111.4, 107.5, 31.6, 14.9.

**HRMS (ESI)**: Calcd. for C<sub>9</sub>H<sub>7</sub>D<sub>5</sub>NO<sub>2</sub><sup>+</sup> [M + H]<sup>+</sup>: 171.1176, found: 171.1173.

**(*E*)-*N*-Methyl-*N*-(prop-1-en-1-yl-*d*<sub>5</sub>)thiophene-2-carboxamide (6)**

Following Procedure A, using 18 h instead of 7 h.

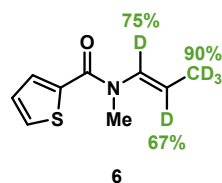

Colourless liquid (15 mg, 40% yield, 4.12 D/molecule);

**<sup>1</sup>H NMR** (400 MHz, CDCl<sub>3</sub>): δ 7.51 – 7.46 (m, 1H), 7.40 (d, *J* = 3.6 Hz, 1H), 7.13 – 7.02 (m, 1H), 6.84 (s, 0.25H), 5.36 (m, 0.33H), 3.24 (d, *J* = 21.4 Hz, 3H), 1.70 (s, 0.3H).

**<sup>13</sup>C NMR** (101 MHz, CDCl<sub>3</sub>): δ 163.1, 137.7, 130.7, 130.0, 127.0, 120.4, 115.5, 29.8, 14.9.

**HRMS (ESI)**: Calcd. for C<sub>9</sub>H<sub>7</sub>D<sub>5</sub>NOS<sup>+</sup> [M + H]<sup>+</sup>: 187.0948, found: 187.0944.

**(*E*)-*N*-Methyl-4-phenyl-*N*-(prop-1-en-1-yl-*d*<sub>5</sub>)butanamide-2,2-*d*<sub>2</sub> (7)**

Following Procedure A.



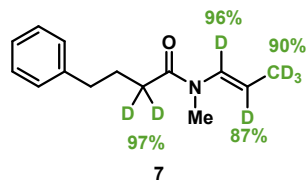

Colourless liquid (27 mg, 61% yield, 6.47 D/molecule);

<sup>1</sup>H NMR (300 MHz, CDCl<sub>3</sub>): δ 7.30 (m, 2H), 7.20 (d, *J* = 6.9 Hz, 3H), 6.51 (s, 0.04H), 4.97 (s, 0.13H), 3.08 – 2.95 (m, 3H), 2.69 (t, *J* = 7.5 Hz, 2H), 2.42 – 2.38 (m, 0.06H), 1.99 (t, *J* = 7.5 Hz, 2H), 1.66 (s, 0.3H).

<sup>13</sup>C NMR (101 MHz, CDCl<sub>3</sub>): δ 171.0, 141.6, 128.5, 128.4, 126.3, 126.0, 106.3, 35.2, 32.2, 29.8, 26.4, 14.9.

HRMS (ESI): Calcd. for C<sub>14</sub>H<sub>13</sub>D<sub>7</sub>NO<sup>+</sup> [M + H]<sup>+</sup>: 225.1979, found: 225.1980.

**(*E*)-*N*-Methyl-*N*-(prop-1-en-1-yl-*d*<sub>5</sub>)tetrahydro-2*H*-pyran-4-carboxamide-4-*d* (8)**

Following Procedure A, using 11 h instead of 7 h.

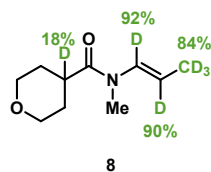

Colourless liquid (23 mg, 61% yield, 4.52 D/molecule);

<sup>1</sup>H NMR (400 MHz, CDCl<sub>3</sub>): δ 6.67 (s, 0.08H), 5.03 (s, 0.1H), 4.03 (d, *J* = 11.3 Hz, 2H), 3.48 (t, *J* = 11.3 Hz, 2H), 3.12 (s, 1H), 3.07 (s, 2H), 2.86 (d, *J* = 11.8 Hz, 0.82H), 1.90 (t, *J* = 11.3 Hz, 2H), 1.71 – 1.64 (m, 2.48 H).

<sup>13</sup>C NMR (101 MHz, CDCl<sub>3</sub>): δ 172.8, 172.3, 128.3, 128.1, 107.5, 67.2, 38.6, 38.2, 32.2, 30.4, 28.9, 28.9, 14.9.

HRMS (ESI): Calcd. for C<sub>10</sub>H<sub>11</sub>D<sub>6</sub>NO<sub>2</sub>Na<sup>+</sup> [M + Na]<sup>+</sup>: 212.1528, found: 212.1531.

**Methyl (*E*)-4-(methyl(prop-1-en-1-yl-*d*<sub>5</sub>)carbamoyl)bicyclo[2.2.2]octane-1-carboxylate (9)**

Following Procedure A, using 11 h instead of 7 h.

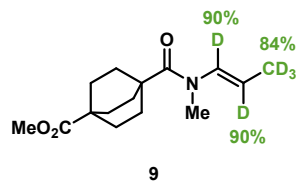

White solid (33 mg, 61% yield, 4.32 D/molecule); m.p. 97 – 99 °C;

<sup>1</sup>H NMR (400 MHz, CDCl<sub>3</sub>): δ 7.01 (s, 0.1H), 4.97 (s, 0.1H), 3.65 (s, 3H), 3.09 (s, 3H), 1.95 (d, *J* =

8.0 Hz, 6H), 1.85 (d,  $J = 8.0$  Hz, 6H), 1.69 (s, 0.48H).

$^{13}\text{C}$  NMR (101 MHz,  $\text{CDCl}_3$ ):  $\delta$  177.9, 174.9, 130.4, 106.2, 51.8, 40.4, 40.2, 38.8, 33.2, 28.0, 14.8.

**HRMS (ESI)**: Calcd. for  $\text{C}_{15}\text{H}_{19}\text{D}_5\text{NO}_3^+$  [ $\text{M} + \text{H}$ ] $^+$ : 271.2065, found: 271.2068.

**(1R,3R,5S)-N-Methyl-N-((E)-prop-1-en-1-yl- $d_5$ )adamantane-1-carboxamide (10)**

Following Procedure A, using 12 h instead of 7 h.

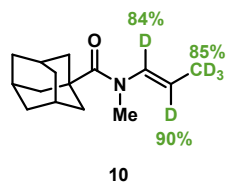

White solid (29 mg, 61% yield, 4.29 D/molecule); m.p. 90 – 92 °C;

$^1\text{H}$  NMR (400 MHz,  $\text{CDCl}_3$ ):  $\delta$  7.16 (s, 0.16H), 4.95 (s, 0.1H), 3.11 (s, 3H), 2.05 (s, 9H), 1.73 (s, 6H), 1.70 (s, 0.45H).

$^{13}\text{C}$  NMR (101 MHz,  $\text{CDCl}_3$ ):  $\delta$  175.6, 130.7, 105.5, 42.5, 39.1, 36.7, 33.1, 28.5, 15.1.

**HRMS (ESI)**: Calcd. for  $\text{C}_{15}\text{H}_{19}\text{D}_5\text{NO}^+$  [ $\text{M} + \text{H}$ ] $^+$ : 239.2166, found: 239.2157.

**(E)-N-Methyl-N-(prop-1-en-1-yl- $d_5$ )-2,3-dihydrobenzofuran-2-carboxamide- $2-d$  (11)**

Following Procedure A, using 11 h instead of 7 h.

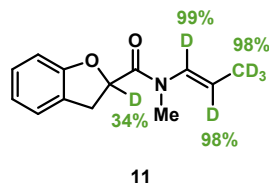

Yellow liquid (27 mg, 61% yield, 5.25 D/molecule);

$^1\text{H}$  NMR (400 MHz,  $\text{CDCl}_3$ ):  $\delta$  7.20 (d,  $J = 7.5$  Hz, 1H), 7.13 (t,  $J = 7.5$  Hz, 1H), 6.91 – 6.86 (m, 1H), 6.83 (t,  $J = 7.5$  Hz, 1H), 5.95 (s, 0.01H), 5.45 (m, 0.66H), 5.00 (s, 0.02H), 3.77 (t,  $J = 14.8$  Hz, 1H), 3.38 (dd,  $J = 14.8, 7.1$  Hz, 1H), 3.21 (s, 1.4H), 3.07 (s, 1.6H), 1.55 (s, 0.06H).

$^{13}\text{C}$  NMR (101 MHz,  $\text{CDCl}_3$ ):  $\delta$  167.2, 158.5, 129.7, 128.3, 125.8, 125.7, 125.0, 121.4, 121.3, 115.5, 109.7, 109.6, 33.0, 32.3, 32.2, 31.9, 14.6 – 13.8(m).

**HRMS (ESI)**: Calcd. for  $\text{C}_{10}\text{H}_{12}\text{D}_6\text{NO}_2^+$  [ $\text{M} + \text{H}$ ] $^+$ : 190.1709, found: 190.1703.

**(E)-2-(Prop-1-en-1-yl- $d_5$ )isoindolin-1-one-3,3- $d_2$  (12)**

Following Procedure A, using 6 h instead of 7 h.

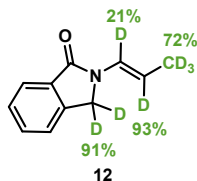

Colourless liquid (22 mg, 61% yield, 5.12 D/molecule);

**<sup>1</sup>H NMR** (300 MHz, DMSO-*d*<sub>6</sub>): δ 7.72 (dt, *J* = 7.5, 1.0 Hz, 1H), 7.66 – 7.59 (m, 2H), 7.50 (dd, *J* = 7.5, 1.9 Hz, 1H), 6.97 (s, 0.79H), 5.26 (s, 0.07H), 4.60 (s, 0.18H), 1.71 (s, 0.84H).

**<sup>13</sup>C NMR** (101 MHz, CDCl<sub>3</sub>): δ 166.0, 140.6, 132.6, 132.0, 128.3, 124.1, 123.9, 122.8, 106.2 – 105.7 (m), 48.2 – 47.5 (m), 15.2 – 14.51 (m).

**HRMS (ESI)**: Calcd. for C<sub>11</sub>H<sub>5</sub>D<sub>7</sub>NO<sup>+</sup> [M + H]<sup>+</sup>: 181.1353, found: 181.1357.

**(*E*)-2-(Prop-1-en-1-yl-*d*<sub>3</sub>)-3,4-dihydroisoquinolin-1(2*H*)-one-4,4-*d*<sub>2</sub> (13)**

Following Procedure A, using 10 h instead of 7 h.

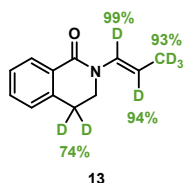

Colourless liquid (27 mg, 70% yield, 6.20 D/molecule);

**<sup>1</sup>H NMR** (300 MHz, CDCl<sub>3</sub>): δ 8.09 (dd, *J* = 7.6, 1.5 Hz, 1H), 7.42 (td, *J* = 7.4, 1.5 Hz, 1H), 7.33 (td, *J* = 7.6, 1.4 Hz, 1H), 7.19 (dd, *J* = 7.4, 1.4 Hz, 1H), 6.91 (s, 0.01H), 5.13 (s, 0.06H), 3.70 (d, *J* = 5.1 Hz, 2H), 3.08 – 2.98 (m, 0.52H), 1.77 – 1.72 (s, 0.21H).

**<sup>13</sup>C NMR** (101 MHz, CDCl<sub>3</sub>): δ 162.1, 137.7, 132.0, 129.2, 128.7, 127.5, 127.2, 126.9, 106.4, 42.8, 27.4, 27.1, 14.2.

**HRMS (ESI)**: Calcd. for C<sub>12</sub>H<sub>7</sub>D<sub>7</sub>NO<sup>+</sup> [M + H]<sup>+</sup>: 195.1509, found: 195.1513.

**(*E*)-5-(Prop-1-en-1-yl-*d*<sub>3</sub>)phenanthridin-6(5*H*)-one (14)**

Following Procedure A, using 12 h instead of 7 h.

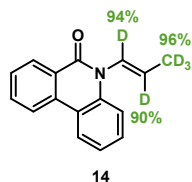

Colourless liquid (30 mg, 63% yield, 4.72 D/molecule);

**<sup>1</sup>H NMR** (300 MHz, CDCl<sub>3</sub>): δ 8.57 (d, *J* = 7.8 Hz, 1H), 8.30 (d, *J* = 8.3 Hz, 2H), 7.78 (t, *J* = 7.8 Hz, 1H), 7.60 (t, *J* = 7.5 Hz, 1H), 7.52 (t, *J* = 7.8 Hz, 1H), 7.38 (d, *J* = 8.3 Hz, 1H), 7.32 (t, *J* = 7.5 Hz, 1H), 6.01 (s, 0.06H), 5.04 (s, 0.10H), 1.54 (s, 0.12H).

**<sup>13</sup>C NMR** (101 MHz, CDCl<sub>3</sub>): δ 161.3, 137.1, 133.7, 132.7, 132.5, 129.4, 128.9, 127.9, 125.4, 123.2, 122.8, 122.4, 121.6, 119.3, 115.7, 44.4.

**HRMS (ESI)**: Calcd. for C<sub>16</sub>H<sub>9</sub>D<sub>5</sub>NO<sup>+</sup> [M + H]<sup>+</sup>: 241.1384, found: 241.1395.

**(*E*)-4-Phenyl-1-(prop-1-en-1-yl-*d*<sub>5</sub>)pyrrolidin-2-one-3,3-*d*<sub>2</sub> (15)**

Following Procedure A, using 12 h instead of 7 h.

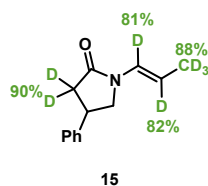

Colourless liquid (29 mg, 70% yield, 6.07 D/molecule);

**<sup>1</sup>H NMR** (400 MHz, CDCl<sub>3</sub>): δ 7.35 (t, *J* = 7.5 Hz, 2H), δ 7.28 (d, *J* = 7.5 Hz, 1H), 7.23 (d, *J* = 7.5 Hz, 2H), 6.94 (s, 0.19H), 4.93 (s, 0.18H), 3.89 (t, *J* = 9.1 Hz, 1H), 3.61 (t, *J* = 9.1 Hz, 1H), 3.51 – 3.46 (m, 1H), 2.62 (s, 0.2H), 1.70 (s, 0.36H).

**<sup>13</sup>C NMR** (101 MHz, CDCl<sub>3</sub>): δ 171.4, 142.4, 129.0, 127.3, 126.8, 124.1, 106.9, 53.0, 52.6, 36.8, 14.7.

**HRMS (ESI)**: Calcd. for C<sub>13</sub>H<sub>9</sub>D<sub>7</sub>NO<sup>+</sup> [M + H]<sup>+</sup>: 209.1666, found: 209.1673.

**(*E*)-1-(Prop-1-en-1-yl-*d*<sub>5</sub>)azacyclotridecan-2-one-3,3-*d*<sub>2</sub> (16)**

Following Procedure A, using 11 h instead of 7 h.

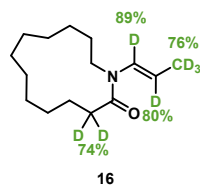

Colourless liquid (33 mg, 68% yield, 5.45 D/molecule);

**<sup>1</sup>H NMR** (400 MHz, CDCl<sub>3</sub>): δ 6.53 (s, 0.11H), 5.02 (s, 0.2H), 4.49 (t, *J* = 11.9 Hz, 1H), 3.43 (t, *J* = 8.1 Hz, 1H), 2.99 (d, *J* = 11.9 Hz, 1H), 2.27 (s, 0.52H), 1.74 (m, 4.72H), 1.48 (s, 4H), 1.28 (s, 9H).

**<sup>13</sup>C NMR** (101 MHz, CDCl<sub>3</sub>): δ 172.6, 171.8, 128.5, 107.4, 43.8, 42.2, 33.9 – 33.5(m), 26.9, 26.7, 26.4, 26.0, 25.4, 24.9, 24.7, 24.4, 24.3, 24.2, 23.9, 23.5, 23.2, 15.2.

**HRMS (ESI)**: Calcd. for C<sub>15</sub>H<sub>21</sub>D<sub>7</sub>NO<sup>+</sup> [M + H]<sup>+</sup>: 245.2605, found: 245.2614.

**(*E*)-2-(Dibenzylamino)-*N*-methyl-*N*-(prop-1-en-1-yl-*d*<sub>5</sub>)acetamide-*d*<sub>2</sub> (17)**

Following Procedure A, using 21 h instead of 7 h.

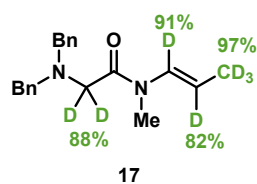

Colourless liquid (40 mg, 63% yield, 6.40 D/molecule);

$^1\text{H NMR}$  (400 MHz,  $\text{CDCl}_3$ ):  $\delta$  7.39 – 7.19 (m, 10H), 6.67 (s, 0.09H), 4.90 (s, 0.18H), 3.69 (s, 1H), 3.65 (s, 3H), 3.35 (s, 0.24H), 2.99 (s, 2.28H), 2.93 (s, 0.72H), 1.67 (s, 0.09H).

$^{13}\text{C NMR}$  (101 MHz,  $\text{CDCl}_3$ ):  $\delta$  169.0, 168.7, 138.7, 129.3, 129.3, 128.4, 127.3, 105.4, 58.6, 58.4, 56.8 – 55.9(m), 32.1, 29.6, 14.7 – 14.3(m).

**HRMS (ESI)**: Calcd. for  $\text{C}_{20}\text{H}_{18}\text{D}_7\text{N}_2\text{O}^+$   $[\text{M} + \text{H}]^+$ : 316.2401, found: 316.2408.

**(R,E)-1-Benzyl-N-methyl-N-(prop-1-en-1-yl- $d_5$ )pyrrolidine-2-carboxamide (18)**

Following Procedure A, using 10 h instead of 7 h.

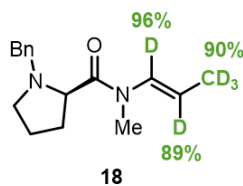

Colourless liquid (32 mg, 60% yield, 4.55 D/molecule);

$^1\text{H NMR}$  (400 MHz,  $\text{CDCl}_3$ ):  $\delta$  7.28 (s, 5H), 6.92 (s, 0.04H), 4.98 (s, 0.11H), 3.94 (t,  $J = 14.6$  Hz, 1H), 3.52 – 3.43 (m, 2H), 3.09 (s, 1H), 3.06 (s, 3H), 2.35 (d,  $J = 9.0$  Hz, 1H), 2.15 (s, 1H), 1.91 (m, 2H), 1.81 (t,  $J = 9.0$  Hz, 1H), 1.67 (s, 0.3H).

$^{13}\text{C NMR}$  (101 MHz,  $\text{CDCl}_3$ ):  $\delta$  171.5, 138.5, 129.3, 128.9, 128.2, 127.0, 106.5, 65.1, 58.1, 52.7, 31.9, 30.5, 29.0, 22.8.

**HRMS (ESI)**: Calcd. for  $\text{C}_{16}\text{H}_{18}\text{D}_5\text{N}_2\text{O}^+$   $[\text{M} + \text{H}]^+$ : 264.2119, found: 264.2118.

**(E)-1-Benzyl-N-methyl-N-(prop-1-en-1-yl- $d_5$ )piperidine-2-carboxamide (19)**

Following Procedure A, using 13 h instead of 7 h.

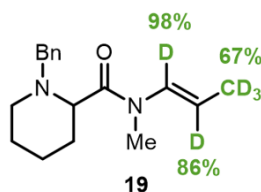

Colourless liquid (28 mg, 50% yield, 3.85 D/molecule);

$^1\text{H NMR}$  (400 MHz,  $\text{CDCl}_3$ ):  $\delta$  7.28 (s, 5H), 6.99 (s, 0.02H), 5.01 (0.14H), 3.80 (t,  $J = 13.2$  Hz, 1H),

3.38 –3.09 (m, 5H), 2.96 (d,  $J = 12.4$  Hz, 1H), 1.97 (s, 1H), 1.77 (m, 3.99H), 1.55 (s, 2H), 1.33 (s, 1H).

$^{13}\text{C}$  NMR (101 MHz,  $\text{CDCl}_3$ ):  $\delta$  171.6, 171.1, 138.2, 138.0, 129.2, 128.2, 127.0, 105.7, 59.8, 51.6, 32.1, 30.4, 28.3, 28.1, 24.9, 24.8, 23.7, 23.6, 14.9.

**HRMS (ESI):** Calcd. for  $\text{C}_{17}\text{H}_{20}\text{D}_5\text{N}_2\text{O}^+$  [ $\text{M} + \text{H}$ ] $^+$ : 278.2275, found: 278.2280.

**(*E*)-1-Benzyl-*N*-methyl-*N*-(prop-1-en-1-yl- $d_5$ )piperidine-3-carboxamide (20)**

Following Procedure A, using 12 h instead of 7 h.

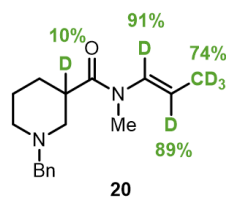

Colourless liquid (28 mg, 51% yield, 4.12 D/molecule);

$^1\text{H}$  NMR (400 MHz,  $\text{CDCl}_3$ ):  $\delta$  7.28 (m, 5H), 6.65 (s, 0.09H), 4.98 (s, 0.11H), 3.59 – 3.41 (m, 2H), 3.05 (s, 0.78H), 3.01 (s, 2.22H), 2.91 (m, 2.9H), 2.16 (d,  $J = 11.1$  Hz, 1H), 2.00 (t,  $J = 11.1$  Hz, 1H), 1.82 (s, 1H), 1.77 – 1.63 (m, 2.78H), 1.52 (m, 1H).

$^{13}\text{C}$  NMR (101 MHz,  $\text{CDCl}_3$ ):  $\delta$  172.8, 138.4, 129.3, 128.6, 128.3, 127.1, 107.2, 63.5, 55.9, 54.0, 40.3, 32.2, 30.2, 27.6, 25.1.

**HRMS (ESI):** Calcd. for  $\text{C}_{17}\text{H}_{20}\text{D}_5\text{N}_2\text{O}^+$  [ $\text{M} + \text{H}$ ] $^+$ : 278.2275, found: 278.2283.

**(*E*)-1-Benzyl-*N*-methyl-*N*-(prop-1-en-1-yl- $d_5$ )piperidine-4-carboxamide (21)**

Following Procedure A, using 27 h instead of 7 h.

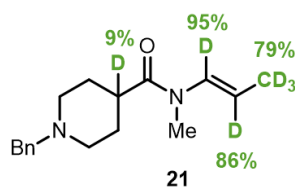

Colourless liquid (19 mg, 35% yield, 4.27 D/molecule);

$^1\text{H}$  NMR (400 MHz,  $\text{CDCl}_3$ ):  $\delta$  7.33 (s, 5H), 6.64 (s, 0.05H), 5.03 (s, 0.14H), 3.57 (s, 2H), 3.09 (s, 0.8H), 3.05 (s, 2.2H), 2.99 (d,  $J = 11.1$  Hz, 2H), 2.62 (s, 0.91H), 2.10 (s, 2H), 1.87 (m, 2.63H), 1.76 (s, 2H).

$^{13}\text{C}$  NMR (101 MHz,  $\text{CDCl}_3$ ):  $\delta$  173.5, 173.1, 138.3, 129.1, 128.5, 128.2, 127.0, 106.9, 63.2, 53.1, 39.7, 39.3, 32.1, 30.2, 28.6, 15.3 – 14.6 (m).

**HRMS (ESI):** Calcd. for  $\text{C}_{17}\text{H}_{20}\text{D}_5\text{N}_2\text{O}^+$  [ $\text{M} + \text{H}$ ] $^+$ : 278.2275, found: 278.2283.

**(*E*)-*N*,4-Dimethyl-*N*-(prop-1-en-1-yl- $d_5$ )benzenesulfonamide (22)**

Following Procedure A, using 8 h instead of 7 h.

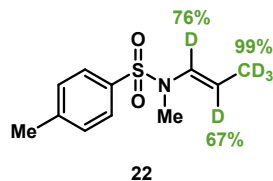

Colourless liquid (28 mg, 60% yield, 4.40 D/molecule);

$^1\text{H NMR}$  (400 MHz,  $\text{CDCl}_3$ ):  $\delta$  7.67 (d,  $J = 8.2$  Hz, 2H), 7.32 (d,  $J = 8.2$  Hz, 2H), 6.90 (s, 0.24H), 5.28 (s, 0.33H), 2.71 (s, 3H), 2.43 (s, 3H), 2.04 (s, 0.03H).

$^{13}\text{C NMR}$  (101 MHz,  $\text{CDCl}_3$ ):  $\delta$  144.0, 133.8, 129.8, 127.5, 101.9, 87.4, 33.3, 21.7, 15.2.

**HRMS (ESI)**: Calcd. for  $\text{C}_{11}\text{H}_{11}\text{D}_5\text{NO}_2\text{S}^+$   $[\text{M} + \text{H}]^+$ : 231.1210, found: 231.1200.

**(E)-5-(2,5-Dimethylphenoxy)-N,2,2-trimethyl-N-(prop-1-en-1-yl- $d_5$ )pentanamide (23)**

Following Procedure A, using 17 h instead of 7 h.

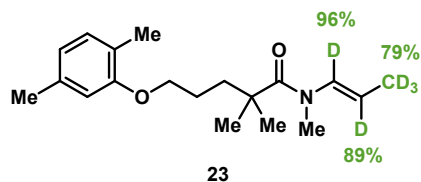

Colourless liquid (31 mg, 50% yield, 4.22 D/molecule);

$^1\text{H NMR}$  (400 MHz,  $\text{CDCl}_3$ ):  $\delta$  7.00 (d,  $J = 7.5$  Hz, 1H), 6.85 (s, 0.04H), 6.65 (d,  $J = 7.5$  Hz, 1H), 6.59 (s, 1H), 4.99 (s, 0.11H), 3.91 (t,  $J = 5.9$  Hz, 2H), 3.11 (s, 3H), 2.30 (s, 3H), 2.16 (s, 3H), 1.86 (m, 2H), 1.78 – 1.67 (m, 2.63H), 1.34 (s, 6H).

$^{13}\text{C NMR}$  (101 MHz,  $\text{CDCl}_3$ ):  $\delta$  175.3, 157.0, 136.5, 133.9, 130.3, 123.5, 120.7, 111.8, 106.4, 67.8, 43.2, 37.6, 33.0, 32.9, 27.3, 25.3, 21.5, 15.9, 15.2 – 14.8(m).

**HRMS (ESI)**: Calcd. for  $\text{C}_{19}\text{H}_{24}\text{D}_5\text{NO}_2\text{Na}^+$   $[\text{M} + \text{Na}]^+$ : 331.2404, found: 331.2392.

**(E)-2-(4-Isobutylphenyl)-N-methyl-N-(prop-1-en-1-yl- $d_5$ )propanamide-2- $d$  (24)**

Following Procedure A, using 10.5 h instead of 7 h.

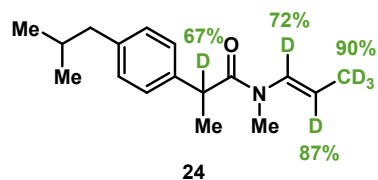

Colourless liquid (27 mg, 51% yield, 4.96 D/molecule);

$^1\text{H NMR}$  (400 MHz,  $\text{CDCl}_3$ ):  $\delta$  7.15 (d,  $J = 7.8$  Hz, 2H), 7.08 (d,  $J = 7.8$  Hz, 2H), 6.66 (s, 0.28H), 4.95 (s, 0.13H), 3.95 (q,  $J = 6.6$  Hz, 0.33H), 3.07 (s, 2H), 2.93 (s, 1H), 2.43 (d,  $J = 7.1$  Hz, 2H), 1.84 (m, 1H), 1.70 – 1.63 (s, 0.3H), 1.45 (d,  $J = 6.6$  Hz, 3H), 0.89 (d,  $J = 6.8$ , 6H).

$^{13}\text{C}$  NMR (101 MHz,  $\text{CDCl}_3$ ):  $\delta$  172.6, 172.1, 140.4, 138.7, 129.8, 129.7, 127.0, 107.5, 45.2, 32.4, 30.8, 30.3, 22.5, 21.0 – 20.7(m), 15.0.

**HRMS (ESI):** Calcd. for  $\text{C}_{17}\text{H}_{20}\text{D}_6\text{NO}^+$   $[\text{M} + \text{H}]^+$ : 266.2386, found: 266.2375.

**(E)-2-(6-Methoxynaphthalen-2-yl)-N-methyl-N-(prop-1-en-1-yl- $d_5$ )propanamide-2- $d$  (25)**

Following Procedure A, using 16 h instead of 7 h.

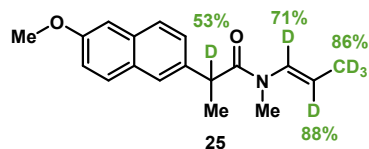

Colourless liquid (26 mg, 45% yield, 4.70 D/molecule);

$^1\text{H}$  NMR (400 MHz,  $\text{CDCl}_3$ ):  $\delta$  7.70 (t,  $J = 7.7$  Hz, 2H), 7.61 (d,  $J = 7.7$  Hz, 1H), 7.37 (d,  $J = 9.0$  Hz, 1H), 7.20 – 7.09 (m, 2H), 6.70 (s, 0.29H), 4.94 (s, 0.12H), 4.11 (m, 0.47H), 3.91 (s, 3H), 3.10 (s, 2H), 2.95 (s, 1H), 1.68 (s, 0.42H).

$^{13}\text{C}$  NMR (101 MHz,  $\text{CDCl}_3$ ):  $\delta$  172.5, 172.0, 157.7, 136.8, 133.6, 129.4, 129.3, 129.3, 127.8, 127.7, 126.2, 126.2, 125.7, 120.4, 119.2, 119.1, 115.5, 105.7, 55.5, 44.4, 43.7, 32.4, 30.9, 30.8, 21.1 – 20.8(m), 15.0.

**HRMS (ESI):** Calcd. for  $\text{C}_{18}\text{H}_{16}\text{D}_6\text{NO}_2^+$   $[\text{M} + \text{H}]^+$ : 290.2022, found: 290.2009.

**(E)-2-([1,1'-Biphenyl]-4-yl)-N-methyl-N-(prop-1-en-1-yl- $d_5$ )acetamide- $d_2$  (26)**

Following Procedure A, using 24 h instead of 7 h.

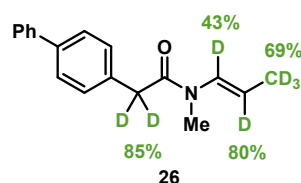

Colourless liquid (27 mg, 50% yield, 5.00 D/molecule);

$^1\text{H}$  NMR (400 MHz,  $\text{CDCl}_3$ ):  $\delta$  7.57 (t,  $J = 8.8$  Hz, 4H), 7.43 (t,  $J = 7.6$  Hz, 2H), 7.33 (m, 3H), 6.72 (s, 0.57H), 5.30 (s, 0.2H), 3.84 (s, 0.3H), 3.12 (s, 2H), 3.08 (s, 1H), 1.69 (s, 0.93H).

$^{13}\text{C}$  NMR (101 MHz,  $\text{CDCl}_3$ ):  $\delta$  169.5, 141.0, 140.0, 133.8, 129.5, 129.2, 128.9, 127.6, 127.6, 127.4, 127.4, 127.2, 106.6, 33.0, 30.5, 15.2.

**HRMS (ESI):** Calcd. for  $\text{C}_{18}\text{H}_{13}\text{D}_7\text{NO}^+$   $[\text{M} + \text{H}]^+$ : 273.1979, found: 273.1983.

**(E)-N-Methyl-N-(prop-1-en-1-yl- $d_5$ )-2-propylpentanamide (27)**

Following Procedure A, using 12 h instead of 7 h.



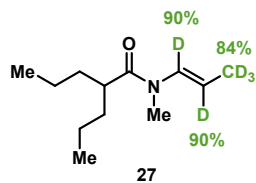

Colourless liquid (25 mg, 61% yield, 4.32 D/molecule);

$^1\text{H NMR}$  (400 MHz,  $\text{CDCl}_3$ ):  $\delta$  6.75 (s, 0.1H), 5.00 (s, 0.1H), 3.12 (s, 1H), 3.08 (s, 2H), 2.91 – 2.75 (m, 1H), 1.72 – 1.61 (m, 2.48H), 1.45 – 1.37 (m, 2H), 1.30 – 1.20 (m, 4H), 0.88 (t,  $J = 7.3$  Hz, 6H).

$^{13}\text{C NMR}$  (101 MHz,  $\text{CDCl}_3$ ):  $\delta$  175.0, 129.1, 107.0, 41.3, 35.1, 32.4, 30.4, 20.7, 14.3.

**HRMS (ESI)**: Calcd. for  $\text{C}_{12}\text{H}_{19}\text{D}_5\text{NO}^+$  [ $\text{M} + \text{H}$ ] $^+$ : 203.2166, found: 203.2167.

**(*R,E*)-5-(1,2-Dithiolan-3-yl)-*N*-methyl-*N*-(prop-1-en-1-yl-*d*<sub>5</sub>)pentanamide-2,2-*d*<sub>2</sub> (28)**

Following Procedure A, using 12 h instead of 7 h.

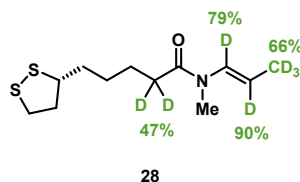

Colourless liquid (25 mg, 48% yield, 4.61 D/molecule);

$^1\text{H NMR}$  (400 MHz,  $\text{CDCl}_3$ ):  $\delta$  6.61 (s, 0.21H), 5.00 (s, 0.1H), 3.64 – 3.51 (m, 1H), 3.22 – 3.09 (m, 2H), 3.06 (s, 3H), 2.45 (m, 2H), 1.92 (m, 1.06H), 1.69 (m, 5.02H), 1.54 – 1.44 (m, 2H).

$^{13}\text{C NMR}$  (101 MHz,  $\text{CDCl}_3$ ):  $\delta$  171.2, 128.9, 106.7, 56.5, 40.4, 38.6, 34.9, 34.0 – 33.4(m), 29.9, 29.1, 24.8 – 24.7(m), 15.4.

**HRMS (ESI)**: Calcd. for  $\text{C}_{12}\text{H}_{15}\text{D}_7\text{NOS}_2^+$  [ $\text{M} + \text{H}$ ] $^+$ : 267.1577, found: 267.1573.

**(4*R*)-4-((3*R*,7*R*,8*R*,9*S*,10*S*,13*R*,14*S*,17*R*)-3,7-Dihydroxy-10,13-dimethylhexadecahydro-1*H*-cyclopenta[*a*]phenanthren-17-yl)-*N*-methyl-*N*-((*E*)-prop-1-en-1-yl-*d*<sub>5</sub>)pentanamide-2,2-*d*<sub>2</sub> (29)**

Following Procedure A, using 18 h instead of 7 h.

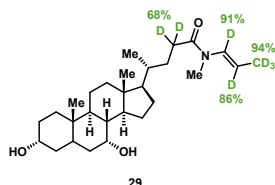

Colourless liquid (42 mg, 47% yield, 5.95 D/molecule);

$^1\text{H NMR}$  (400 MHz,  $\text{CDCl}_3$ ):  $\delta$  6.63 (s, 0.09H), 4.99 (s, 0.14H), 3.85 (s, 1H), 3.46 (s, 1H), 3.06 (s, 2H), 2.80 (s, 1H), 2.48 – 2.28 (m, 0.64H), 2.20 (q,  $J = 12.4$  Hz, 1H), 2.02 – 1.76 (m, 6.18H), 1.74 – 1.56 (m, 4H), 1.54 – 1.08 (m, 15H), 0.96 (d,  $J = 7.0$  Hz, 3H), 0.90 (s, 3H), 0.66 (d,  $J = 4.5$  Hz, 3H).

$^{13}\text{C}$  NMR (101 MHz,  $\text{CDCl}_3$ ):  $\delta$  172.0, 171.7, 132.9, 106.3, 71.8, 68.3, 55.9, 55.8, 50.4, 42.7, 41.6, 39.8, 39.7, 39.4, 35.5, 35.4, 35.1, 34.7, 32.8, 31.0, 30.7, 29.8, 28.2, 23.7, 22.8, 20.6, 18.6, 18.5, 15.1 – 14.7(m), 14.2, 11.8.

**HRMS (ESI):** Calcd. for  $\text{C}_{28}\text{H}_{41}\text{D}_7\text{NO}_3^+$   $[\text{M} + \text{H}]^+$ : 453.4068, found: 453.4050.

**(E)-N-(2-(5-Methoxy-1-methyl-1H-indol-3-yl)ethyl)-N-(prop-1-en-1-yl- $d_5$ )acetamide- $d_3$  (30)**

Following Procedure A, using 11.5 h instead of 7 h.

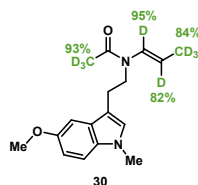

Yellow liquid (36 mg, 62% yield, 7.08 D/molecule);

$^1\text{H}$  NMR (400 MHz,  $\text{CDCl}_3$ ):  $\delta$  7.18 (m, 1.6H), 7.03 – 6.79 (m, 2.4H), 6.48 (s, 0.05H), 5.16 (s, 0.18H), 3.88 (s, 3H), 3.84 (m, 1H), 3.75 (m, 1H), 3.72 (s, 3H), 2.99 – 2.93 (m, 2H), 2.05 (m, 0.21H), 1.72 (s, 0.48H).

$^{13}\text{C}$  NMR (101 MHz,  $\text{CDCl}_3$ ):  $\delta$  168.8, 154.0, 153.8, 132.4, 128.2, 127.9, 127.6, 127.2, 111.9, 111.3, 110.3, 110.0, 107.2, 100.8, 100.5, 56.0, 46.4, 43.8, 32.9, 32.8, 23.2, 22.7, 15.4 – 14.8(m).

**HRMS (ESI):** Calcd. for  $\text{C}_{17}\text{H}_{15}\text{D}_8\text{N}_2\text{O}_2^+$   $[\text{M} + \text{H}]^+$ : 295.2256, found: 295.2262.

**(E)-2-(Diethylamino)-N-(2,6-dimethylphenyl)-N-(prop-1-en-1-yl- $d_5$ )acetamide- $d_2$  (31)**

Following Procedure A, using 11h instead of 7 h.

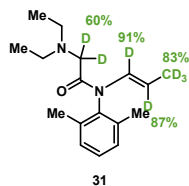

Colourless liquid (28 mg, 50% yield, 5.47 D/molecule);

$^1\text{H}$  NMR (400 MHz,  $\text{CDCl}_3$ ):  $\delta$  7.20 (m, 1H), 7.15 – 7.07 (m, 2H), 4.98 (s, 0.09H), 4.28 (s, 0.13H), 2.89 – 2.66 (m, 0.8H), 2.54 (q,  $J = 7.2$  Hz, 4H), 2.15 (m, 6H), 1.67 (s, 0.51H), 0.90 (t,  $J = 7.2$  Hz, 6H).

$^{13}\text{C}$  NMR (101 MHz,  $\text{CDCl}_3$ ):  $\delta$  168.5, 136.5, 136.4, 136.3, 129.1, 128.7, 125.7, 106.4, 55.0, 54.9, 54.7, 54.5, 47.5, 17.7, 14.7 – 14.2(m), 12.1.

**HRMS (ESI):** Calcd. for  $\text{C}_{17}\text{H}_{20}\text{D}_7\text{N}_2\text{O}^+$   $[\text{M} + \text{H}]^+$ : 282.2557, found: 282.2547.

**(E)-N-(2,6-Dimethylphenyl)-1-methyl-N-(prop-1-en-1-yl- $d_5$ )piperidine-2-carboxamide (32)**

Following Procedure A, using 12h instead of 7 h.

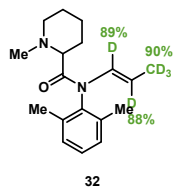

Colourless liquid (29 mg, 50% yield, 4.47 D/molecule);

**<sup>1</sup>H NMR** (400 MHz, CDCl<sub>3</sub>): δ 7.22 (d, *J* = 7.5 Hz, 1H), 7.15 (t, *J* = 7.5 Hz, 2H), 7.08 (s, 0.11H), 4.26 (s, 0.12H), 2.90 (d, *J* = 11.5 Hz, 1H), 2.24 (s, 3H), 2.19 (s, 3H), 2.13 (s, 3H), 2.09 – 2.06 (m, 1H), 1.86 (t, *J* = 11.5 Hz, 1H), 1.71 – 1.52 (m, 5.3H), 1.46 (d, *J* = 13.6 Hz, 1H).

**<sup>13</sup>C NMR** (101 MHz, CDCl<sub>3</sub>): δ 171.2, 170.0, 137.2, 136.5, 136.3, 136.1, 129.2, 129.0, 128.6, 107.6, 66.2, 55.6, 44.7, 44.1, 28.6, 25.4, 25.0, 23.4, 23.3, 18.2, 18.0, 17.9, 17.7, 14.6.

**HRMS (ESI)**: Calcd. for C<sub>18</sub>H<sub>22</sub>D<sub>5</sub>N<sub>2</sub>O<sup>+</sup> [M + H]<sup>+</sup>: 292.2432, found: 292.2437.

**(E)-N-(4-Ethoxyphenyl)-N-(prop-1-en-1-yl-d<sub>5</sub>)acetamide-d<sub>3</sub> (33)**

Following Procedure A, using 11h instead of 7 h.

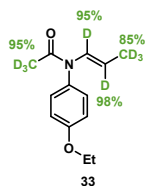

Colourless liquid (23 mg, 51% yield, 7.33 D/molecule);

**<sup>1</sup>H NMR** (400 MHz, CDCl<sub>3</sub>): δ 7.05 (d, *J* = 8.5 Hz, 2H), 6.95 (d, *J* = 8.5 Hz, 2H), 6.57 (s, 0.05H), 4.99 (s, 0.02H), 4.06 (q, *J* = 6.8 Hz, 2H), 1.80 (s, 0.15H), 1.61 (s, 0.45H), 1.44 (t, *J* = 6.8 Hz, 3H).

**<sup>13</sup>C NMR** (101 MHz, CDCl<sub>3</sub>): δ 168.7, 158.8, 132.5, 129.8, 129.1, 115.5, 108.6, 63.8, 29.5, 22.7, 14.8.

**HRMS (ESI)**: Calcd. for C<sub>13</sub>H<sub>10</sub>D<sub>8</sub>NO<sub>2</sub><sup>+</sup> [M + H]<sup>+</sup>: 228.1834, found: 228.1832.

**(E)-N-Benzyl-N-(prop-1-en-1-yl-d<sub>5</sub>)acetamide-d<sub>3</sub> (34)**

Following Procedure A.

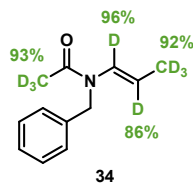

Colourless liquid (25 mg, 64% yield, 7.37 D/molecule);

**<sup>1</sup>H NMR** (400 MHz, CDCl<sub>3</sub>): δ 7.37 – 7.31 (m, 1H), 7.29 (d, *J* = 7.2 Hz, 1H), 7.23 (d, *J* = 7.5 Hz, 1H), 7.17 (d, *J* = 7.5 Hz, 2H), 6.53 (s, 0.04H), 4.98 (s, 0.14H), 4.88 – 4.62 (m, 2H), 2.19 (m, 0.21H), 1.60 (s, 0.24H).

**<sup>13</sup>C NMR** (101 MHz, CDCl<sub>3</sub>): δ 169.2, 137.4, 136.4, 128.9, 128.5, 127.3, 126.9, 126.8, 125.6, 108.5, 106.8, 49.7, 46.6, 21.8 – 21.4(m), 14.9 – 14.71(m).

**HRMS (ESI)**: Calcd. for C<sub>12</sub>H<sub>8</sub>D<sub>8</sub>NO<sup>+</sup> [M + H]<sup>+</sup>: 198.1729, found: 198.1734.

### Procedure for gram-scale experiment (Procedure B):

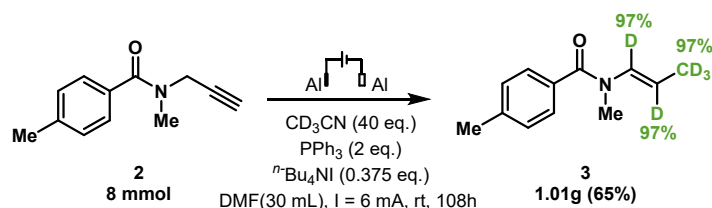

A 50 mL distillation flask equipped with a magnetic stir bar was charged with compound **2** (1.496 g, 8 mmol, 1.0 eq.),  $\text{CD}_3\text{CN}$  (16.7 mL, 40.0 eq.),  $\text{PPh}_3$  (4.197 g, 16 mmol, 2.0 eq.),  $n\text{-Bu}_4\text{NI}$  (1.108 g, 3 mmol, 0.375 eq.) and DMF (30 mL). The flask equipped with aluminium anode ( $d = 5$  mm) and aluminium cathode ( $d = 5$  mm) (the submerged height of the electrode is approximately 3 cm). The resulting solution was stirred and electrolyzed at a constant current of 6 mA (Single Output DC Power Supply: KRP-305DM) for 108 hours at room temperature. The solution was diluted with EtOAc (20 mL) and brine (20 mL), and extracted with EtOAc ( $3 \times 30$  mL). The combined organic layers were washed with brine ( $3 \times 50$  mL), dried over  $\text{Na}_2\text{SO}_4$ , and concentrated *in vacuo*. Purification by flash column chromatography using PE/EtOAc ( $v/v = 10/1$ ) as eluent afforded the desired product **3** (1.01 g, 65%, 4.85 D/molecule).

$^1\text{H NMR}$  (400 MHz,  $\text{CDCl}_3$ ):  $\delta$  7.34 (d,  $J = 8.0$  Hz, 2H), 7.21 (d,  $J = 8.0$  Hz, 2H), 6.53 (s, 0.03H), 5.00 (s, 0.03H), 3.20 (s, 3H), 2.38 (s, 3H), 1.58 (s, 0.09H).

## V Application of Enamides

### *N*,4-Dimethyl-*N*-(propyl-1,2,3,3-*d*<sub>5</sub>)benzamide (35)

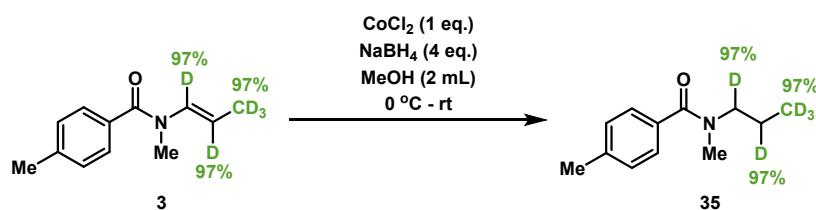

A procedure adopted from literature was used<sup>11</sup>.  $\text{CoCl}_2$  (26 mg, 0.2 mmol, 1.0 eq.) was added to a stirred solution of enamide **3** (39 mg, 0.2 mmol, 1.0 eq.) in MeOH (2 mL) at 0 °C. After 10 min,  $\text{NaBH}_4$  (30 mg, 0.8 mmol, 4.0 eq.) was added to the reaction mixture, and the mixture was allowed to warm to room temperature and stirred for 48 h. The reaction mixture was quenched by slowly adding cold  $\text{H}_2\text{O}$  (20 mL), the solution was diluted with DCM (20 mL) and brine (20 mL), and extracted with DCM (3 × 30 mL). The combined organic layers were washed with brine (3 × 50 mL), dried over  $\text{Na}_2\text{SO}_4$ , and concentrated in vacuo. Purification by flash column chromatography using PE/EtOAc (v/v = 3/1) as eluent afforded the desired product **35** (32 mg, 82%, 4.85 D/molecule) as colourless oil.

<sup>1</sup>H NMR (400 MHz,  $\text{CDCl}_3$ ):  $\delta$  7.27 (d,  $J = 7.4$  Hz, 2H), 7.18 (d,  $J = 7.4$  Hz, 2H), 3.45 (s, 0.43H), 3.18 (s, 0.6H), 3.05 (s, 1.8H), 2.93 (s, 1.2H), 2.36 (s, 3H), 1.64 (s, 0.43H), 1.52 (s, 0.6H), 1.25 (s, 0.09H).

<sup>13</sup>C NMR (101 MHz,  $\text{CDCl}_3$ ):  $\delta$  172.3, 171.5, 139.3, 134.0, 129.0, 127.0, 126.8, 52.6, 48.7, 37.6, 32.7, 21.4.

### Ethyl (*Z*)-4-(*N*,4-dimethylbenzamido)-2,2-difluoro-3-(methyl-*d*<sub>3</sub>)but-3-enoate-4-*d* (36)

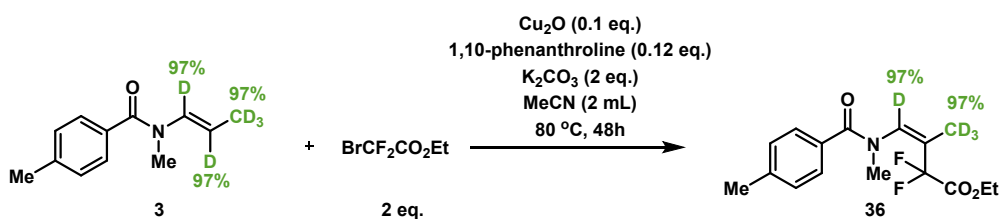

A procedure adopted from literature was used<sup>12</sup>. A screw-cap vial was loaded with enamide **3** (39 mg, 0.2 mmol, 1.0 eq.),  $\text{Cu}_2\text{O}$  (3 mg, 0.02 mmol, 0.1 eq.), 1,10-phenanthroline (4 mg, 0.024 mmol, 0.12 eq.) and  $\text{K}_2\text{CO}_3$  (55 mg, 0.4 mmol, 2 eq.). Anhydrous acetonitrile (2 mL) was added, the mixture was stirred under  $\text{N}_2$  for a few seconds and ethyl bromodifluoroacetate (81 mg, 0.4 mmol, 2.0 eq.) was added. The tube was sealed and placed in an oil bath at 80 °C for 48h. After cooling to room temperature, the solution was diluted with DCM (20 mL) and brine (20 mL), and extracted with DCM (3 × 30 mL). The combined organic layers were washed with brine (3 × 50 mL), dried over  $\text{Na}_2\text{SO}_4$ , and concentrated in vacuo.

Purification by flash column chromatography using PE/EtOAc (v/v = 20/1) as eluent afforded the desired product **36** (31 mg, 49%, 3.88 D/molecule) as colourless oil.

<sup>1</sup>H NMR (400 MHz, CDCl<sub>3</sub>): δ 7.39 (d, *J* = 7.2 Hz, 2H), 7.17 (d, *J* = 7.2 Hz, 2H), 6.72 (s, 0.03H), 4.22 (d, *J* = 6.8 Hz, 2H), 3.26 (s, 3H), 2.37 (s, 3H), 1.67 (s, 0.09H), 1.25 (s, 3H).

<sup>13</sup>C NMR (101 MHz, CDCl<sub>3</sub>): δ 171.3, 163.4, 141.4, 134.2, 132.2, 129.5, 129.2, 128.9, 128.7, 127.1, 127.0, 114.0, 63.2, 36.0, 21.6, 14.6, 14.0.

**(Z)-N,4-Dimethyl-N-(2-phenylprop-1-en-1-yl-1,3,3,3-*d*<sub>4</sub>)benzamide (37)**

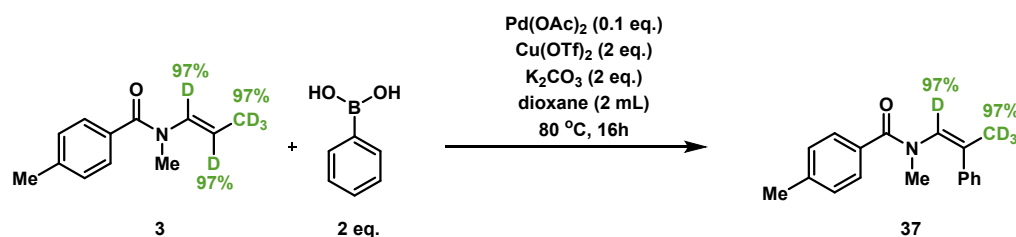

A procedure adopted from literature was used<sup>12</sup>. A screw-cap vial was loaded with enamide **3** (39 mg, 0.2 mmol, 1.0 eq.), Cu(OTf)<sub>2</sub> (145 mg, 0.4 mmol, 2.0 eq.), K<sub>2</sub>CO<sub>3</sub> (55 mg, 0.4 mmol, 2.0 eq.), phenylboronic acid (49 mg, 0.4 mmol, 2.0 eq.). Anhydrous 1,4-dioxane (2 ml) was added, the mixture was stirred under N<sub>2</sub> for a few seconds and Pd(OAc)<sub>2</sub> (5 mg, 0.02 mmol, 0.1 eq.) was added. The tube was sealed and placed in an oil bath at 80 °C for 16h. After cooling to room temperature, the solution was diluted with EtOAc (20 mL) and brine (20 mL), and extracted with EtOAc (3 × 30 mL). The combined organic layers were washed with brine (3 × 50 mL), dried over Na<sub>2</sub>SO<sub>4</sub>, and concentrated in vacuo. Purification by flash column chromatography using PE/EtOAc (v/v = 10/1) as eluent afforded the desired product **37** (15 mg, 27%, 3.88 D/molecule) as colourless oil.

<sup>1</sup>H NMR (400 MHz, CDCl<sub>3</sub>): δ 7.44 (d, *J* = 7.2 Hz, 2H), 7.38 (d, *J* = 7.4 Hz, 4H), 7.32 (d, *J* = 7.4 Hz, 1H), 6.97 (d, *J* = 7.2 Hz, 2H), 6.71 (s, 0.03H), 3.18 (s, 3H), 2.28 (s, 3H), 1.48 (s, 0.09H).

<sup>13</sup>C NMR (101 MHz, CDCl<sub>3</sub>): δ 171.9, 142.5, 140.3, 136.9, 133.2, 129.0, 128.3, 128.1, 127.6, 125.6, 121.5, 35.7, 29.9 – 29.8 (m), 21.5.

**N,4-Dimethyl-N-((1*S*,2*S*)-2-(methyl-*d*<sub>3</sub>)cyclopropyl-1,2-*d*<sub>2</sub>)benzamide (38)**

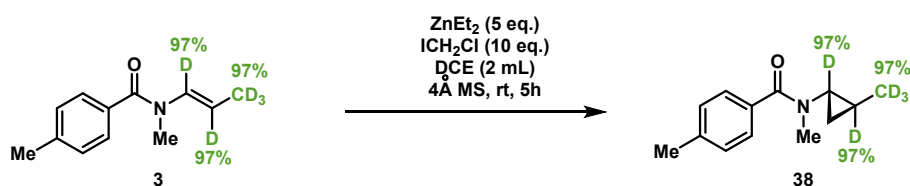

A procedure adopted from literature was used<sup>13</sup>. Molecular sieves (4 Å, 50 mg) and ICH<sub>2</sub>Cl (353 mg, 2

mmol, 10.0 eq.) were added to a solution of the enamide **3** (39 mg, 0.2 mmol, 1.0 eq.) in anhydrous DCE (2 mL), and the resulting mixture was stirred at room temperature for 30 min. A solution of ZnEt<sub>2</sub> (1 mL, 1.0M in hexane, 1 mmol, 5.0 eq.) was then added carefully dropwise. After further stirring at room temperature for 5 h, TLC analysis showed that **2** had been consumed entirely. The reaction mixture was quenched with saturated aqueous NaHCO<sub>3</sub> (5 mL). The solution was diluted with DCM (20 mL) and brine (20 mL), and extracted with DCM (3 × 30 mL). The combined organic layers were washed with brine (3 × 50 mL), dried over Na<sub>2</sub>SO<sub>4</sub>, and concentrated in vacuo. Purification by flash column chromatography using PE/EtOAc (v/v = 3/1) as eluent afforded the desired product **38** (33 mg, 80%, 4.85 D/molecule) as colourless oil.

<sup>1</sup>H NMR (400 MHz, CDCl<sub>3</sub>): δ 7.37 (d, *J* = 7.5 Hz, 2H), 7.19 (d, *J* = 7.5 Hz, 2H), 3.04 (s, 3H), 2.92 (s, 0.03H), 2.37 (s, 3H), 1.89 (s, 0.09H), 1.02 (s, 0.03H), 0.61 (s, 1.3H), 0.35 (s, 0.7H).

<sup>13</sup>C NMR (101 MHz, CDCl<sub>3</sub>): δ 172.9, 139.5, 134.8, 128.8, 127.4, 34.8, 26.87, 26.8, 21.5, 16.6, 16.0.

***N*,4-Dimethyl-*N*-(8-(methyl-*d*<sub>3</sub>)bicyclo[4.2.0]octa-1(6),2,4-trien-7-yl-7,8-*d*<sub>2</sub>)benzamide (39)**

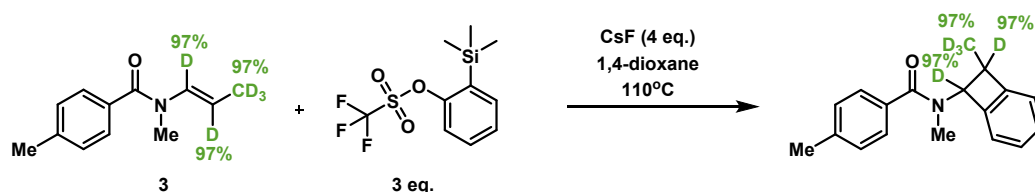

A modified procedure adopted from literature was used<sup>14</sup>. A screw-cap vial was loaded with CsF (122 mg, 0.8 mmol, 4.0 eq.), enamide **3** (39 mg, 0.2 mmol, 1.0 eq.) and anhydrous 1,4-dioxane (2 mL). Then, 2-(trimethylsilyl)phenyl trifluoromethanesulfonate (179 mg, 0.6 mmol, 3.0 eq.) was added dropwise using a gastight syringe. The reaction mixture was heated at 110 °C for 16 h. After cooling to room temperature, the solution was diluted with EtOAc (20 mL) and brine (20 mL), and extracted with EtOAc (3 × 30 mL). The combined organic layers were washed with brine (3 × 50 mL), dried over Na<sub>2</sub>SO<sub>4</sub>, and concentrated in vacuo. Purification by flash column chromatography using PE/EtOAc (v/v = 3/1) as eluent afforded the desired product **39** (27 mg, 50%, 4.85 D/molecule) as colourless oil.

<sup>1</sup>H NMR (400 MHz, CDCl<sub>3</sub>): δ 7.36 (d, *J* = 7.7 Hz, 2H), 7.23 (d, *J* = 12.4 Hz, 2H), 7.18 (d, *J* = 7.7 Hz, 2H), 7.10 (d, *J* = 12.4 Hz, 2H), 4.83 (s, 0.03H), 3.56 (s, 0.03H), 2.86 (s, 3H), 2.33 (s, 3H), 1.38 (s, 0.09H).

<sup>13</sup>C NMR (101 MHz, CDCl<sub>3</sub>): δ 172.2, 142.2, 139.9, 133.5, 129.4, 129.1, 128.7, 128.0, 127.4, 123.2, 122.3, 66.0, 34.3, 29.0, 21.5, 16.1.

**Methyl**                    **8-(*N*,4-dimethylbenzamido)-7-(methyl-*d*<sub>3</sub>)-3-oxo-2-oxabicyclo[2.2.2]oct-5-ene-6-**



### carboxylate-7,8-*d*<sub>2</sub> (**40**)

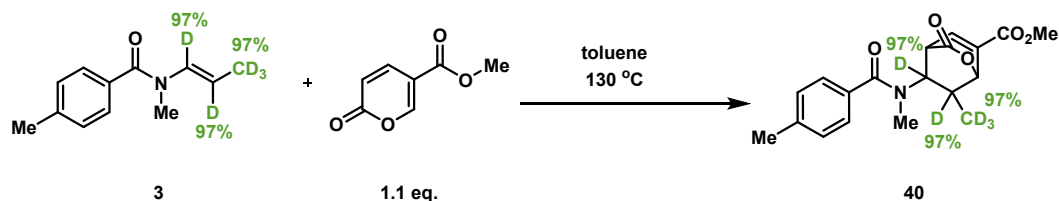

A procedure adopted from literature was used<sup>14</sup>. A screw-cap vial was loaded with methyl coumalate (34 mg, 0.22 mmol, 1.1 eq.), followed by the addition of enamide **3** (39 mg, 0.2 mmol, 1.0 eq.) dissolved in toluene (1 mL). The mixture was heated at 130 °C for 48 h. After cooling to room temperature, the solution was diluted with EtOAc (20 mL) and brine (20 mL), and extracted with EtOAc (3 × 30 mL). The combined organic layers were washed with brine (3 × 50 mL), dried over Na<sub>2</sub>SO<sub>4</sub>, and concentrated in vacuo. Purification by flash column chromatography using PE/EtOAc (v/v = 3/1) as eluent afforded the desired product **40** (24 mg, 35%, 4.85 D/molecule) as yellow oil.

<sup>1</sup>H NMR (400 MHz, CDCl<sub>3</sub>): δ 7.53 (s, 1H), 7.31 (m, 2H), 7.25 (d, *J* = 7.7 Hz, 2H), 5.52 (s, 1H), 4.15 (s, 0.03H), 3.86 (s, 3H), 3.69 (s, 1H), 2.97 (s, 3H), 2.56 (s, 0.03H), 2.42 (s, 3H), 2.08 (s, 0.09H).

<sup>13</sup>C NMR (101 MHz, CDCl<sub>3</sub>): δ 186.9, 173.3, 163.1, 140.9, 140.5, 135.5, 132.9, 129.4, 127.1, 78.2, 76.8, 52.6, 47.8, 21.6, 17.2.

### Ethyl 2-(4-chlorophenyl)-4-(*N*,4-dimethylbenzamido)-3-(methyl-*d*<sub>3</sub>)quinoline-6-carboxylate (**41**)

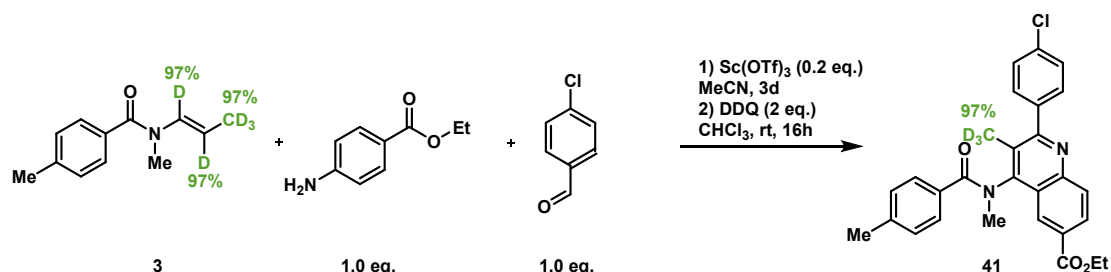

A procedure adopted from literature was used<sup>14</sup>. Ethyl 4-aminobenzoate (50 mg, 0.3 mmol, 1.0 eq.) and *p*-chlorobenzaldehyde (42 mg, 0.3 mmol, 1.0 eq.) were dissolved in anhydrous MeCN (1 mL) in an oven-dried round bottom flask. Then, molecular sieves (4 Å, 50 mg) were added, followed by Sc(OTf)<sub>3</sub> (30 mg, 0.06 mmol, 0.2 eq.). The resulting mixture was stirred at room temperature for 5 min. Then, the enamide **3** (58 mg, 0.3 mmol, 1.0 eq.) dissolved in MeCN (1 mL) was added. The mixture was stirred for 3 d at room temperature. Then, the reaction was stopped by the addition of aqueous saturated solution of NaHCO<sub>3</sub> (5 mL) and filtered. The aqueous phase was extracted with EtOAc (3 × 10 mL). The combined organic phases were dried over anhydrous Na<sub>2</sub>SO<sub>4</sub> and the solvent was removed under reduced pressure. The crude material was used directly in the next oxidative step and was dissolved in

anhydrous  $\text{CHCl}_3$  (2 mL). Next, DDQ (136 mg, 0.6 mmol, 2.0 eq.) was added. The reaction was stirred for 16 h at room temperature. The solution was diluted with DCM (20 mL) and brine (20 mL), and extracted with DCM ( $3 \times 30$  mL). The combined organic layers were washed with brine ( $3 \times 50$  mL), dried over  $\text{Na}_2\text{SO}_4$ , and concentrated in vacuo. Purification by flash column chromatography using PE/EtOAc ( $v/v = 2/1$ ) as eluent afforded the desired product **41** (43 mg, 30%, 2.91 D/molecule) as yellow oil.

**$^1\text{H}$  NMR** (400 MHz,  $\text{CDCl}_3$ ):  $\delta$  8.76 (s, 1H), 8.35 (d,  $J = 8.0$  Hz, 1H), 8.24 (d,  $J = 8.0$  Hz, 1H), 7.42 (d,  $J = 7.7$  Hz, 2H), 7.27 (d,  $J = 7.7$  Hz, 2H), 7.15 (d,  $J = 7.7$  Hz, 2H), 6.86 (d,  $J = 7.7$  Hz, 2H), 4.51 (d,  $J = 7.0$  Hz, 2H), 3.51 (s, 3H), 2.21 (s, 3H), 2.10 (s, 0.09H), 1.49 (t,  $J = 7.0$  Hz, 3H).

**$^{13}\text{C}$  NMR** (101 MHz,  $\text{CDCl}_3$ ):  $\delta$  171.6, 166.0, 162.8, 149.2, 141.1, 138.3, 135.3, 132.2, 130.6, 130.5, 130.3, 129.9, 129.4, 128.8, 128.6, 127.8, 127.5, 125.6, 124.0, 61.8, 37.3, 21.4, 16.2, 15.8, 15.4, 14.6.

## V Mechanism Research

### Control Experiment

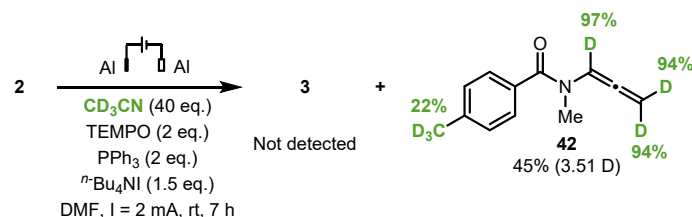

A 10 mL distillation flask equipped with a magnetic stir bar was charged with compound **2** (37 mg, 0.2 mmol, 1.0 eq.), CD<sub>3</sub>CN (0.42 mL, 40.0 eq.), TEMPO (63 mg, 0.4 mmol, 2.0 eq.), PPh<sub>3</sub> (105 mg, 0.4 mmol, 2.0 eq.), <sup>n</sup>Bu<sub>4</sub>NI (111 mg, 0.3 mmol, 1.5 eq.) and DMF (3 mL). The flask equipped with aluminium anode (d = 5 mm) and aluminium cathode (d = 5 mm). The resulting solution was stirred and electrolyzed at a constant current of 2 mA (Single Output DC Power Supply: KRP-305DM) for 7 h at room temperature. The solution was diluted with EtOAc (5 mL) and brine (20 mL), and extracted with EtOAc (3 × 20 mL). The combined organic layers were washed with brine (3 × 20 mL), dried over Na<sub>2</sub>SO<sub>4</sub>, and concentrated *in vacuo*. Purification by flash column chromatography using PE/EtOAc (v/v = 10/1) as eluent afforded the product **42** (17 mg, 45%, 3.51 D/molecule) as colourless oil.

<sup>1</sup>H NMR (400 MHz, CDCl<sub>3</sub>): δ 7.39 (s, 2H), 7.23 (d, *J* = 7.3 Hz, 2H), 6.78 (s, 0.03H), 5.38 (s, 0.12H), 3.15 (s, 1H), 3.02 (s, 1H), 2.39 (s, 2.34H).

<sup>13</sup>C NMR (101 MHz, CDCl<sub>3</sub>): δ 169.7, 140.4, 131.8, 129.0, 128.0, 127.5, 103.6, 86.7, 35.7, 31.3, 21.4.

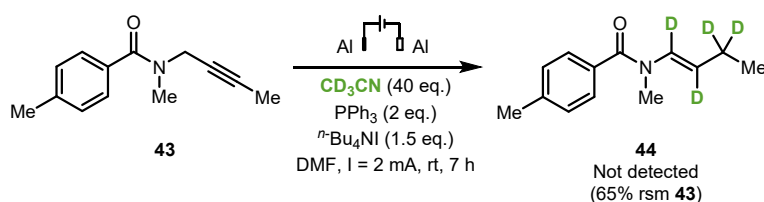

A 10 mL distillation flask equipped with a magnetic stir bar was charged with compound **43** (40 mg, 0.2 mmol, 1.0 eq.), CD<sub>3</sub>CN (0.42 mL, 40.0 eq.), PPh<sub>3</sub> (105 mg, 0.4 mmol, 2.0 eq.), <sup>n</sup>Bu<sub>4</sub>NI (111 mg, 0.3 mmol, 1.5 eq.) and DMF (3 mL). The flask equipped with aluminium anode (d = 5 mm) and aluminium cathode (d = 5 mm). The resulting solution was stirred and electrolyzed at a constant current of 2 mA (Single Output DC Power Supply: KRP-305DM) for 7 h at room temperature. The solution was diluted with EtOAc (5 mL) and brine (20 mL), and extracted with EtOAc (3 × 20 mL). The combined organic layers were washed with brine (3 × 20 mL), dried over Na<sub>2</sub>SO<sub>4</sub>, and concentrated *in vacuo*. Purification by flash column chromatography using PE/EtOAc (v/v = 10/1) as eluent afforded the product **43** (26

mg, 65%) as colourless oil.

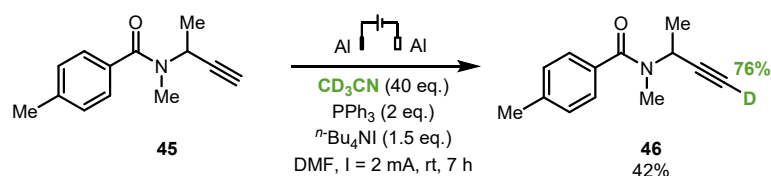

A 10 mL distillation flask equipped with a magnetic stir bar was charged with compound **45** (40 mg, 0.2 mmol, 1.0 eq.), CD<sub>3</sub>CN (0.42 mL, 40.0 eq.), PPh<sub>3</sub> (105 mg, 0.4 mmol, 2.0 eq.), *n*-Bu<sub>4</sub>NI (111 mg, 0.3 mmol, 1.5 eq.) and DMF (3 mL). The flask equipped with aluminium anode (d = 5 mm) and aluminium cathode (d = 5 mm). The resulting solution was stirred and electrolyzed at a constant current of 2 mA (Single Output DC Power Supply: KRP-305DM) for 7 h at room temperature. The solution was diluted with EtOAc (5 mL) and brine (20 mL), and extracted with EtOAc (3 × 20 mL). The combined organic layers were washed with brine (3 × 20 mL), dried over Na<sub>2</sub>SO<sub>4</sub>, and concentrated *in vacuo*. Purification by flash column chromatography using PE/EtOAc (v/v = 10/1) as eluent afforded the product **46** (17 mg, 42%, 0.76 D/molecule) as colourless oil.

<sup>1</sup>H NMR (400 MHz, CDCl<sub>3</sub>): δ 7.34 (d, *J* = 7.5 Hz, 2H), 7.21 (d, *J* = 7.5 Hz, 2H), 5.70 (s, 0.5H), 4.70 (s, 0.5H), 3.03 (s, 3H), 2.38 (s, 3H), 2.35 (s, 0.24H), 1.42 (s, 3H).

<sup>13</sup>C NMR (101 MHz, CDCl<sub>3</sub>): δ 171.4, 140.1, 133.1, 129.2, 127.2, 72.1 71.8, 66.9, 47.0, 41.7, 32.5, 28.1, 21.5, 19.3.

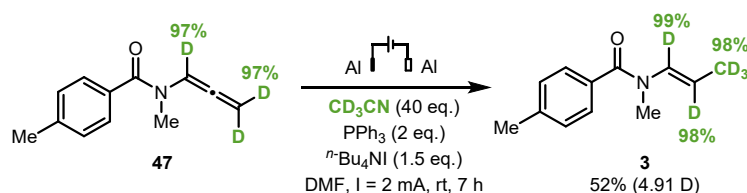

A 10 mL distillation flask equipped with a magnetic stir bar was charged with compound **47** (38 mg, 0.2 mmol, 1.0 eq.), CD<sub>3</sub>CN (0.42 mL, 40.0 eq.), PPh<sub>3</sub> (105 mg, 0.4 mmol, 2.0 eq.), *n*-Bu<sub>4</sub>NI (111 mg, 0.3 mmol, 1.5 eq.) and DMF (3 mL). The flask equipped with aluminium anode (d = 5 mm) and aluminium cathode (d = 5 mm). The resulting solution was stirred and electrolyzed at a constant current of 2 mA (Single Output DC Power Supply: KRP-305DM) for 7 h at room temperature. The solution was diluted with EtOAc (5 mL) and brine (20 mL), and extracted with EtOAc (3 × 20 mL). The combined organic layers were washed with brine (3 × 20 mL), dried over Na<sub>2</sub>SO<sub>4</sub>, and concentrated *in vacuo*. Purification by flash column chromatography using PE/EtOAc (v/v = 10/1) as eluent afforded the product **3** (20 mg, 52%, 4.91 D/molecule) as colourless oil.

**<sup>1</sup>H NMR** (400 MHz, CDCl<sub>3</sub>): δ 7.34 (d, *J* = 8.0 Hz, 2H), 7.21 (d, *J* = 8.0 Hz, 2H), 6.53 (s, 0.01H), 5.00 (s, 0.02H), 3.20 (s, 3H), 2.38 (s, 3H), 1.58 (s, 0.06H).

## pH Detection

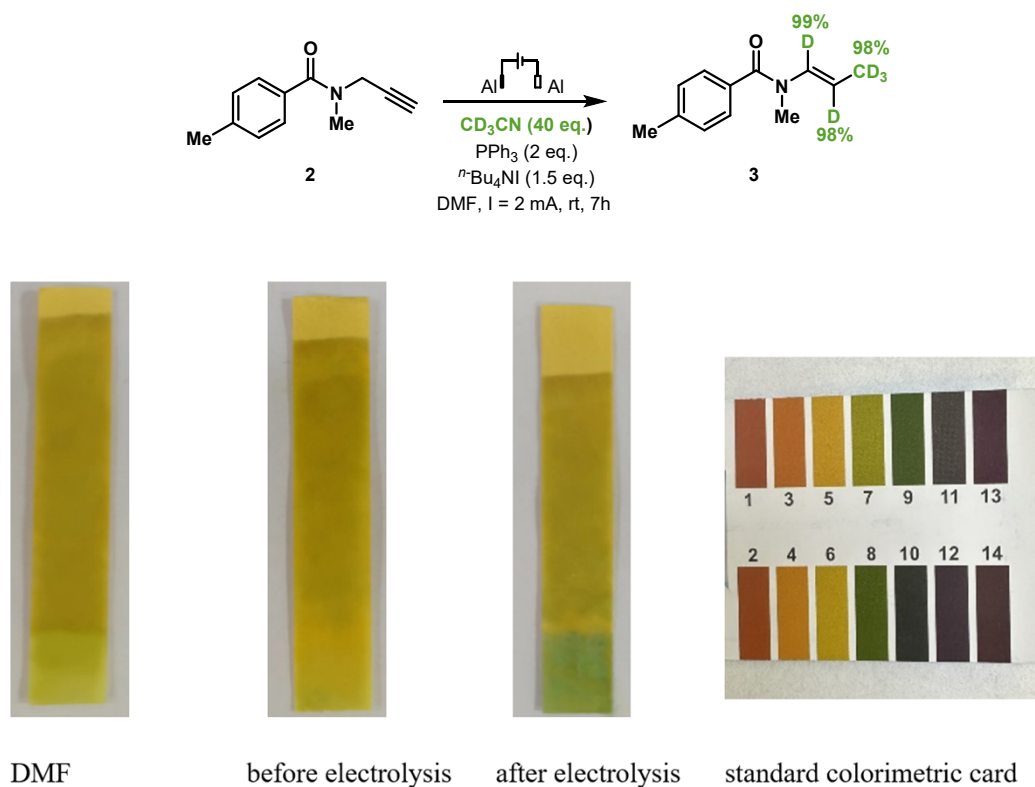

**Figure S4:** pH Detection

- (1) The pH test paper was moistened with water and anhydrous DMF was dropped on it. The color did not change obviously.
- (2) The pH test paper was moistened with water and the reaction mixture before electrolysis was dropped on the pH test paper. The color did not change obviously.
- (3) After the reaction was completed under standard conditions, the pH test paper was moistened with water and the mixture was dropped on it. The color did not change obviously.

## Cyclic Voltammetry Experiment

Cyclic voltammetry was carried out in a glass cell with CHI760E electrochemical workstation. Cyclic voltammetry of compound **2** at a scan rate of  $100 \text{ mV}\cdot\text{s}^{-1}$ . The electrochemical experiments were performed in a three-compartment cell fitted with a glassy carbon as the working electrode, a saturated calomel electrode (SCE) as the reference electrode, and a graphite rod (diameter is 5 mm) as the counter electrode.

Electrolyte:  $0.1 \text{ M } n\text{-Bu}_4\text{NI}$  in DMF; Concentration of sample:  $0.01 \text{ M}$ .

Discussion: The reduction potentials of the substrate **2** is  $-2.339 \text{ V}$  and  $-2.421 \text{ V}$  (Figure S5, red line). The reduction potentials of the **47** is  $-2.418 \text{ V}$  (Figure S5, blue line), the results indicated that **47** is an intermediate reduced from **2**. In the mixture of **2** with  $\text{PPh}_3$ , the reduction potential of **2** did not change significantly (Figure S6, green line). In the mixture of **2** with  $\text{O=PPh}_3$ , the reduction potential of **2** did not change significantly (Figure S7, green line). These results showed that  $\text{PPh}_3$  and  $\text{O=PPh}_3$  did not change the reduction potential of **2** indicating that there is no interaction between  $\text{PPh}_3$  or  $\text{O=PPh}_3$  and substrate **2** in the electrochemical system. We observed that the reaction voltage range of model reaction was  $2.6\text{-}2.7 \text{ V}$  without adding  $\text{PPh}_3$ , and the voltage decreased to  $2.0\text{-}2.1 \text{ V}$  under standard conditions (with  $\text{PPh}_3$ ). In addition, we obtained  $\text{O=PPh}_3$  in 23% yield from model reaction under standard conditions. Based on these results, we speculated that  $\text{PPh}_3$  is oxidized in the electrochemical system, reducing the reaction voltage to make the reaction condition milder than the model reaction without adding  $\text{PPh}_3$ .

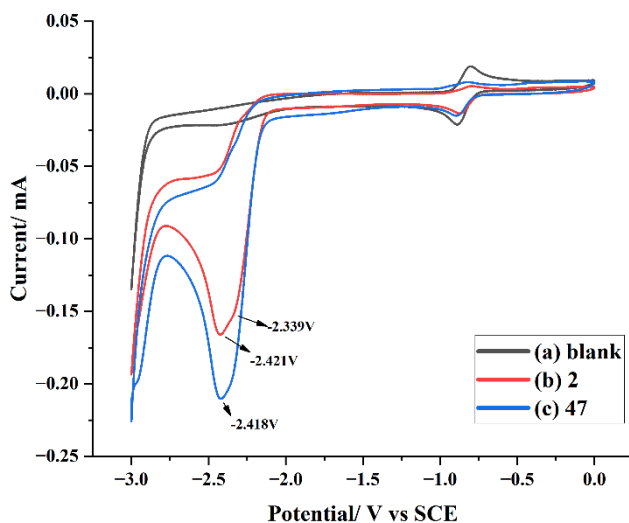

**Figure S5:** Cyclic voltammograms obtained in  $0.1 \text{ M } n\text{-Bu}_4\text{NI}/\text{DMF}$  using glass carbon (diameter, 3 mm) as the working electrode, graphite rod, and saturated calomel electrode (SCE) as the auxiliary and reference electrode, respectively, at a scan rate of  $100 \text{ mV}\cdot\text{s}^{-1}$ : (a) blank, (b)  $10 \text{ mM } \mathbf{2}$ , (c)  $10 \text{ mM } \mathbf{47}$ .

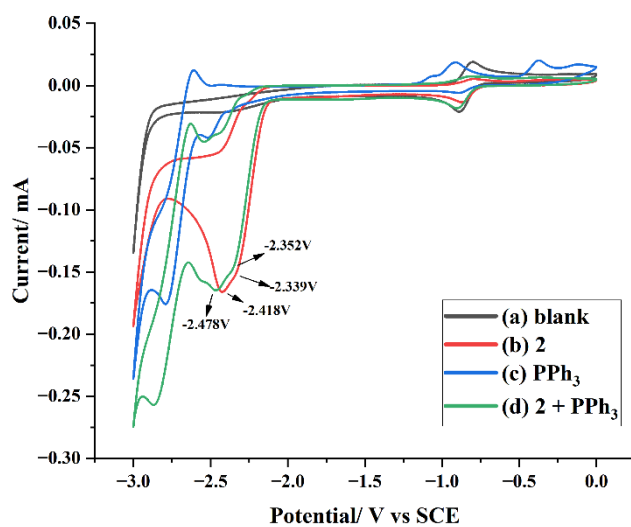

**Figure S6:** Cyclic voltammograms obtained in 0.1 M  $n\text{-Bu}_4\text{NI}/\text{DMF}$  using glass carbon (diameter, 3 mm) as the working electrode, graphite rod, and saturated calomel electrode (SCE) as the auxiliary and reference electrode, respectively, at a scan rate of  $100\text{ mV}\cdot\text{s}^{-1}$ : (a) blank, (b) 10 mM **2**, (c) 10 mM  $\text{PPh}_3$ , (d) 10 mM **2** + 10 mM  $\text{PPh}_3$ .

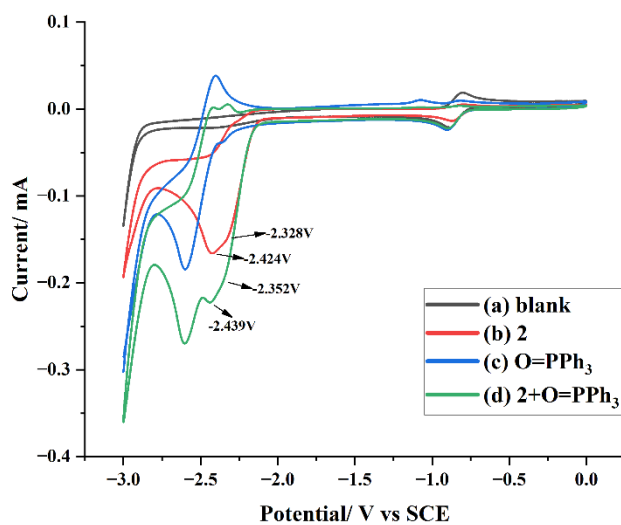

**Figure S7:** Cyclic voltammograms obtained in 0.1 M  $n\text{-Bu}_4\text{NI}/\text{DMF}$  using glass carbon (diameter, 3 mm) as the working electrode, graphite rod, and saturated calomel electrode (SCE) as the auxiliary and reference electrode, respectively, at a scan rate of  $100\text{ mV}\cdot\text{s}^{-1}$ : (a) blank, (b) 10 mM **2**, (c) 10 mM  $\text{O=PPh}_3$ , (d) 10 mM **2** + 10 mM  $\text{O=PPh}_3$ .



## VI References

- 1 S. Ning, L. Zheng, Y. Bai, S. Wang, S. Wang, L. Shi, Q. Gao, X. Che, Z. Zhang and J. Xiang, *Tetrahedron*, 2021, **102**, 132535.
- 2 Q. Gao, L. Zheng, S. Ning, L. Shi, C. Wu, M. Liu and J. Xiang, *Org. Chem. Front.* 2023, **10**, 6212-6218.
- 3 R. L. Melen, M. M. Hansmann, A. J. Lough, A. S. K. Hashmi and D. W. Stephan, *Chem. Eur. J.* 2013, **19**, 11928-11938.
- 4 M. Gruit, D. Michalik, K. Krueger, A. Spannenberg, A. Tillack, A. Pews-Davtyan and M. Beller, *Tetrahedron* 2010, **66**, 3341-3352.
- 5 E. E. Freeman, R. Jackson, J. Luo, R. Somwaru, A. A. Sons, A. Bean, R. N. Buckle and R. J. Herr, *J. Org. Chem.* 2023, **88**, 2589-2598.
- 6 A. Walser, T. Flynn, C. Mason, H. Crowley, C. Maresca, B. Yaremko and M. O'Donnell, *J. Med. Chem.* 1991, **34**, 1209-1221.
- 7 B. M. Nilsson, H. M. Vargas, B. Ringdahl and U. Hacksell, *J. Med. Chem.* 1992, **35**, 285-294.
- 8 M. Hajiloo Shayegan, Z.-Y. Li and X. Cui, *Chem. Eur. J.* 2022, **28**, e202103402.
- 9 M. Chiminelli, A. Serafino, D. Ruggeri, L. Marchiò, F. Bigi, R. Maggi, M. Malacria and G. Maestri, *Angew. Chem. Int. Ed.* 2023, **62**, e202216817.
10. Y. Zhu, P. Liu, D. Wang, J. Zhang, J. Cheng, Y. Ma, X. Zou and H. Yang, *Chin. J. Chem.* 2013, **31**, 173-181.
11. A. Karmakar, S. Ramalingam, M. Basha, G. K. Indasi, M. Belema, N. A. Meanwell, T. G. M. Dhar, R. Rampulla, A. Mathur, A. Gupta and A. K. Gupta, *Synthesis* 2020, **52**, 441-449.
12. T. Zhu, S. Xie, P. Rojsitthisak and J. Wu, *Org. Biomol. Chem.* 2020, **18**, 1504-1521.
13. G. Masson, T. Courant and G. Dagousset, *Synthesis* 2015, **47**, 1799-1856
14. P. Spieß, M. Berger, D. Kaiser and N. Maulide, *J. Am. Chem. Soc.* 2021, **143**, 10524-10529

## VII. Spectra

$^1\text{H NMR}$  (400 MHz,  $\text{CDCl}_3$ ):

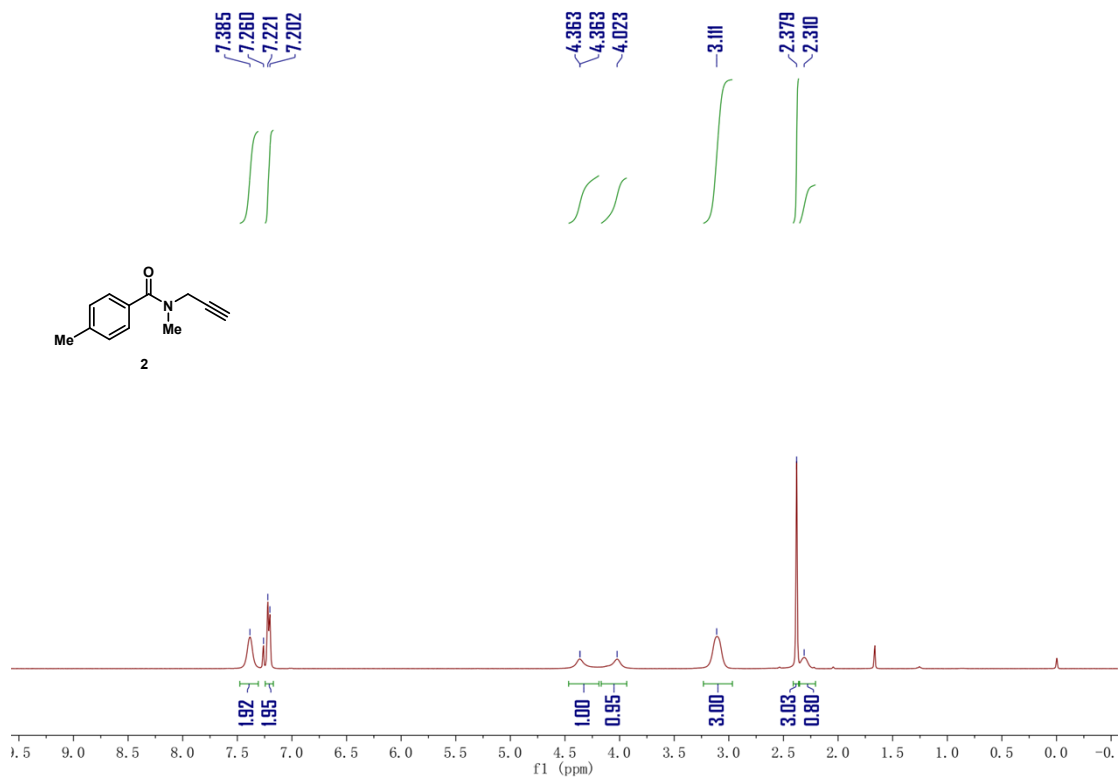

$^1\text{H NMR}$  (400 MHz,  $\text{CDCl}_3$ ):

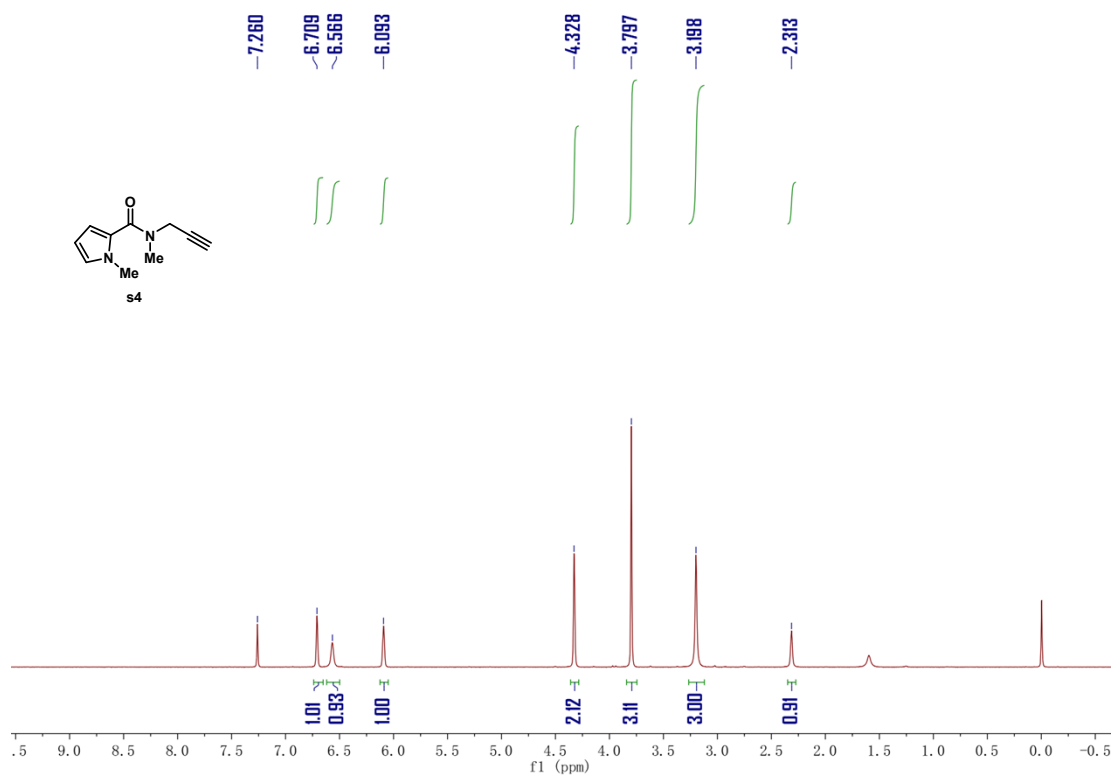

**<sup>1</sup>H NMR (400 MHz, CDCl<sub>3</sub>):**

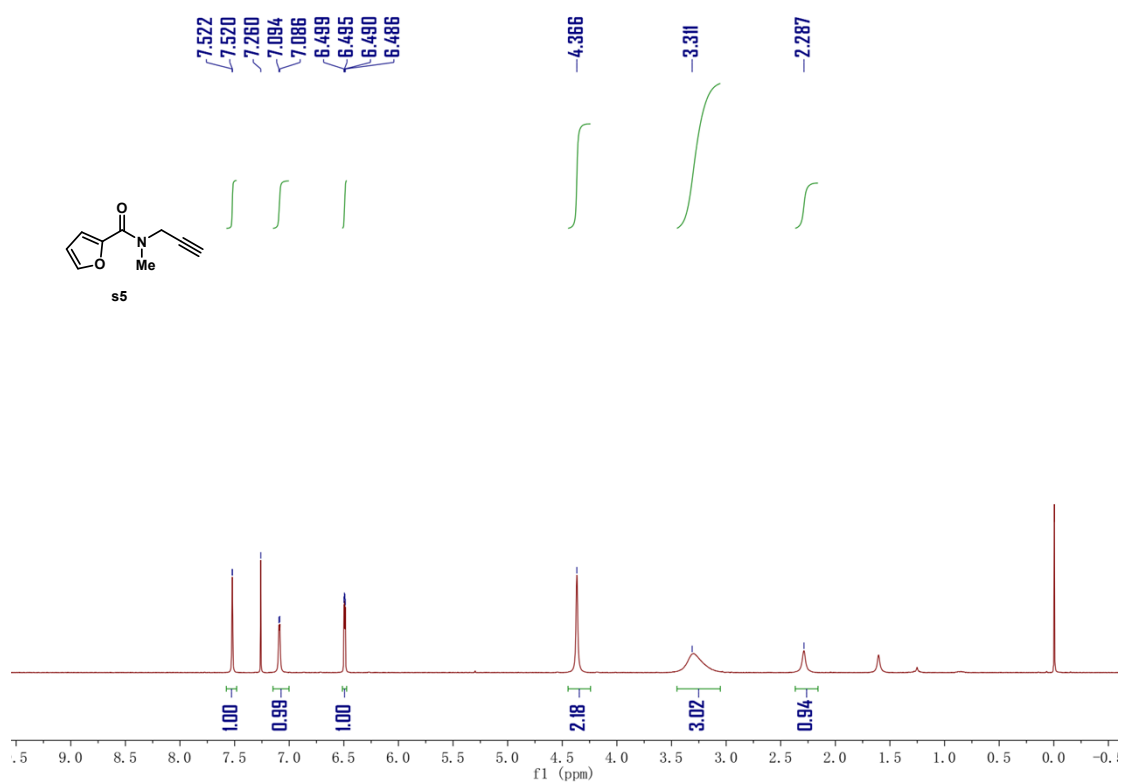

**<sup>1</sup>H NMR (400 MHz, CDCl<sub>3</sub>):**

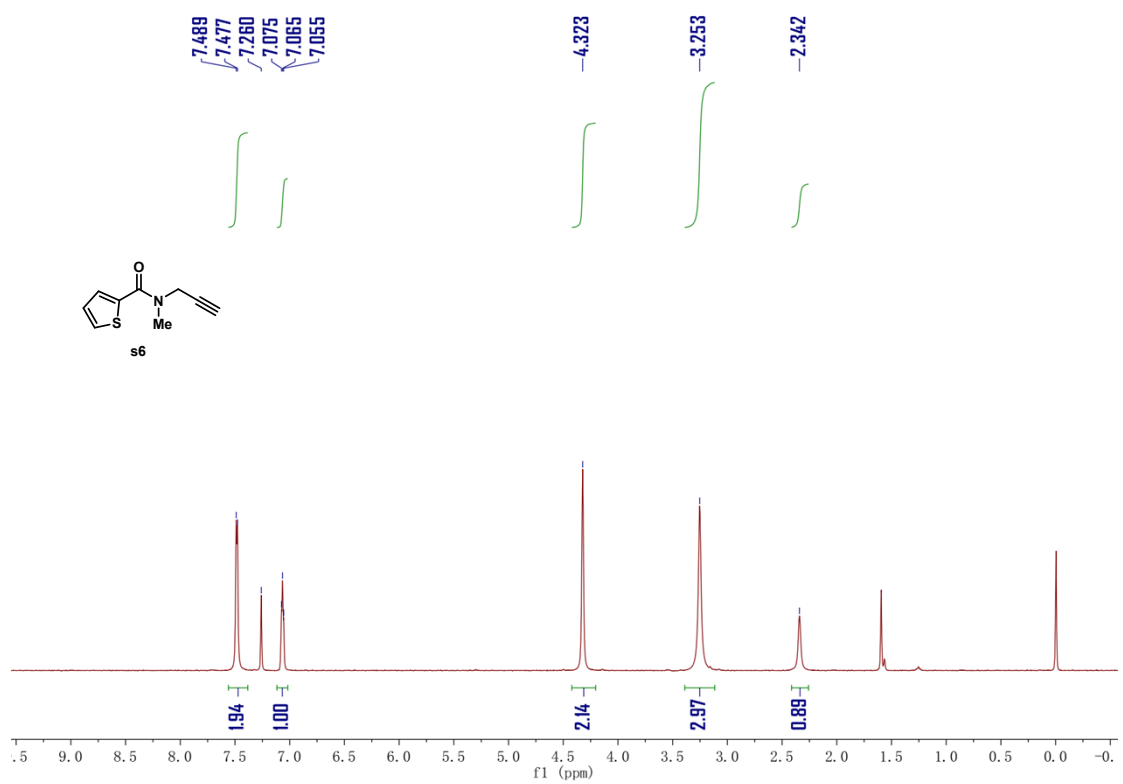

**<sup>13</sup>C NMR (101 MHz, CDCl<sub>3</sub>):**

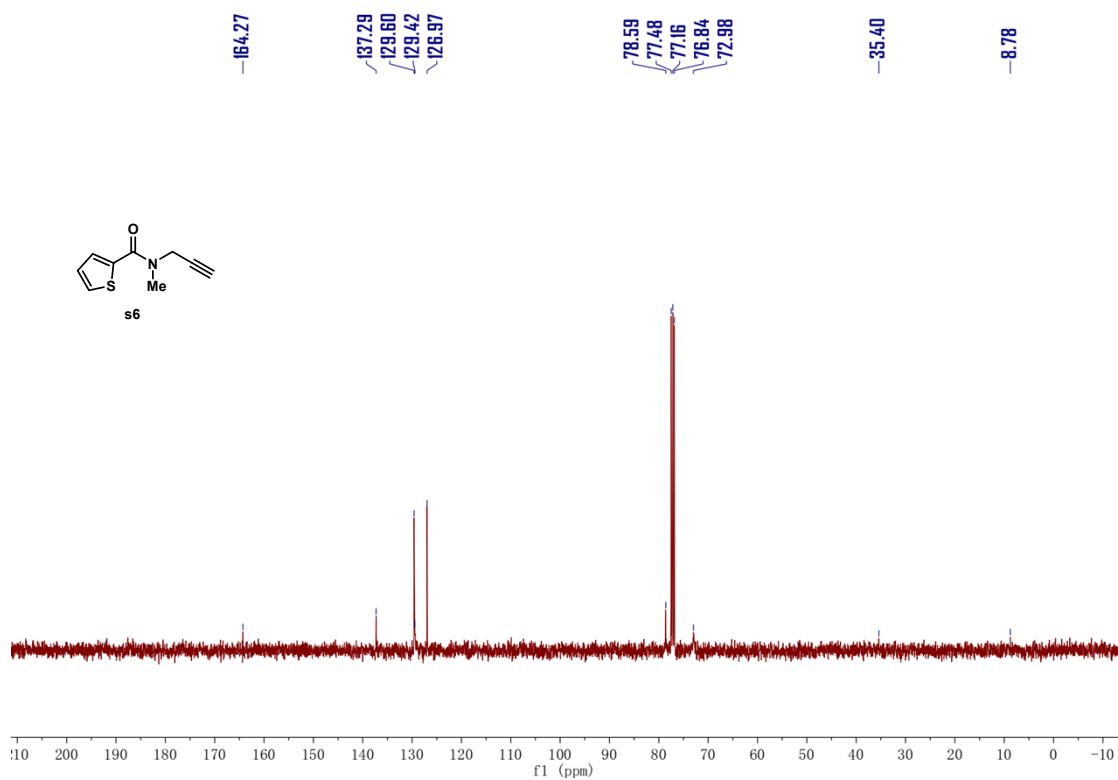

**<sup>1</sup>H NMR (400 MHz, CDCl<sub>3</sub>):**

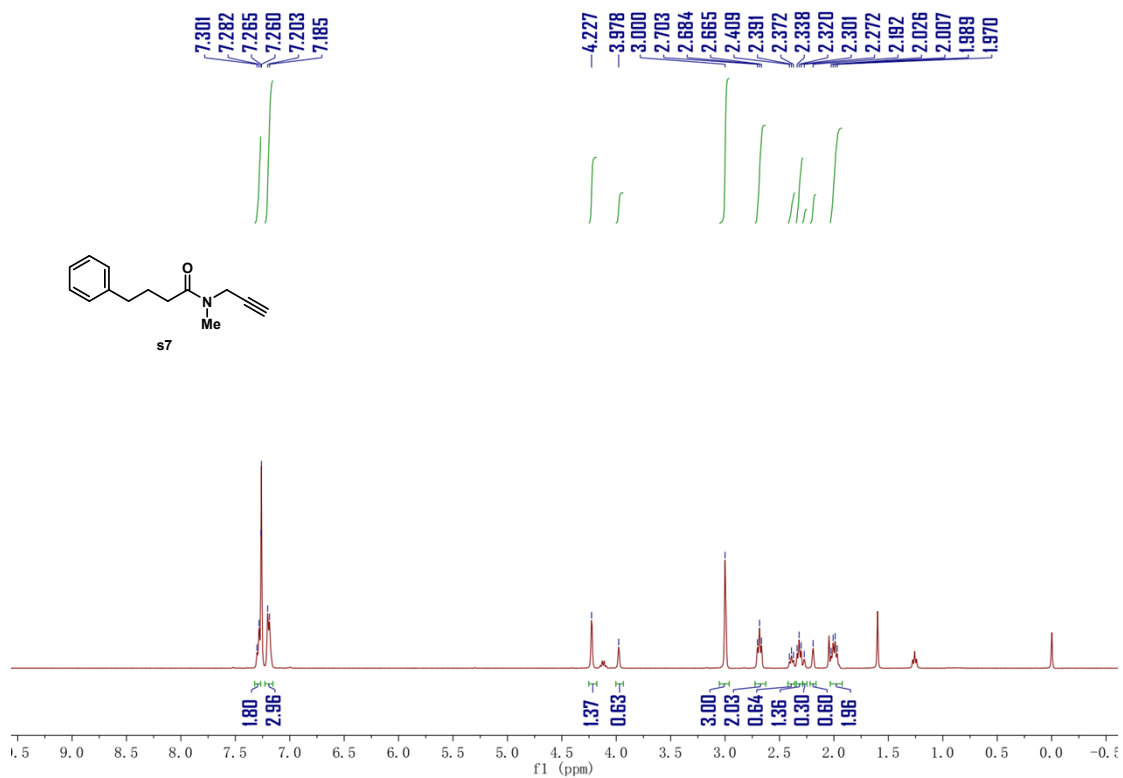

**<sup>13</sup>C NMR (101 MHz, CDCl<sub>3</sub>):**

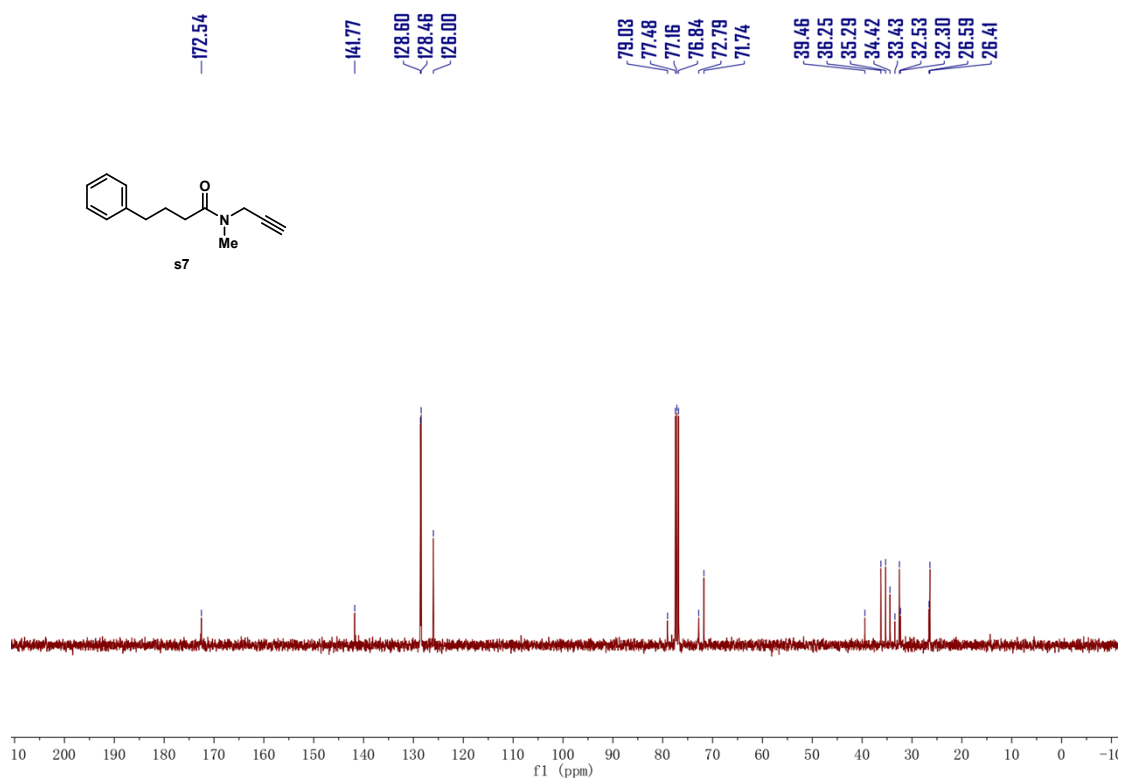

**<sup>1</sup>H NMR (400 MHz, CDCl<sub>3</sub>):**

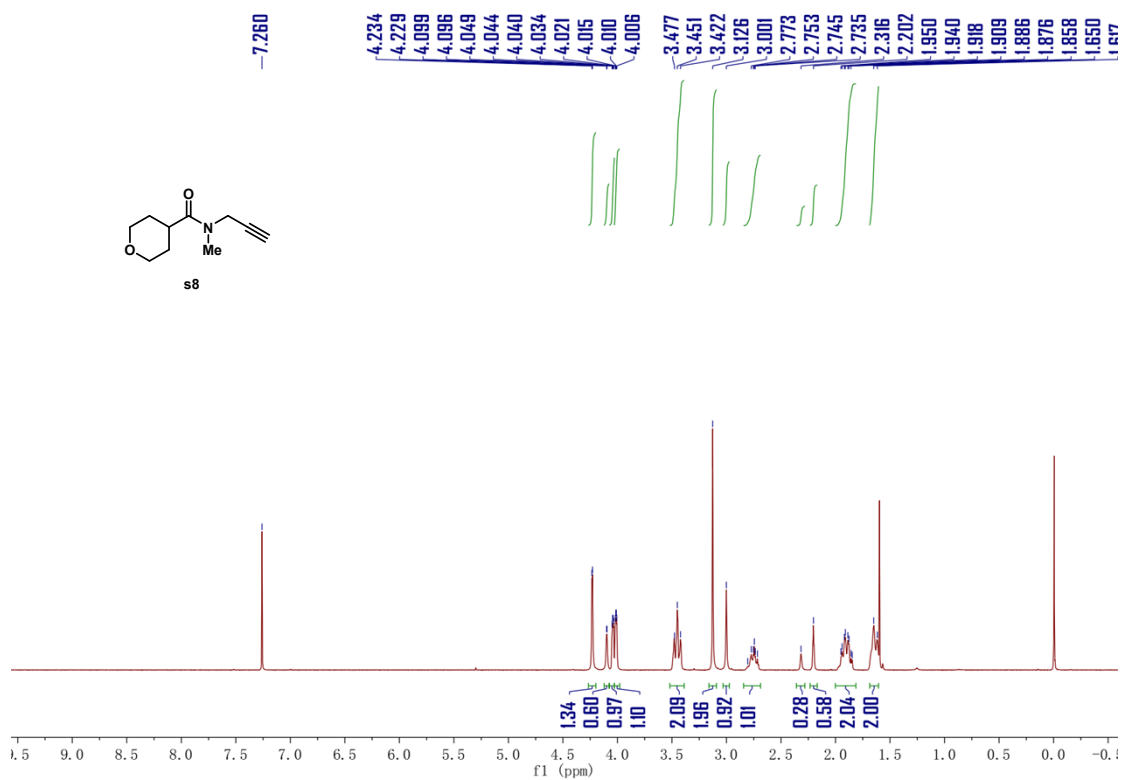

**<sup>13</sup>C NMR (101 MHz, CDCl<sub>3</sub>):**

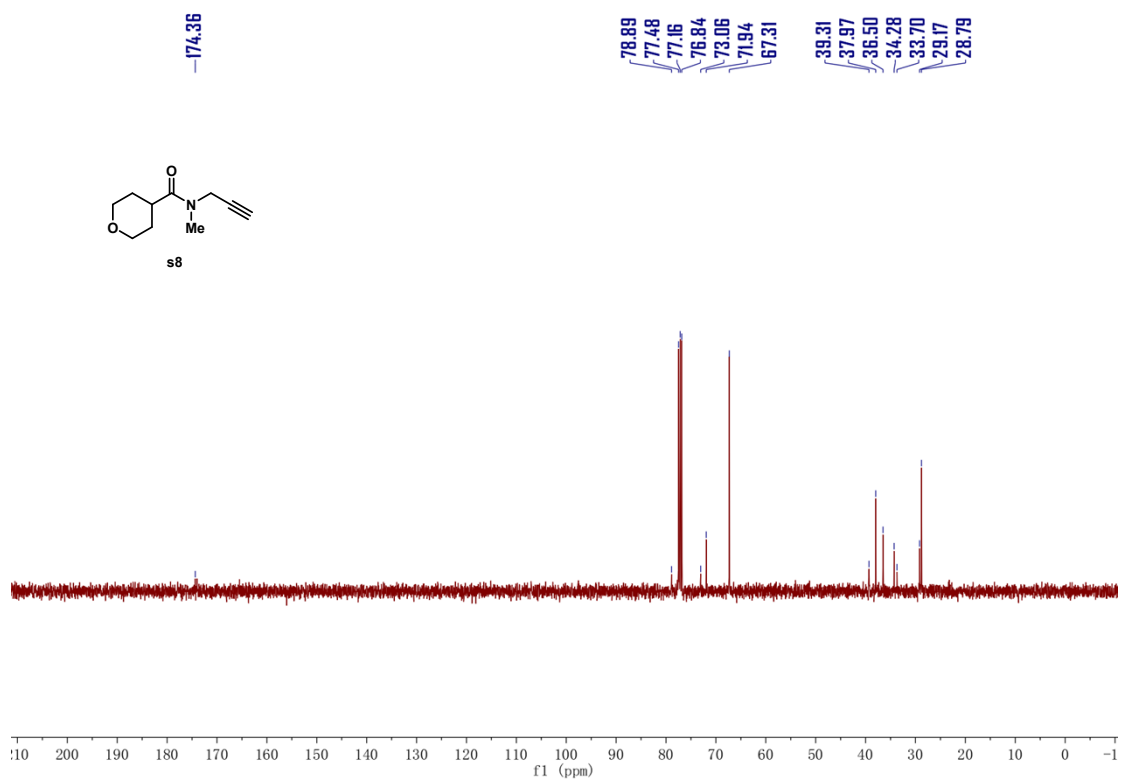

**<sup>1</sup>H NMR (400 MHz, CDCl<sub>3</sub>):**

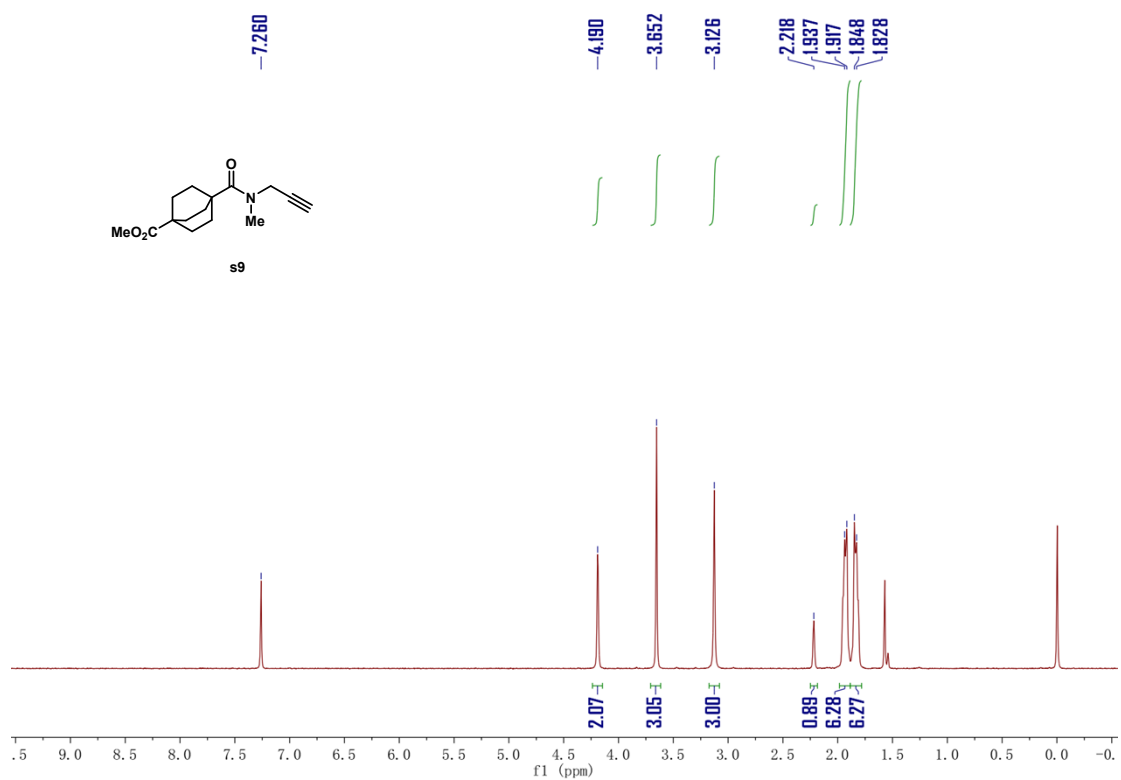

**<sup>13</sup>C NMR (101 MHz, CDCl<sub>3</sub>):**

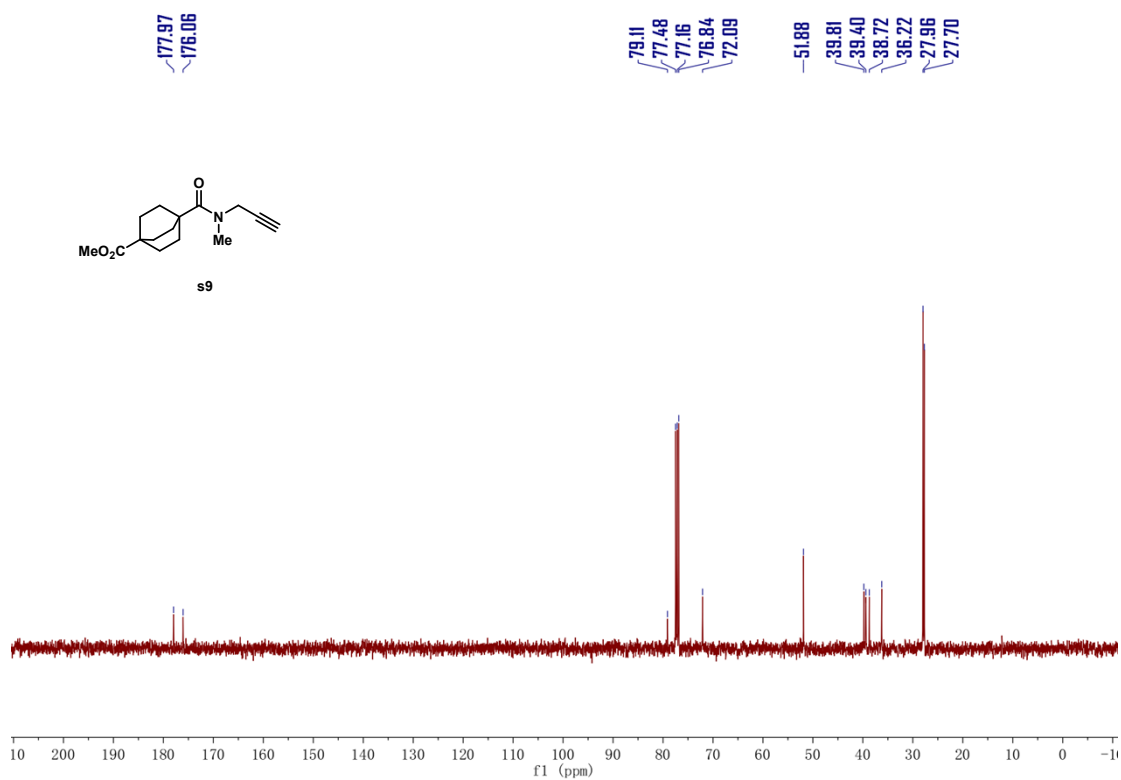

**<sup>1</sup>H NMR (400 MHz, CDCl<sub>3</sub>):**

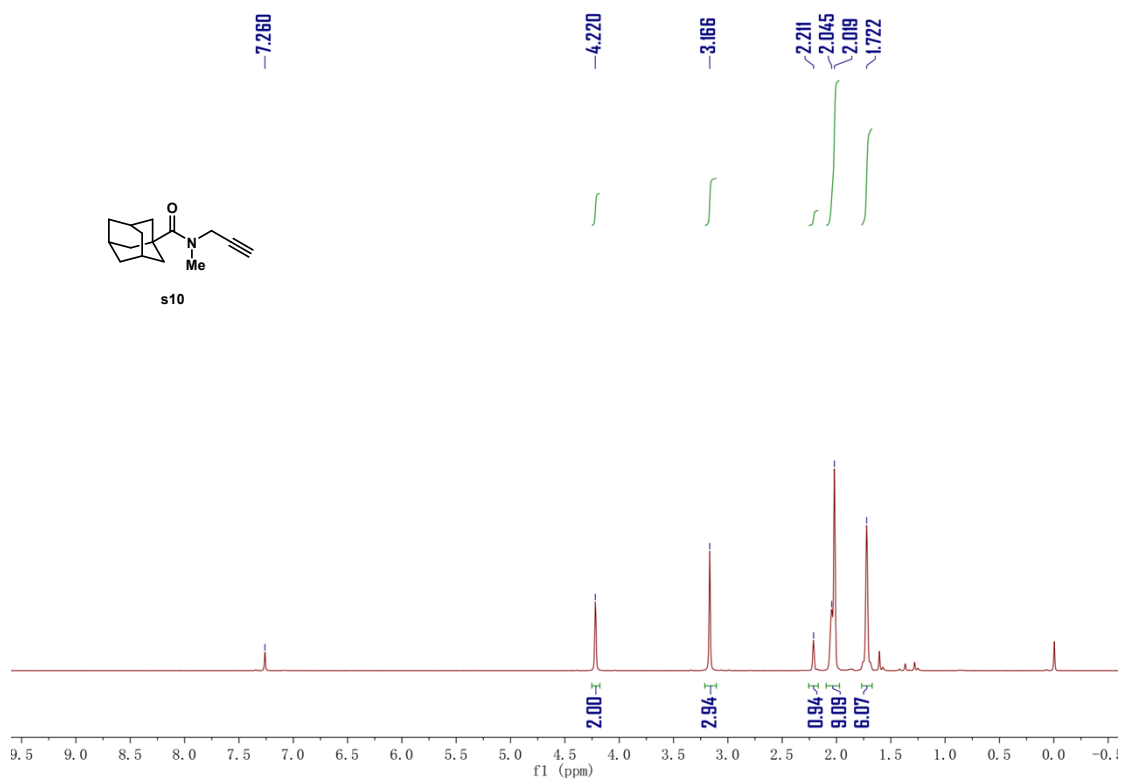

**<sup>13</sup>C NMR (101 MHz, CDCl<sub>3</sub>):**

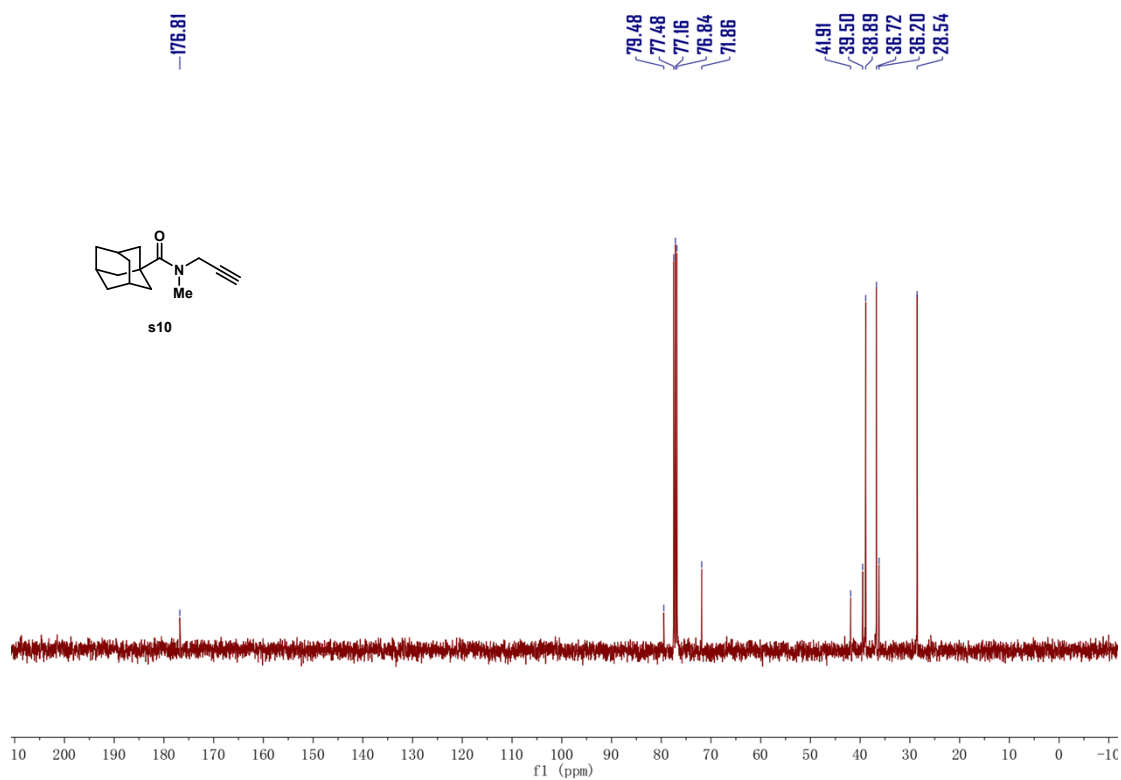

**<sup>1</sup>H NMR (400 MHz, CDCl<sub>3</sub>):**

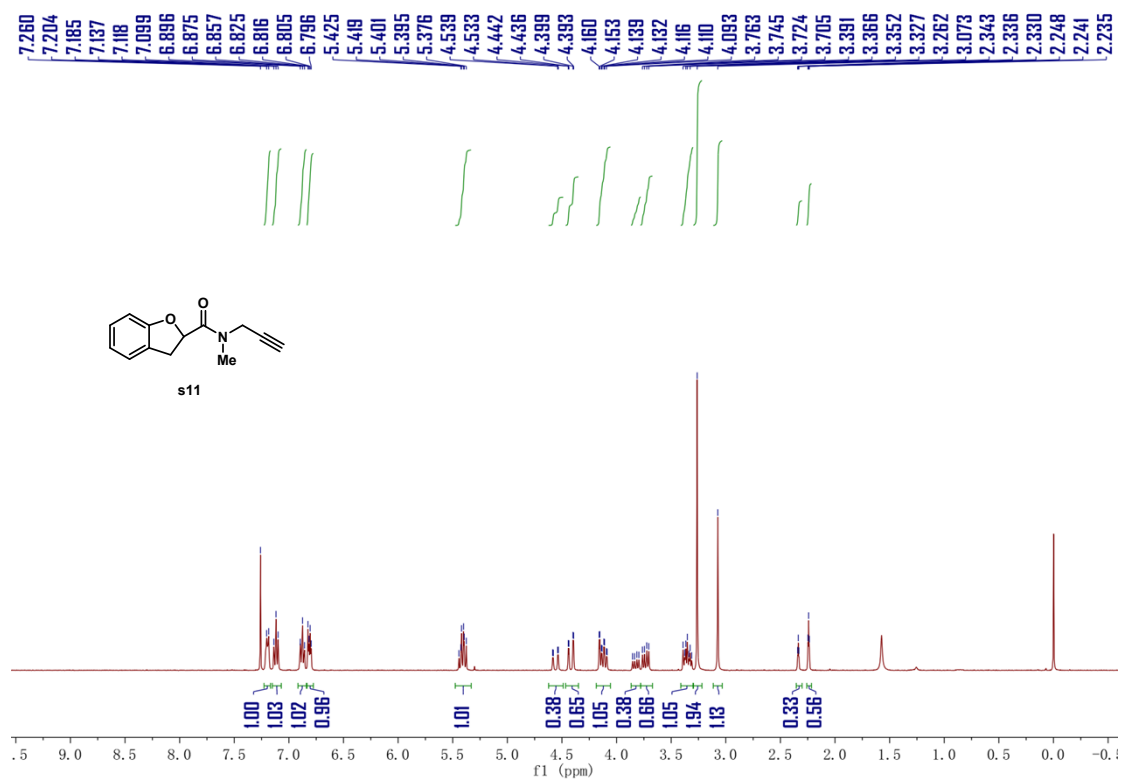



**<sup>13</sup>C NMR (101 MHz, CDCl<sub>3</sub>):**

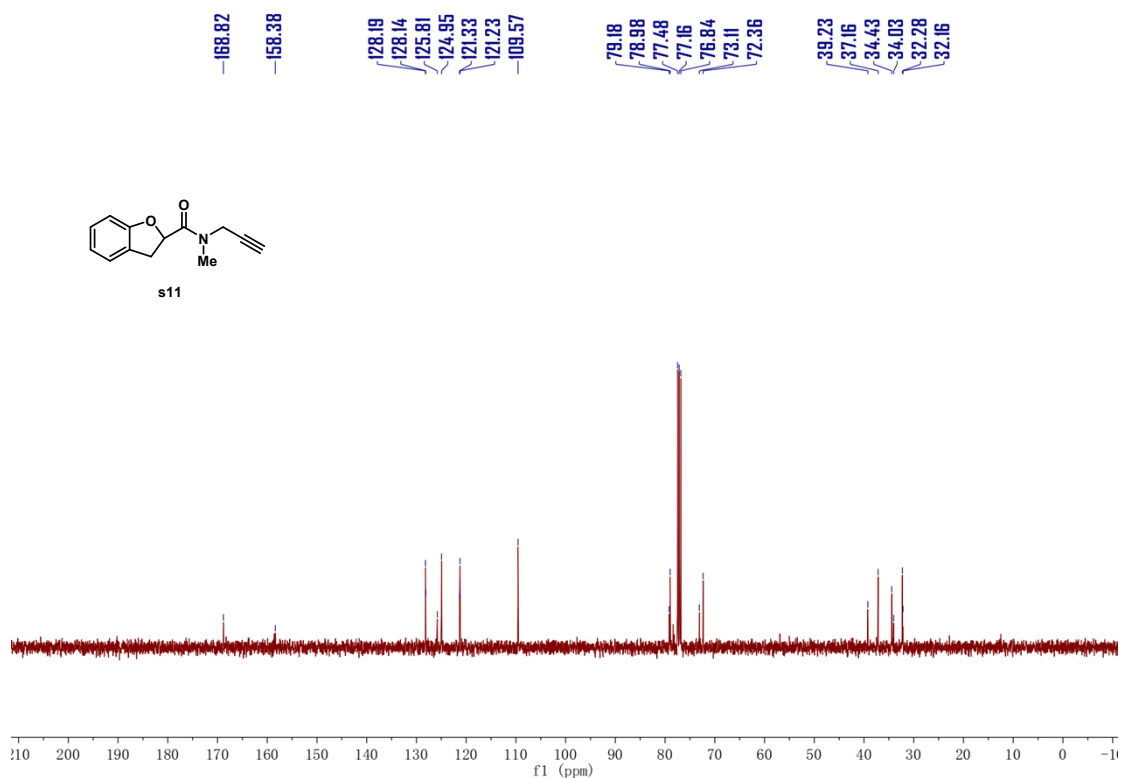

**<sup>1</sup>H NMR (300 MHz, CDCl<sub>3</sub>):**

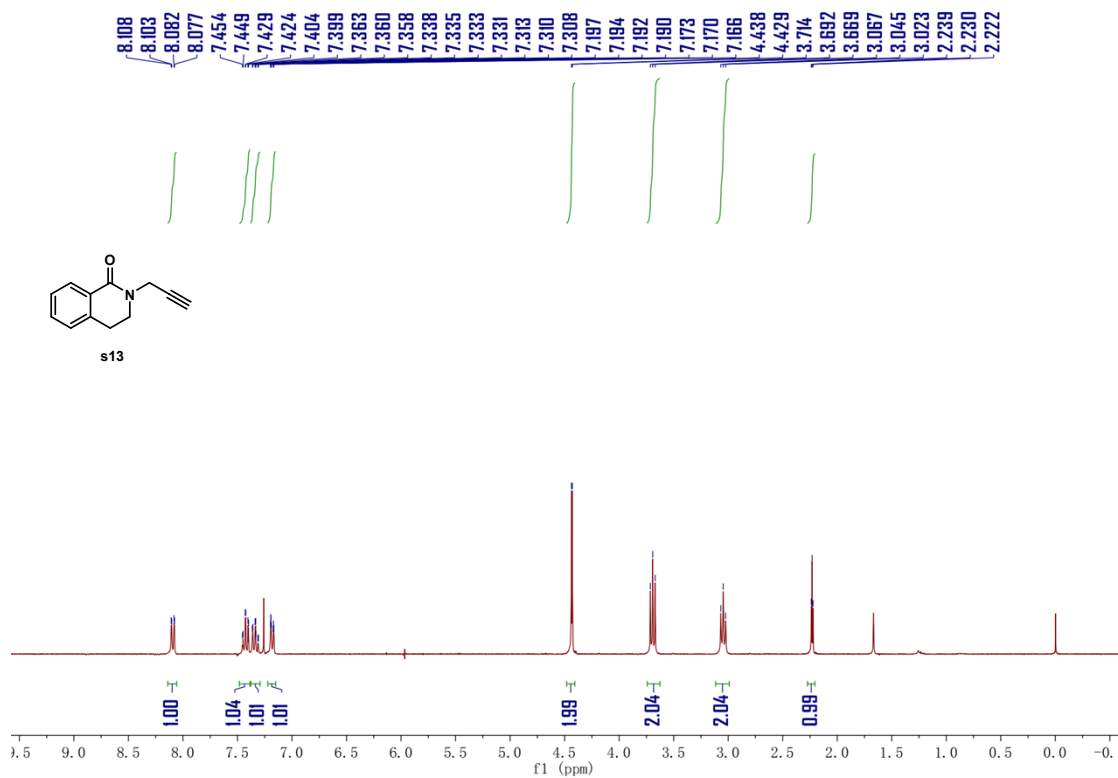

**<sup>1</sup>H NMR (300 MHz, CDCl<sub>3</sub>):**

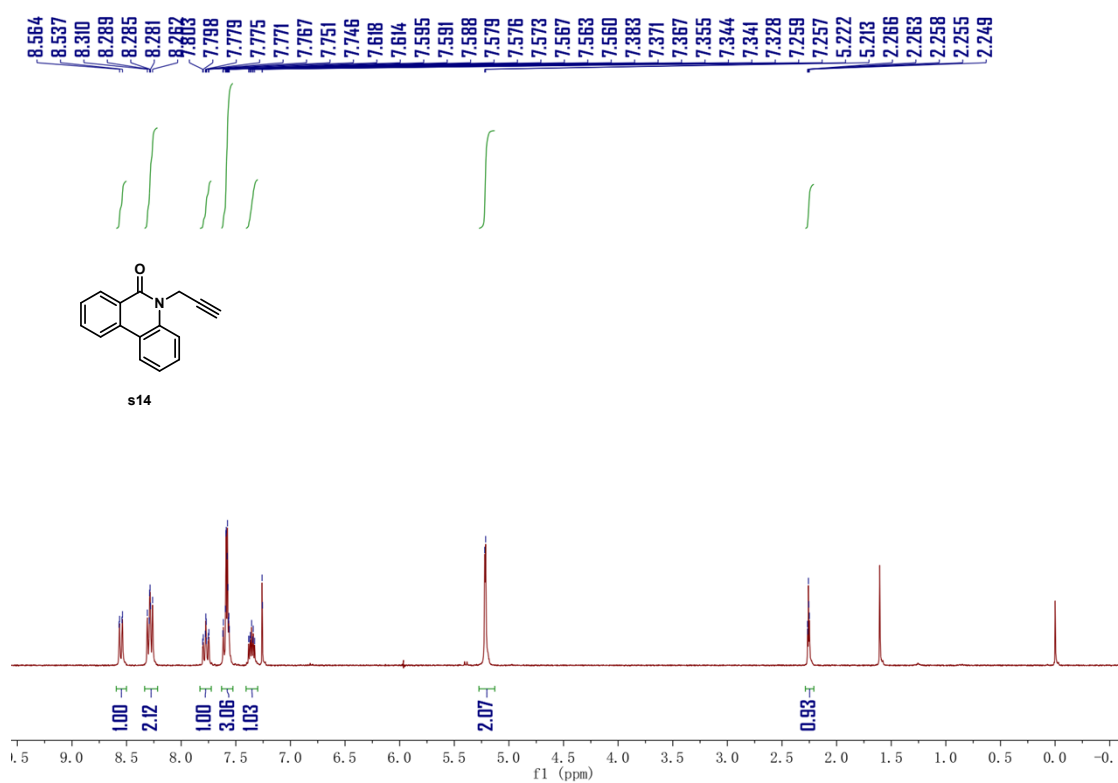

**<sup>1</sup>H NMR (400 MHz, CDCl<sub>3</sub>):**

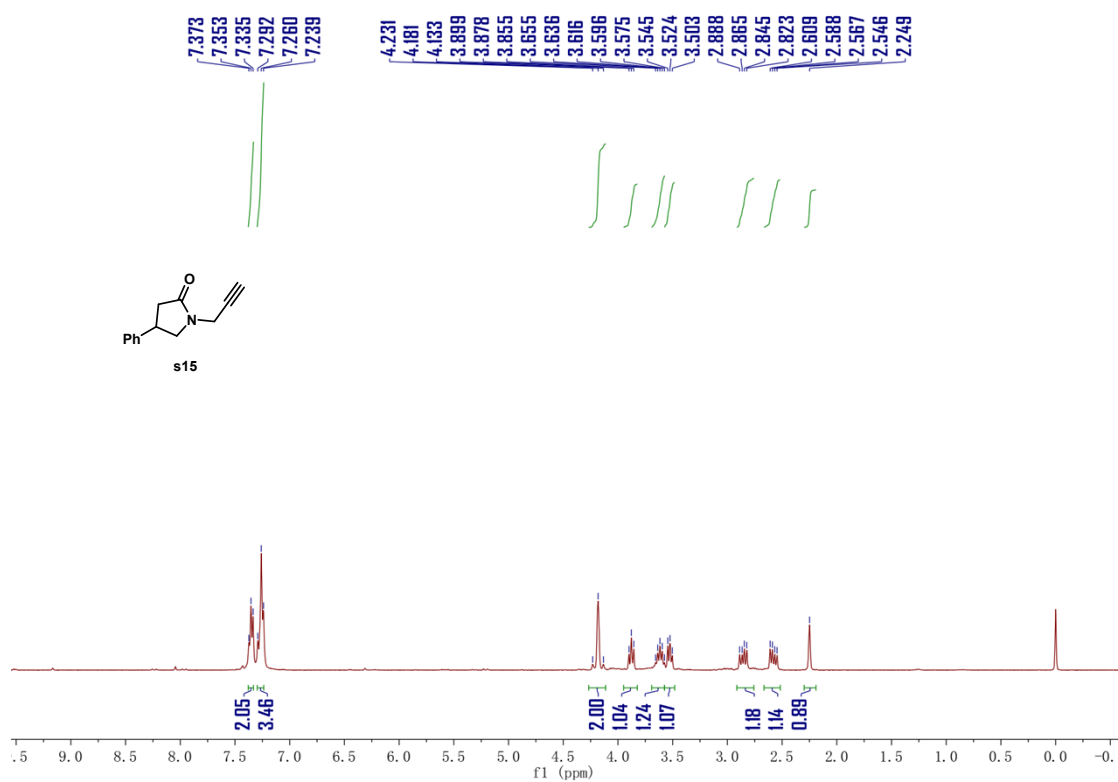

**<sup>1</sup>H NMR (400 MHz, CDCl<sub>3</sub>):**

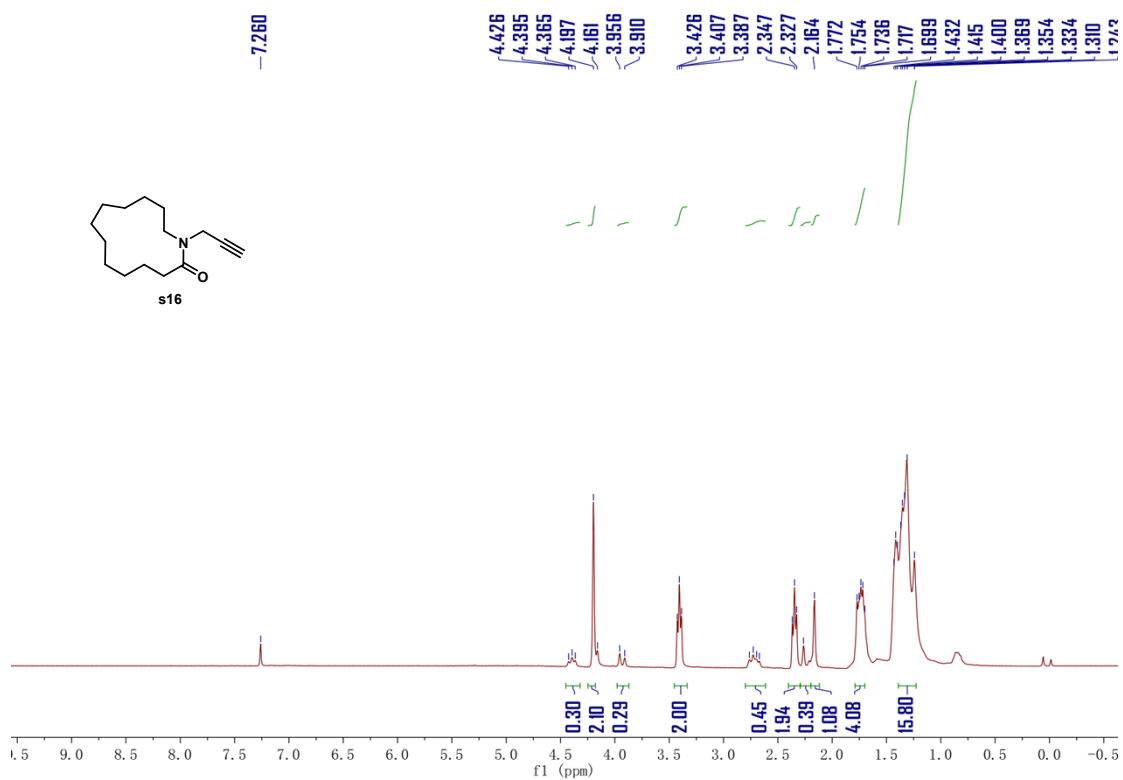

**<sup>13</sup>C NMR (101 MHz, CDCl<sub>3</sub>):**

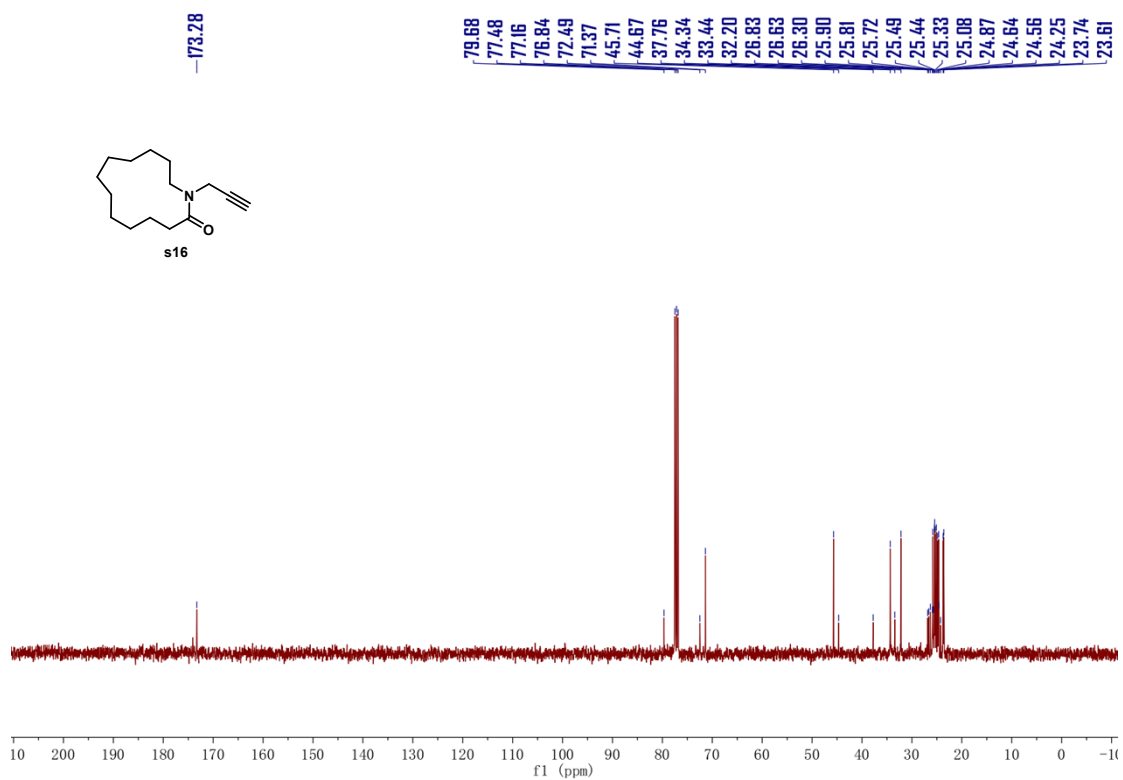

**<sup>1</sup>H NMR (400 MHz, CDCl<sub>3</sub>):**

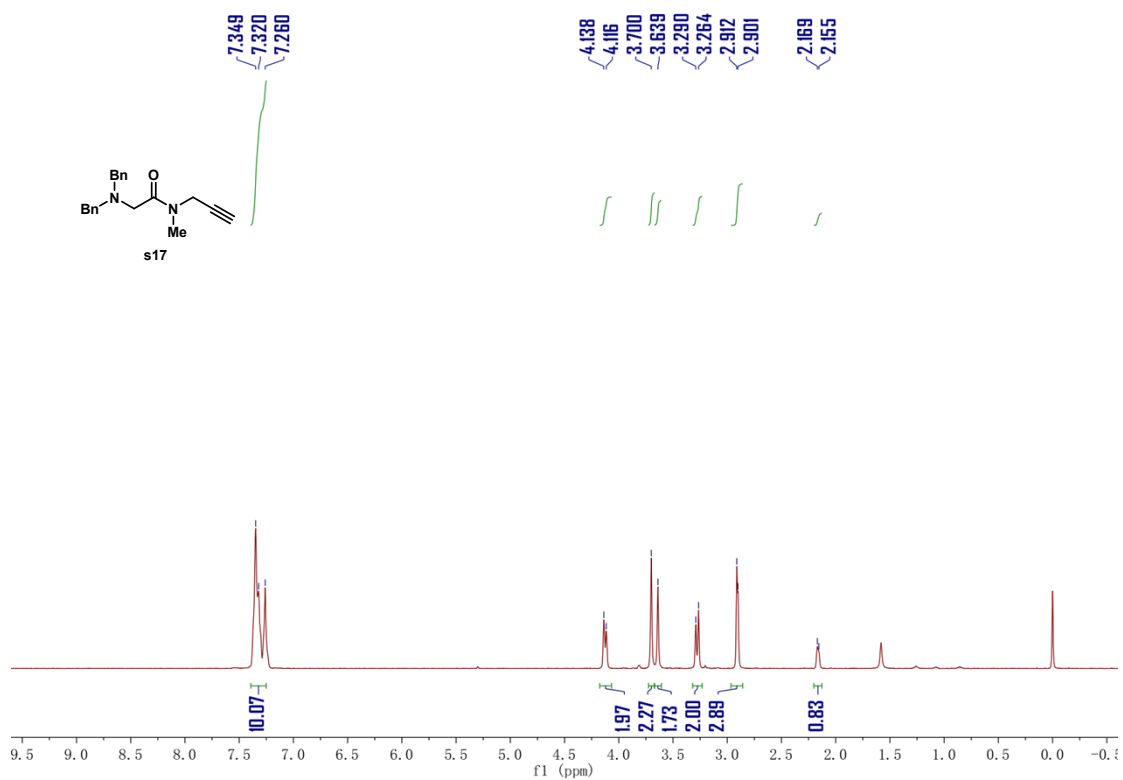

**<sup>13</sup>C NMR (101 MHz, CDCl<sub>3</sub>):**

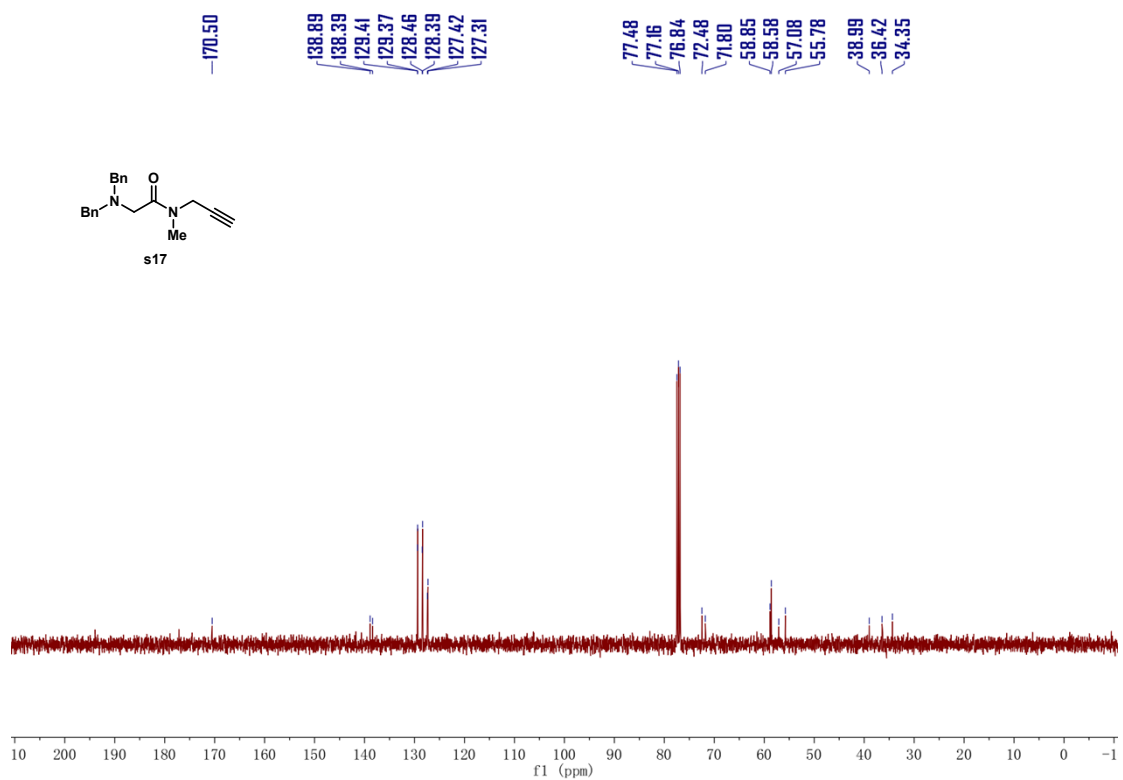

### <sup>1</sup>H NMR (400 MHz, CDCl<sub>3</sub>):

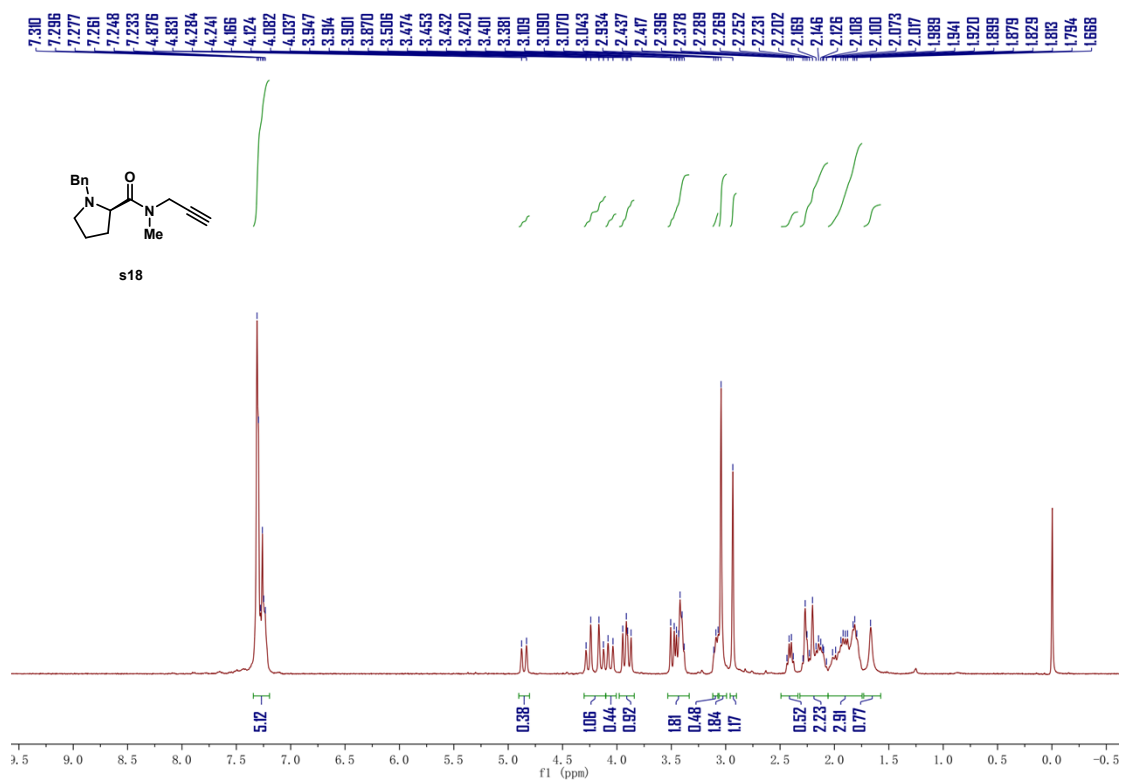

### <sup>13</sup>C NMR (101 MHz, CDCl<sub>3</sub>):

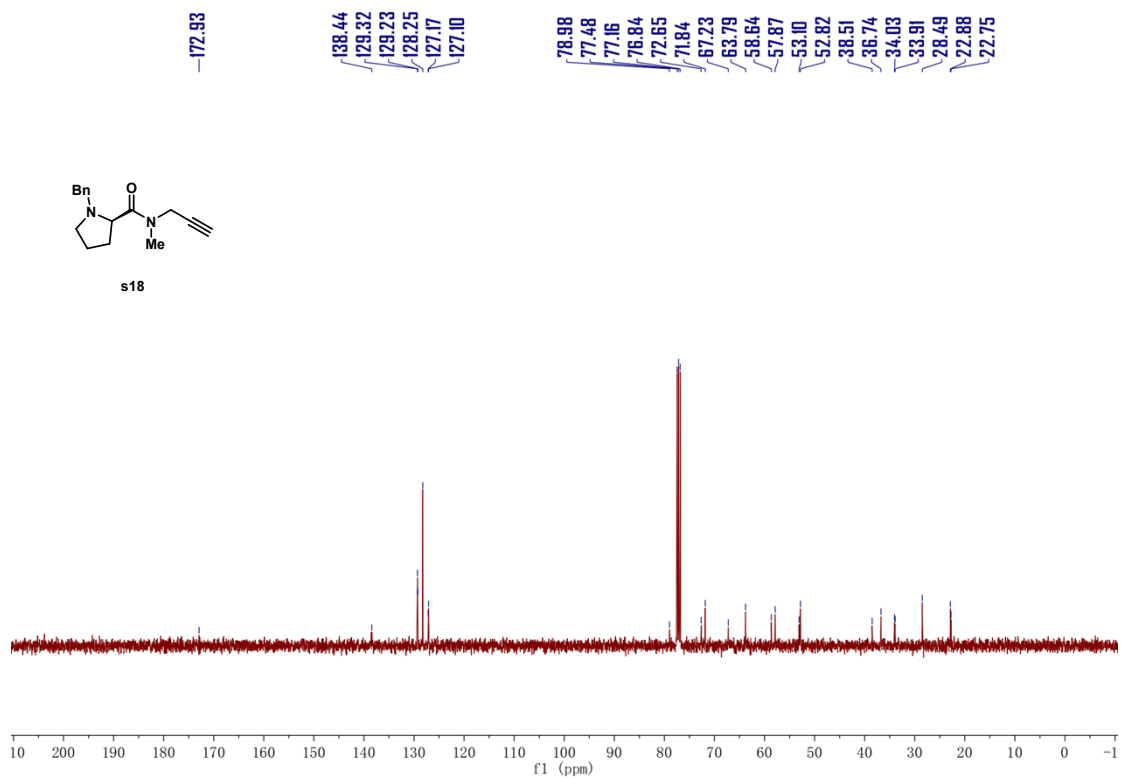

**<sup>1</sup>H NMR (400 MHz, CDCl<sub>3</sub>):**

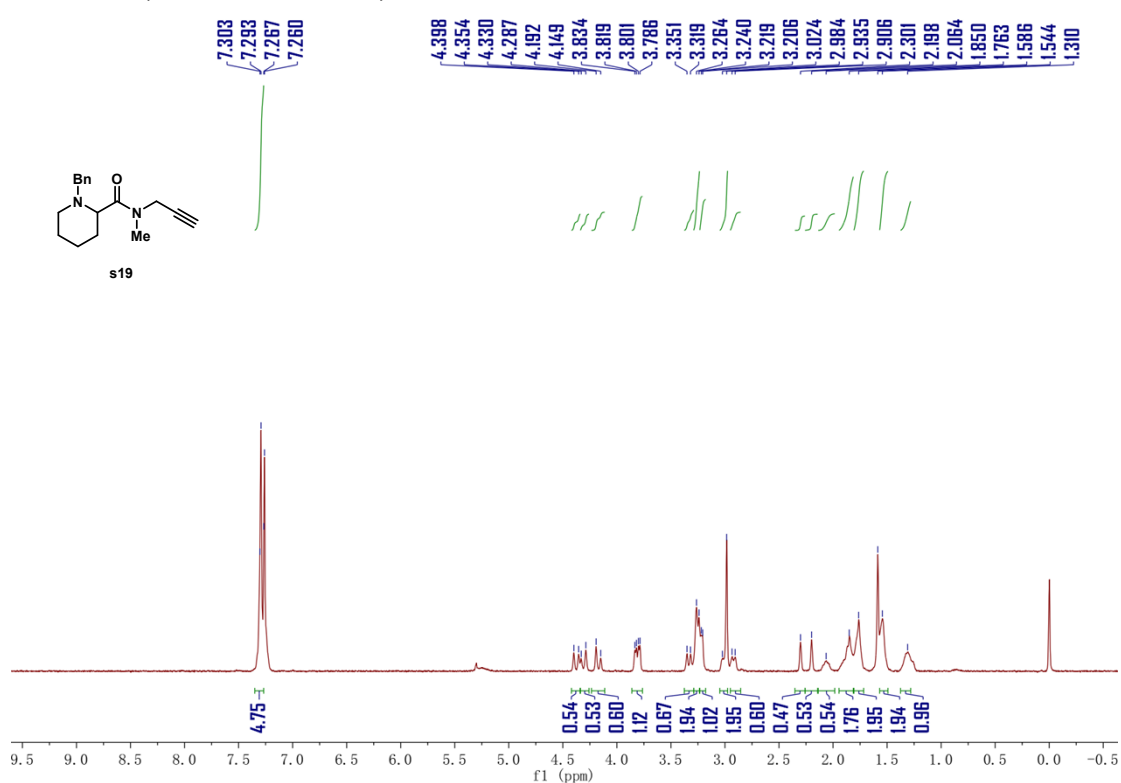

**<sup>13</sup>C NMR (101 MHz, CDCl<sub>3</sub>):**

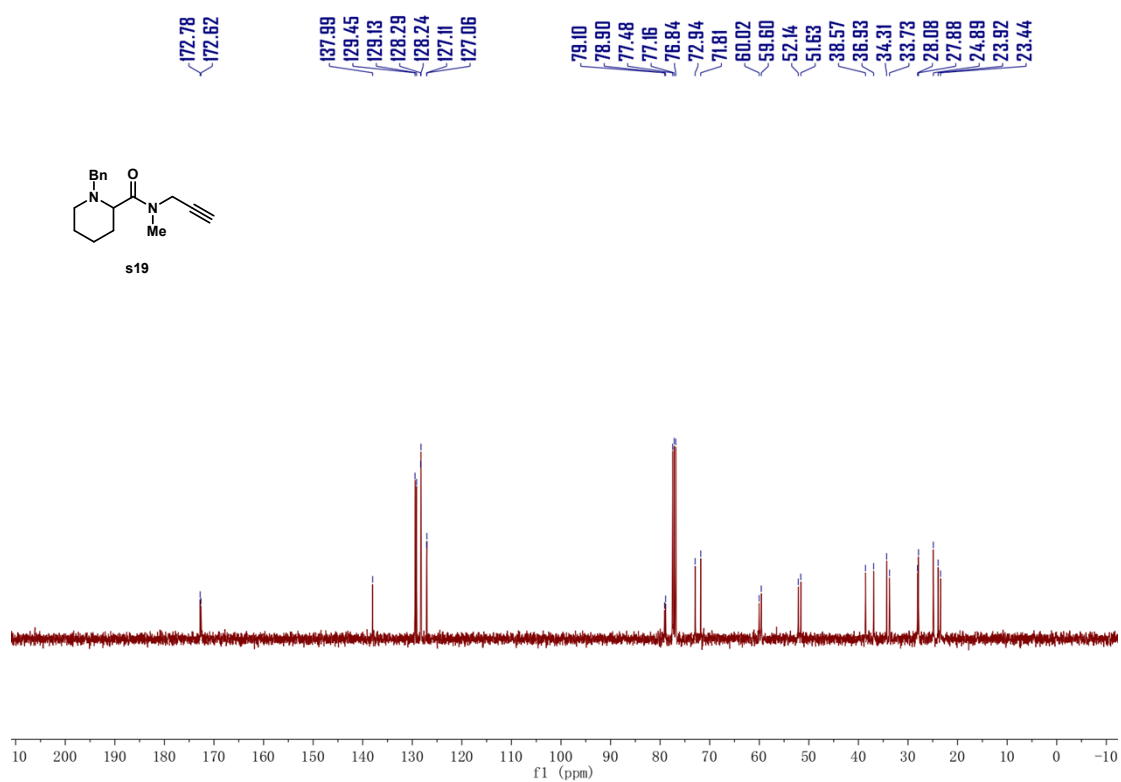

### <sup>1</sup>H NMR (400 MHz, CDCl<sub>3</sub>):

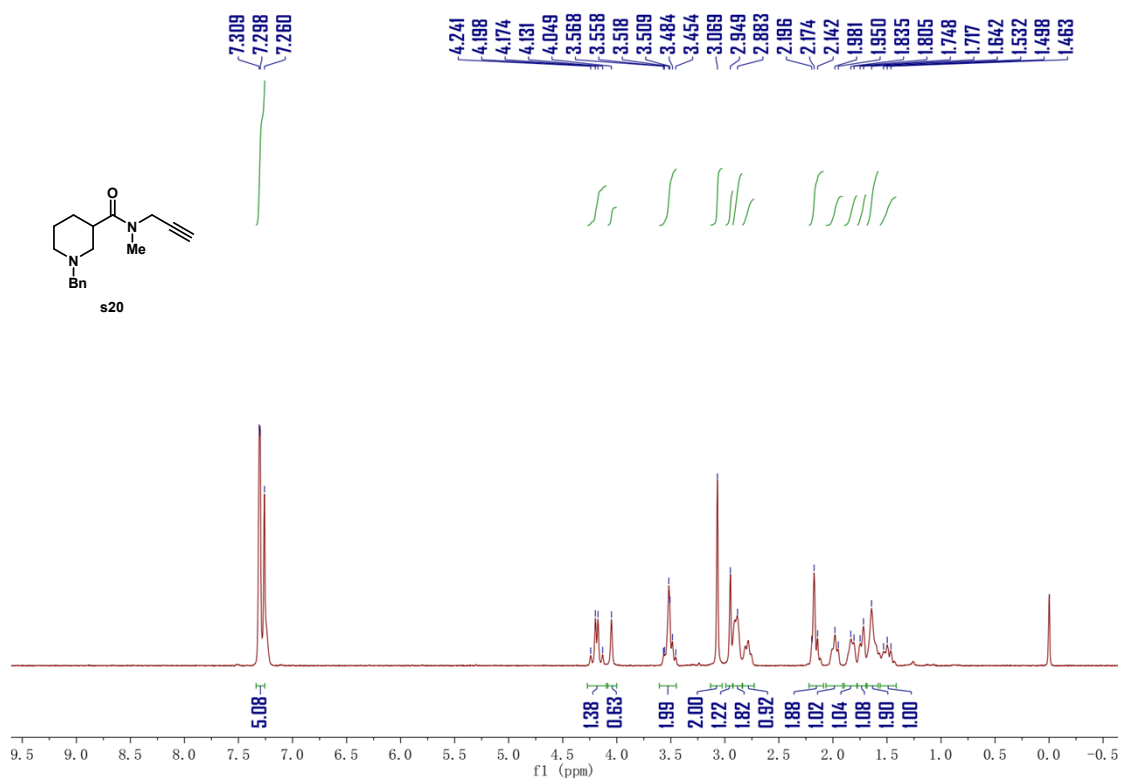

### <sup>13</sup>C NMR (101 MHz, CDCl<sub>3</sub>):

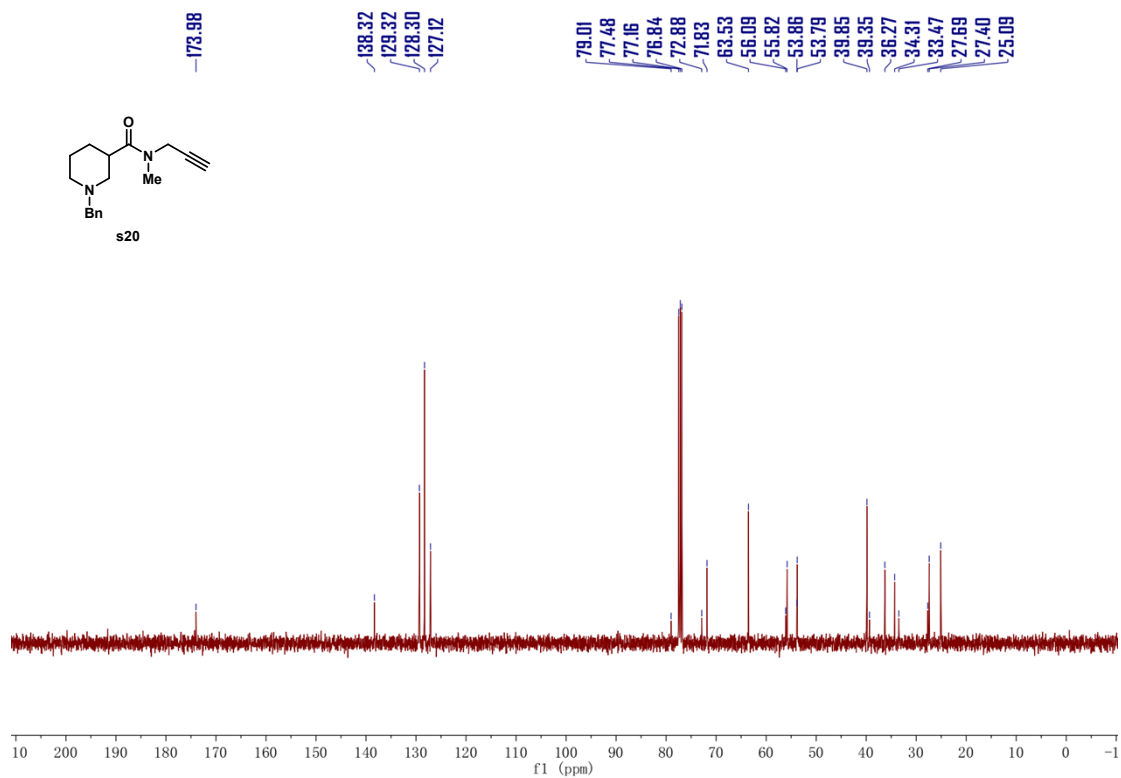

**<sup>1</sup>H NMR (400 MHz, CDCl<sub>3</sub>):**

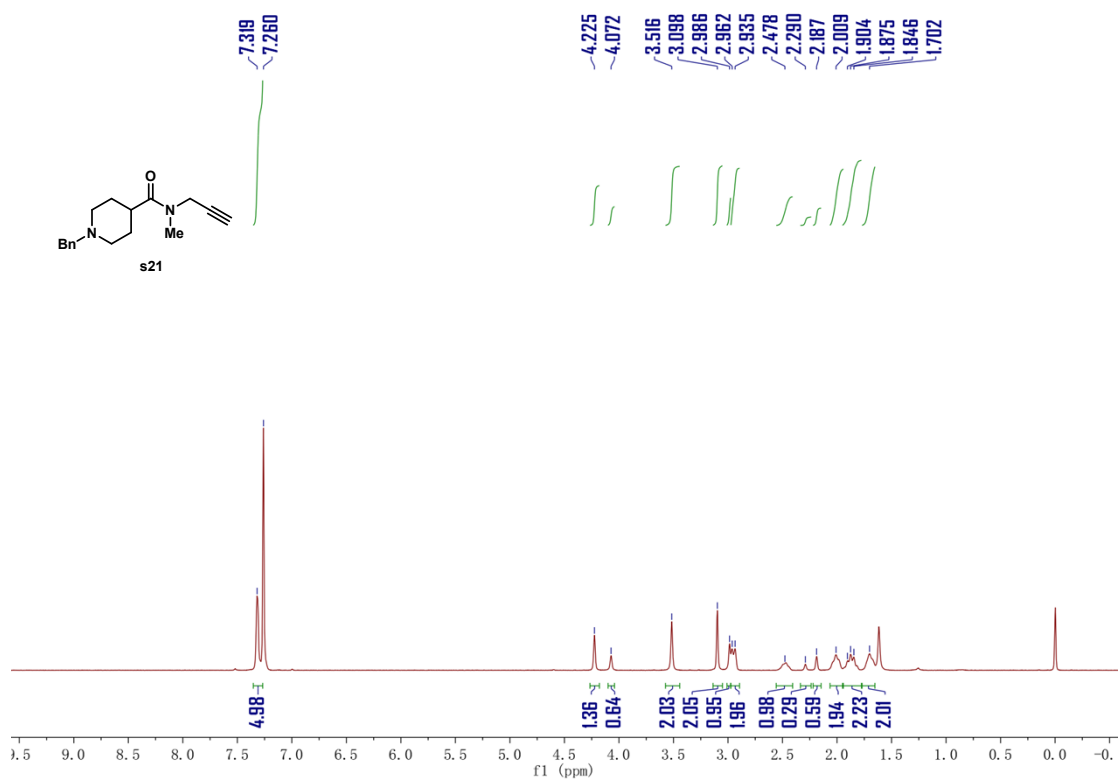

**<sup>13</sup>C NMR (101 MHz, CDCl<sub>3</sub>):**

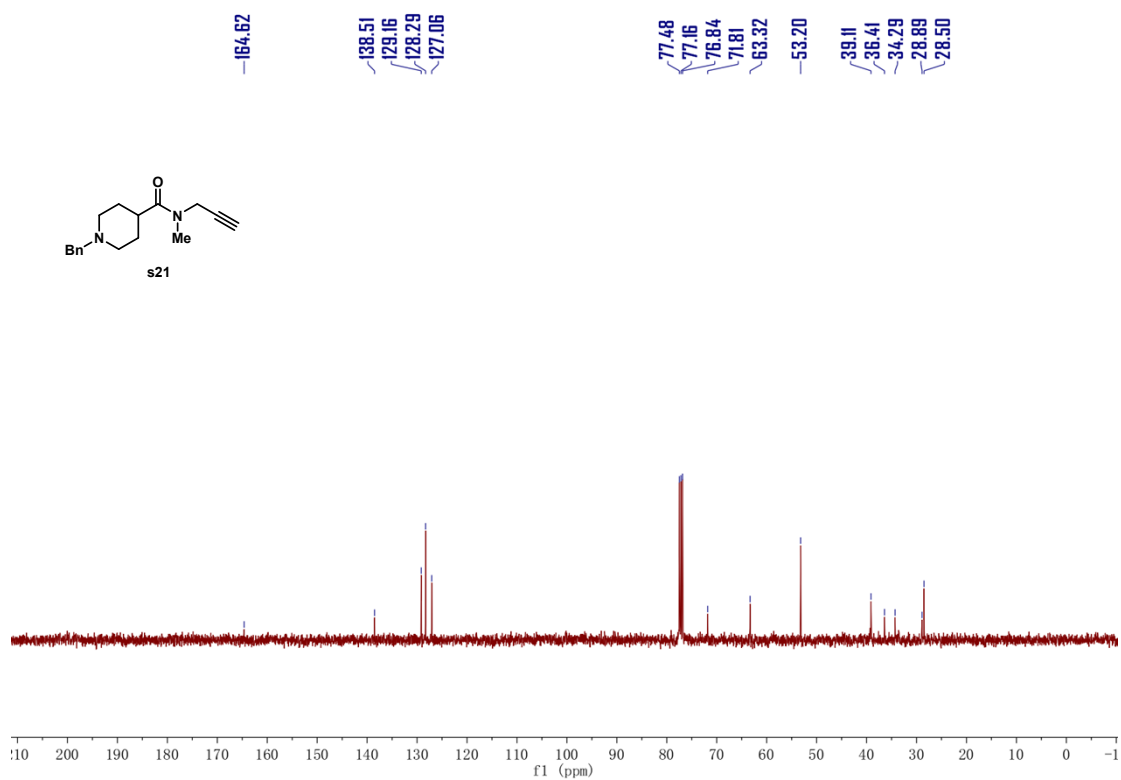



**<sup>1</sup>H NMR (400 MHz, CDCl<sub>3</sub>):**

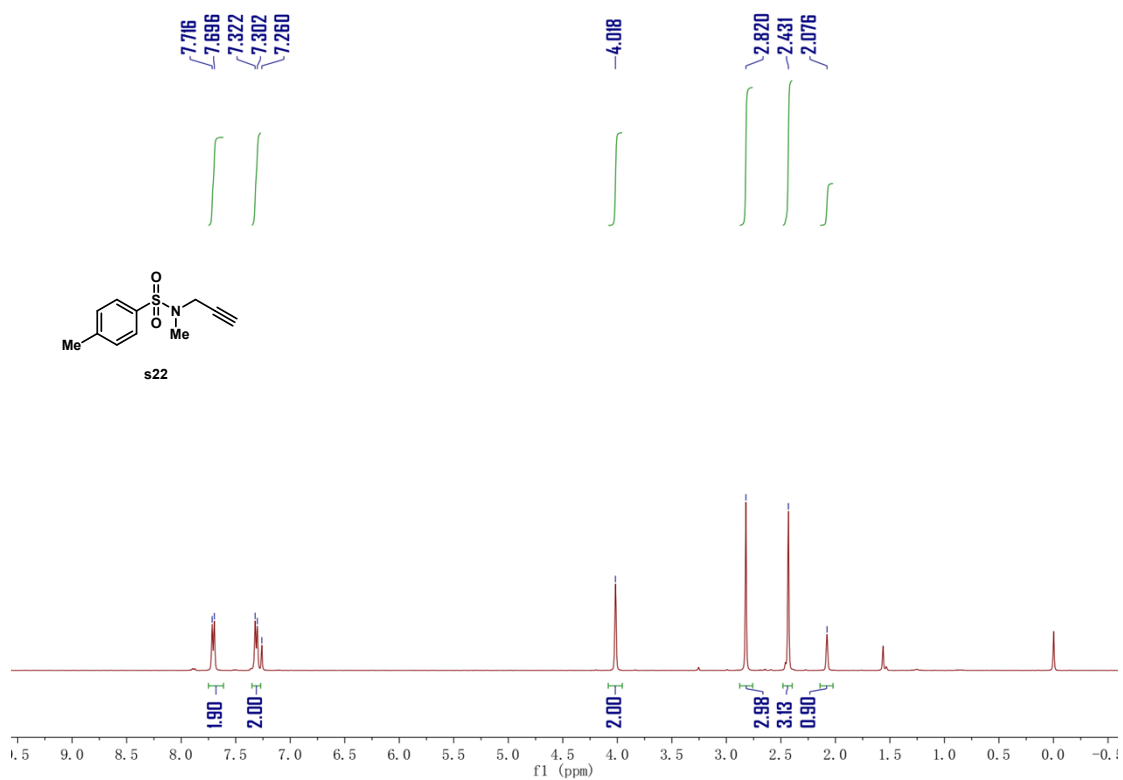

**<sup>1</sup>H NMR (400 MHz, CDCl<sub>3</sub>):**

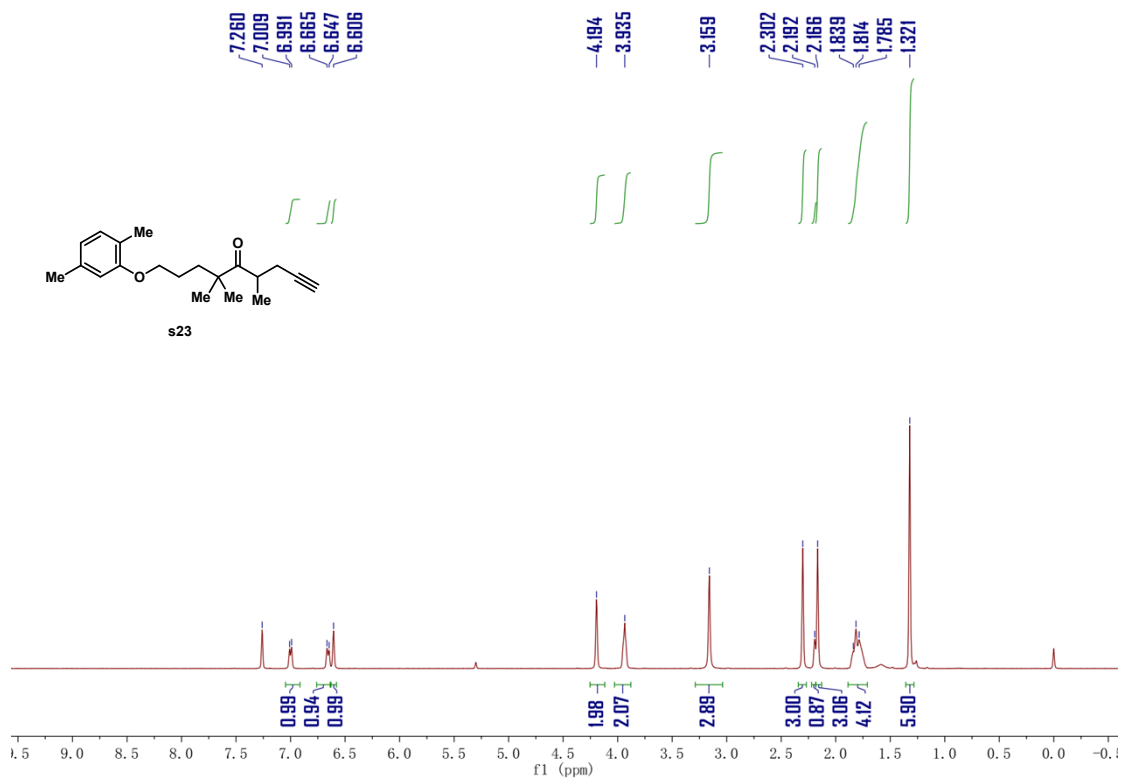

**<sup>13</sup>C NMR (101 MHz, CDCl<sub>3</sub>):**

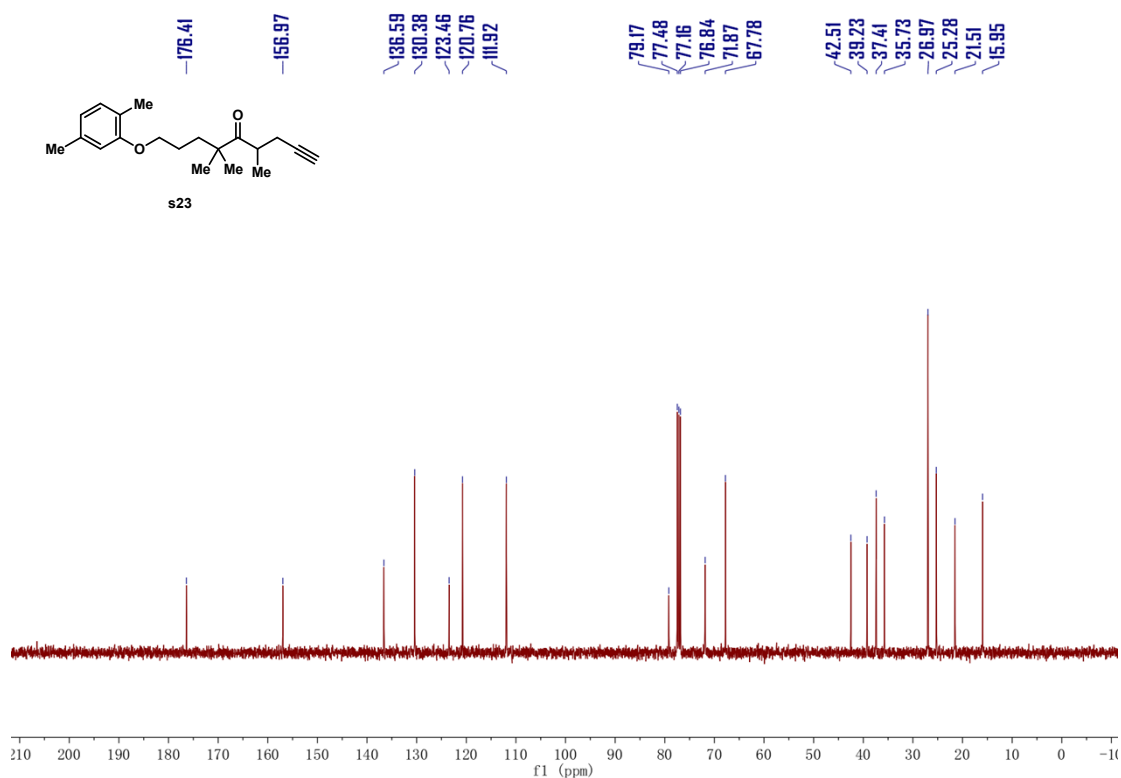

**<sup>1</sup>H NMR (400 MHz, CDCl<sub>3</sub>):**

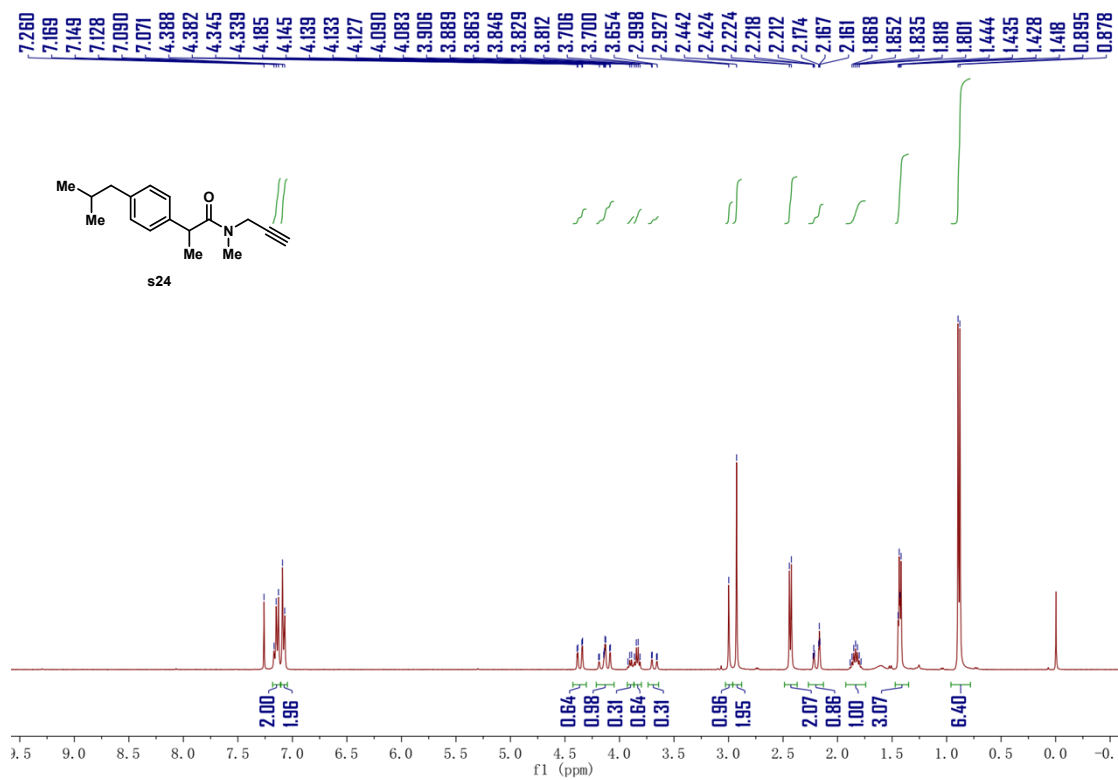

### <sup>13</sup>C NMR (101 MHz, CDCl<sub>3</sub>):

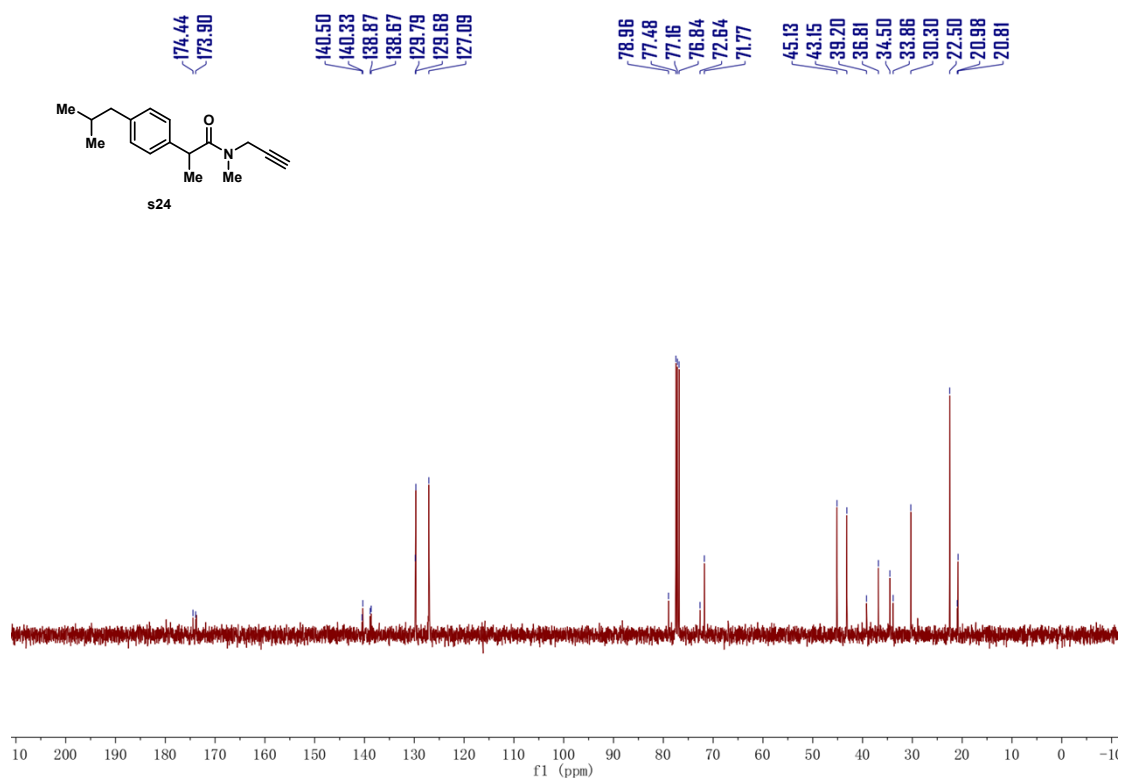

### <sup>1</sup>H NMR (400 MHz, CDCl<sub>3</sub>):

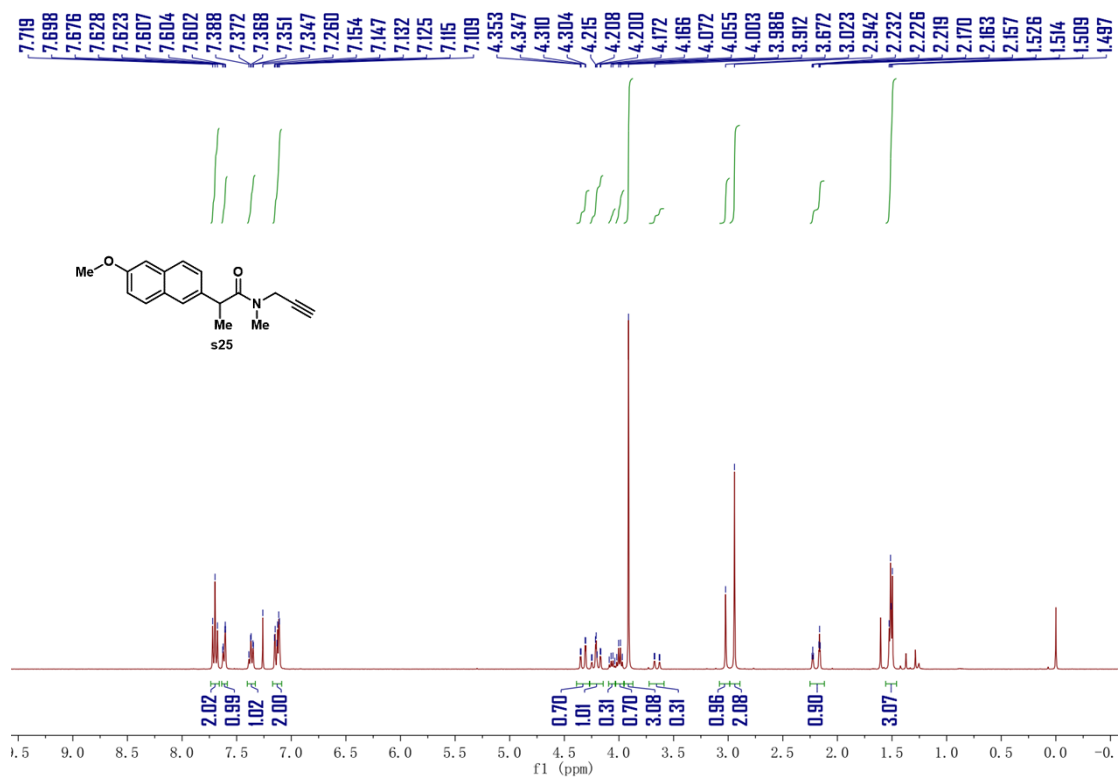

### $^{13}\text{C}$ NMR (101 MHz, $\text{CDCl}_3$ ):

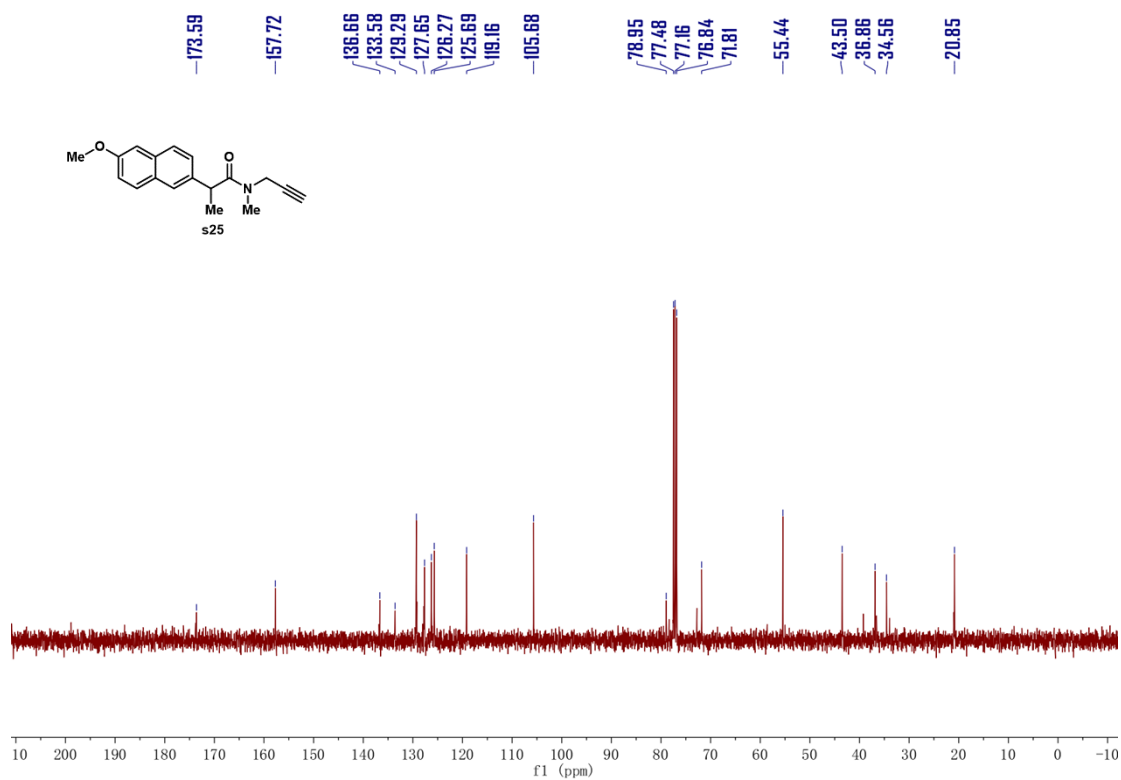

### $^1\text{H}$ NMR (400 MHz, $\text{CDCl}_3$ ):

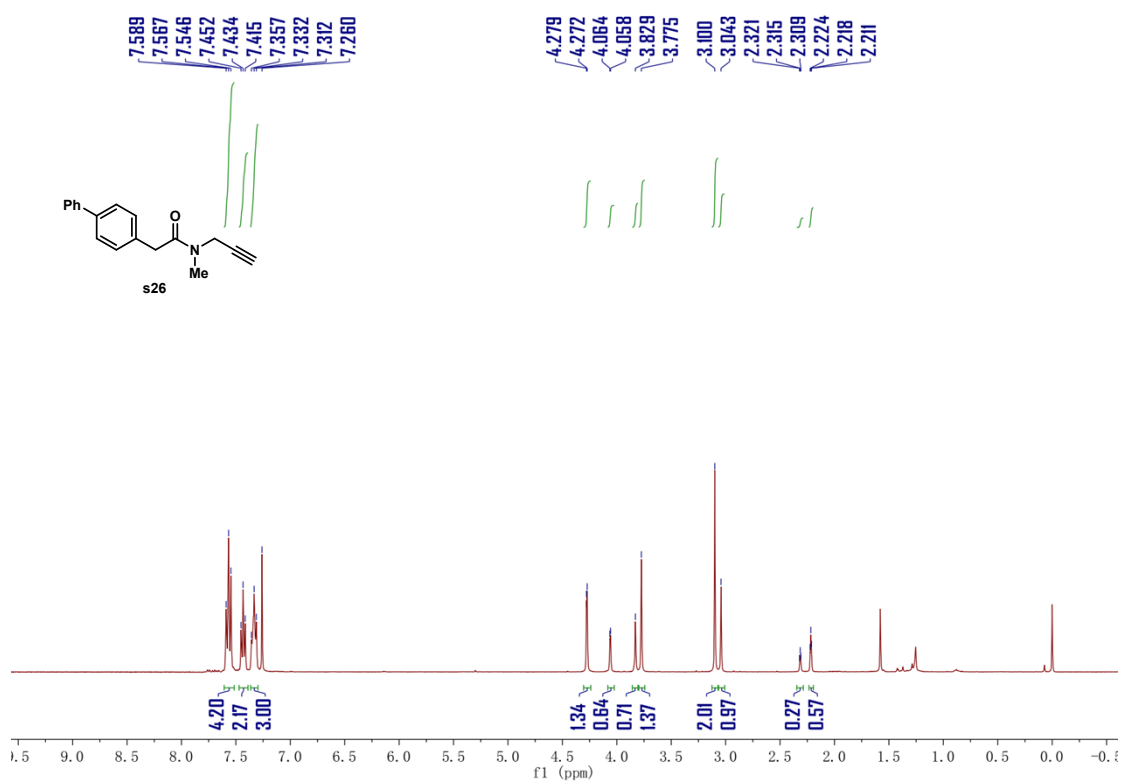

**<sup>13</sup>C NMR (101 MHz, CDCl<sub>3</sub>):**

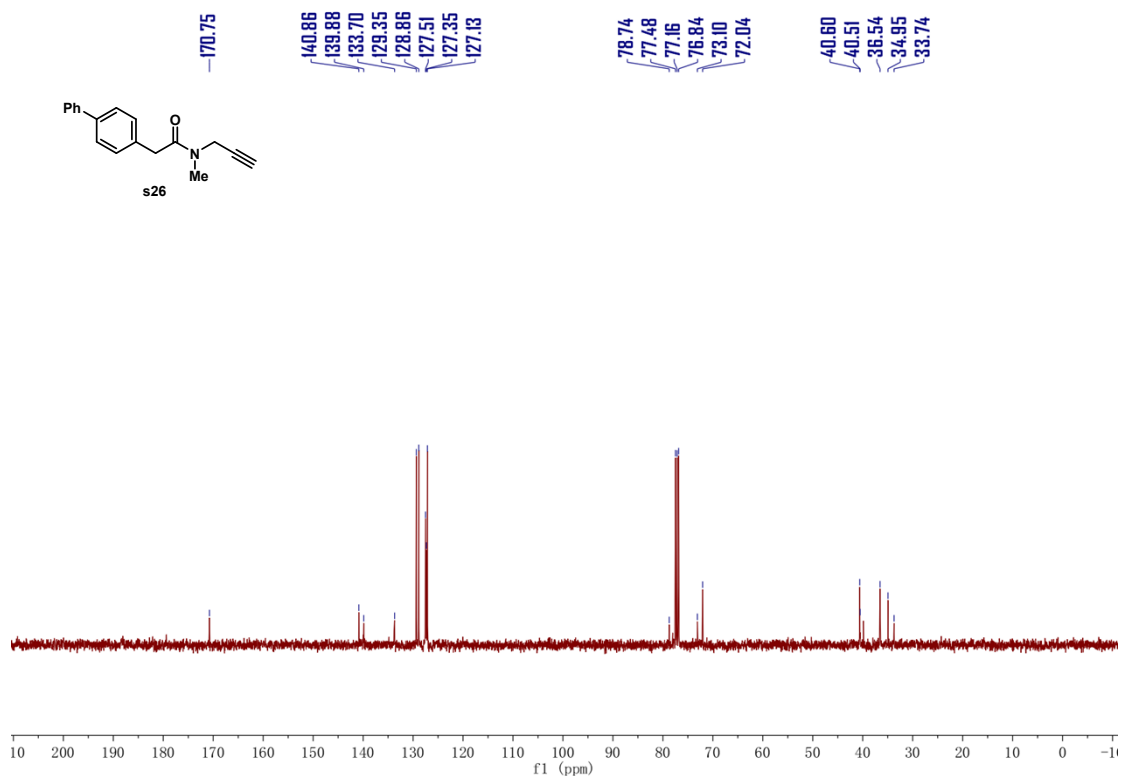

**<sup>1</sup>H NMR (400 MHz, CDCl<sub>3</sub>):**

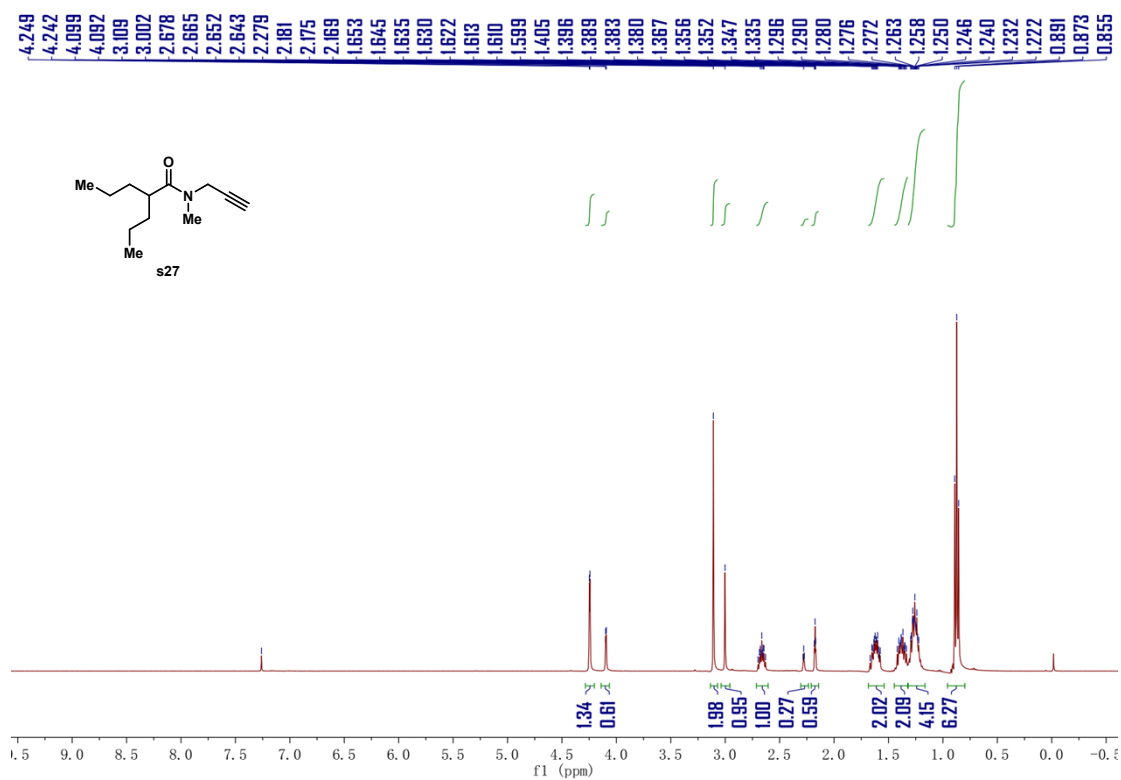

**$^{13}\text{C}$  NMR (101 MHz,  $\text{CDCl}_3$ ):**

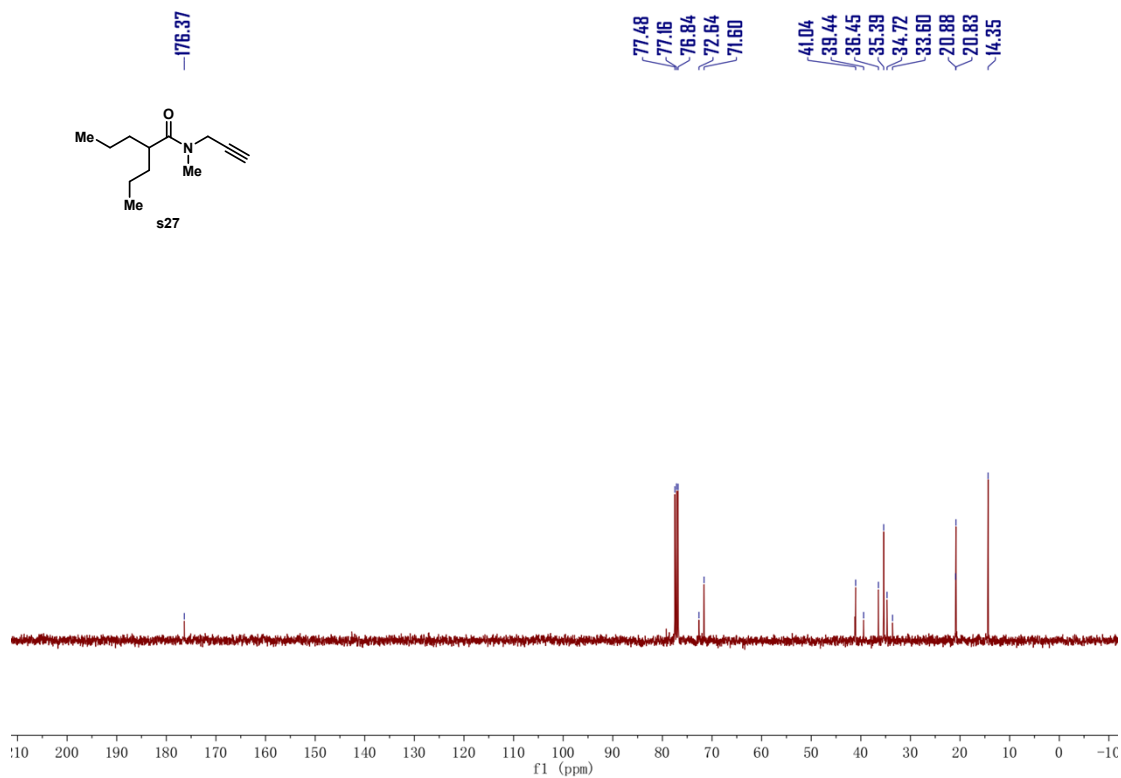

**$^1\text{H}$  NMR (400 MHz,  $\text{CDCl}_3$ ):**

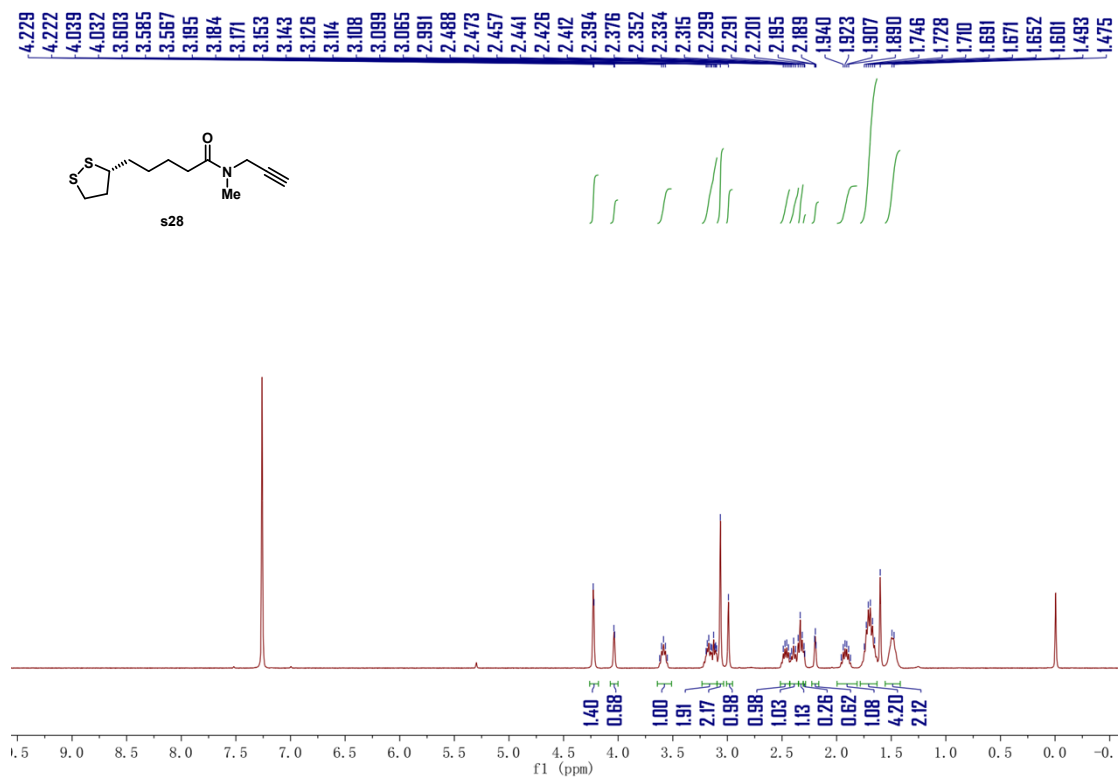

**$^{13}\text{C}$  NMR (101 MHz,  $\text{CDCl}_3$ ):**

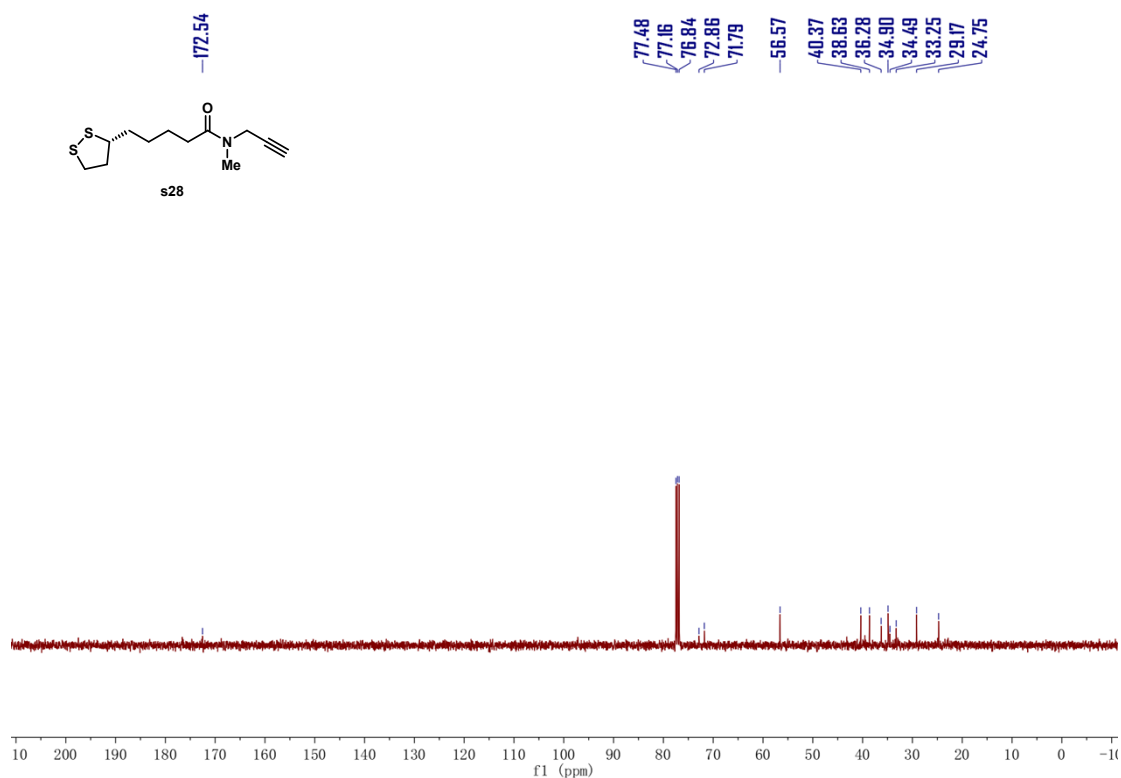

**$^1\text{H}$  NMR (400 MHz,  $\text{CDCl}_3$ ):**

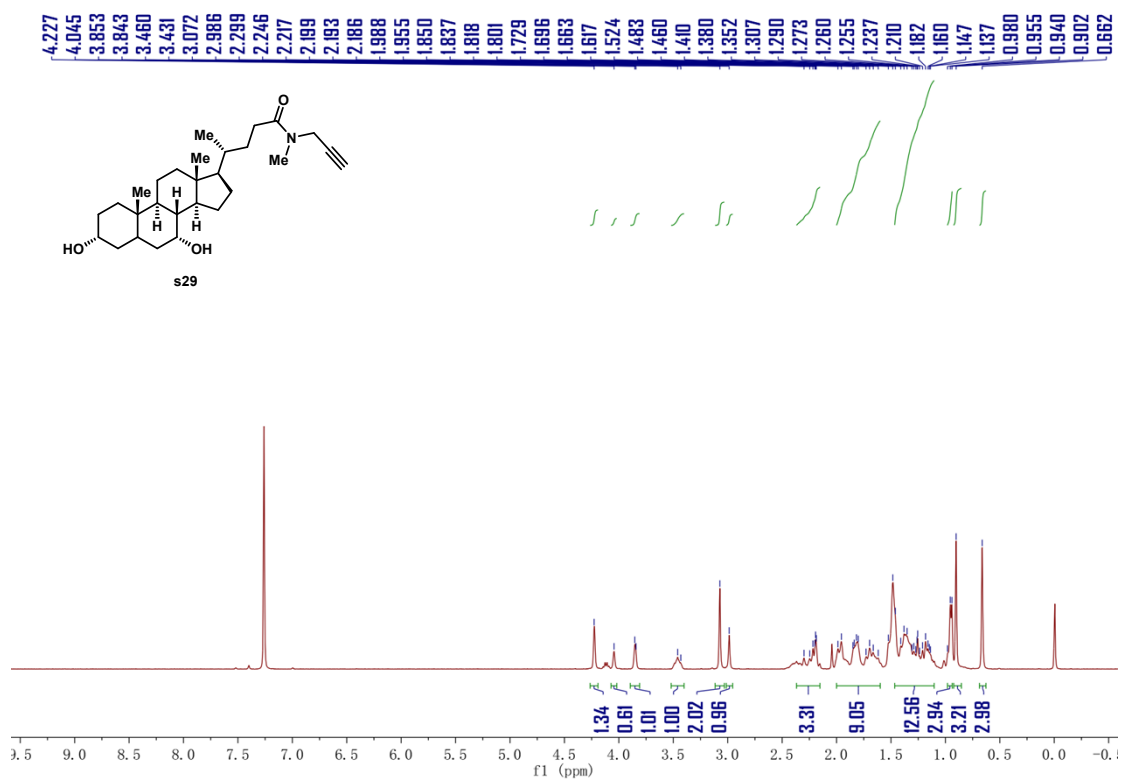

### <sup>13</sup>C NMR (101 MHz, CDCl<sub>3</sub>):

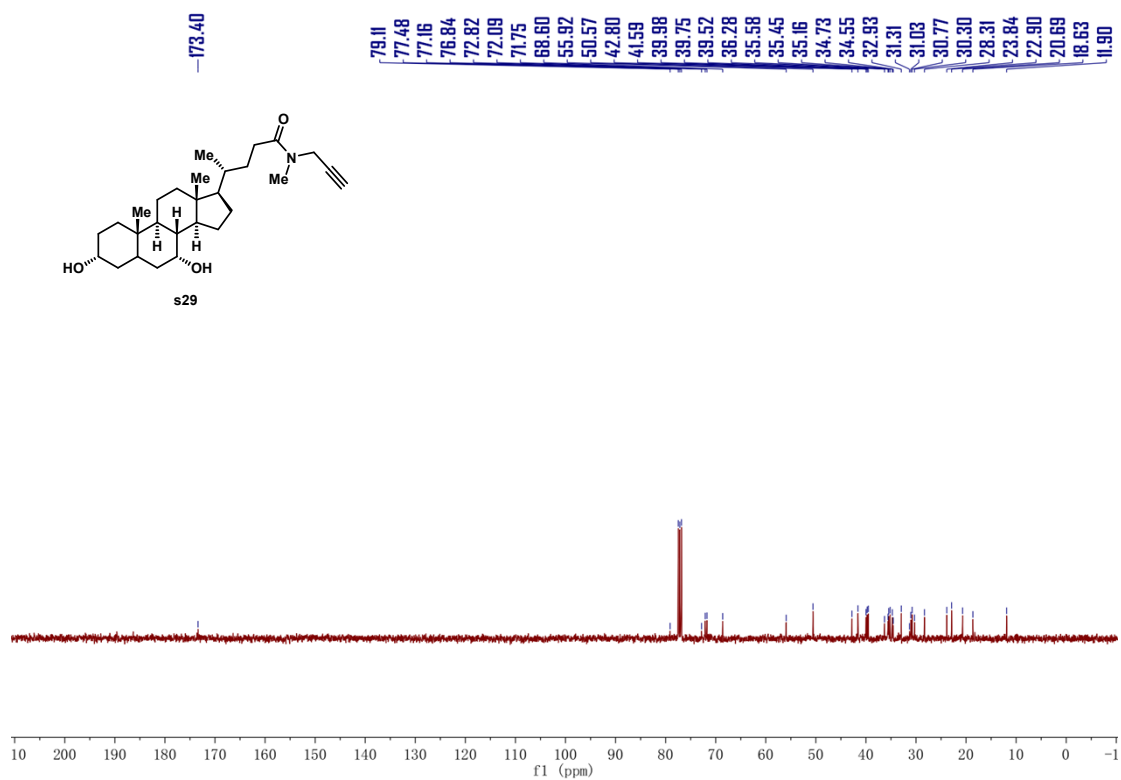

### <sup>1</sup>H NMR (400 MHz, CDCl<sub>3</sub>):

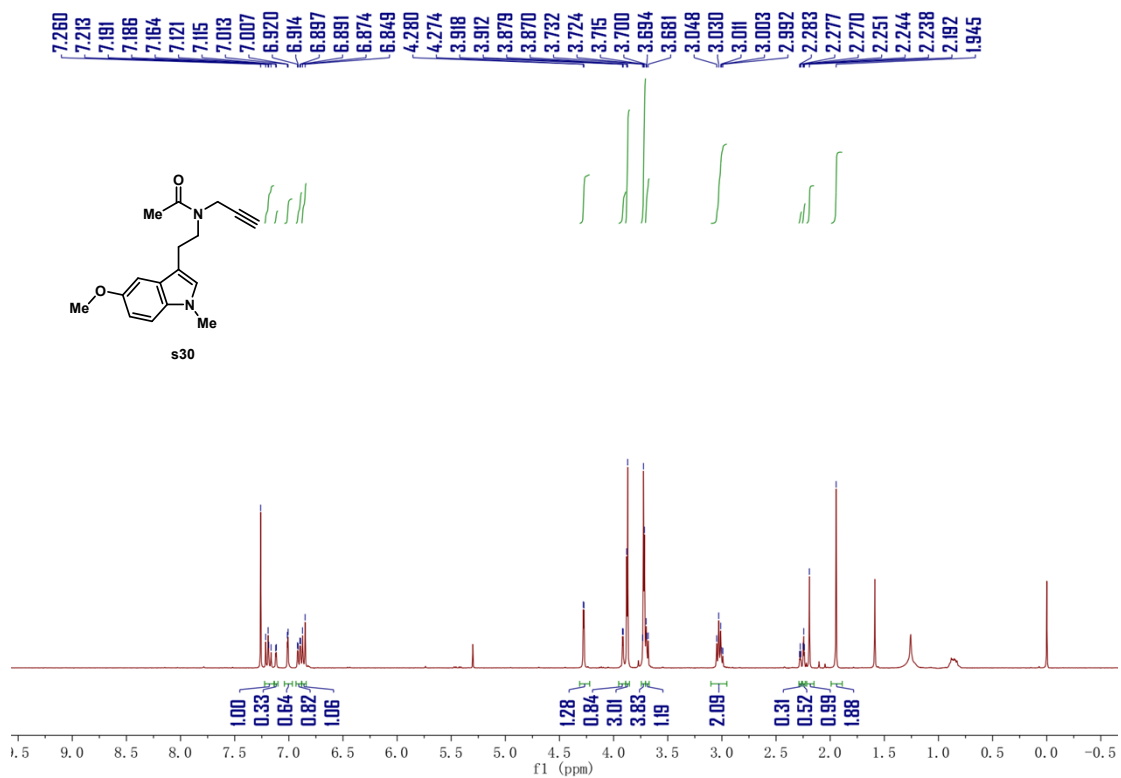



**<sup>13</sup>C NMR (101 MHz, CDCl<sub>3</sub>):**

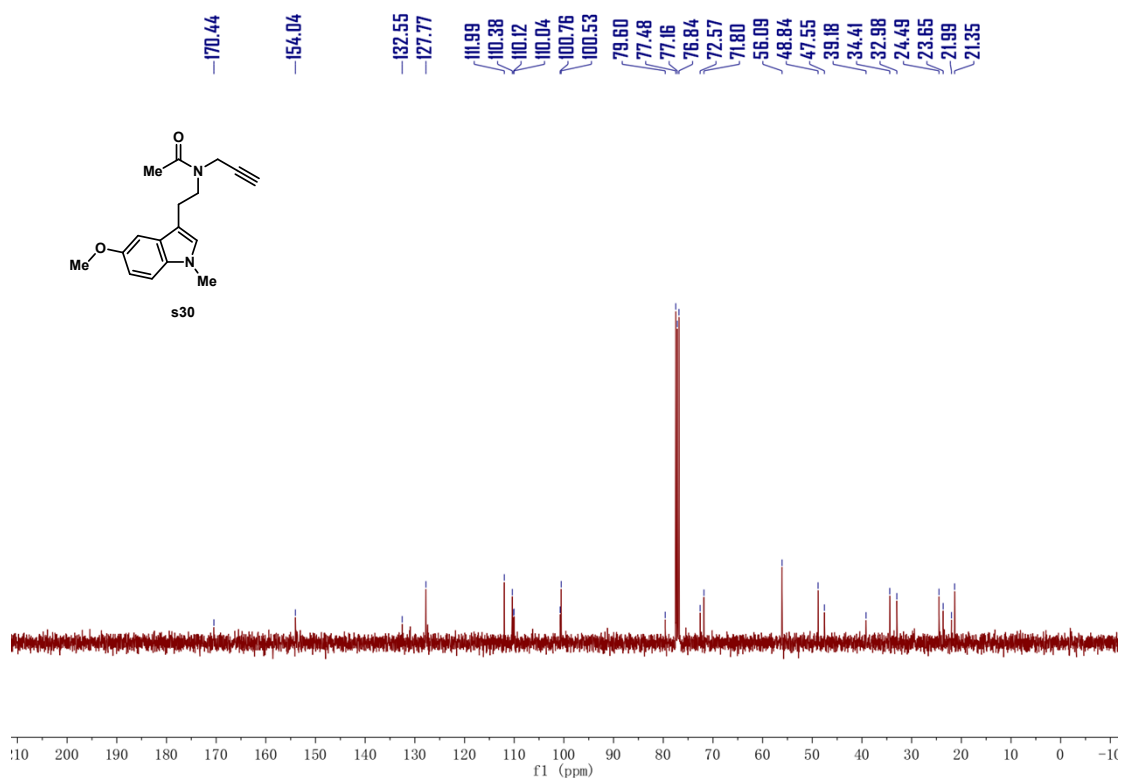

**<sup>1</sup>H NMR (400 MHz, CDCl<sub>3</sub>):**

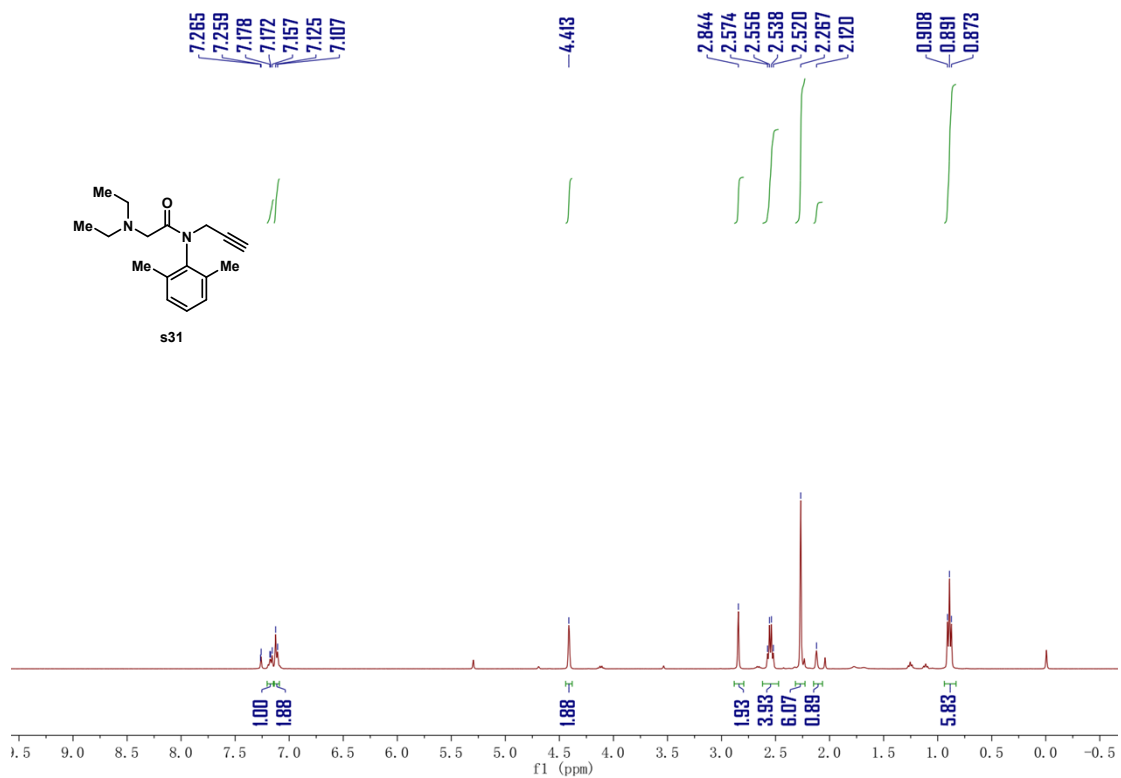

**<sup>13</sup>C NMR (101 MHz, CDCl<sub>3</sub>):**

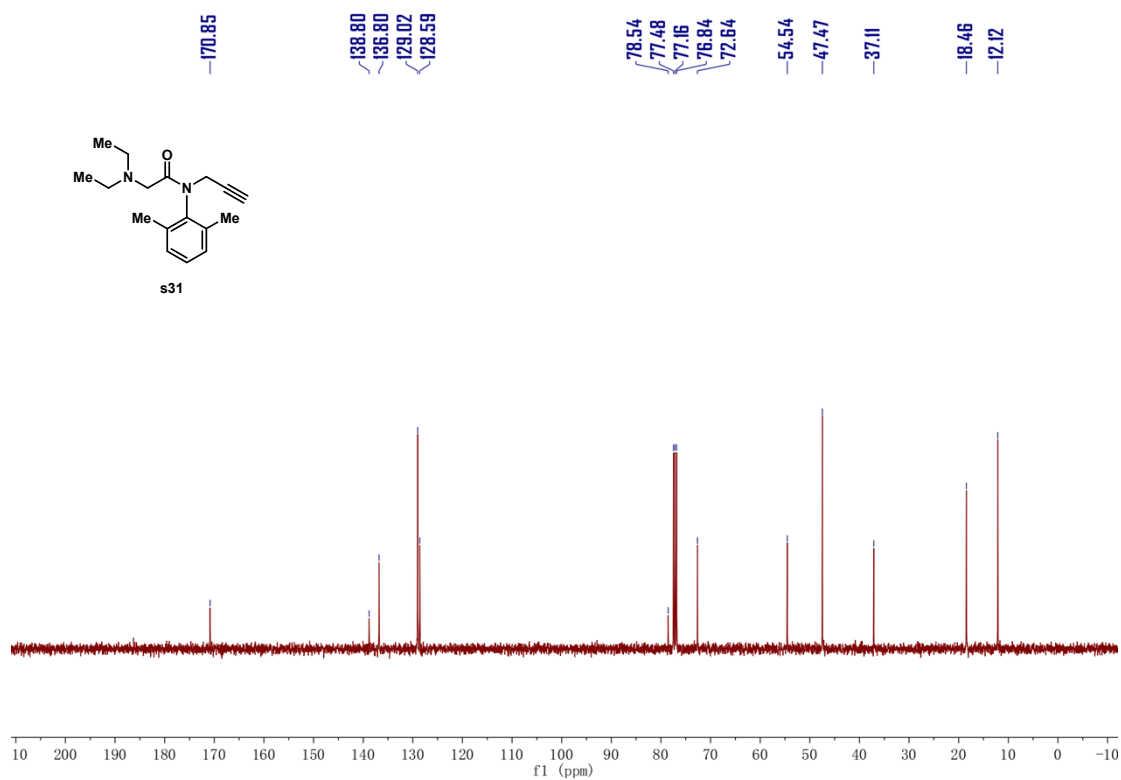

**<sup>1</sup>H NMR (400 MHz, CDCl<sub>3</sub>):**

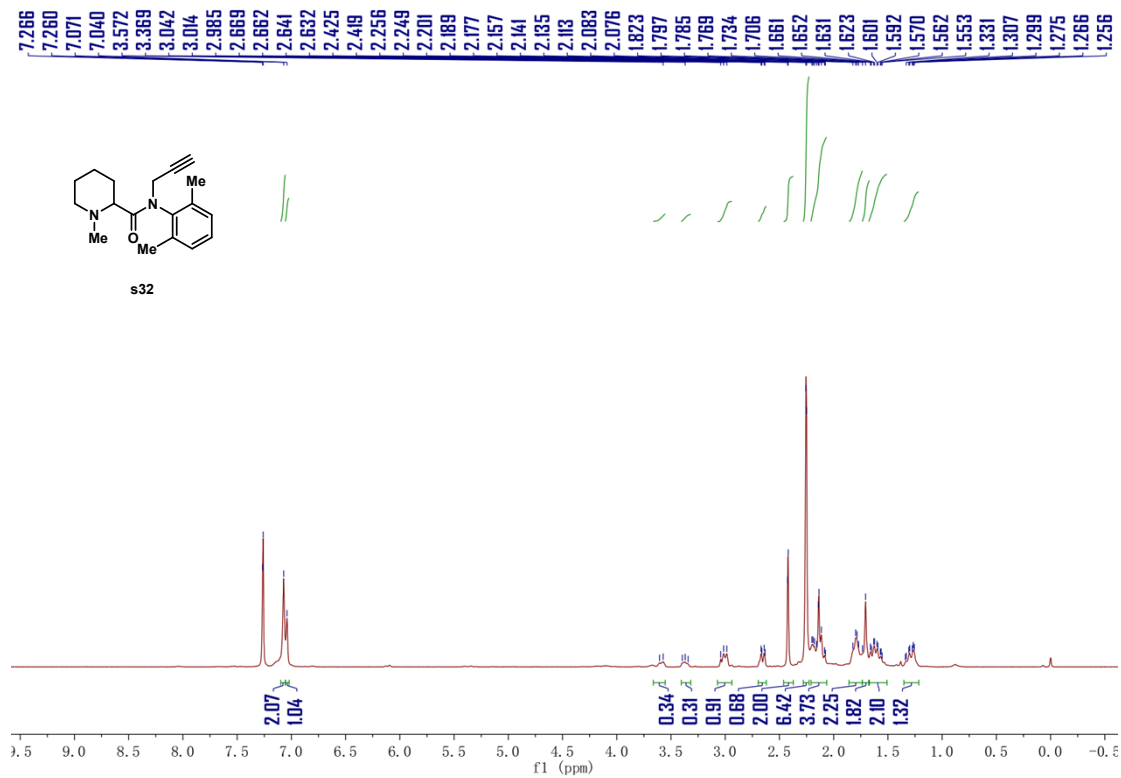

**<sup>13</sup>C NMR (101 MHz, CDCl<sub>3</sub>):**

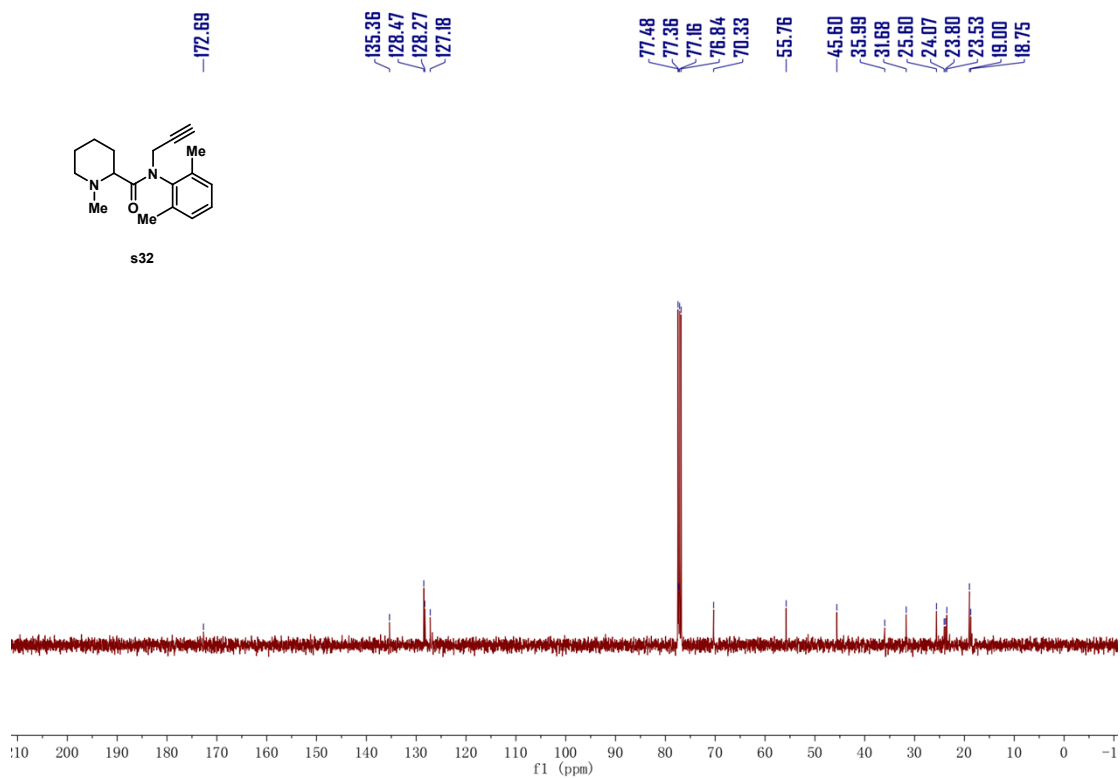

**<sup>1</sup>H NMR (400 MHz, CDCl<sub>3</sub>):**

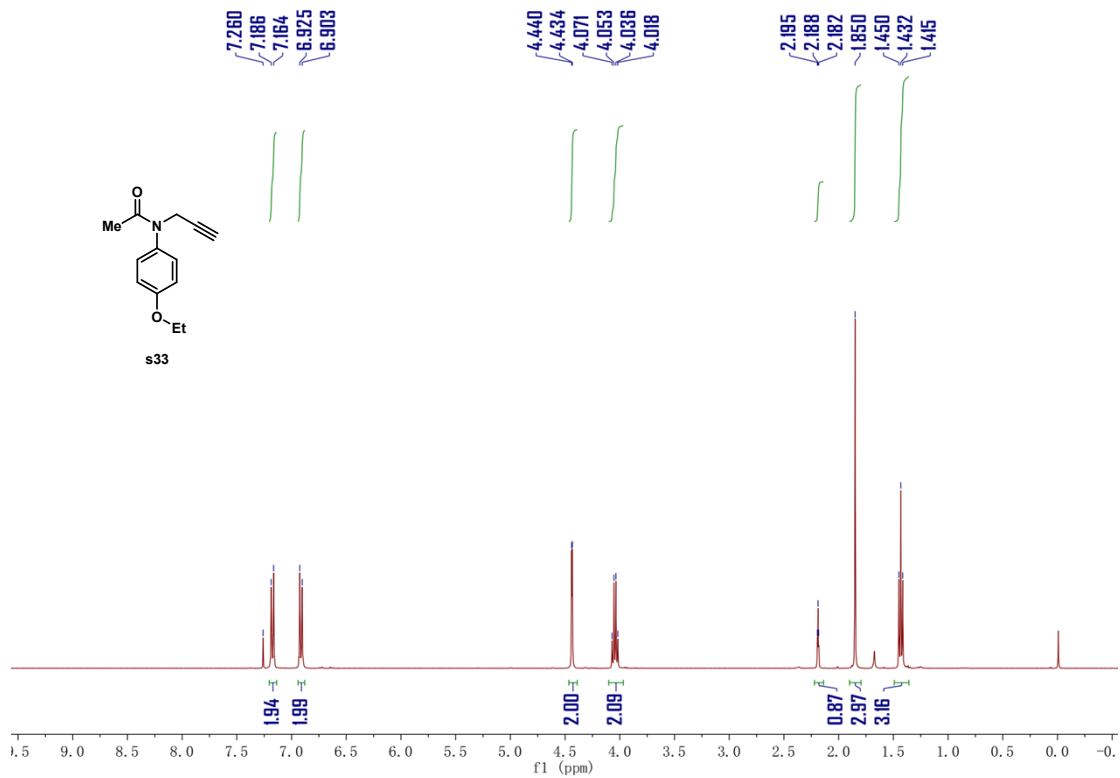

**<sup>13</sup>C NMR (101 MHz, CDCl<sub>3</sub>):**

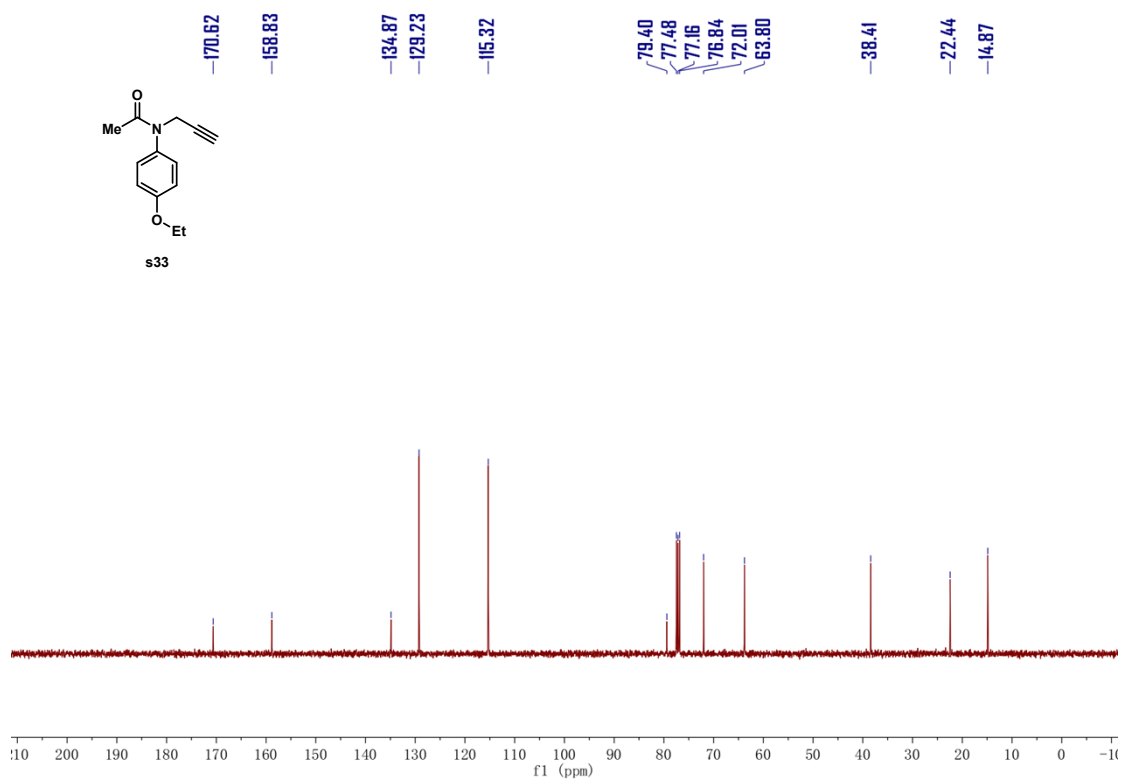

**<sup>1</sup>H NMR (400 MHz, CDCl<sub>3</sub>):**

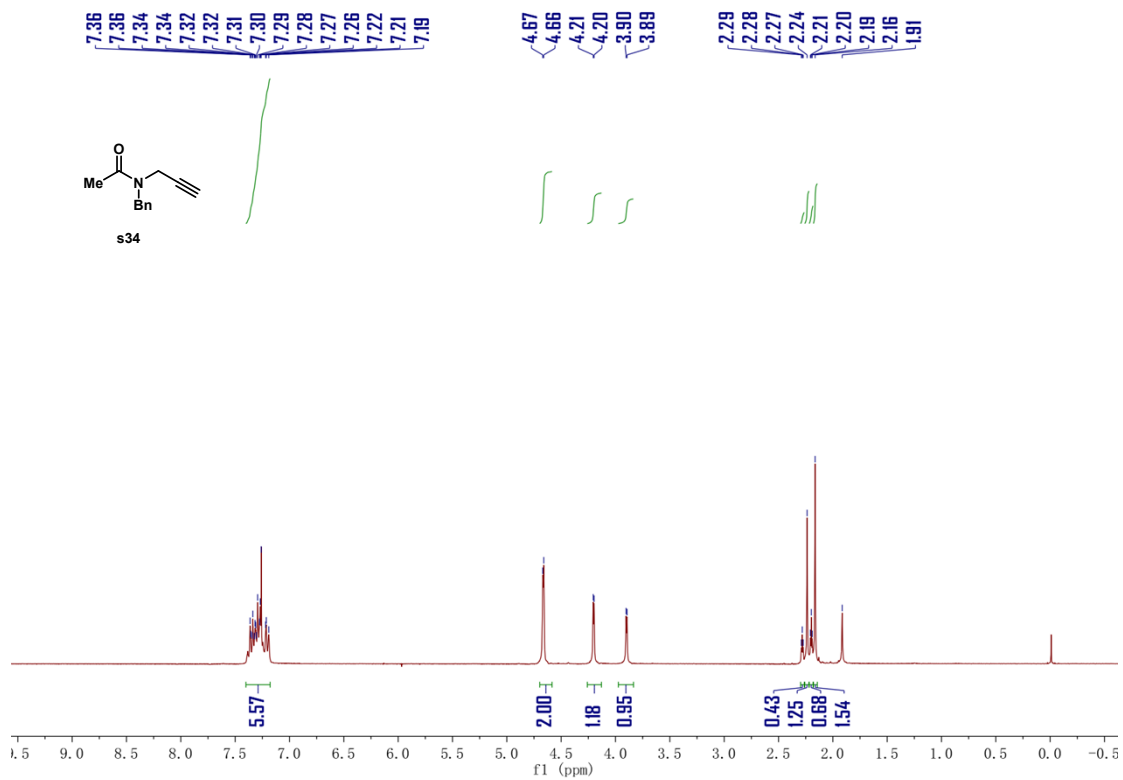

**<sup>1</sup>H NMR (400 MHz, CDCl<sub>3</sub>):**

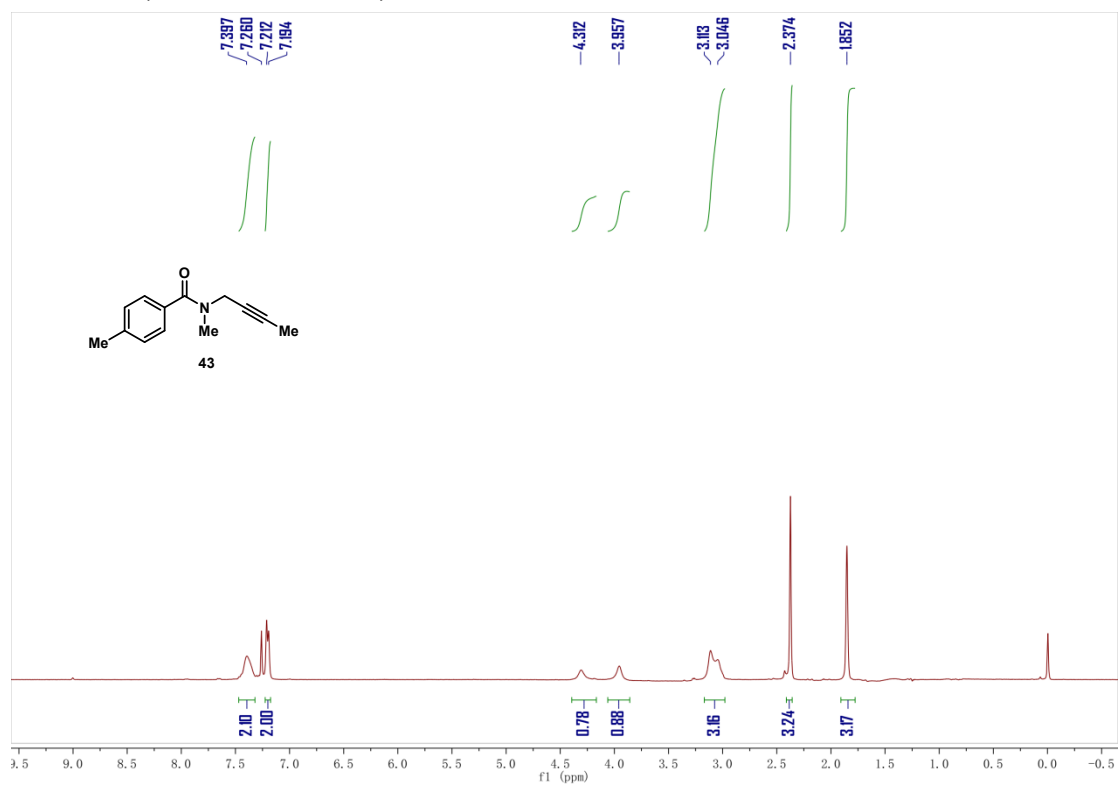

**<sup>13</sup>C NMR (101 MHz, CDCl<sub>3</sub>):**

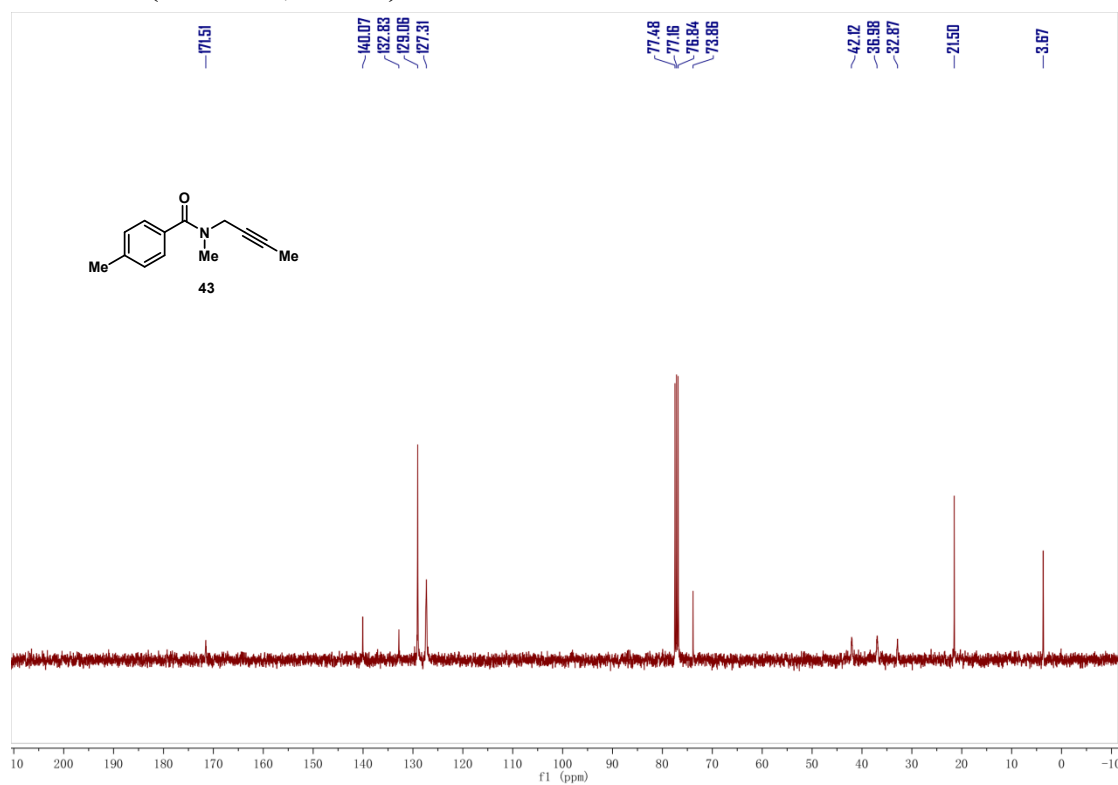

**<sup>1</sup>H NMR (400 MHz, CDCl<sub>3</sub>):**

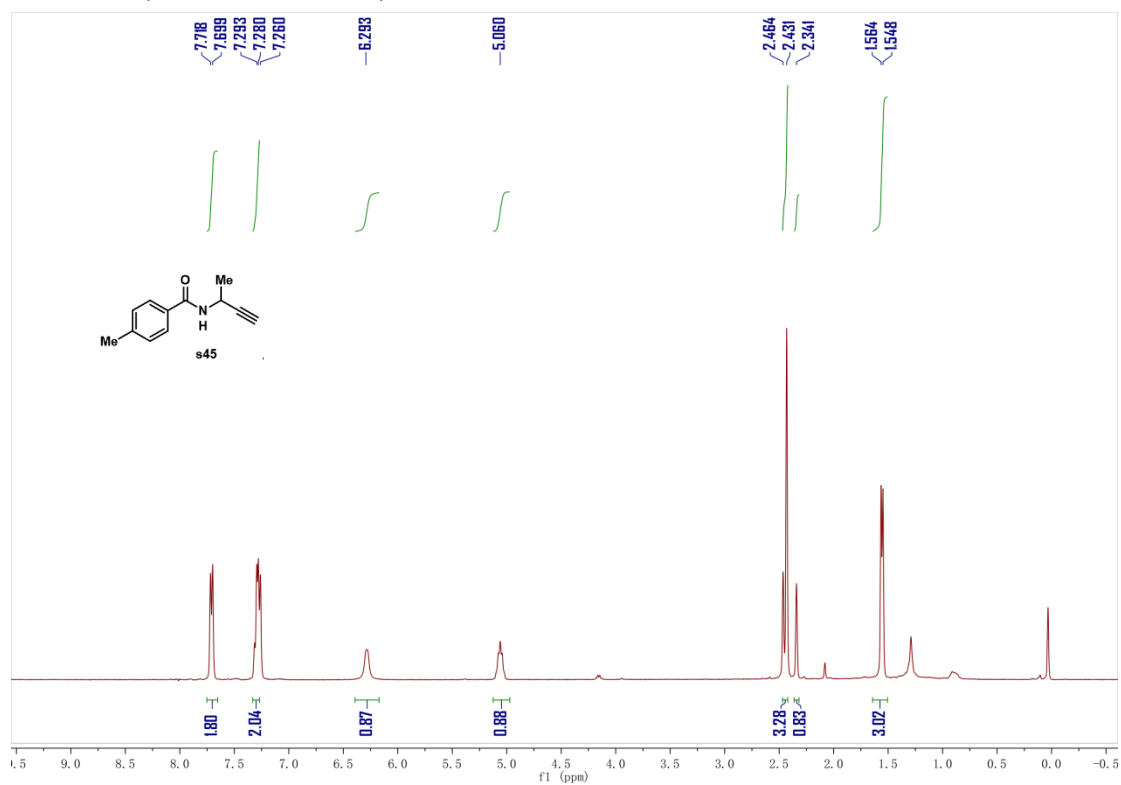

**<sup>1</sup>H NMR (400 MHz, CDCl<sub>3</sub>):**

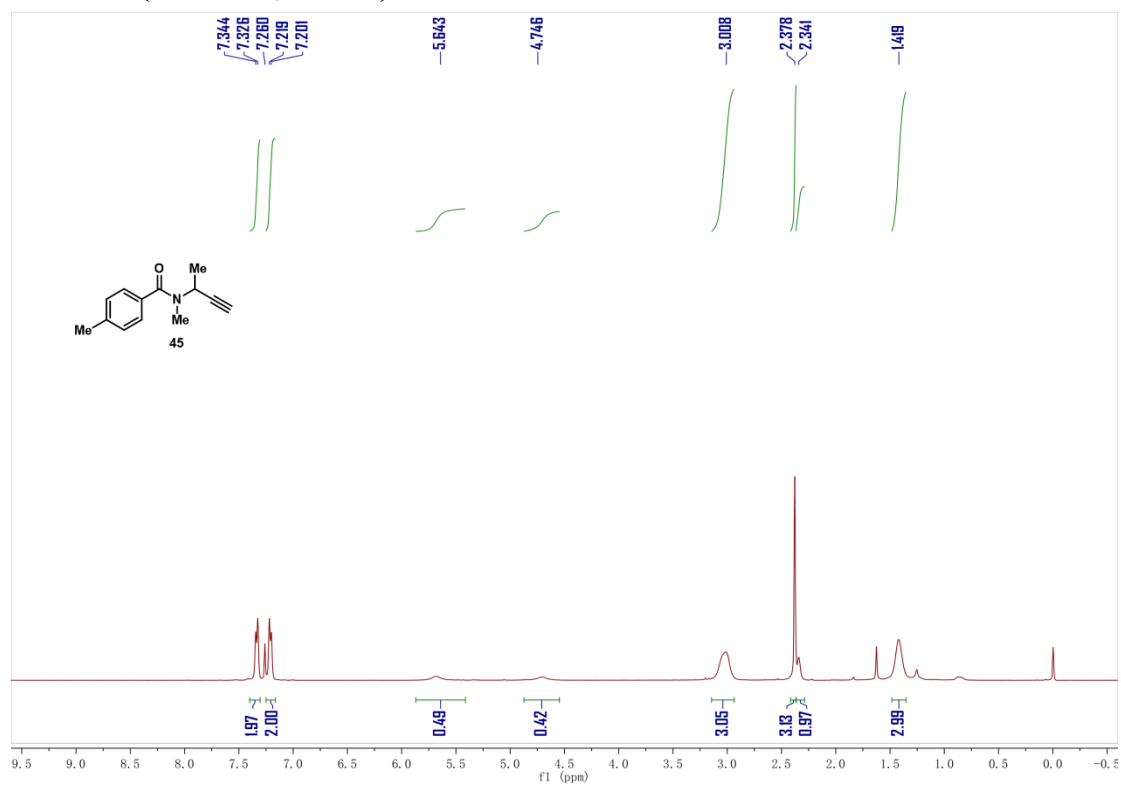

**<sup>13</sup>C NMR (101 MHz, CDCl<sub>3</sub>):**

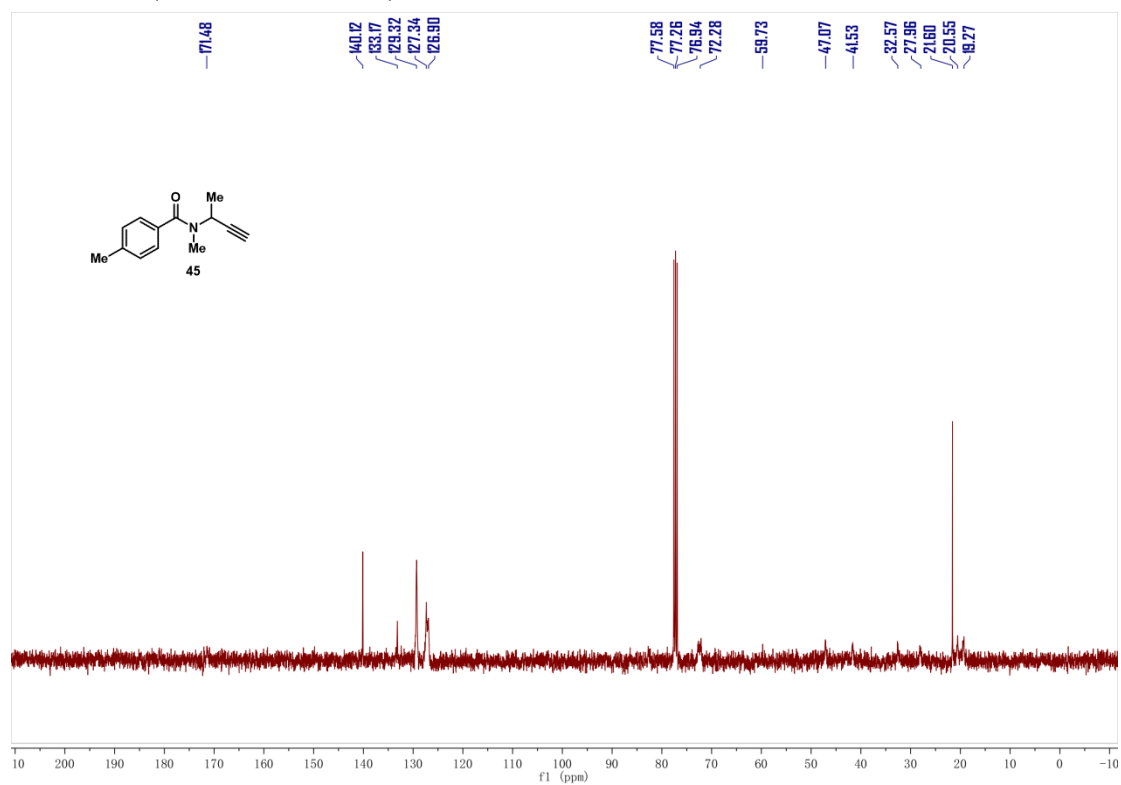

**<sup>1</sup>H NMR (400 MHz, CDCl<sub>3</sub>):**

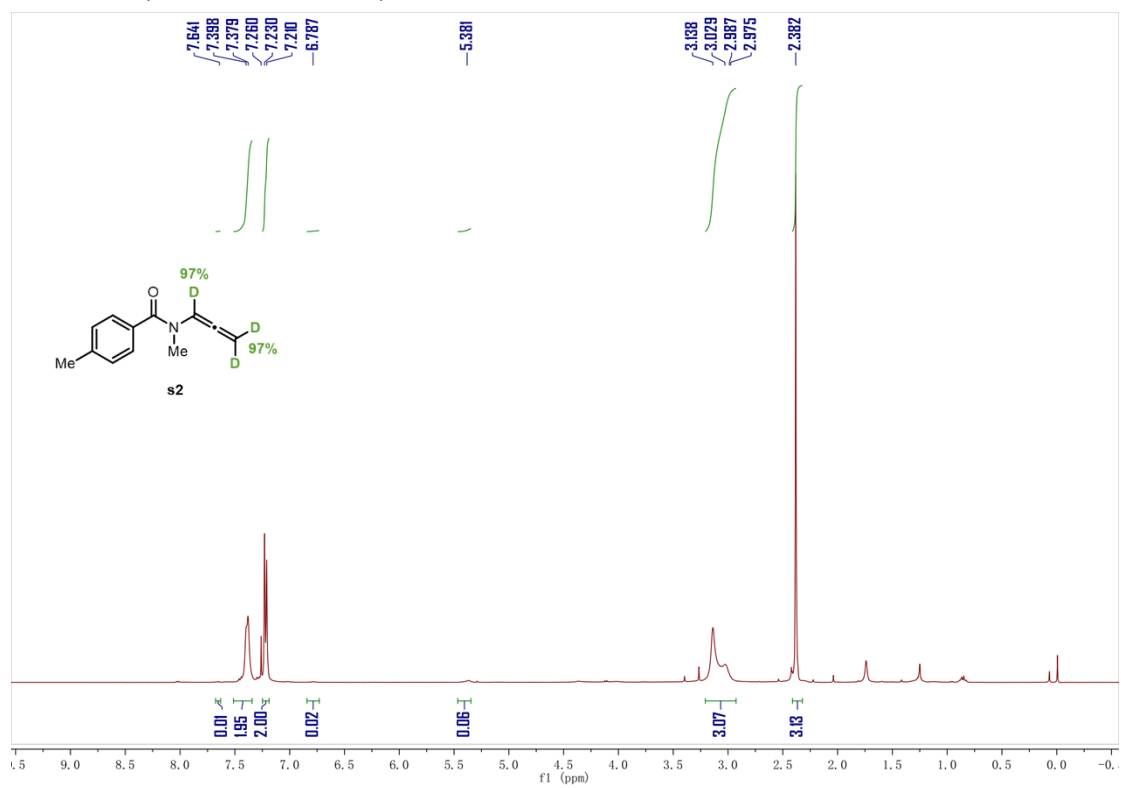

### $^{13}\text{C}$ NMR (101 MHz, $\text{CDCl}_3$ ):

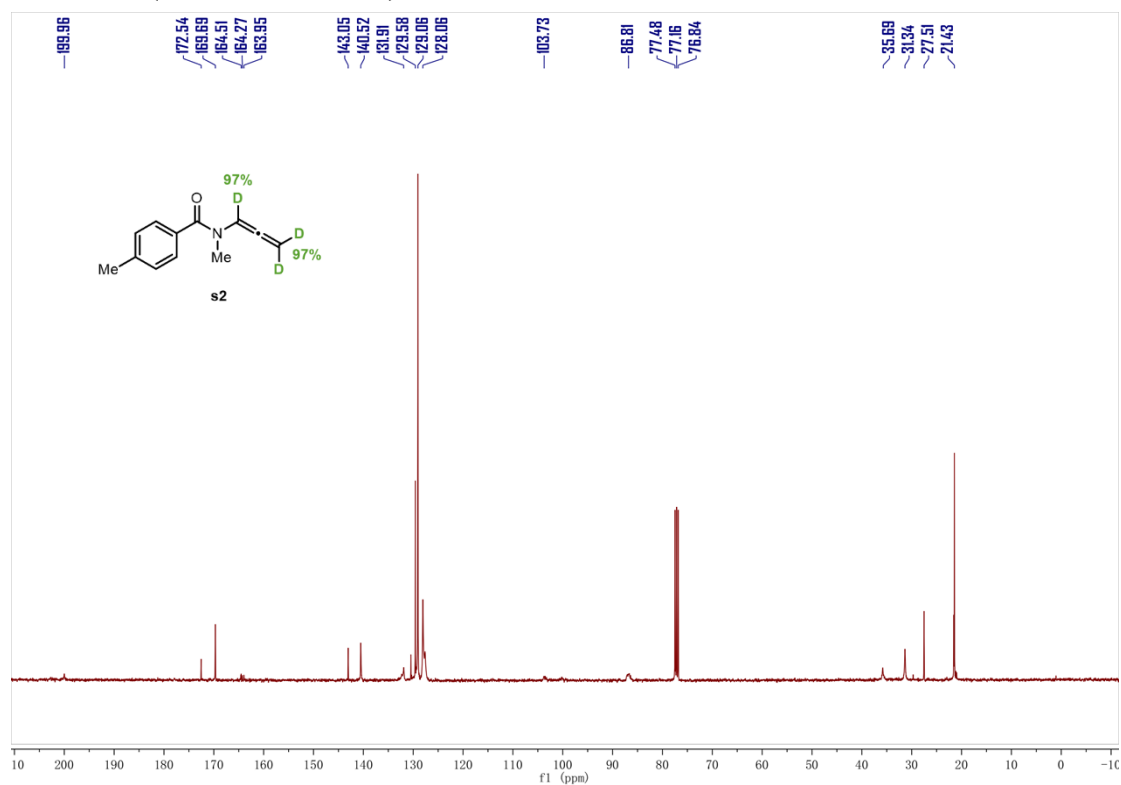

### $^1\text{H}$ NMR (400 MHz, $\text{CDCl}_3$ ):

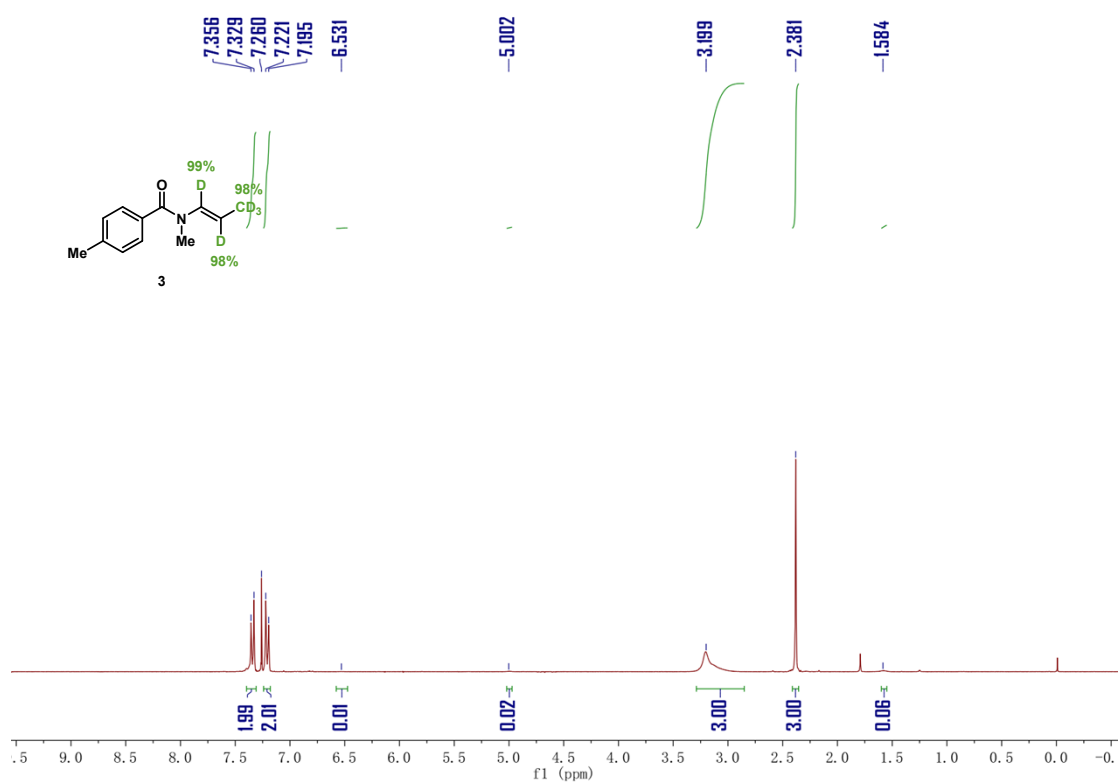



**<sup>13</sup>C NMR (101 MHz, CDCl<sub>3</sub>):**

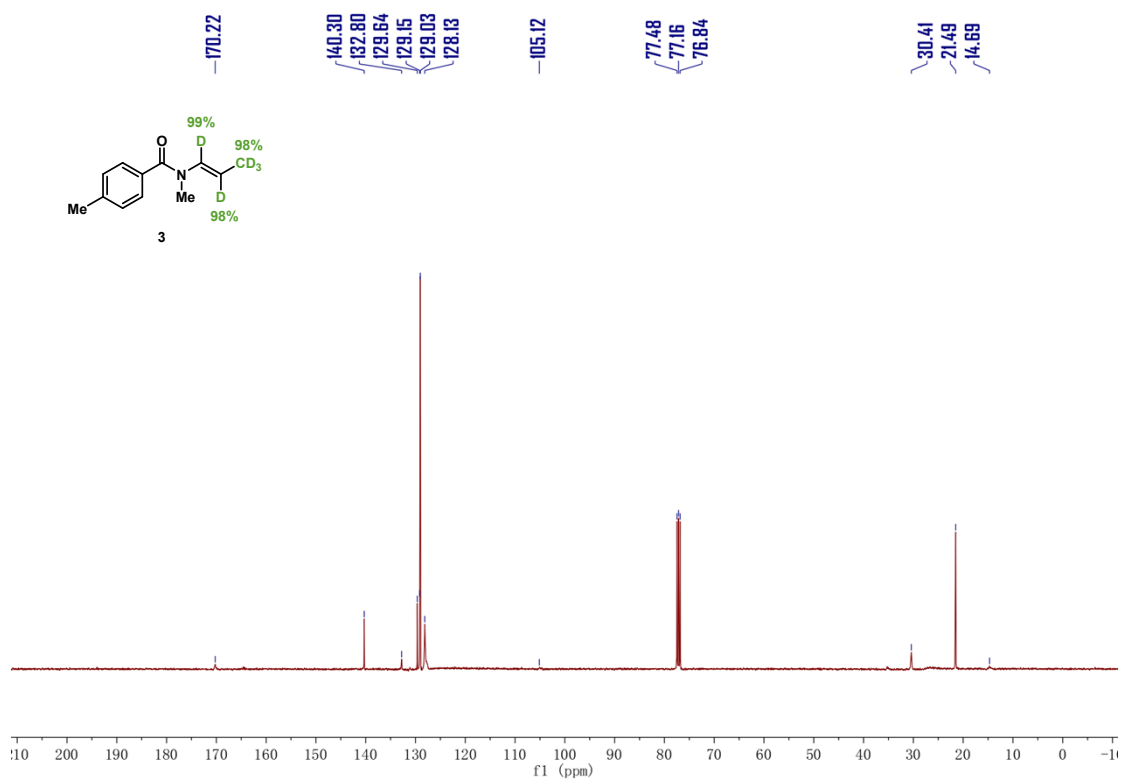

**<sup>1</sup>H NMR (400 MHz, CDCl<sub>3</sub>):**

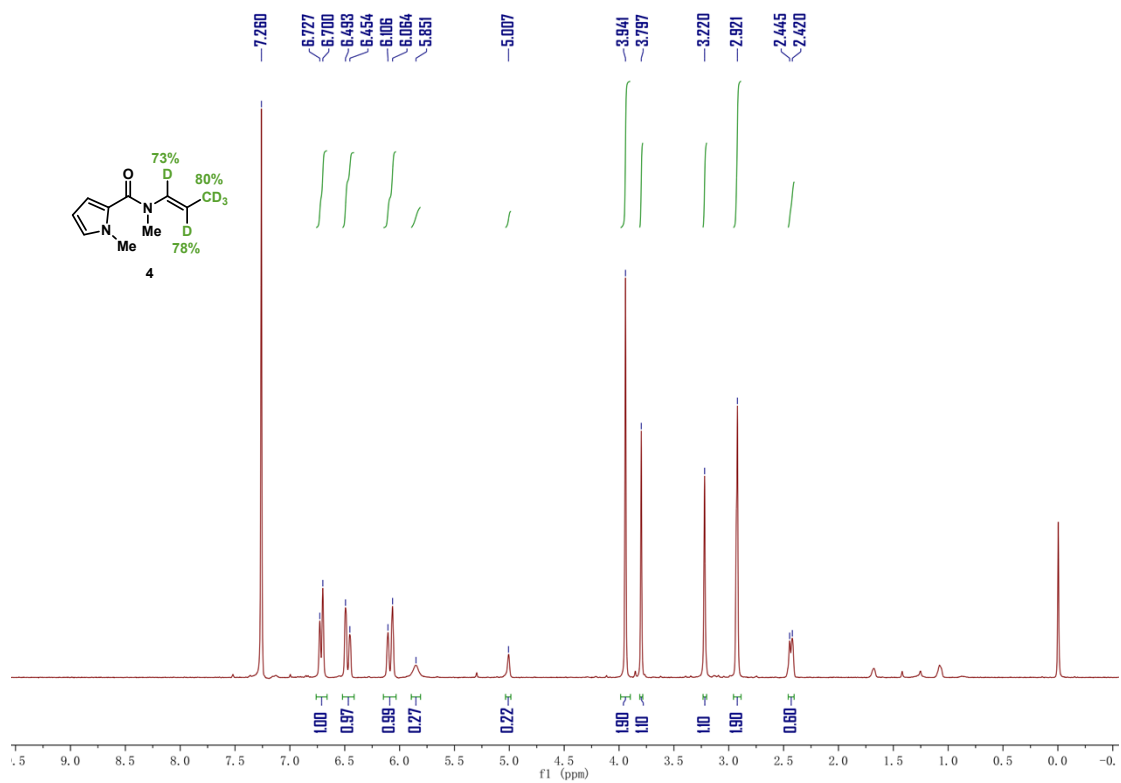

**$^{13}\text{C}$  NMR (101 MHz,  $\text{CDCl}_3$ ):**

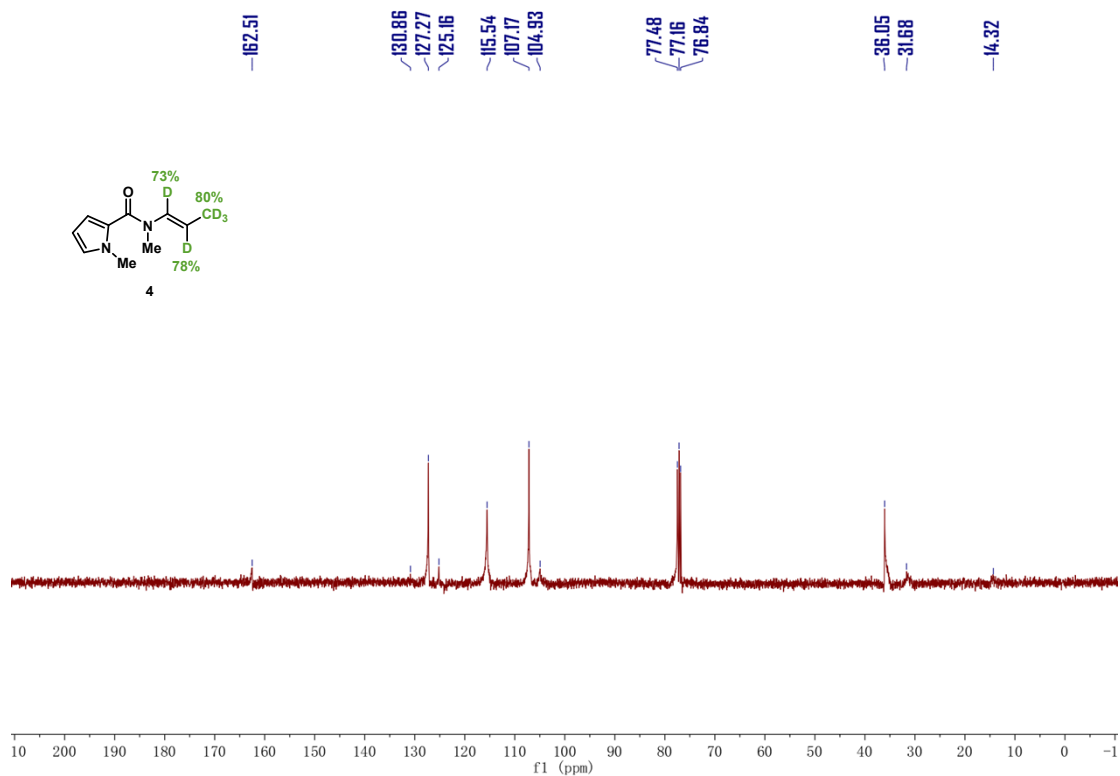

**$^1\text{H}$  NMR (400 MHz,  $\text{CDCl}_3$ ):**

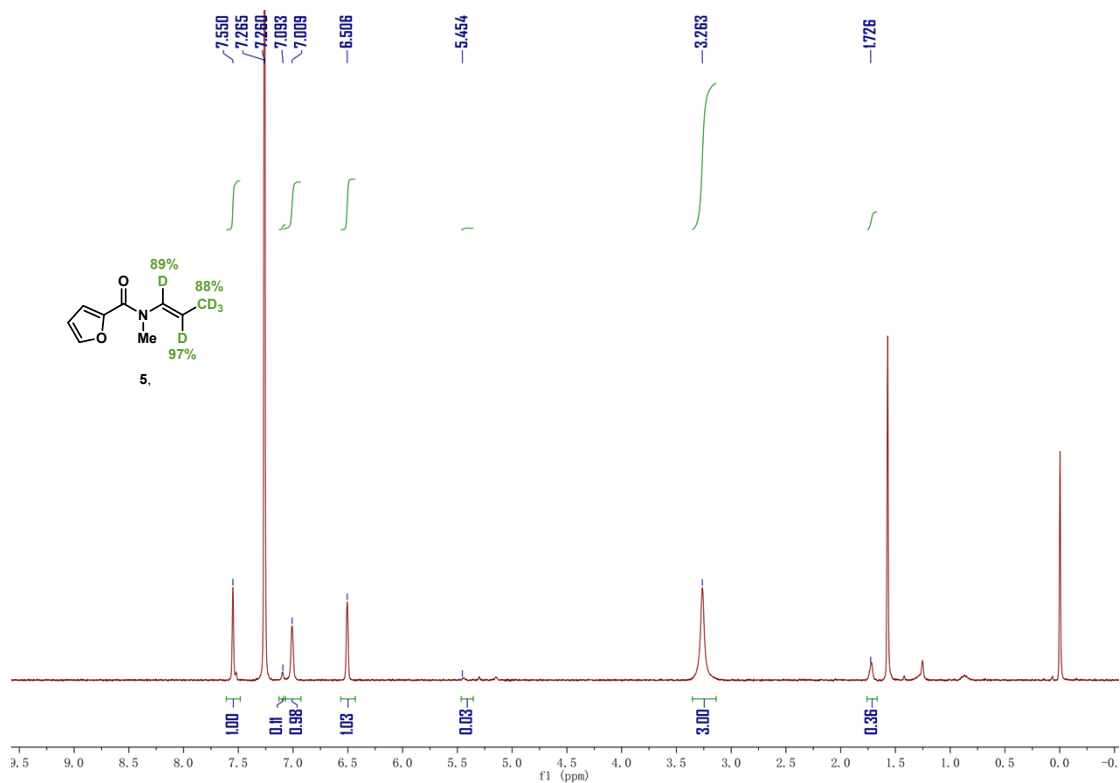

**<sup>13</sup>C NMR (101 MHz, CDCl<sub>3</sub>):**

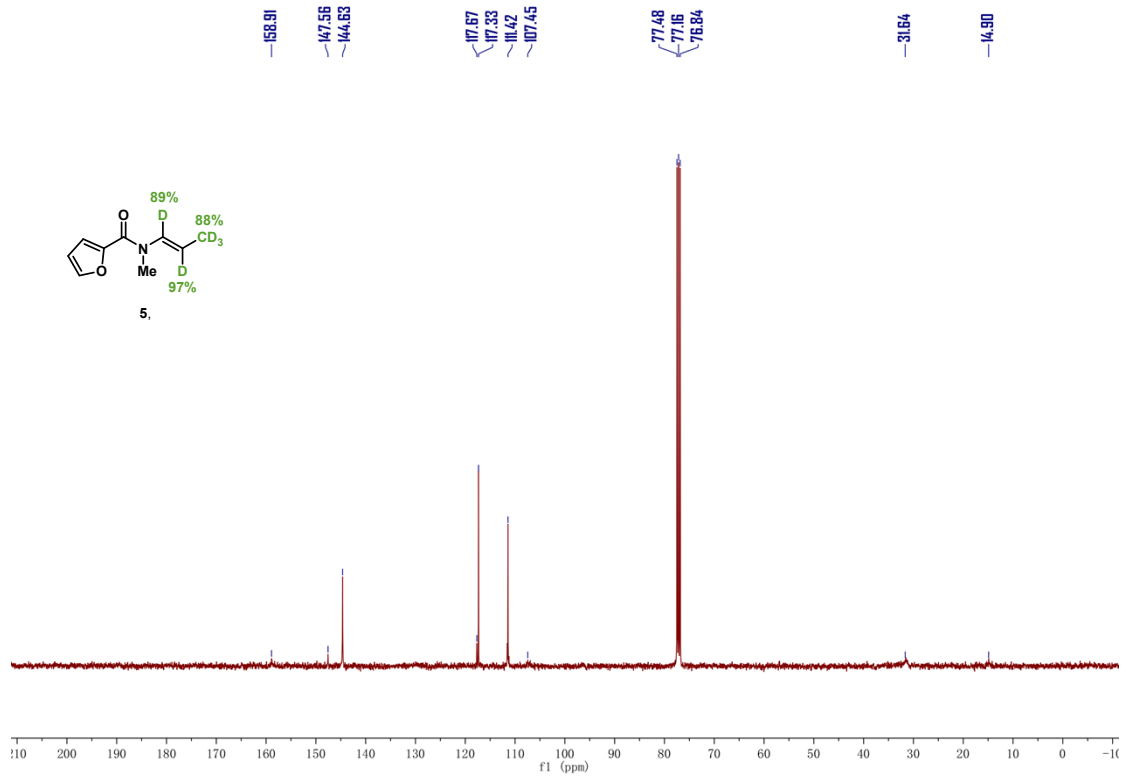

**<sup>1</sup>H NMR (400 MHz, CDCl<sub>3</sub>):**

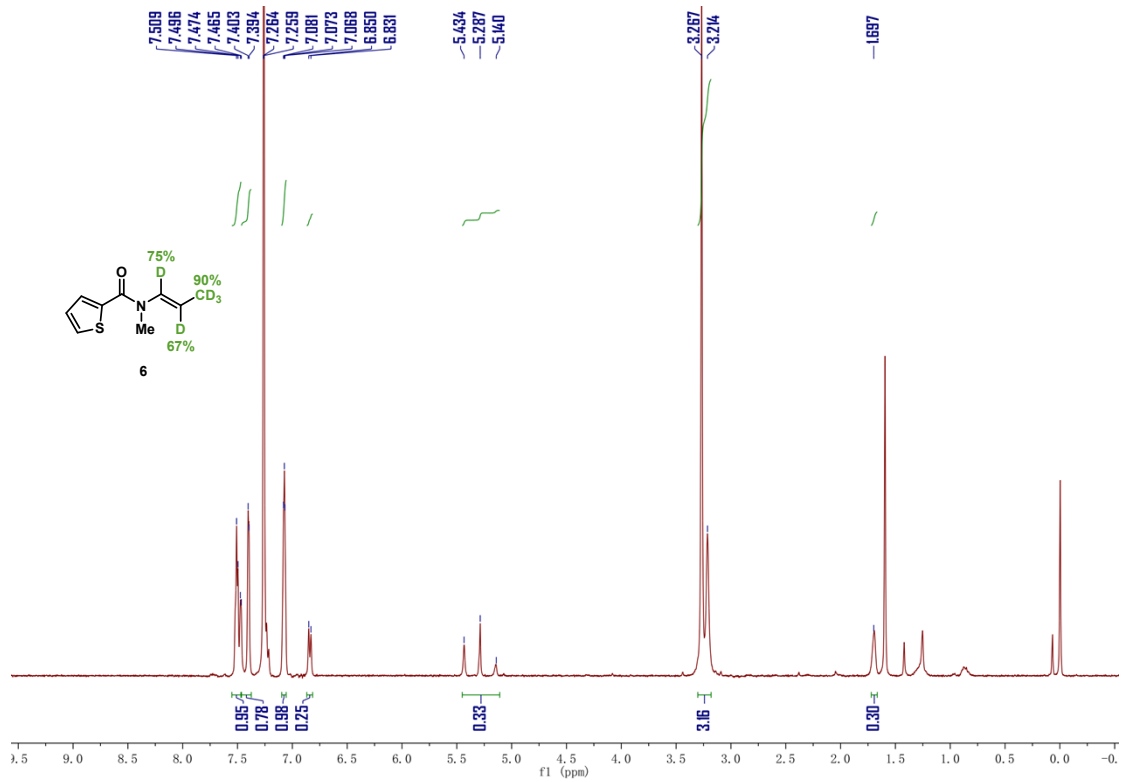

**$^{13}\text{C}$  NMR (101 MHz,  $\text{CDCl}_3$ ):**

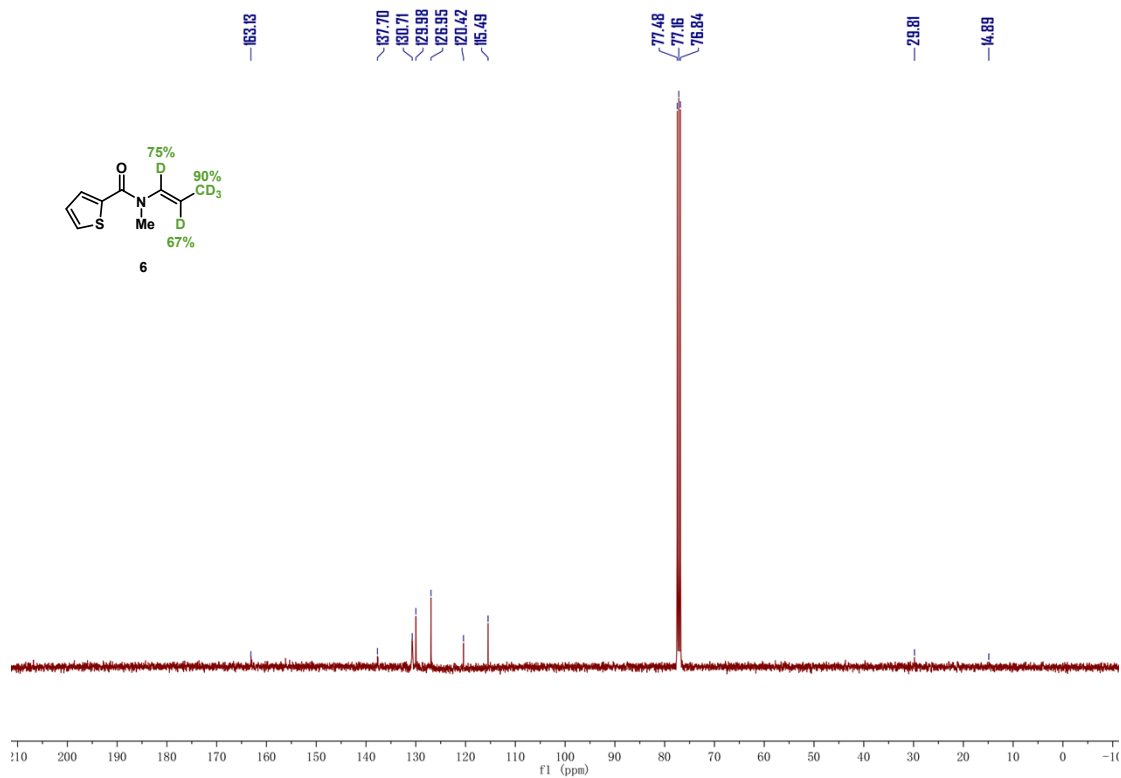

**$^1\text{H}$  NMR (400 MHz,  $\text{CDCl}_3$ ):**

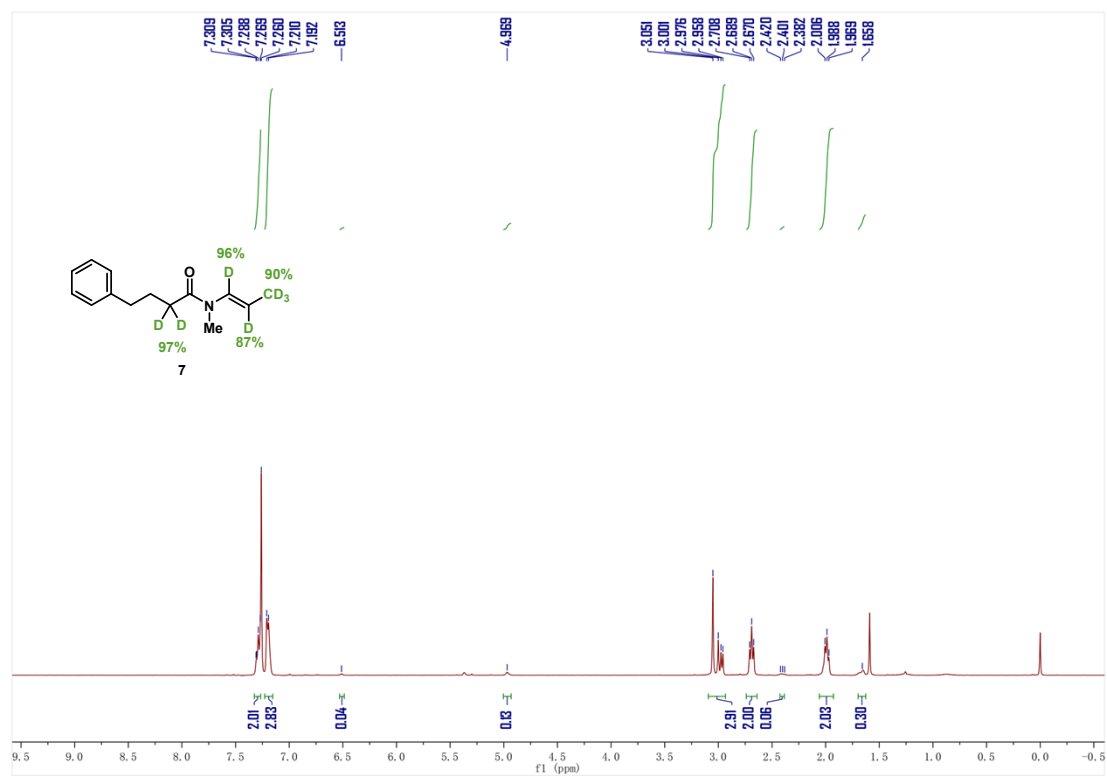

**<sup>13</sup>C NMR (101 MHz, CDCl<sub>3</sub>):**

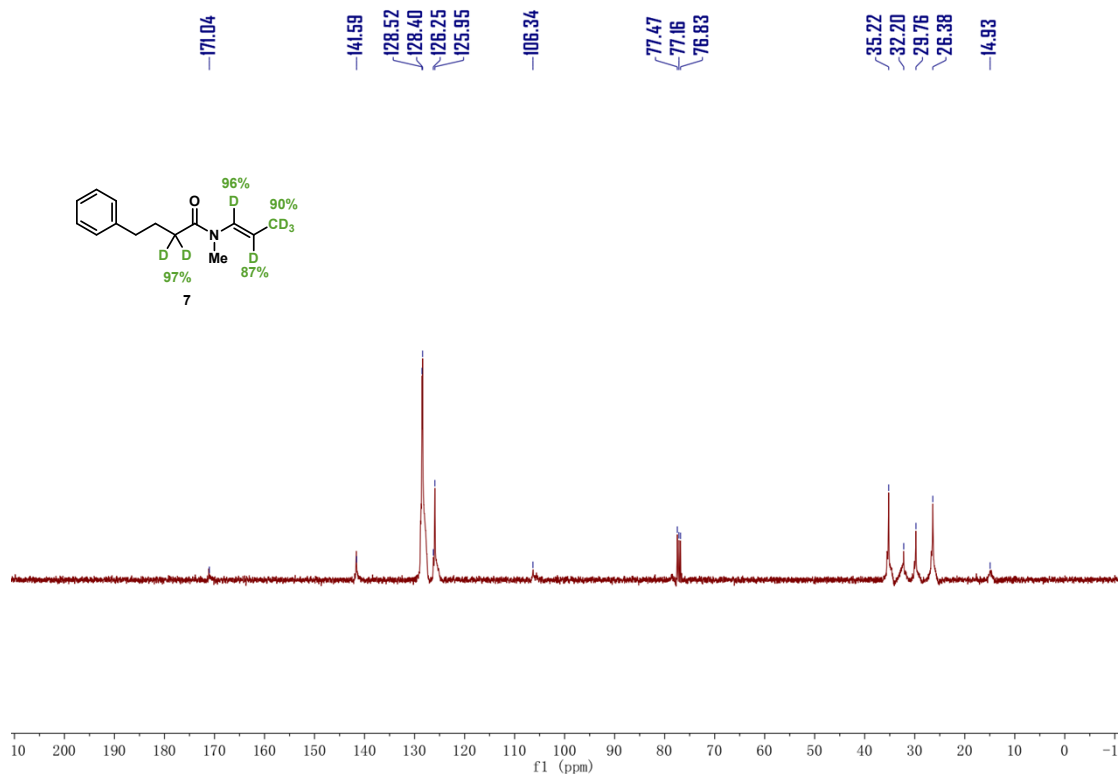

**<sup>1</sup>H NMR (400 MHz, CDCl<sub>3</sub>):**

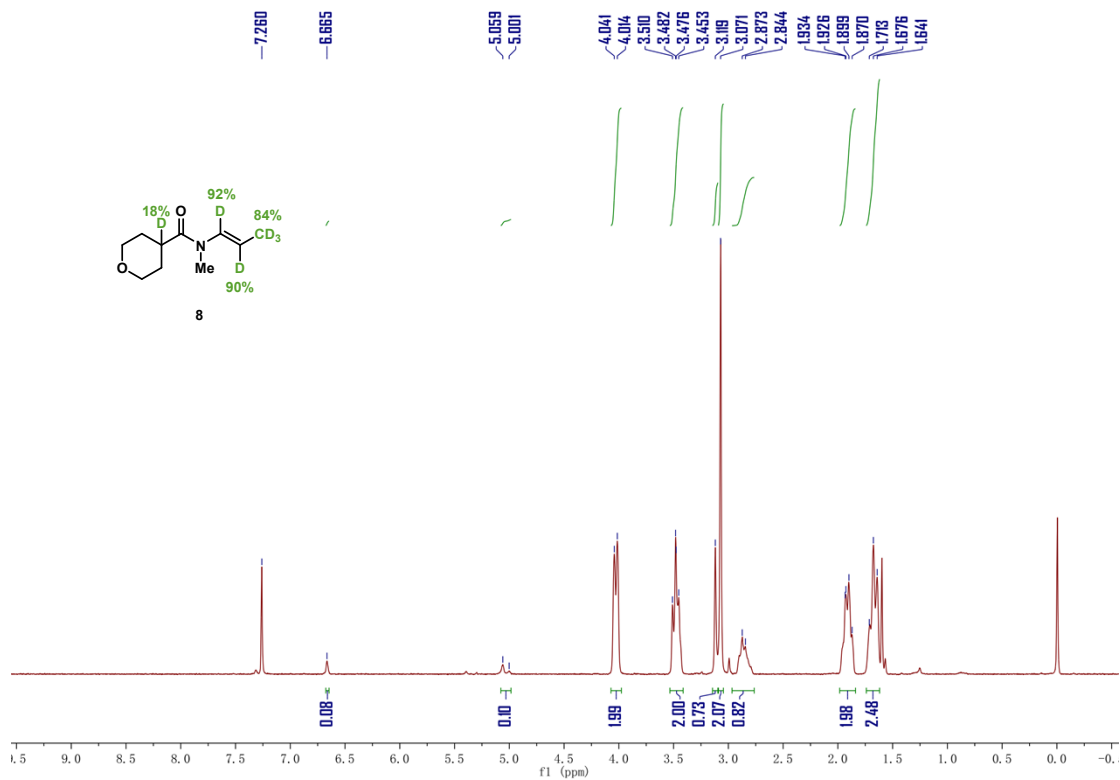

**$^{13}\text{C}$  NMR (101 MHz,  $\text{CDCl}_3$ ):**

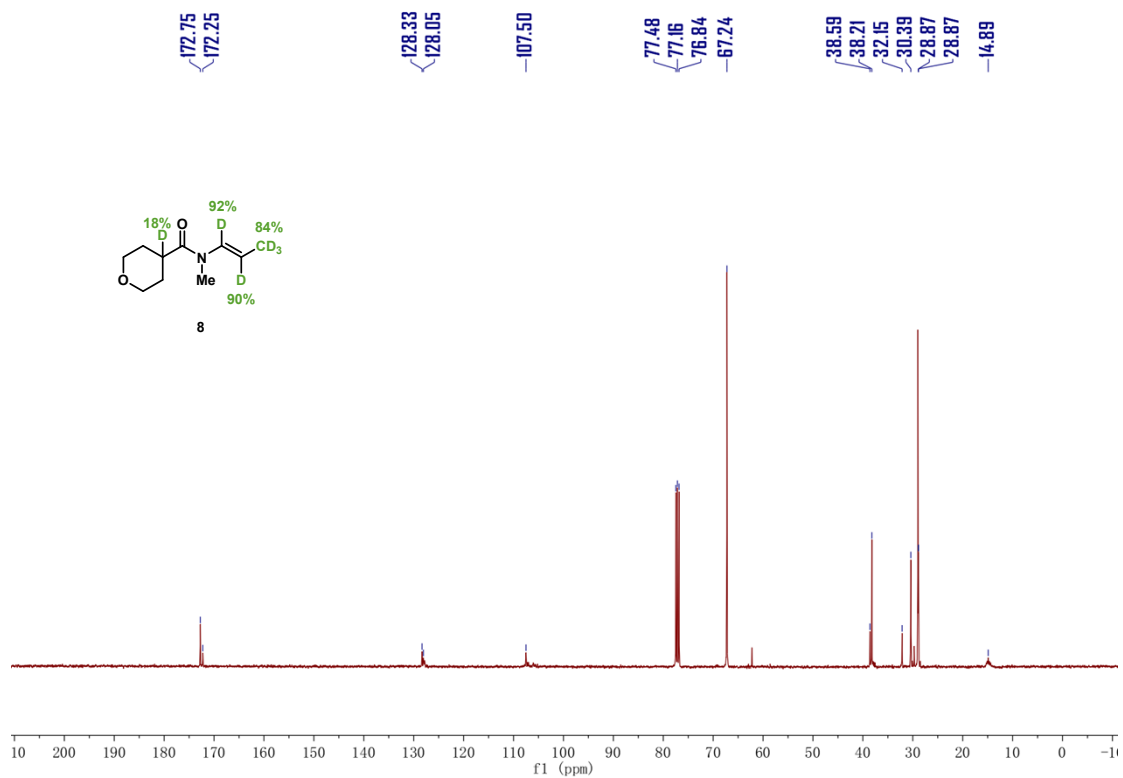

**$^1\text{H}$  NMR (400 MHz,  $\text{CDCl}_3$ ):**

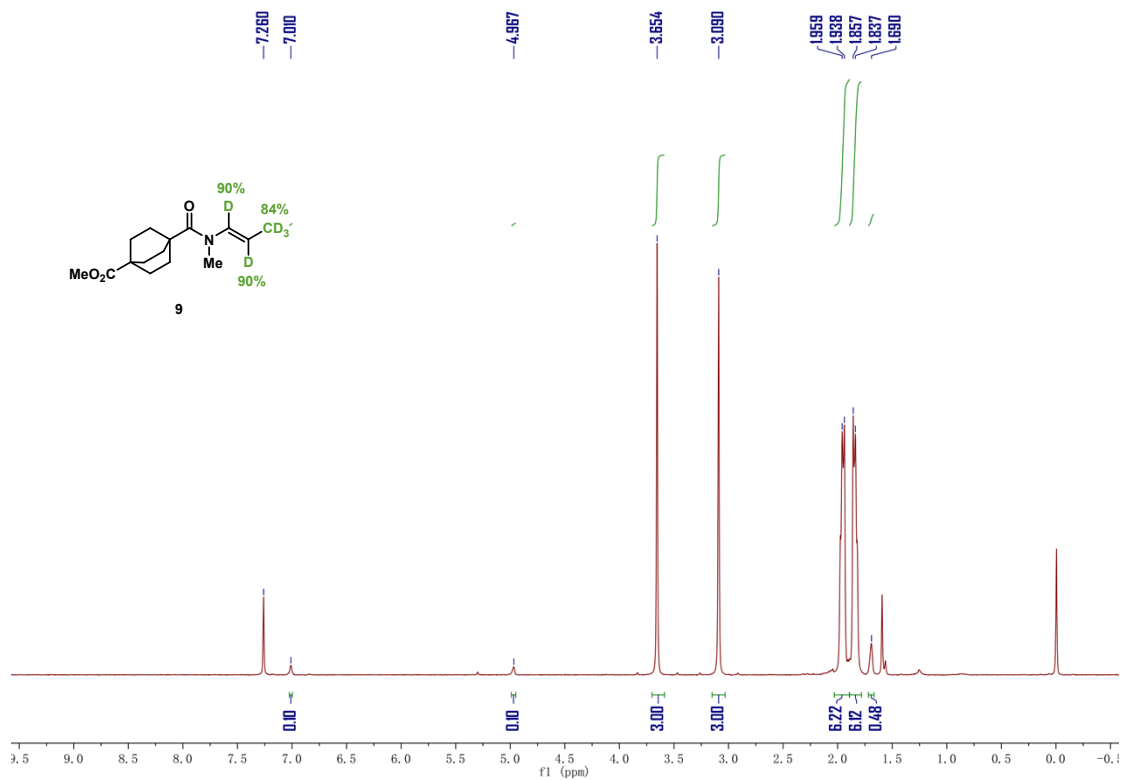

### $^{13}\text{C}$ NMR (101 MHz, $\text{CDCl}_3$ ):

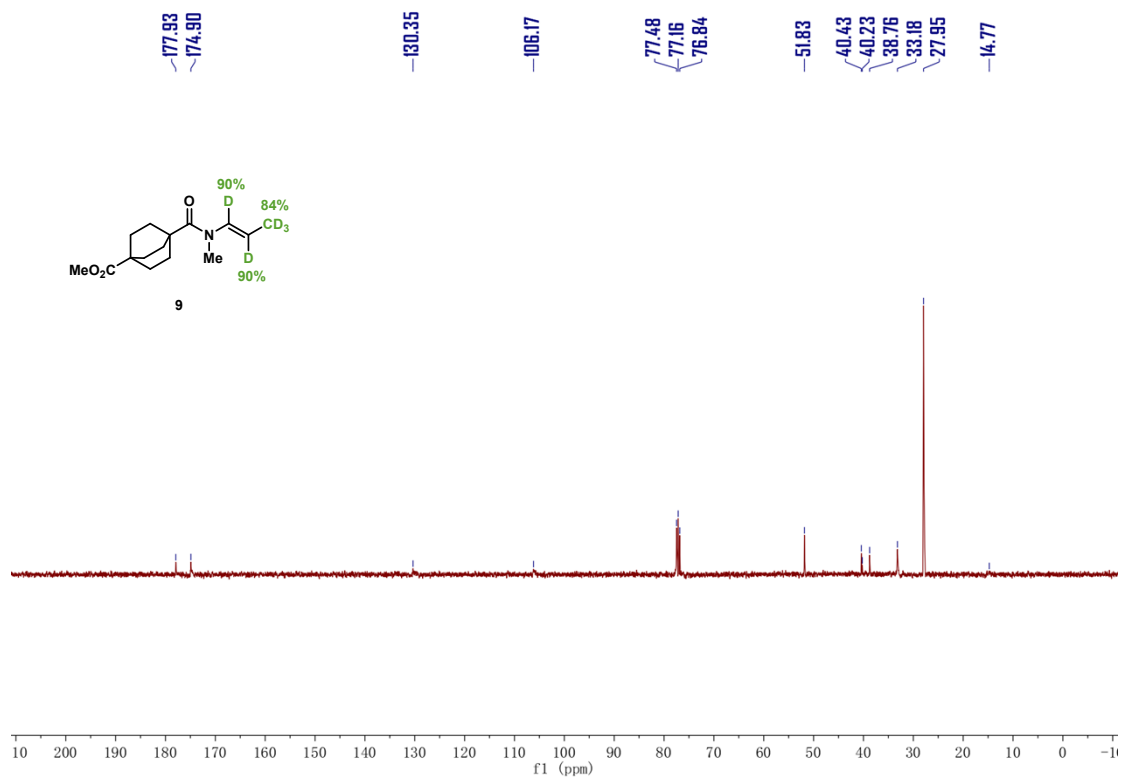

### $^1\text{H}$ NMR (400 MHz, $\text{CDCl}_3$ ):

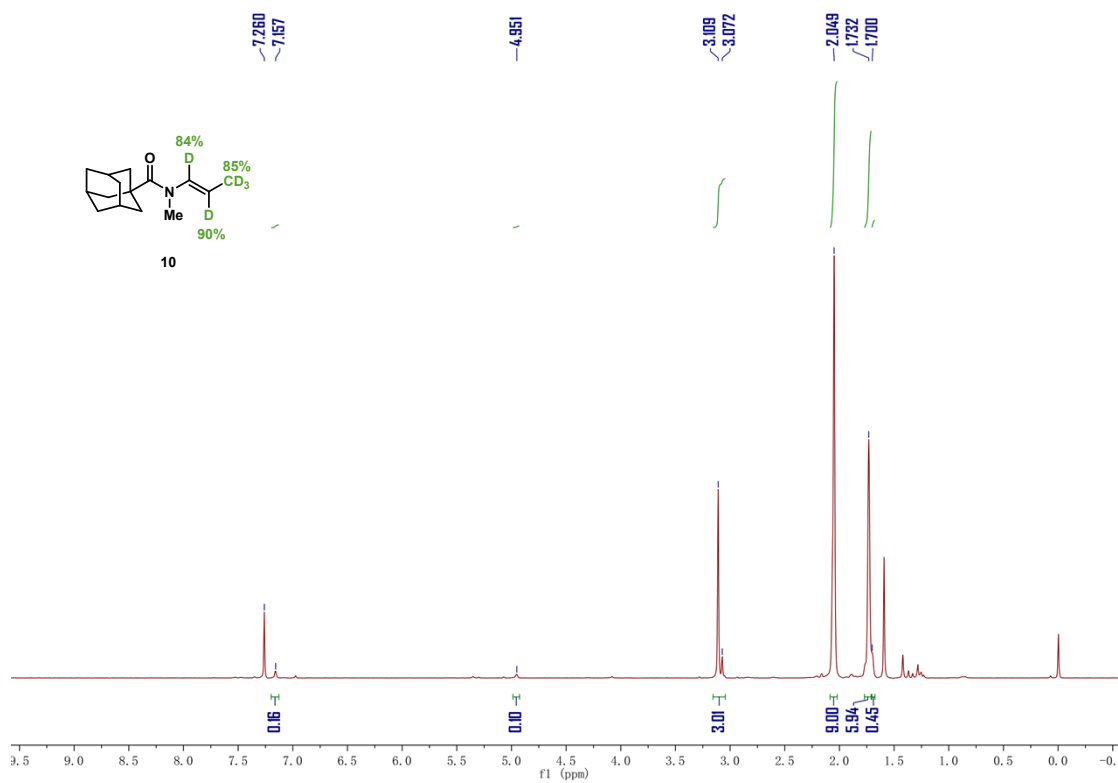

**<sup>13</sup>C NMR (101 MHz, CDCl<sub>3</sub>):**

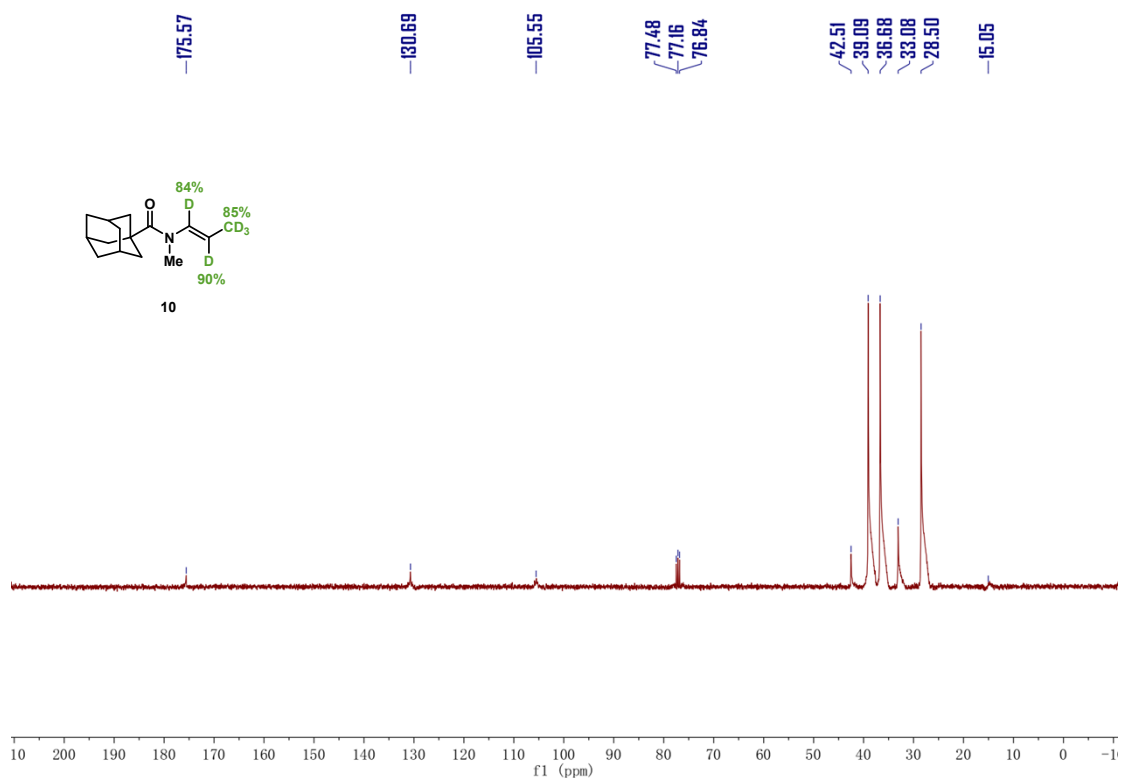

**<sup>1</sup>H NMR (400 MHz, CDCl<sub>3</sub>):**

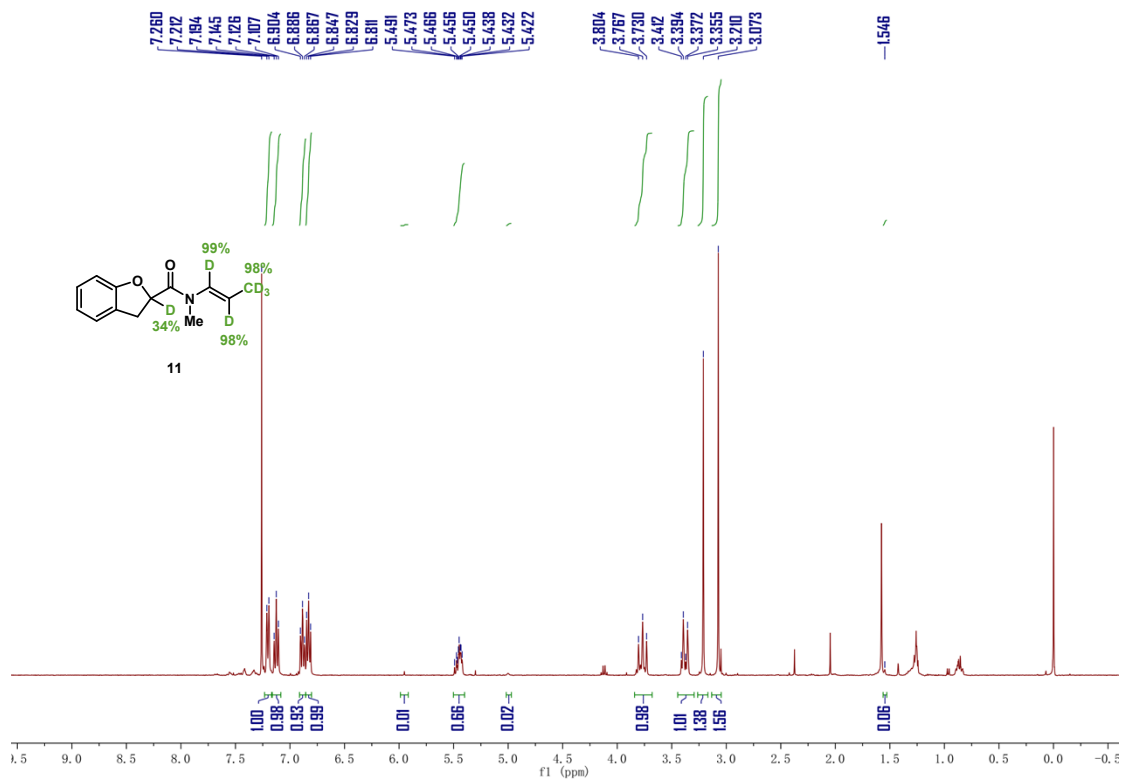



**<sup>13</sup>C NMR (101 MHz, CDCl<sub>3</sub>):**

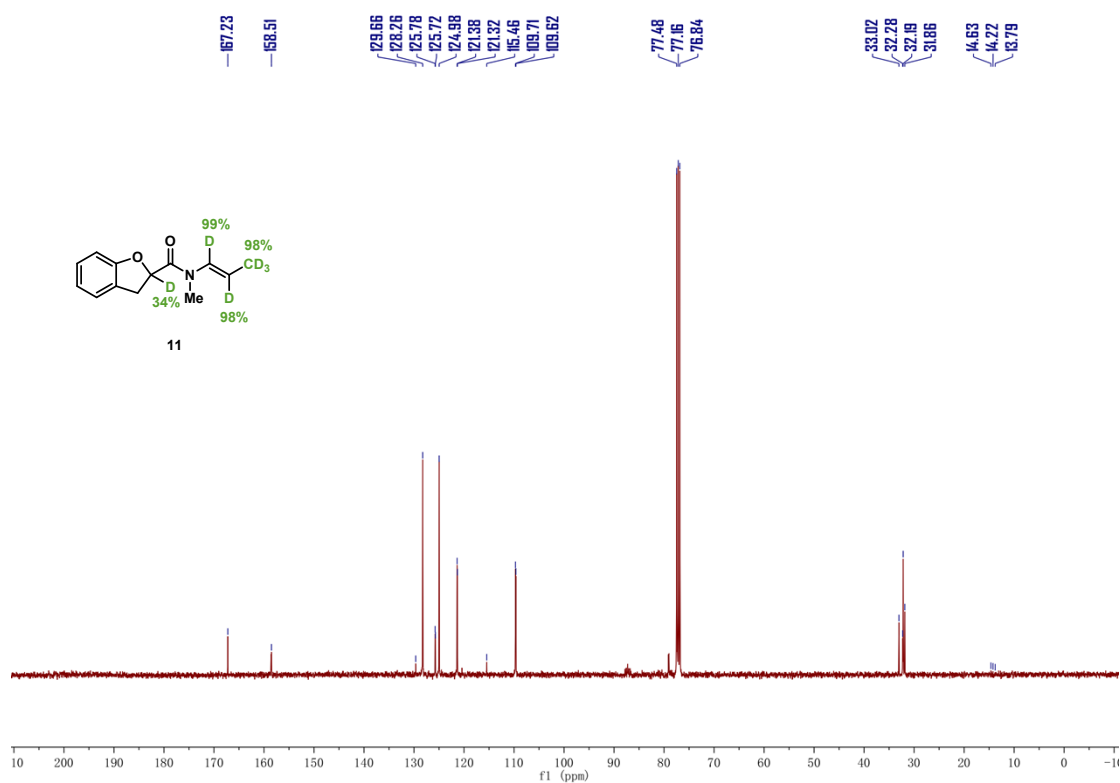

**<sup>1</sup>H NMR (400 MHz, DMSO-*d*<sub>6</sub>):**

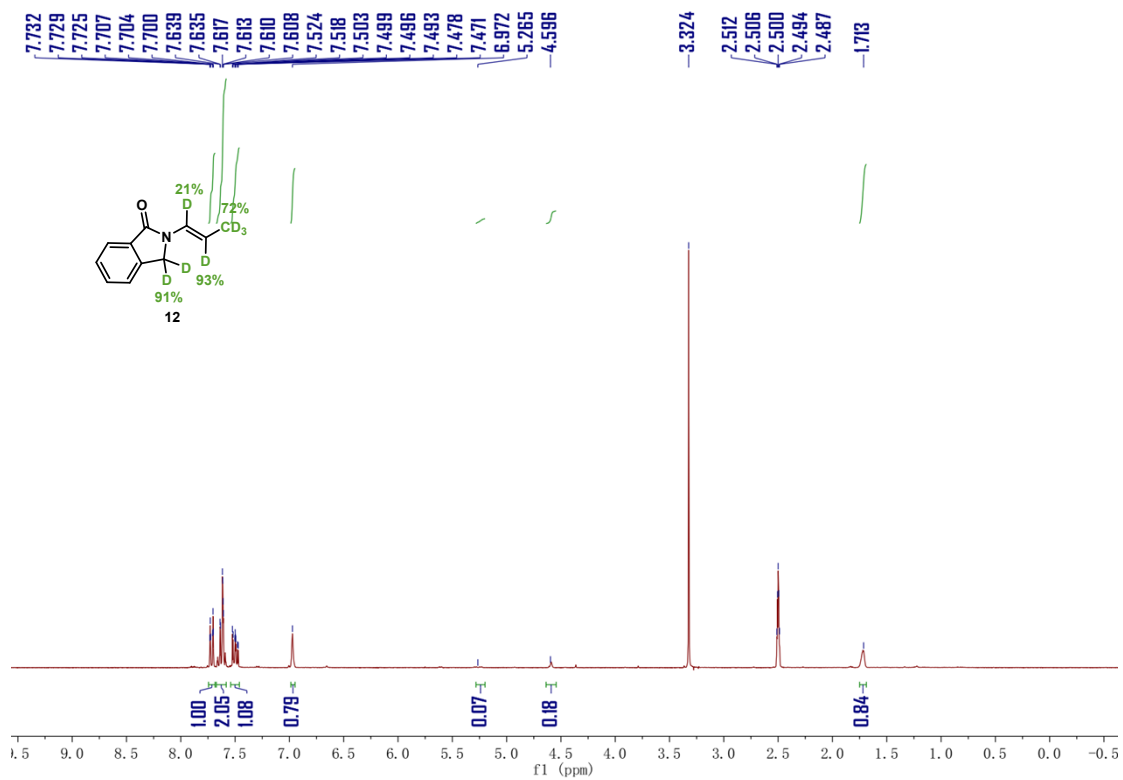

**<sup>13</sup>C NMR (101 MHz, CDCl<sub>3</sub>):**

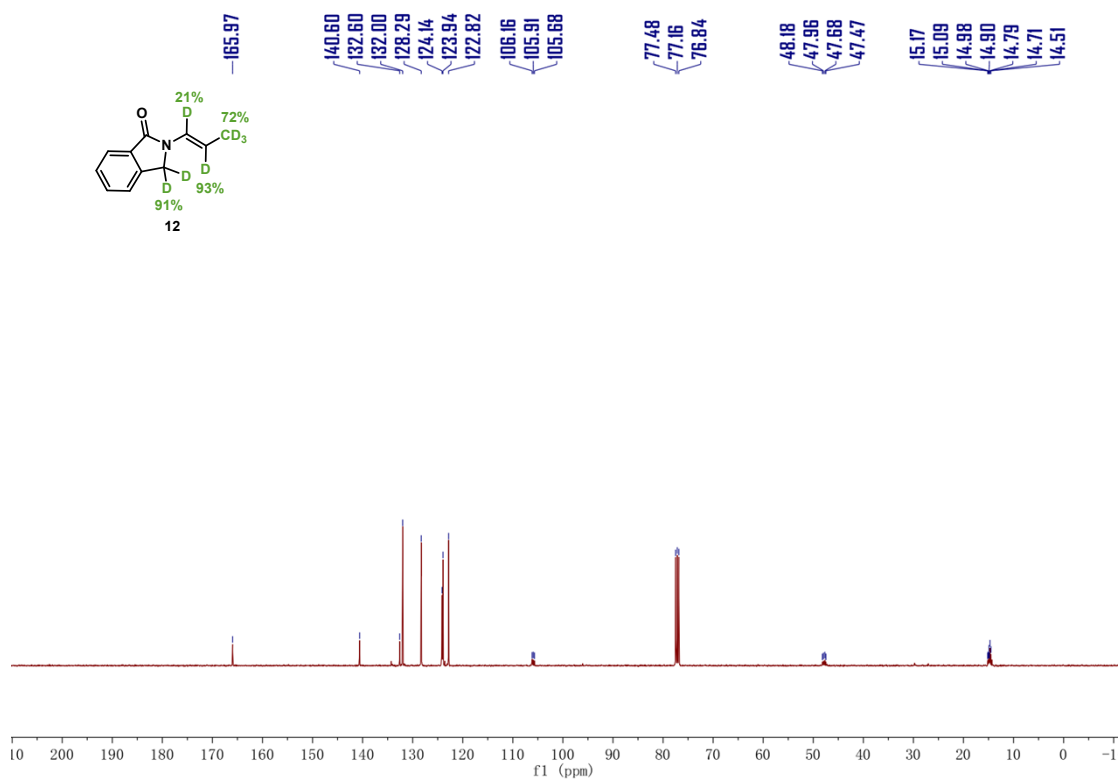

**<sup>1</sup>H NMR (400 MHz, CDCl<sub>3</sub>):**

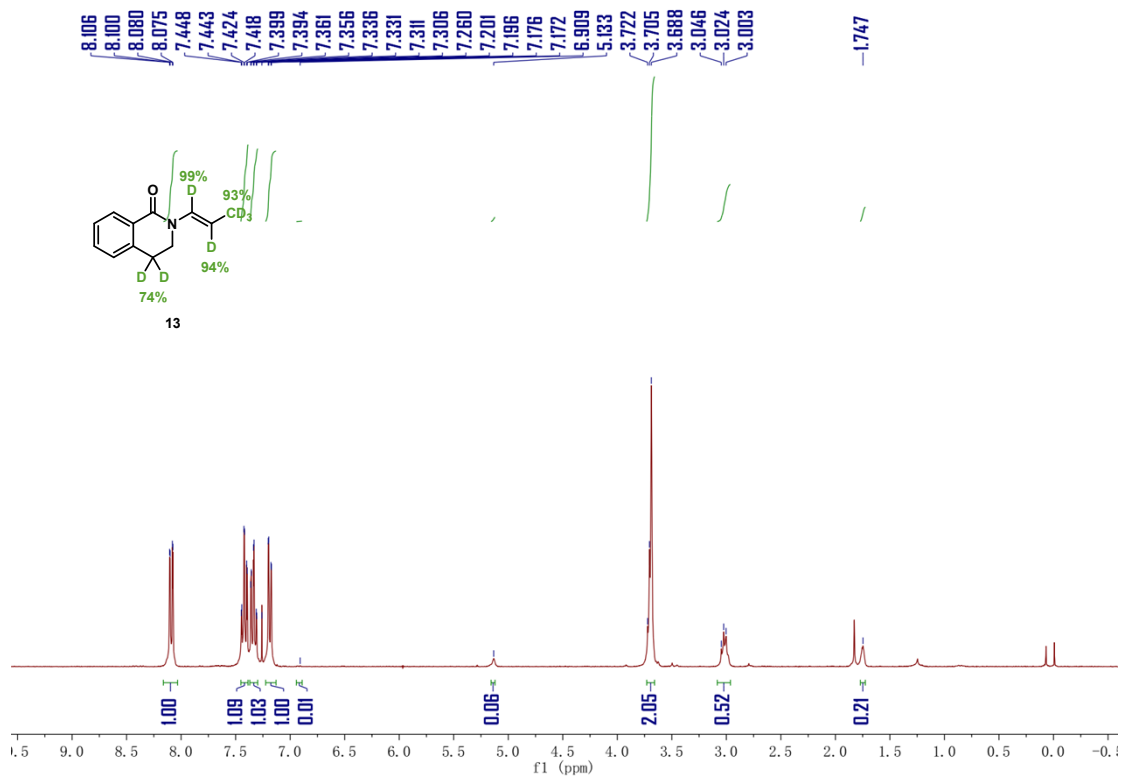

**<sup>13</sup>C NMR (101 MHz, CDCl<sub>3</sub>):**

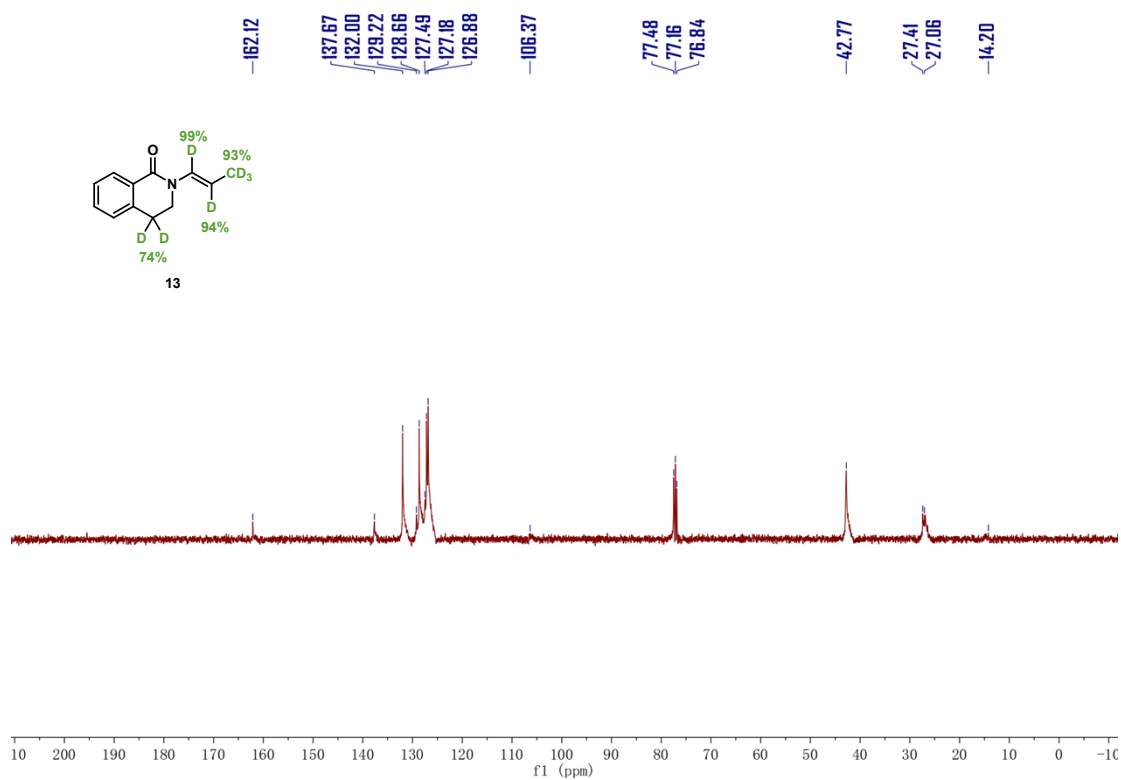

**<sup>1</sup>H NMR (400 MHz, CDCl<sub>3</sub>):**

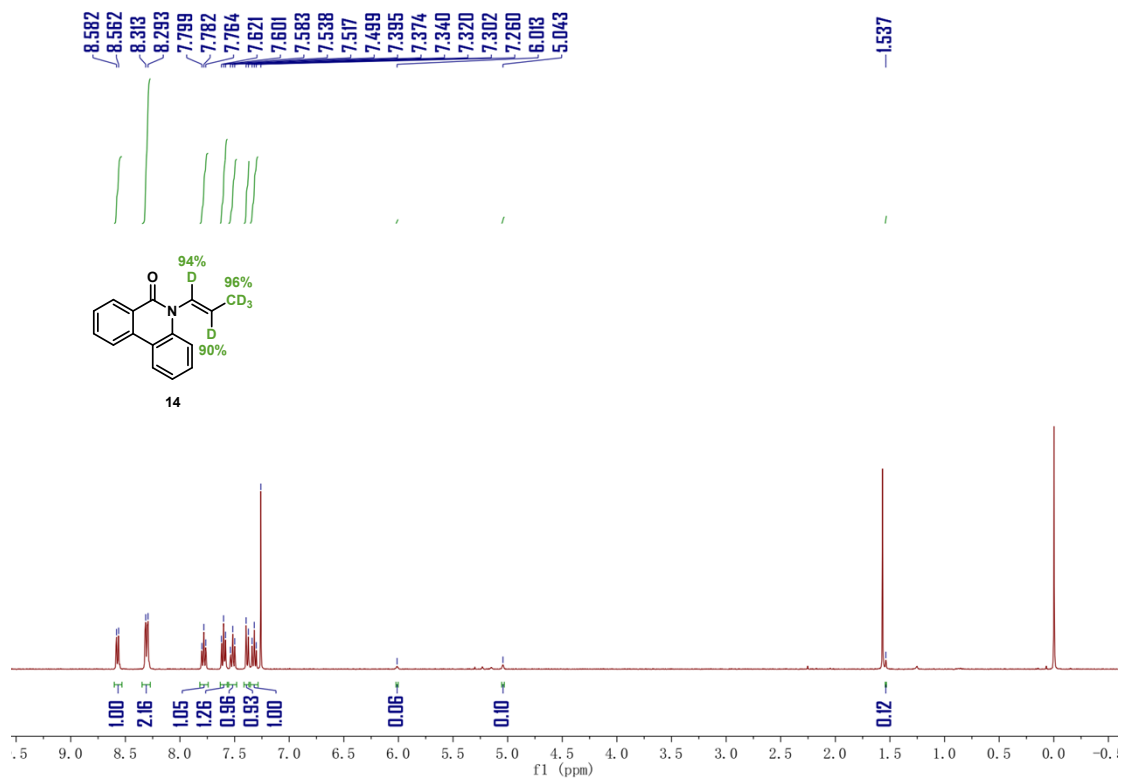

**$^{13}\text{C}$  NMR (101 MHz,  $\text{CDCl}_3$ ):**

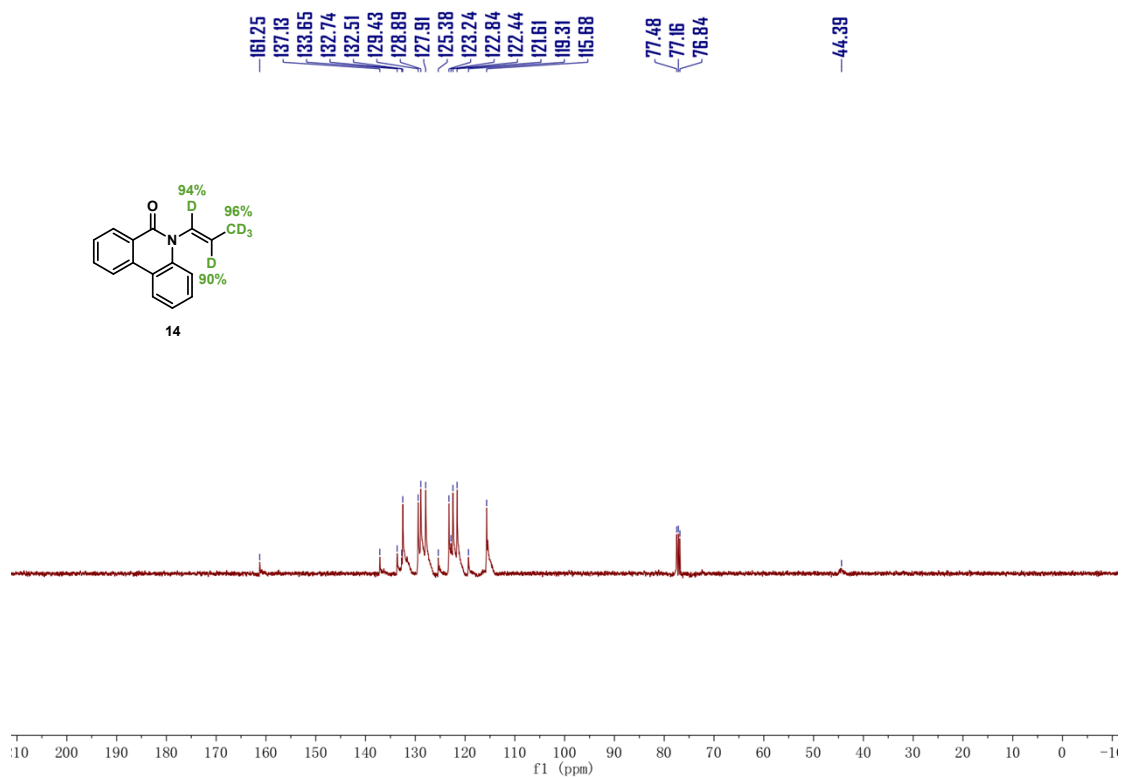

**$^1\text{H}$  NMR (400 MHz,  $\text{CDCl}_3$ ):**

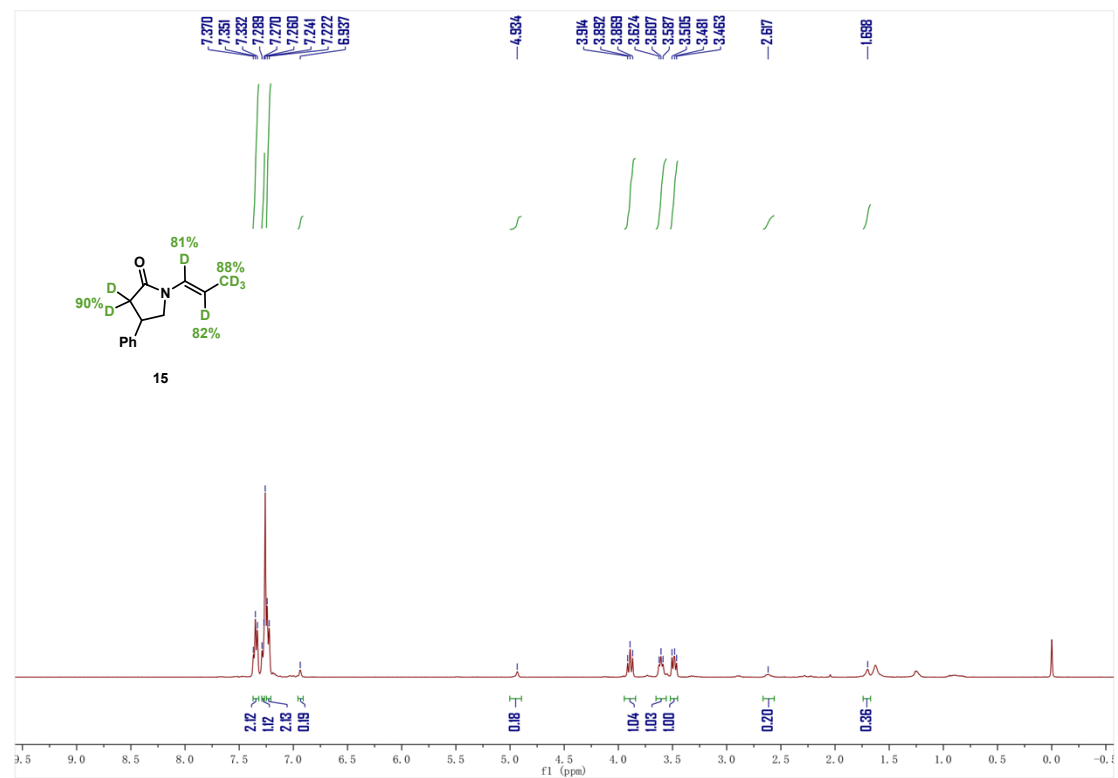

### $^{13}\text{C}$ NMR (101 MHz, $\text{CDCl}_3$ ):

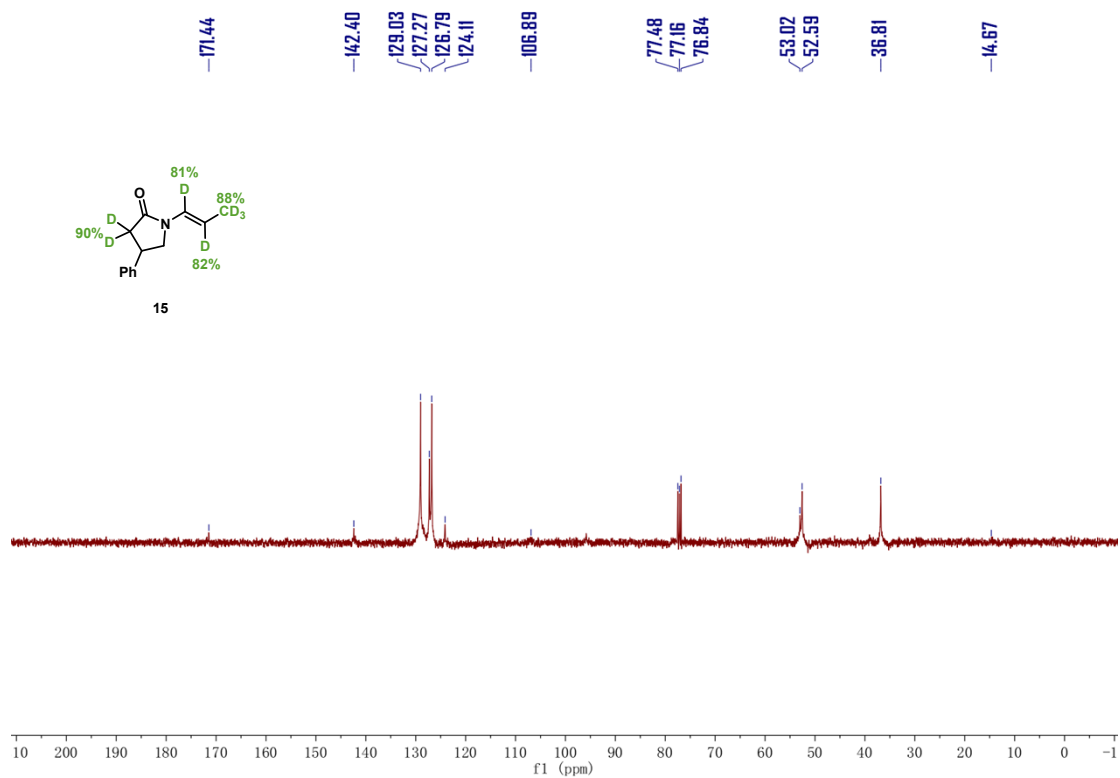

### $^1\text{H}$ NMR (400 MHz, $\text{CDCl}_3$ ):

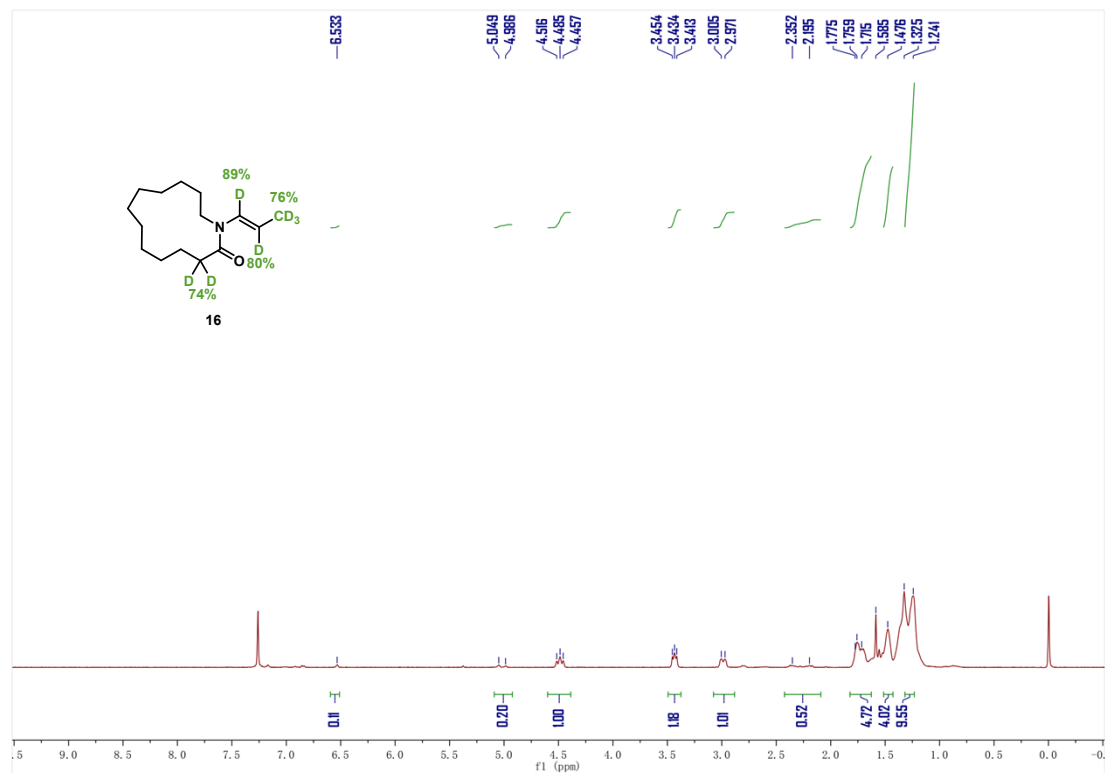

**<sup>13</sup>C NMR (101 MHz, CDCl<sub>3</sub>):**

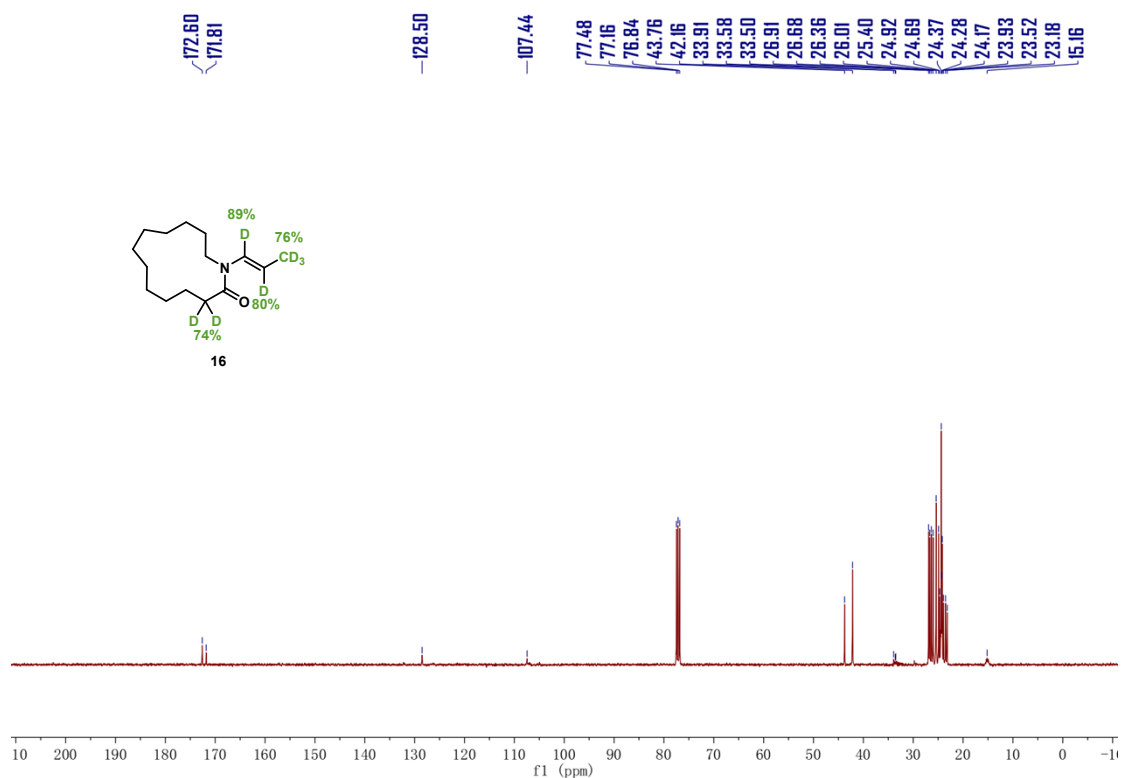

**<sup>1</sup>H NMR (400 MHz, CDCl<sub>3</sub>):**

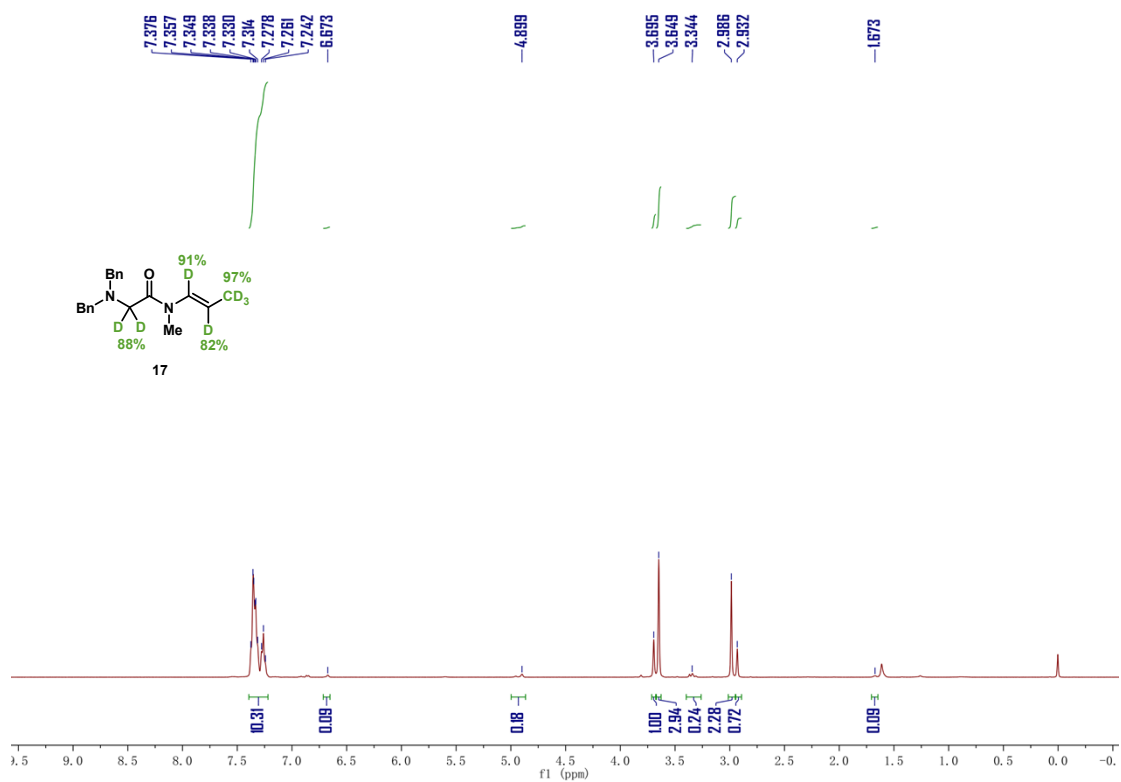

**<sup>13</sup>C NMR (101 MHz, CDCl<sub>3</sub>):**

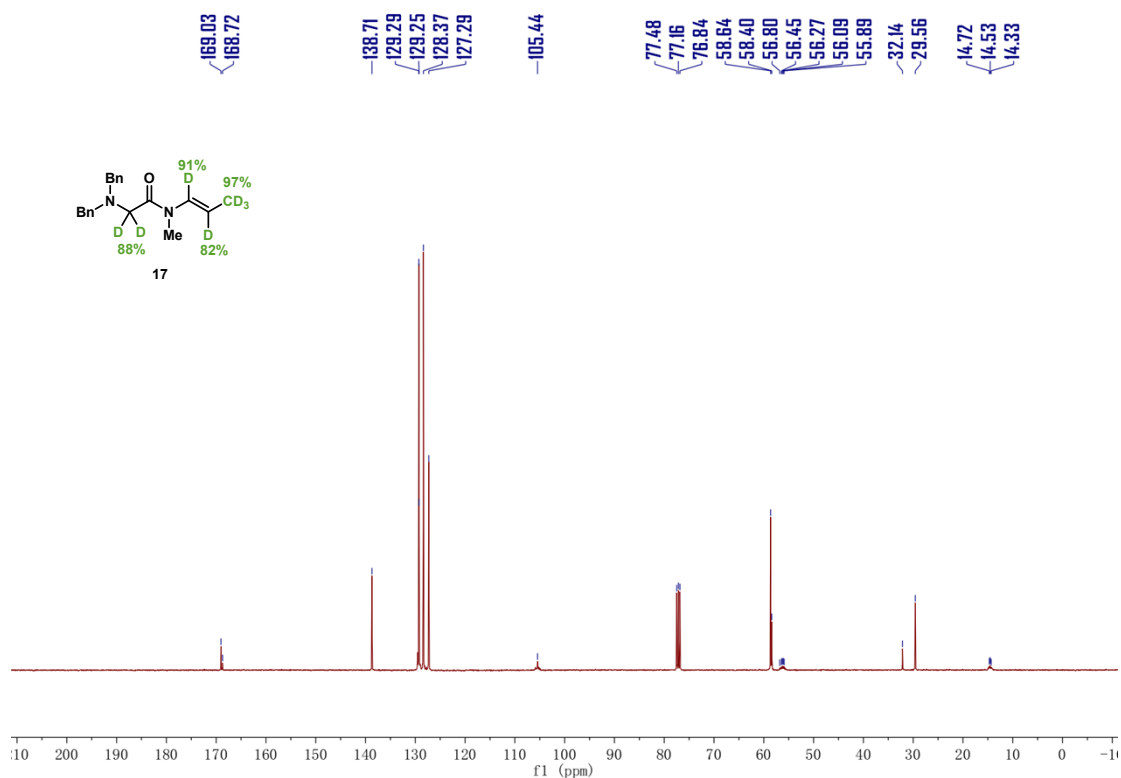

**<sup>1</sup>H NMR (400 MHz, CDCl<sub>3</sub>):**

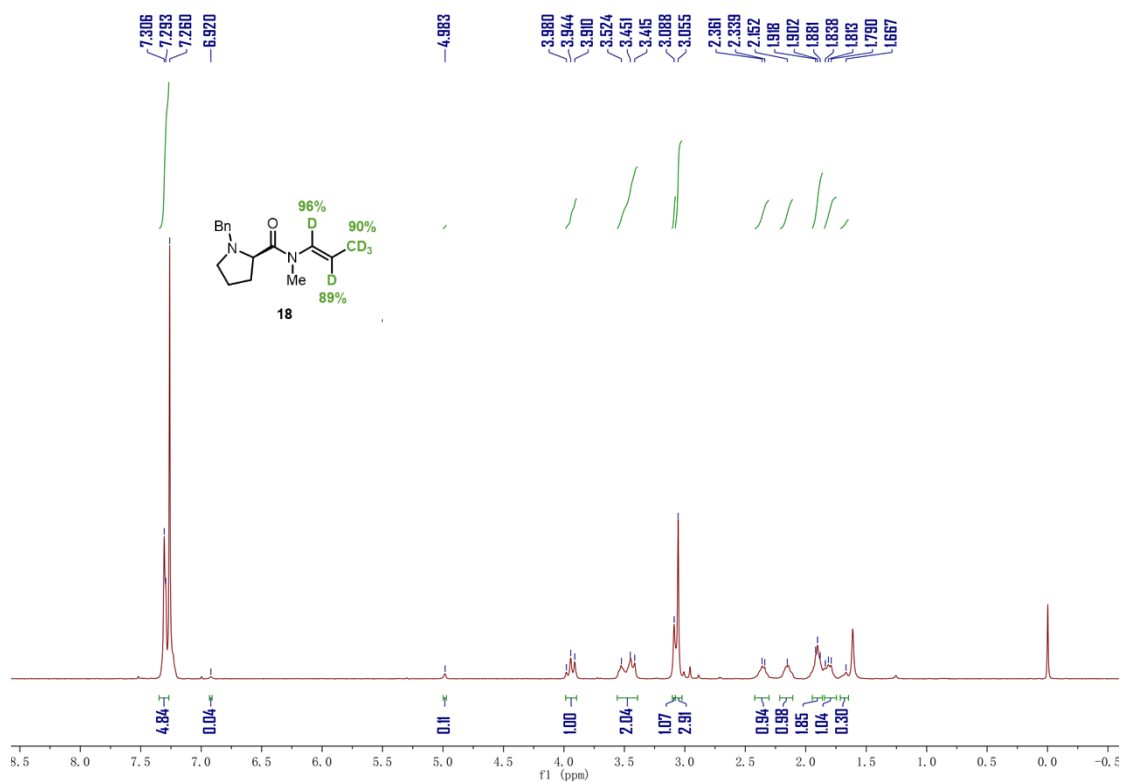

**$^{13}\text{C}$  NMR (101 MHz,  $\text{CDCl}_3$ ):**

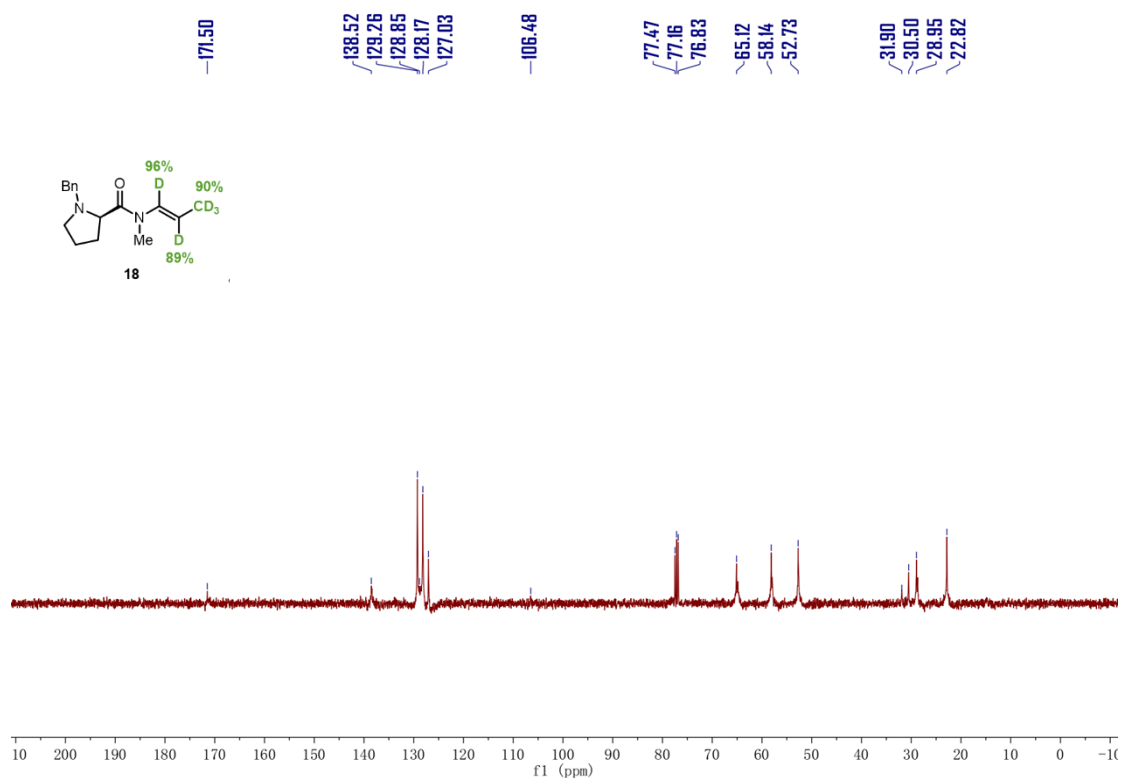

**$^1\text{H}$  NMR (400 MHz,  $\text{CDCl}_3$ ):**

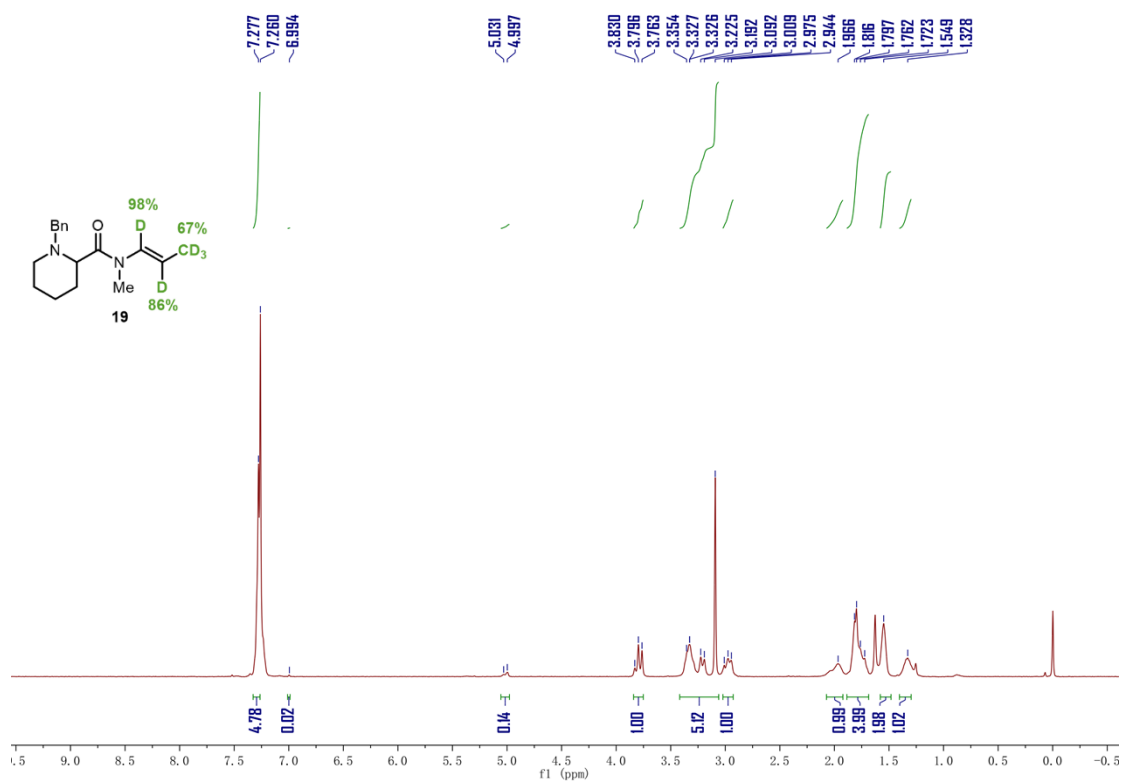



### $^{13}\text{C}$ NMR (101 MHz, $\text{CDCl}_3$ ):

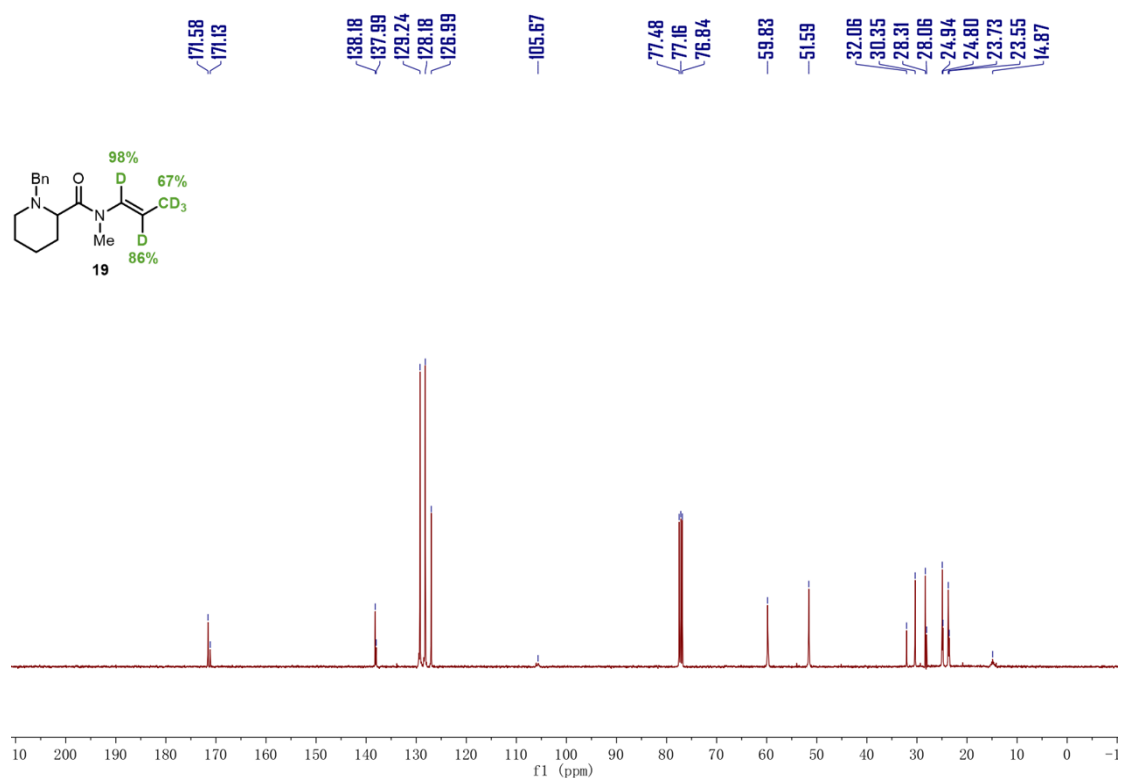

### $^1\text{H}$ NMR (400 MHz, $\text{CDCl}_3$ ):

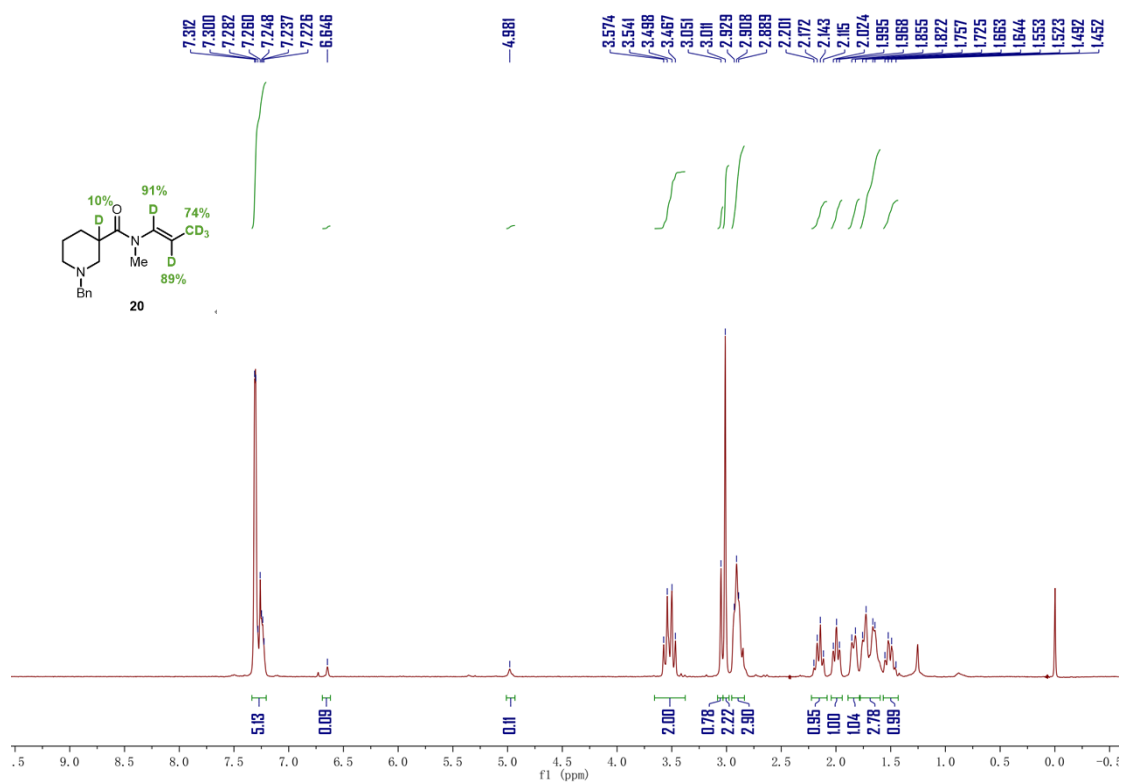

**$^{13}\text{C}$  NMR (101 MHz,  $\text{CDCl}_3$ ):**

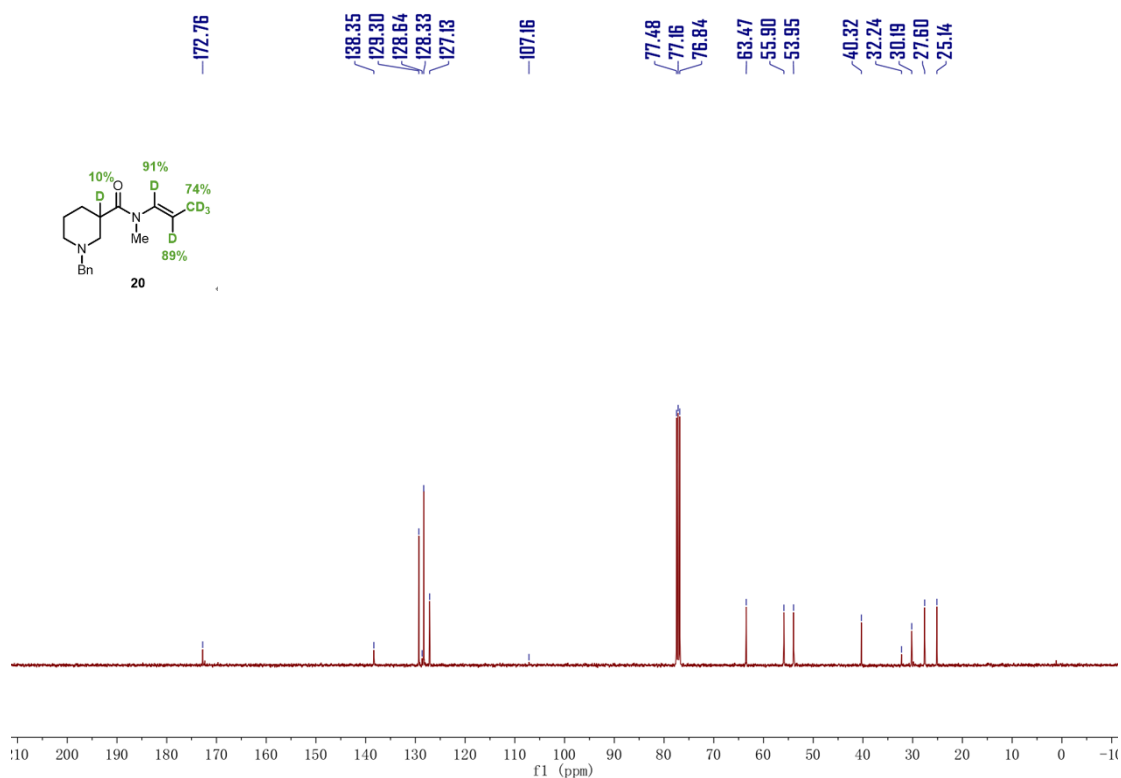

**$^1\text{H}$  NMR (400 MHz,  $\text{CDCl}_3$ ):**

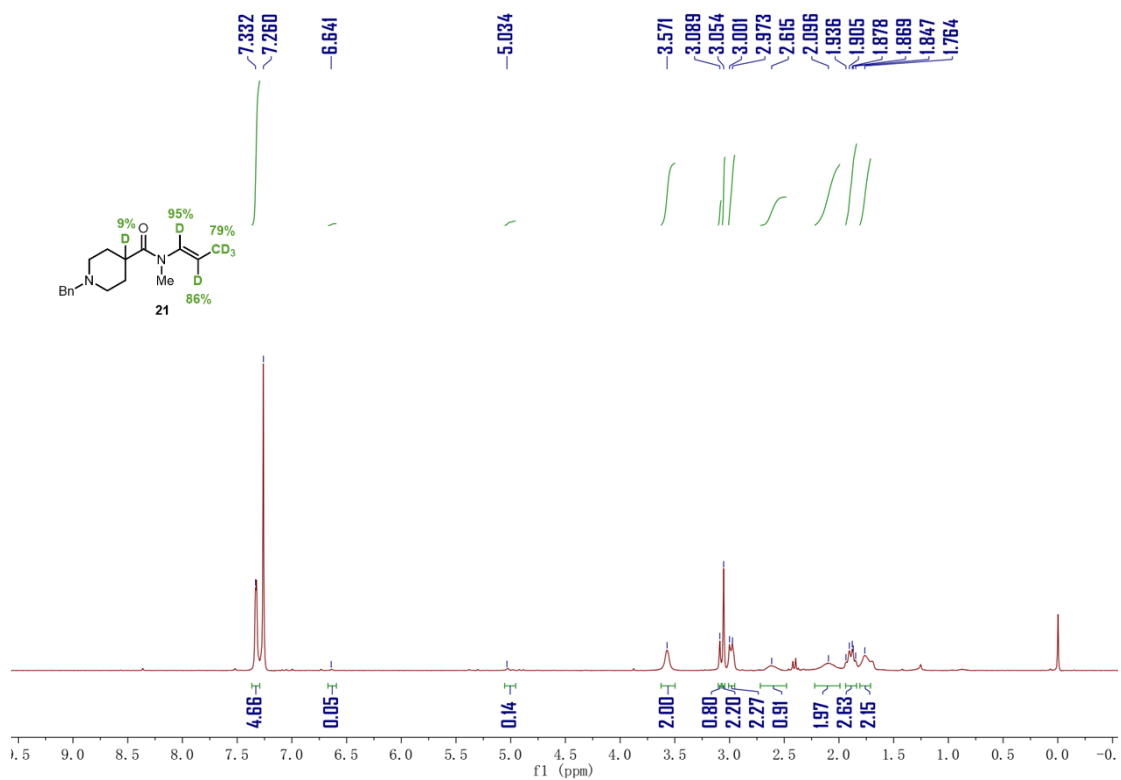

### $^{13}\text{C}$ NMR (101 MHz, $\text{CDCl}_3$ ):

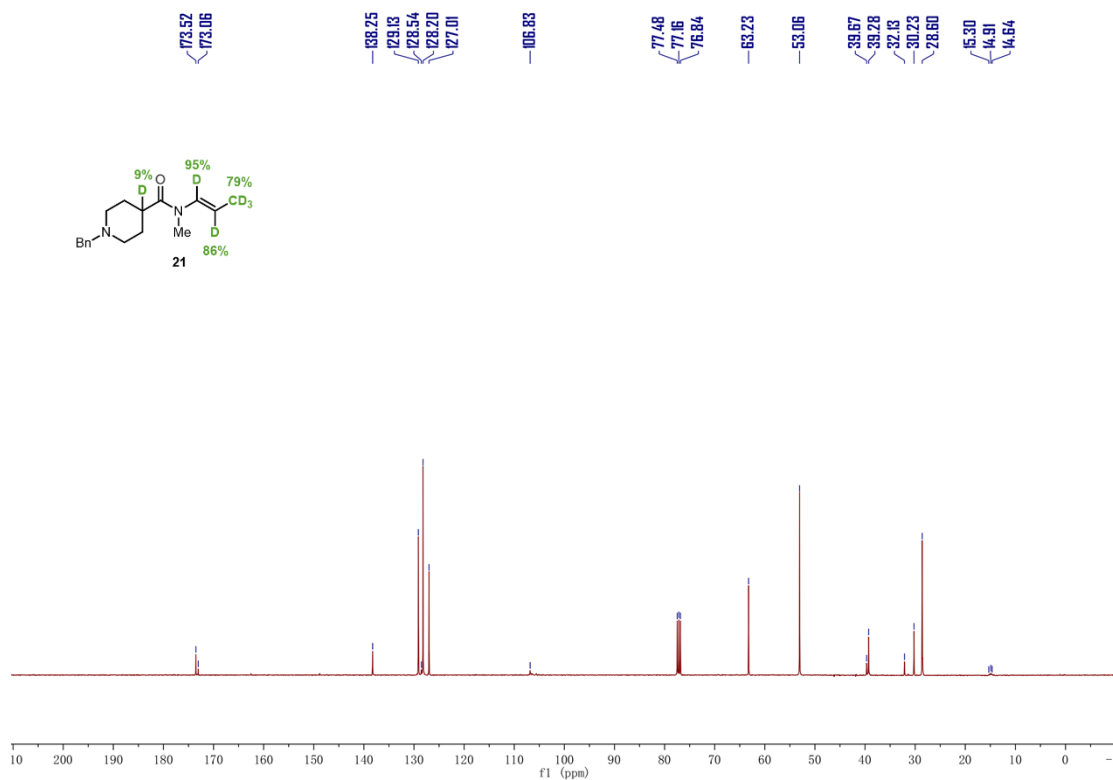

### $^1\text{H}$ NMR (400 MHz, $\text{CDCl}_3$ ):

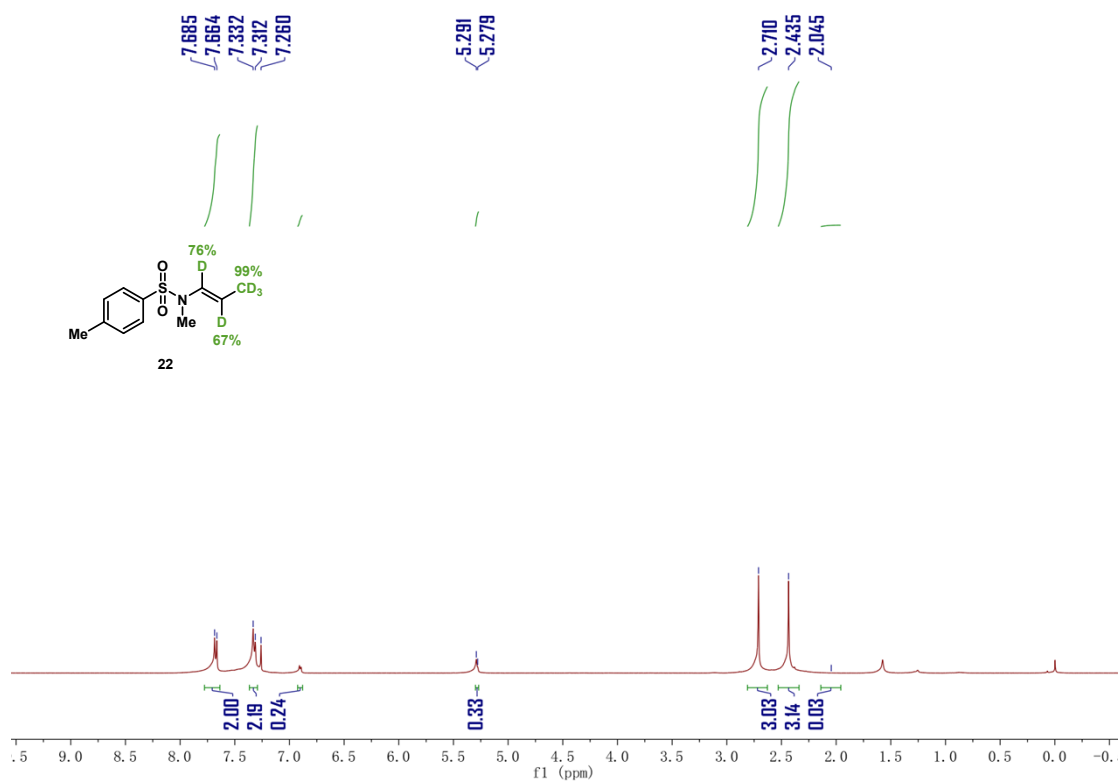

**$^{13}\text{C}$  NMR (101 MHz,  $\text{CDCl}_3$ ):**

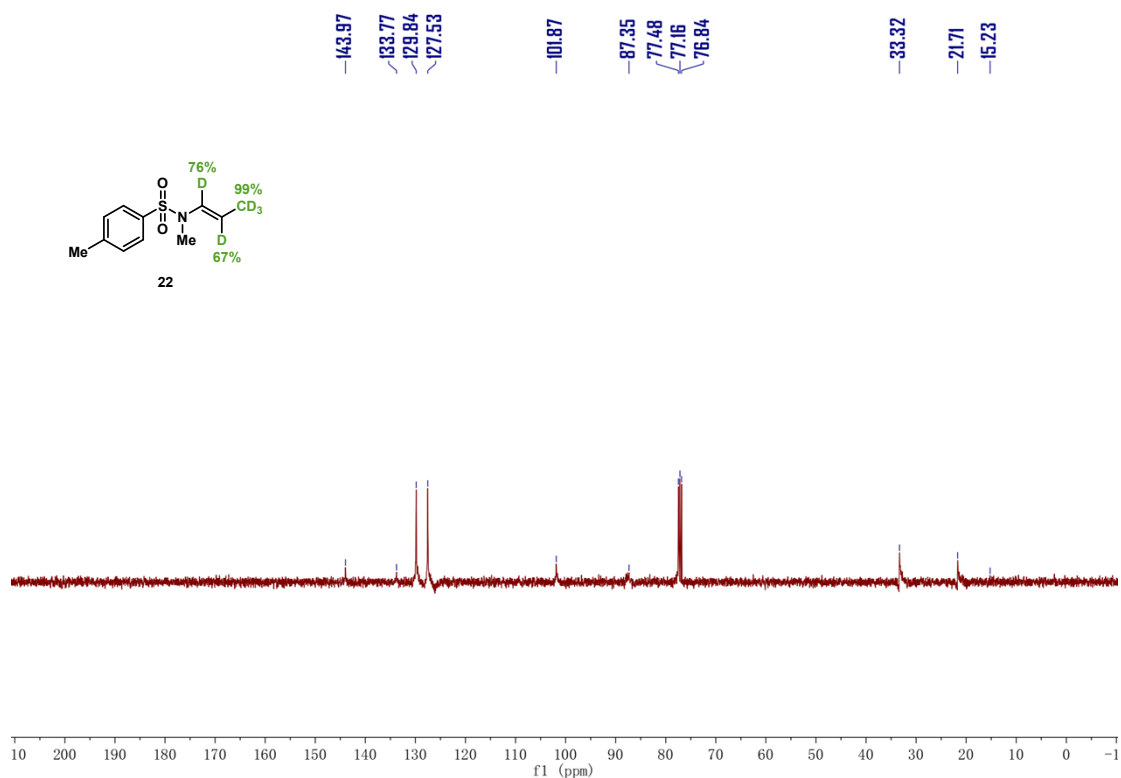

**$^1\text{H}$  NMR (400 MHz,  $\text{CDCl}_3$ ):**

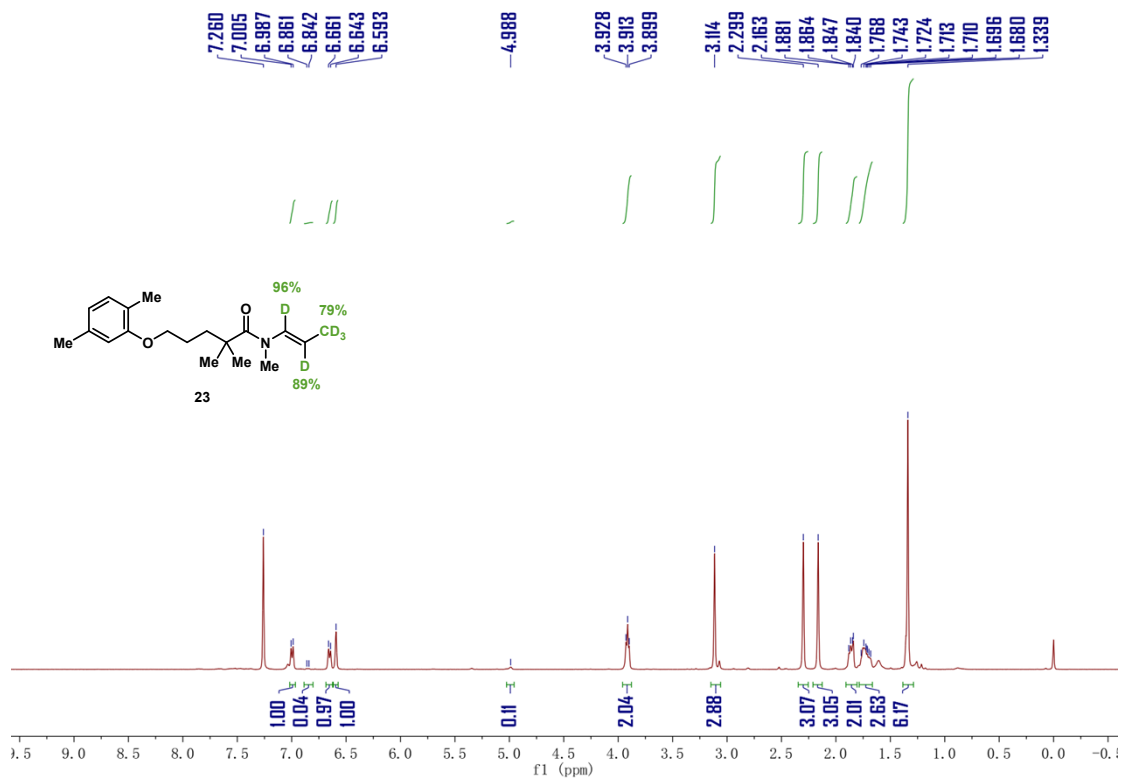

**<sup>13</sup>C NMR (101 MHz, CDCl<sub>3</sub>):**

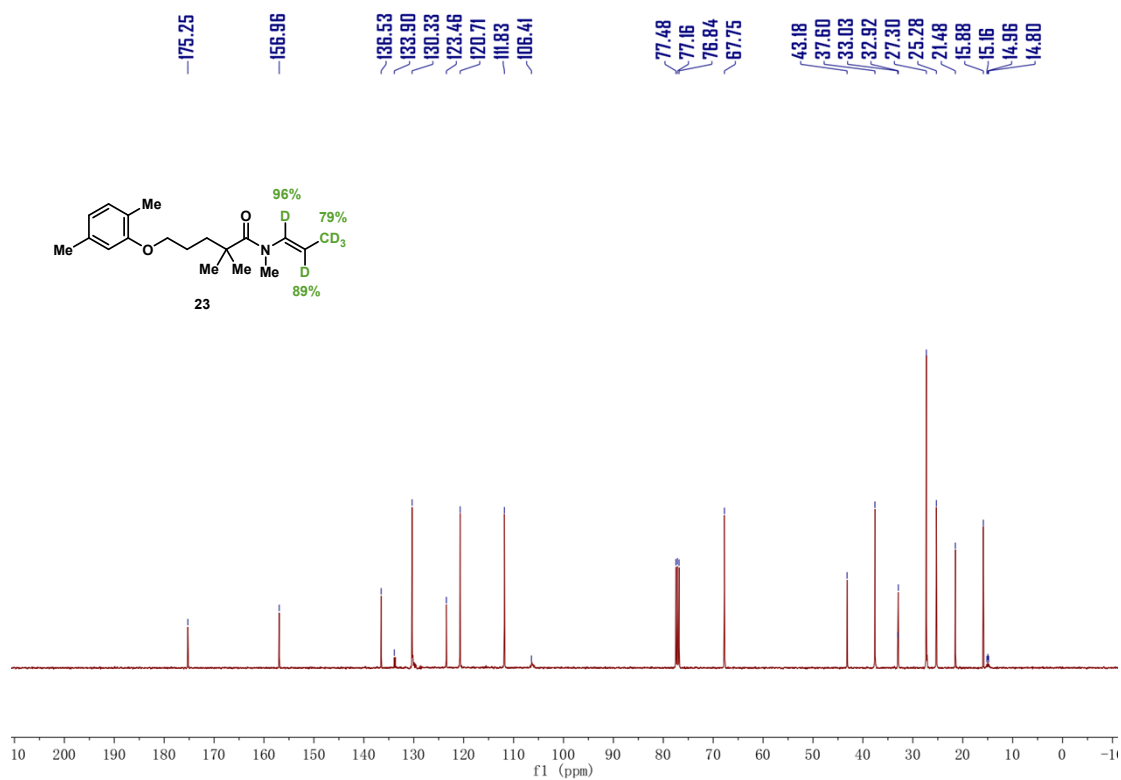

**<sup>1</sup>H NMR (400 MHz, CDCl<sub>3</sub>):**

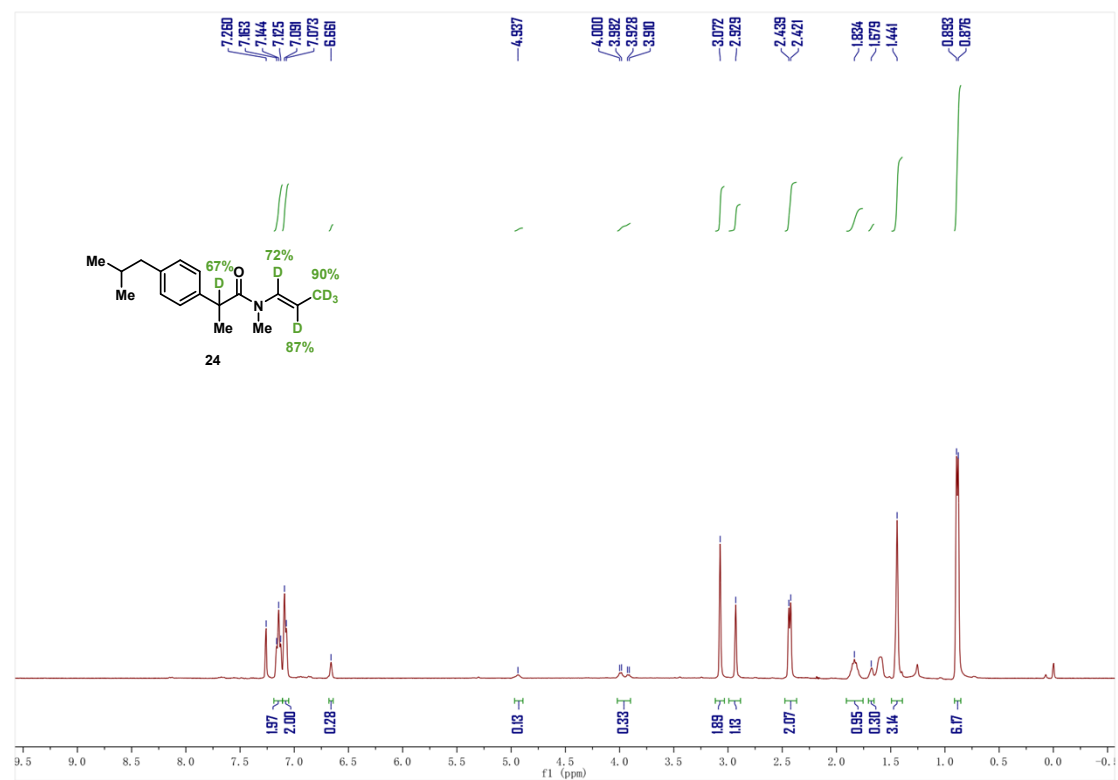

**$^{13}\text{C}$  NMR (101 MHz,  $\text{CDCl}_3$ ):**

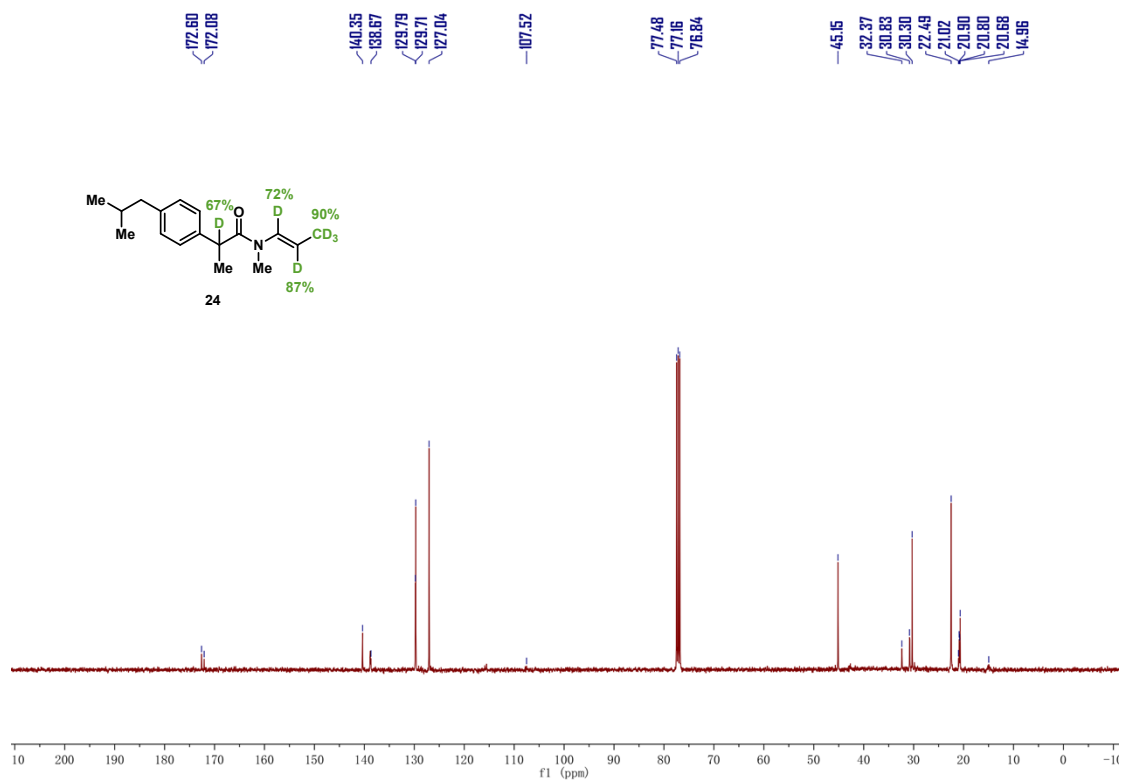

**$^1\text{H}$  NMR (400 MHz,  $\text{CDCl}_3$ ):**

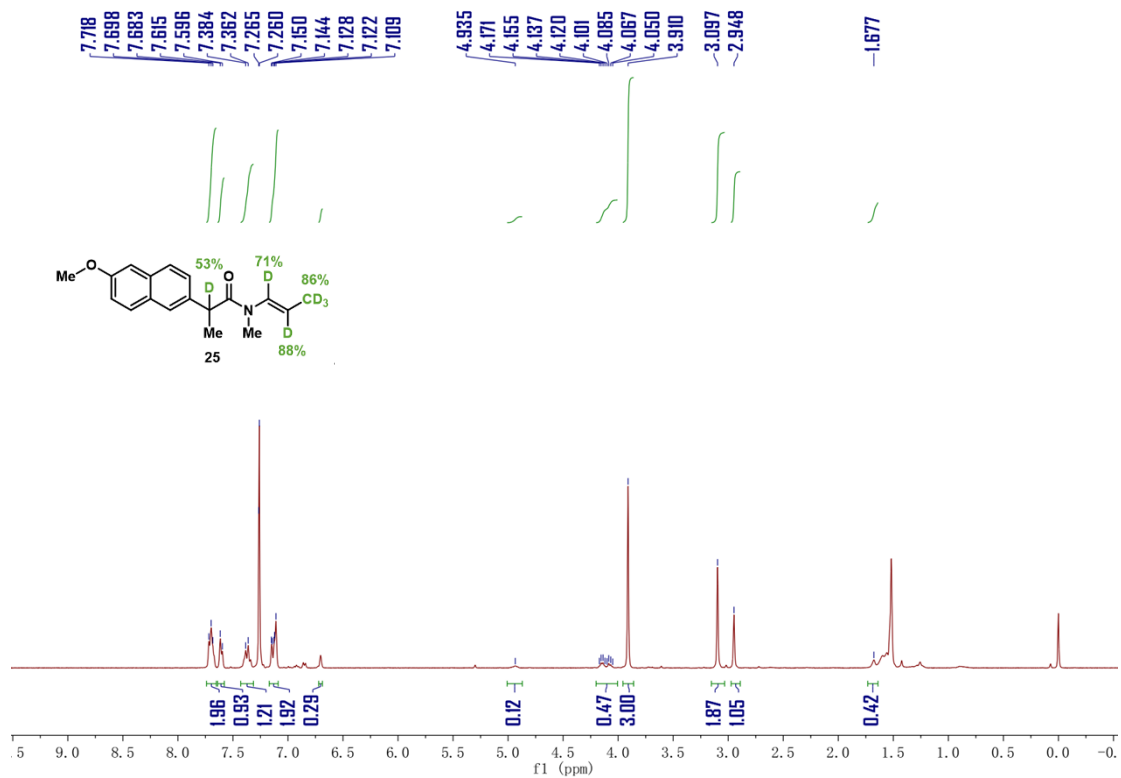

### $^{13}\text{C}$ NMR (101 MHz, $\text{CDCl}_3$ ):

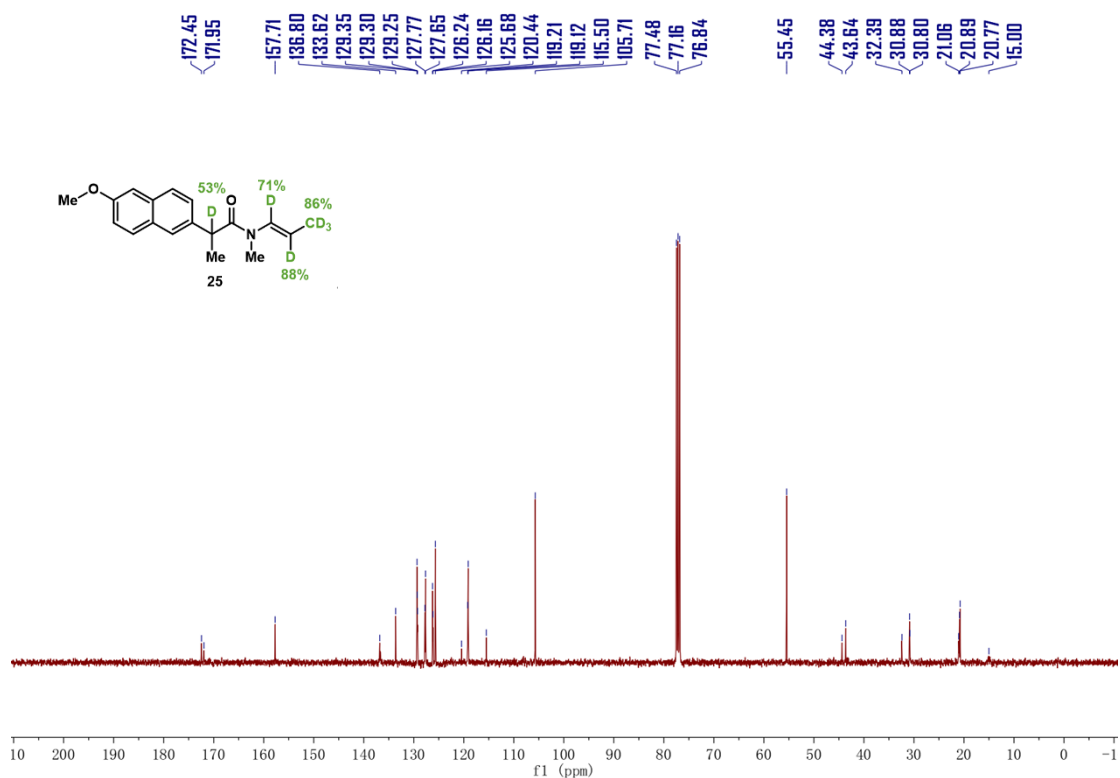

### $^1\text{H}$ NMR (400 MHz, $\text{CDCl}_3$ ):

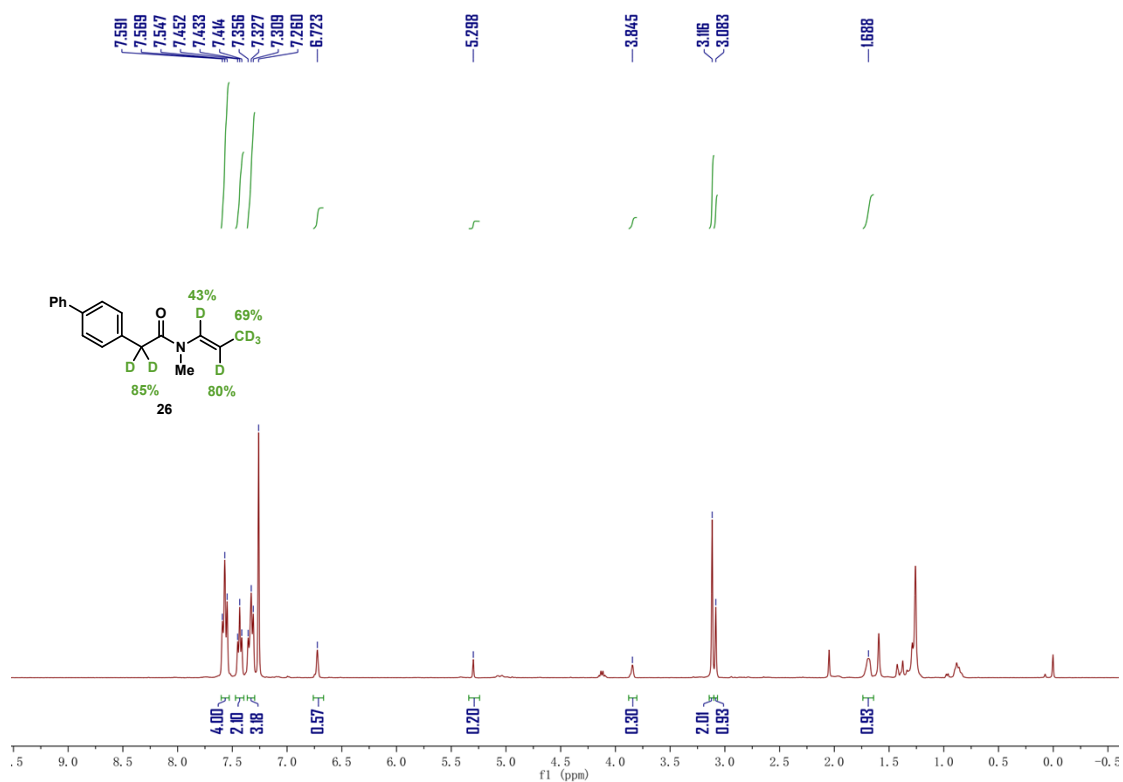

### $^{13}\text{C}$ NMR (101 MHz, $\text{CDCl}_3$ ):

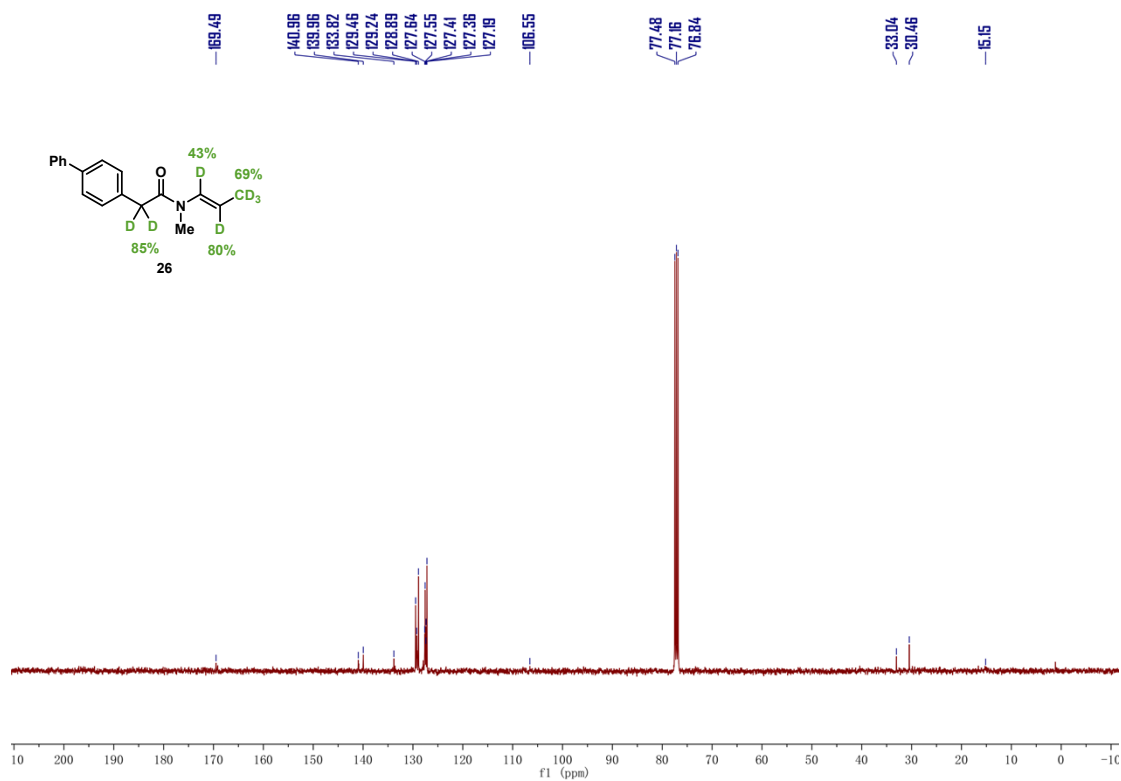

### $^1\text{H}$ NMR (400 MHz, $\text{CDCl}_3$ ):

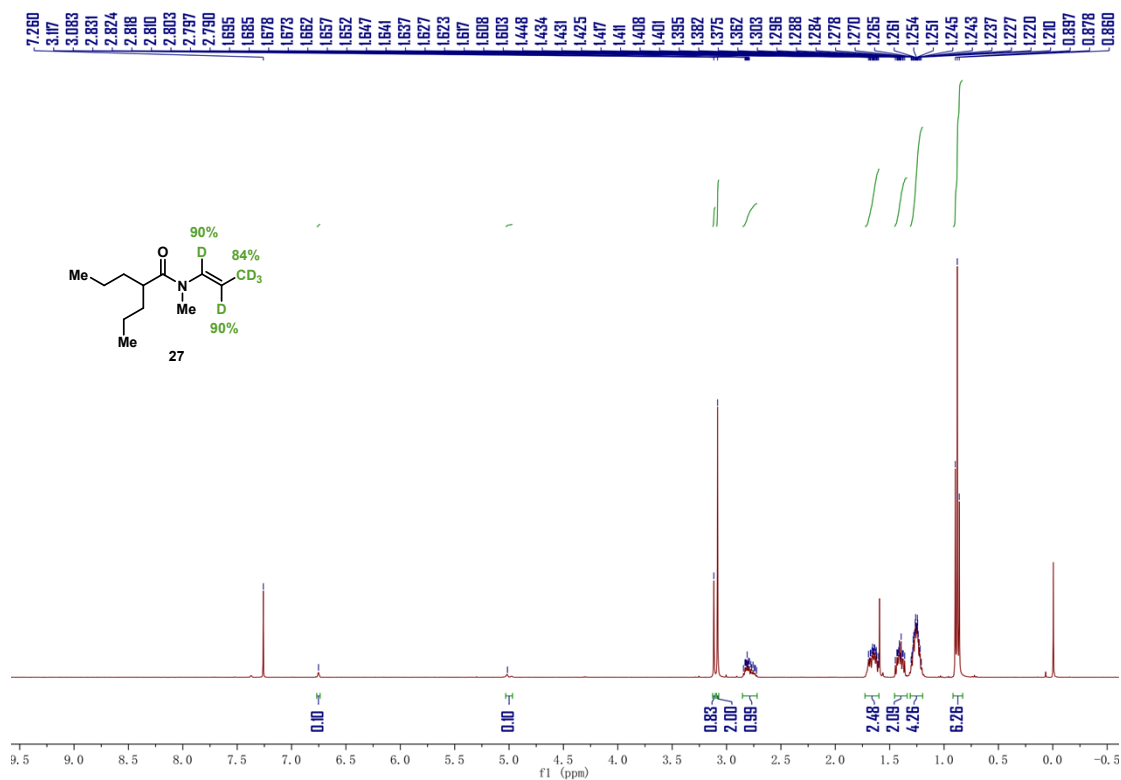



**<sup>13</sup>C NMR (101 MHz, CDCl<sub>3</sub>):**

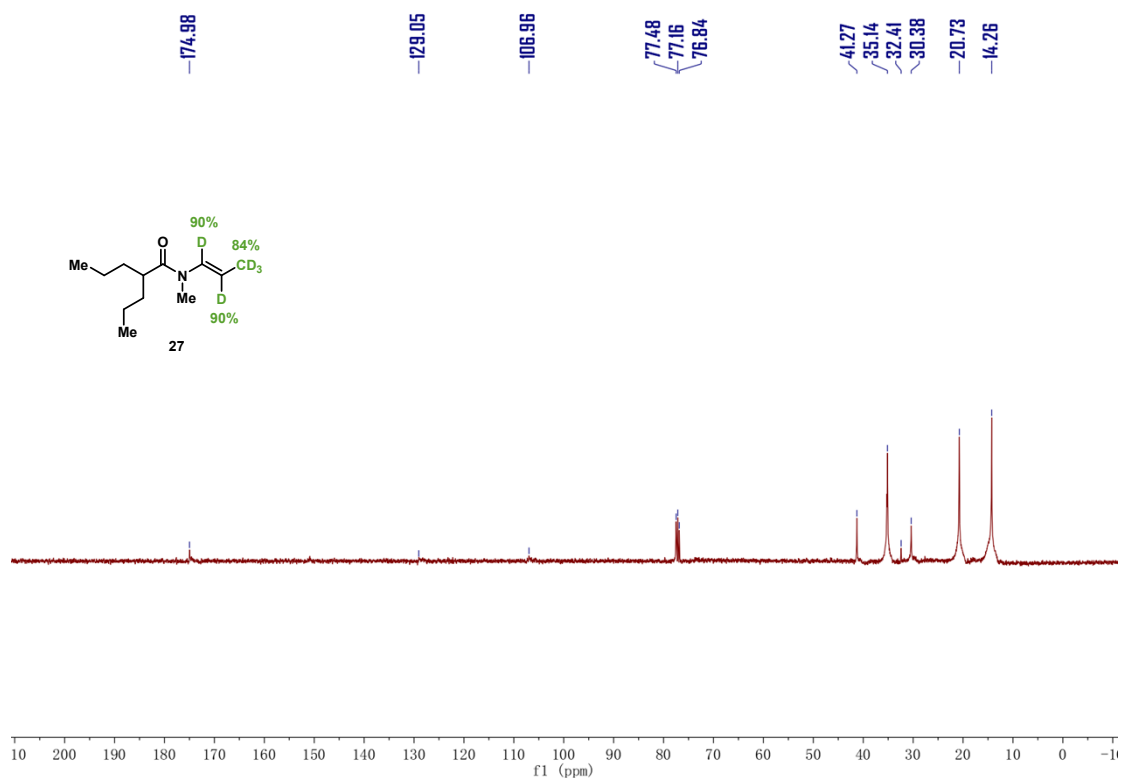

**<sup>1</sup>H NMR (400 MHz, CDCl<sub>3</sub>):**

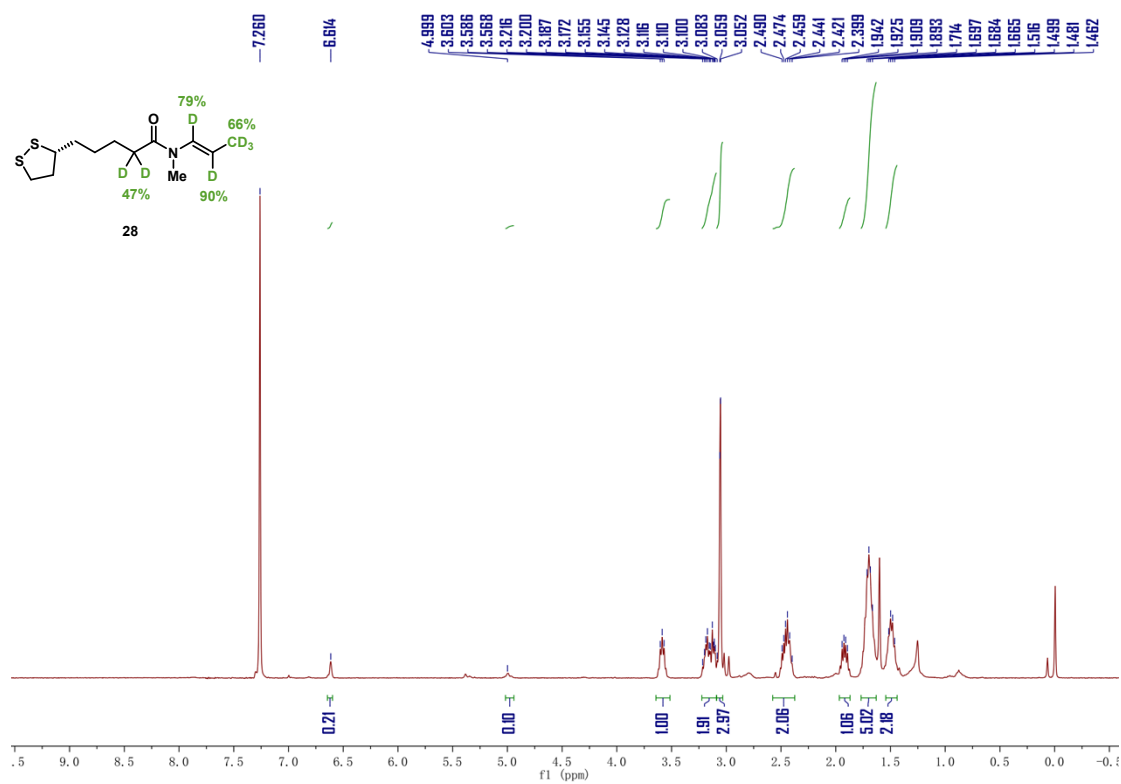

**$^{13}\text{C}$  NMR (101 MHz,  $\text{CDCl}_3$ ):**

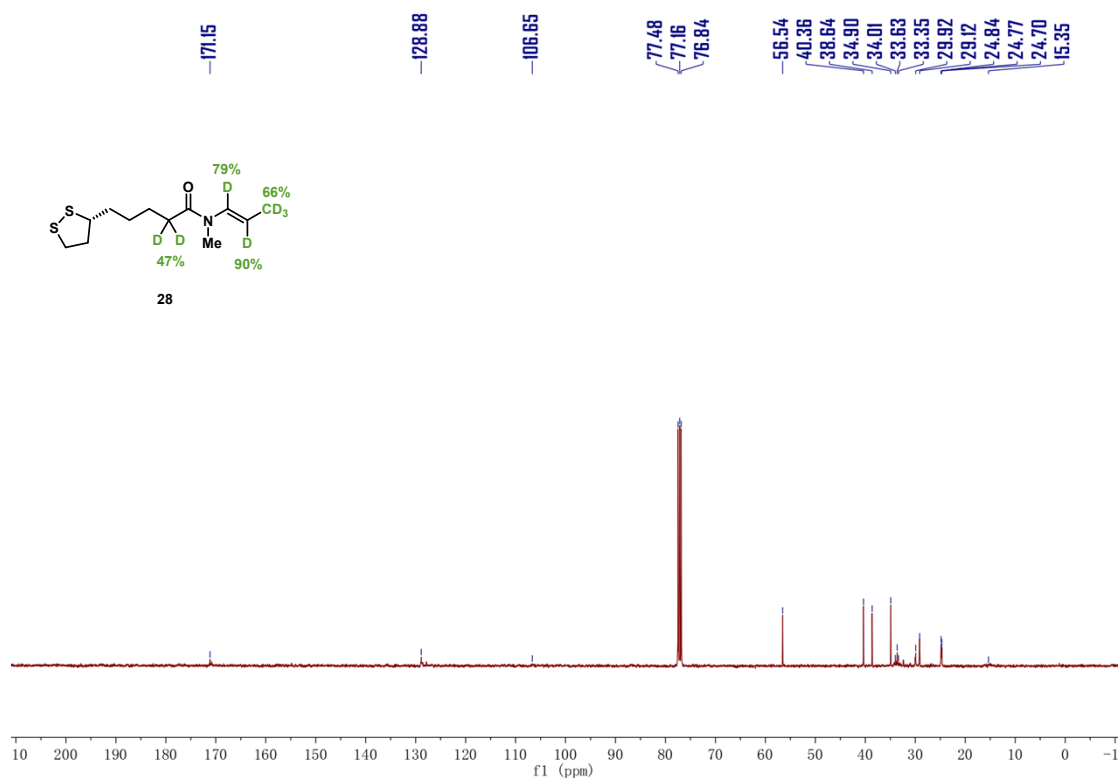

**$^1\text{H}$  NMR (400 MHz,  $\text{CDCl}_3$ ):**

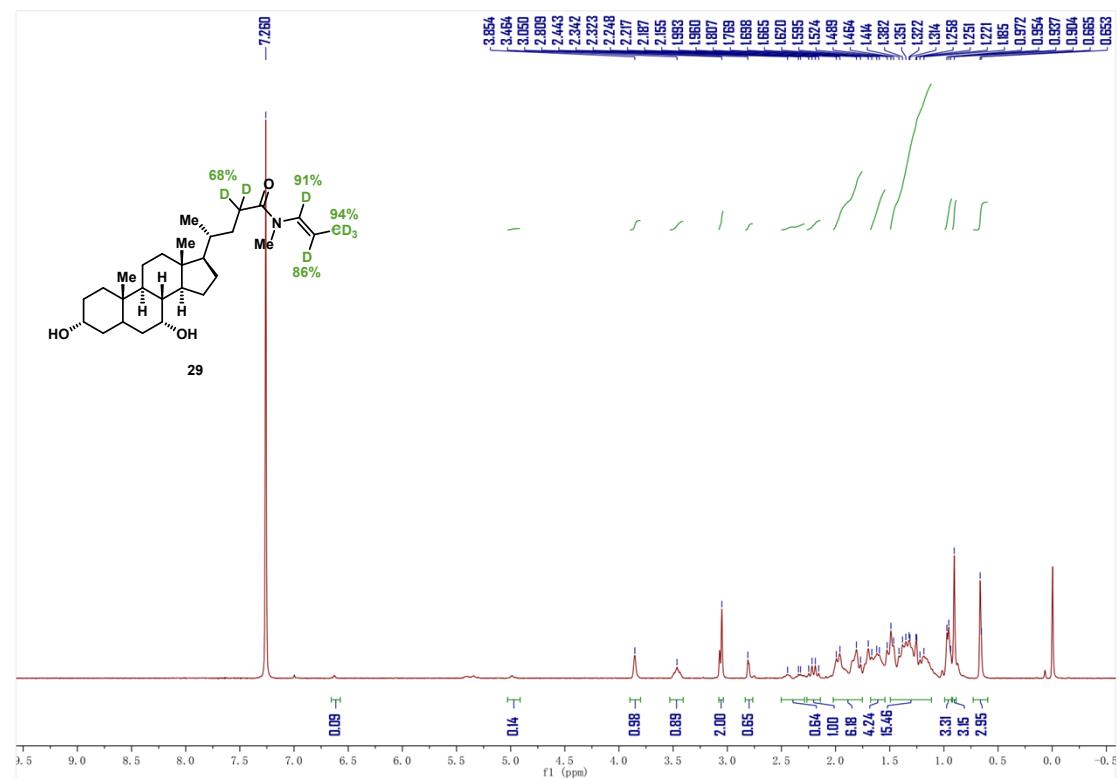

**<sup>13</sup>C NMR (101 MHz, CDCl<sub>3</sub>):**

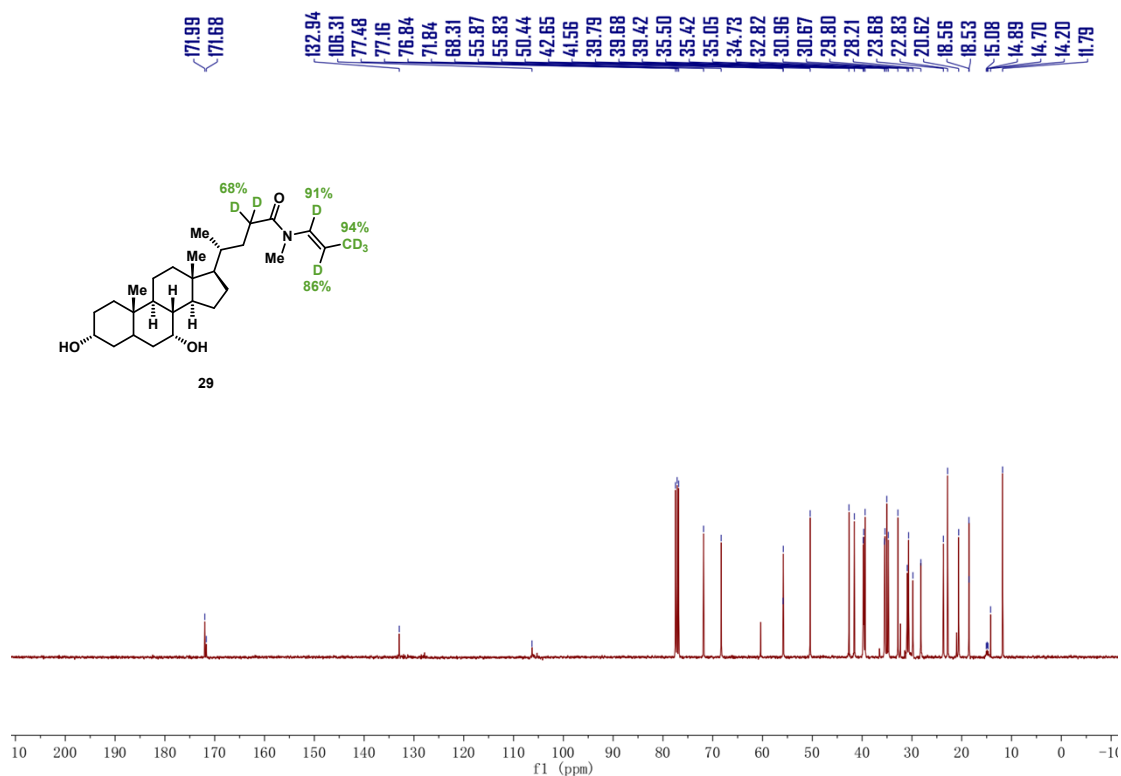

**<sup>1</sup>H NMR (400 MHz, CDCl<sub>3</sub>):**

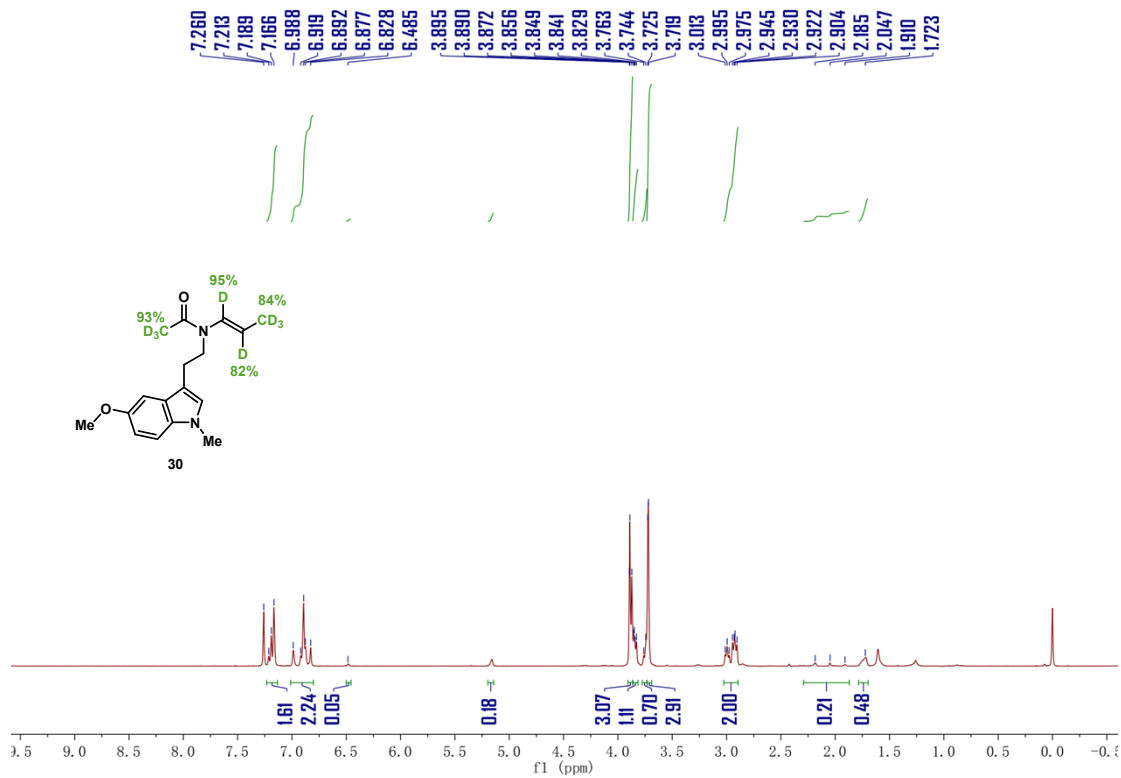

**$^{13}\text{C}$  NMR (101 MHz,  $\text{CDCl}_3$ ):**

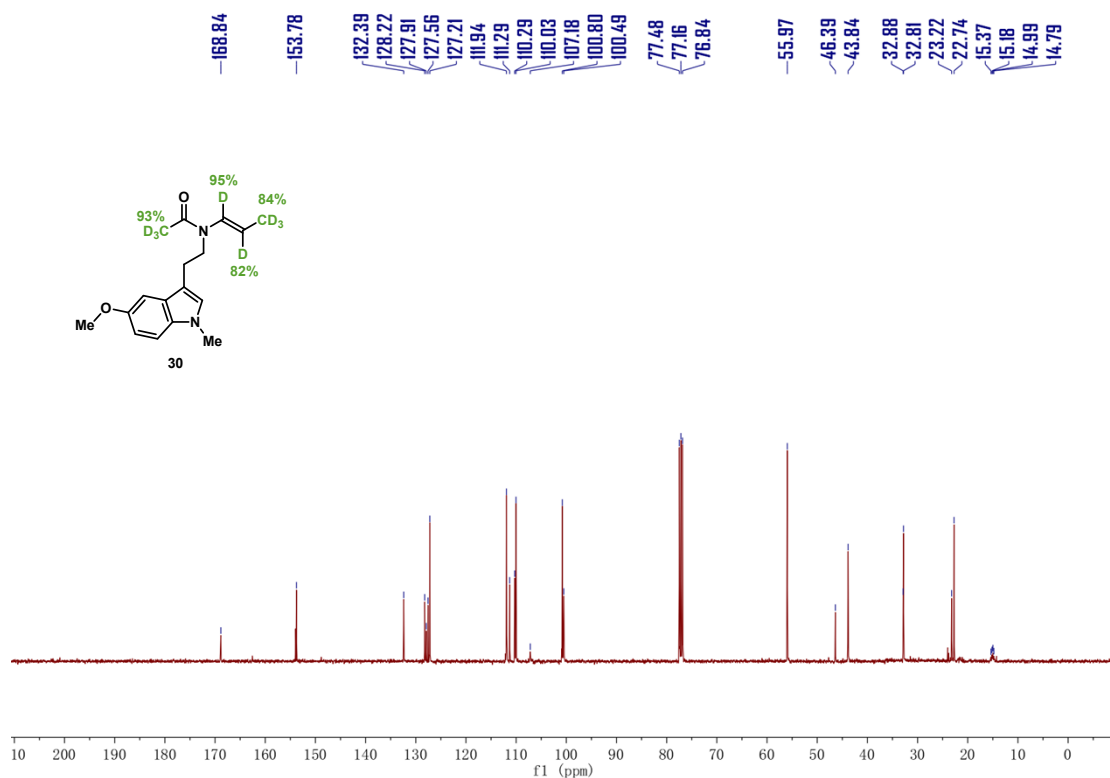

**$^1\text{H}$  NMR (400 MHz,  $\text{CDCl}_3$ ):**

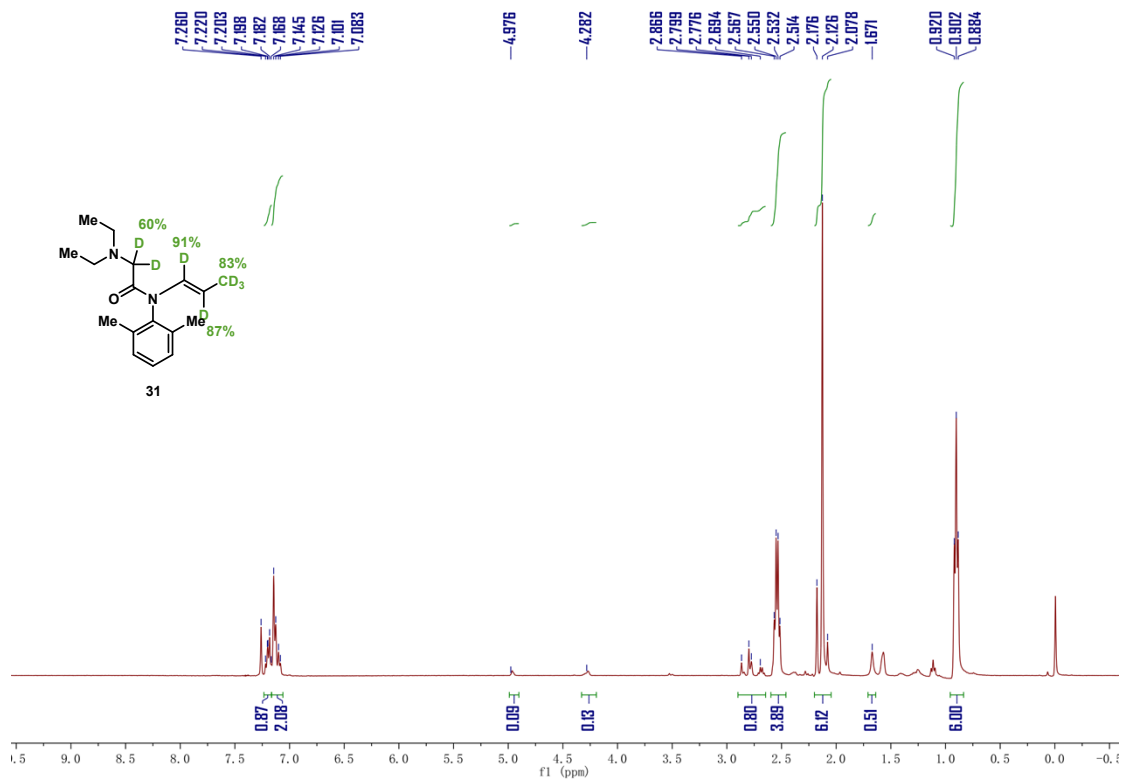

### $^{13}\text{C}$ NMR (101 MHz, $\text{CDCl}_3$ ):

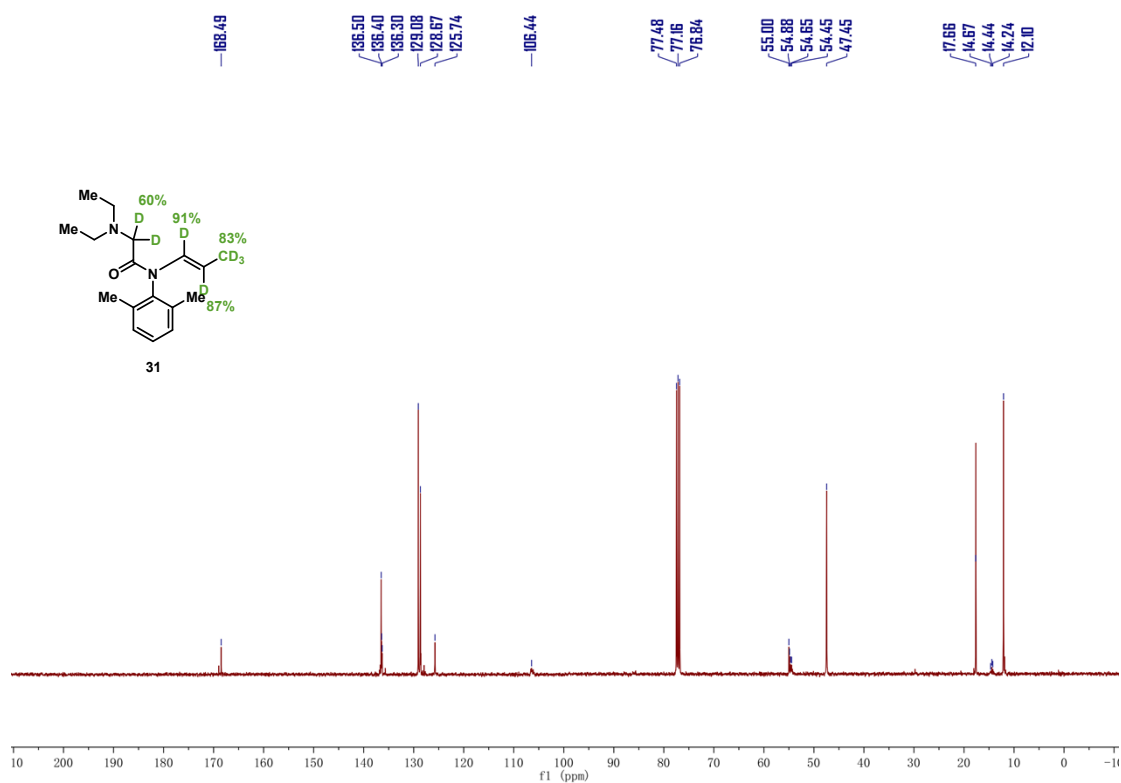

### $^1\text{H}$ NMR (400 MHz, $\text{CDCl}_3$ ):

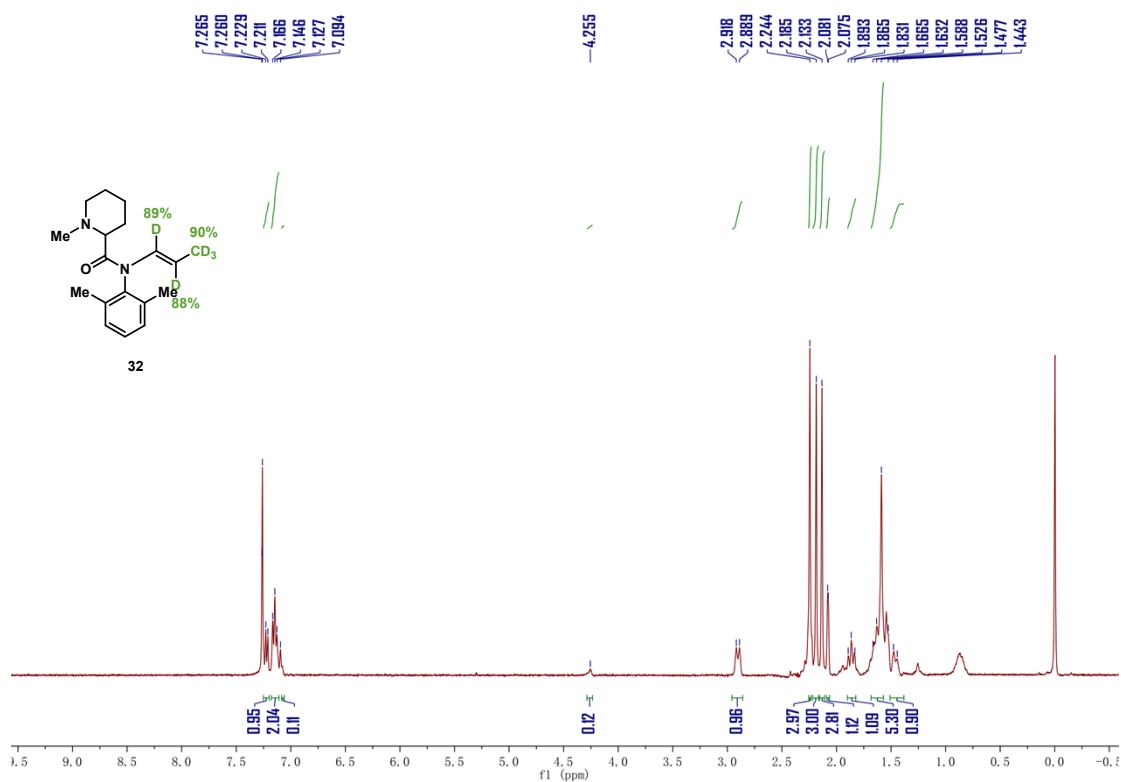

**$^{13}\text{C}$  NMR (101 MHz,  $\text{CDCl}_3$ ):**

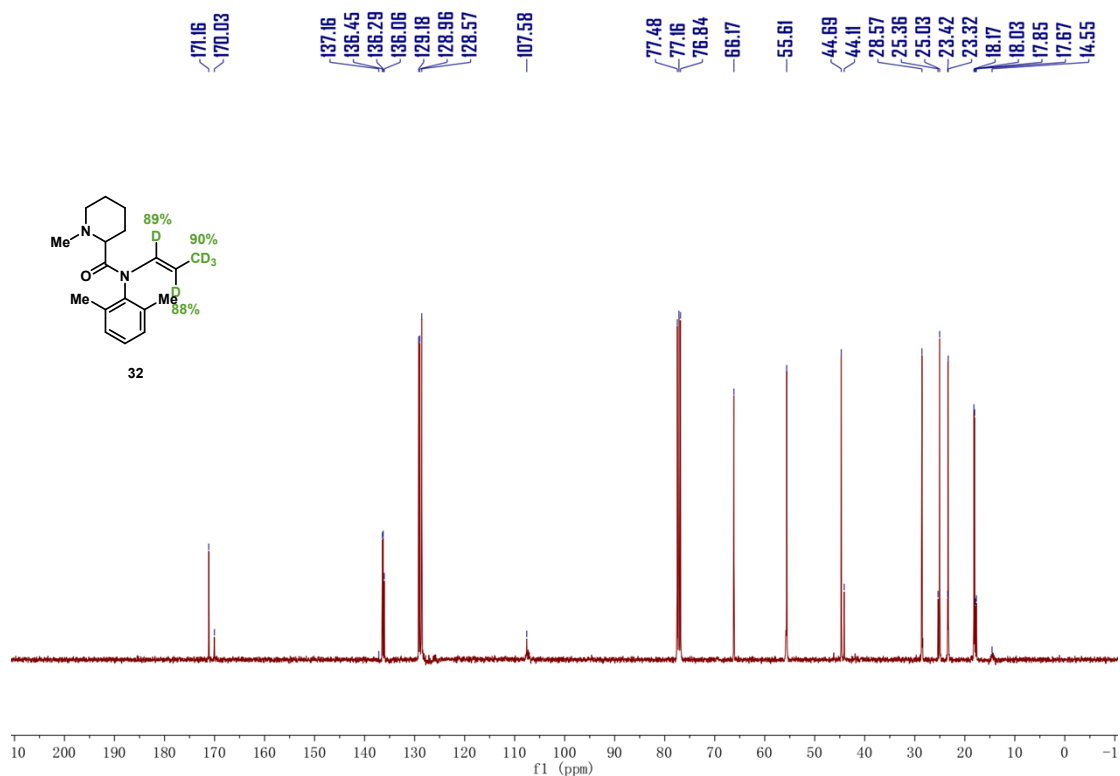

**$^1\text{H}$  NMR (400 MHz,  $\text{CDCl}_3$ ):**

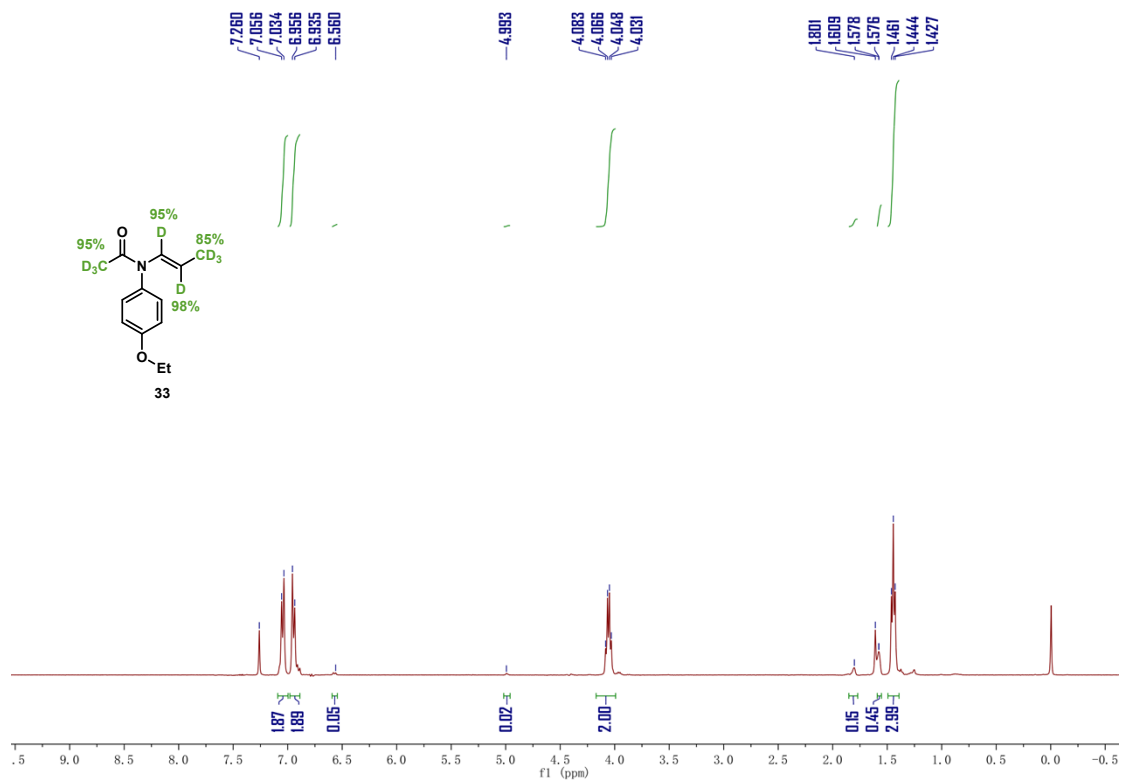

**$^{13}\text{C}$  NMR (101 MHz,  $\text{CDCl}_3$ ):**

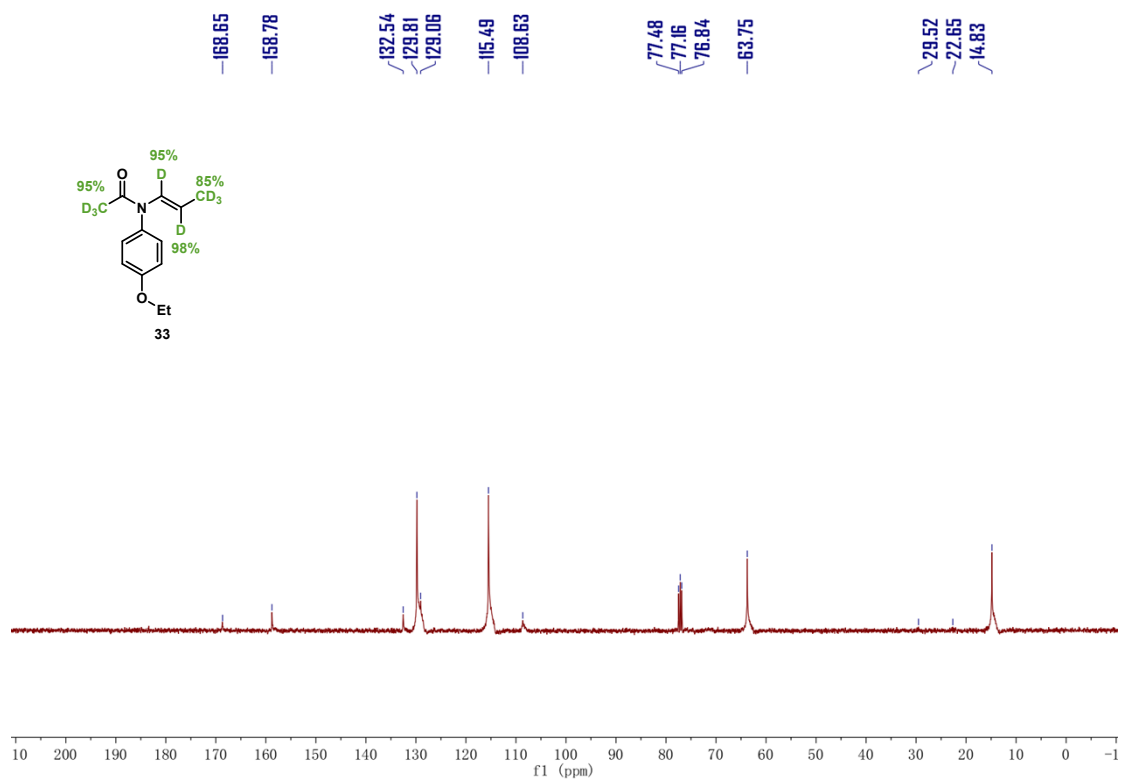

**$^1\text{H}$  NMR (400 MHz,  $\text{CDCl}_3$ ):**

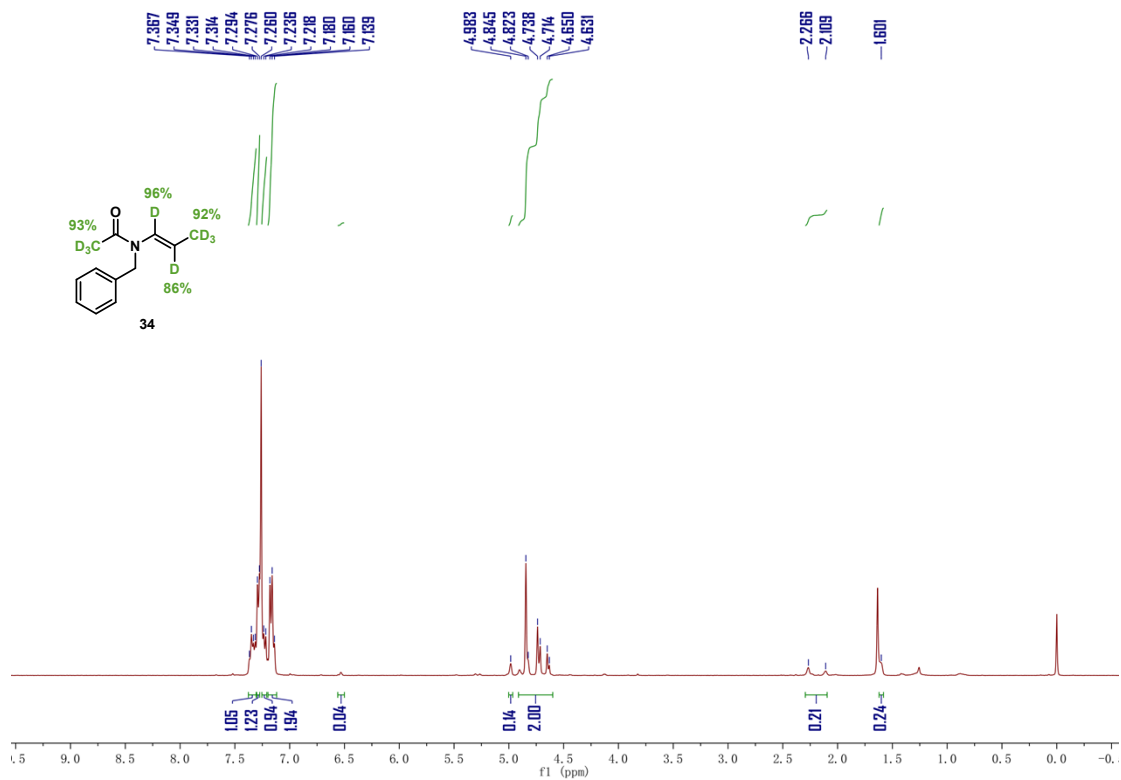

**$^{13}\text{C}$  NMR (101 MHz,  $\text{CDCl}_3$ ):**

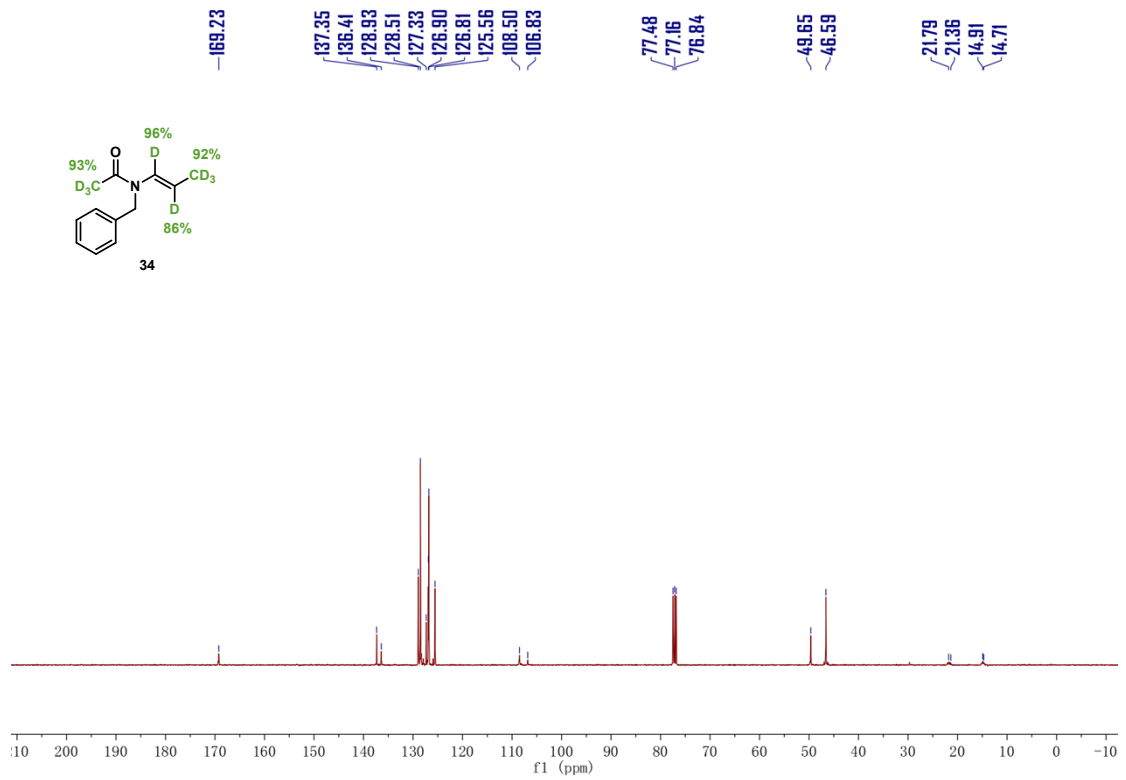

**$^1\text{H}$  NMR (400 MHz,  $\text{CDCl}_3$ ):**

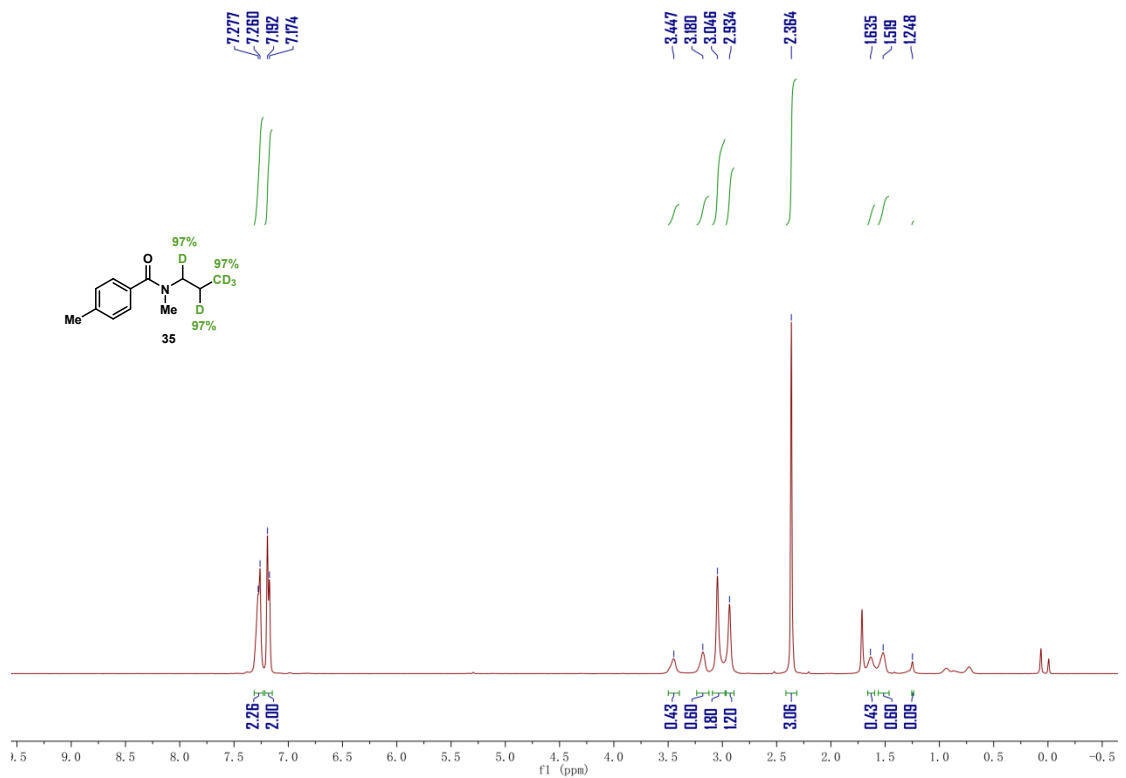



**<sup>13</sup>C NMR (101 MHz, CDCl<sub>3</sub>):**

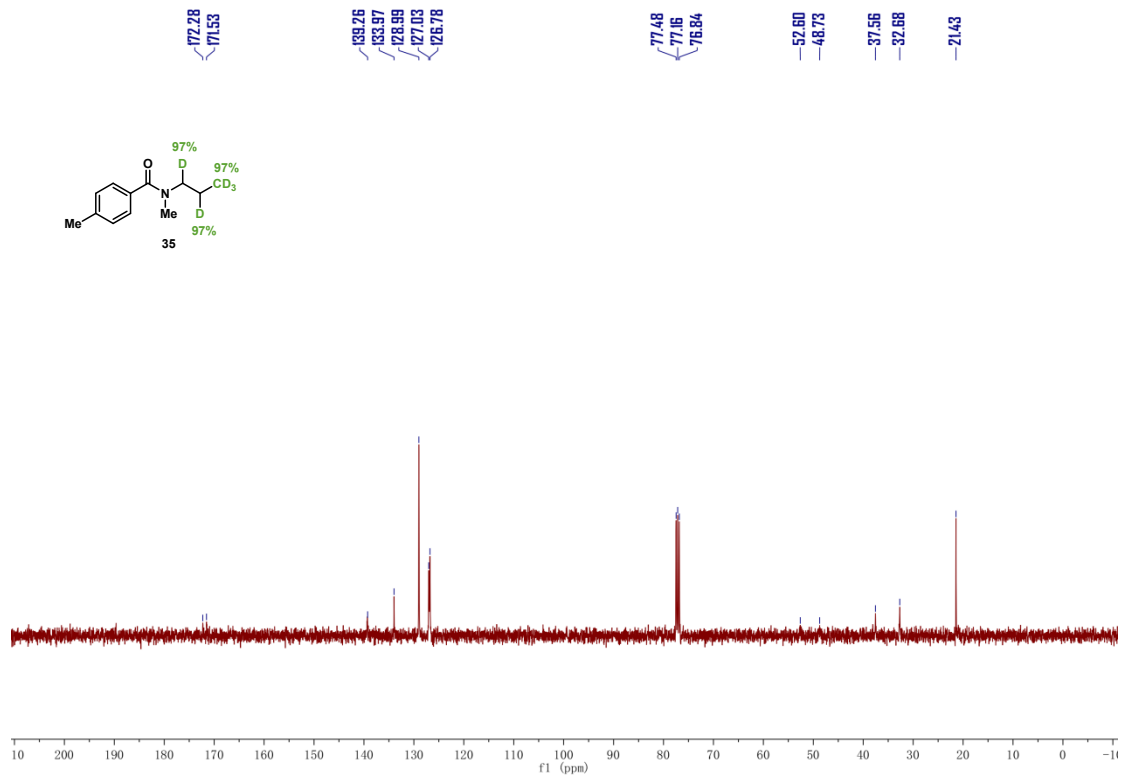

**<sup>1</sup>H NMR (400 MHz, CDCl<sub>3</sub>):**

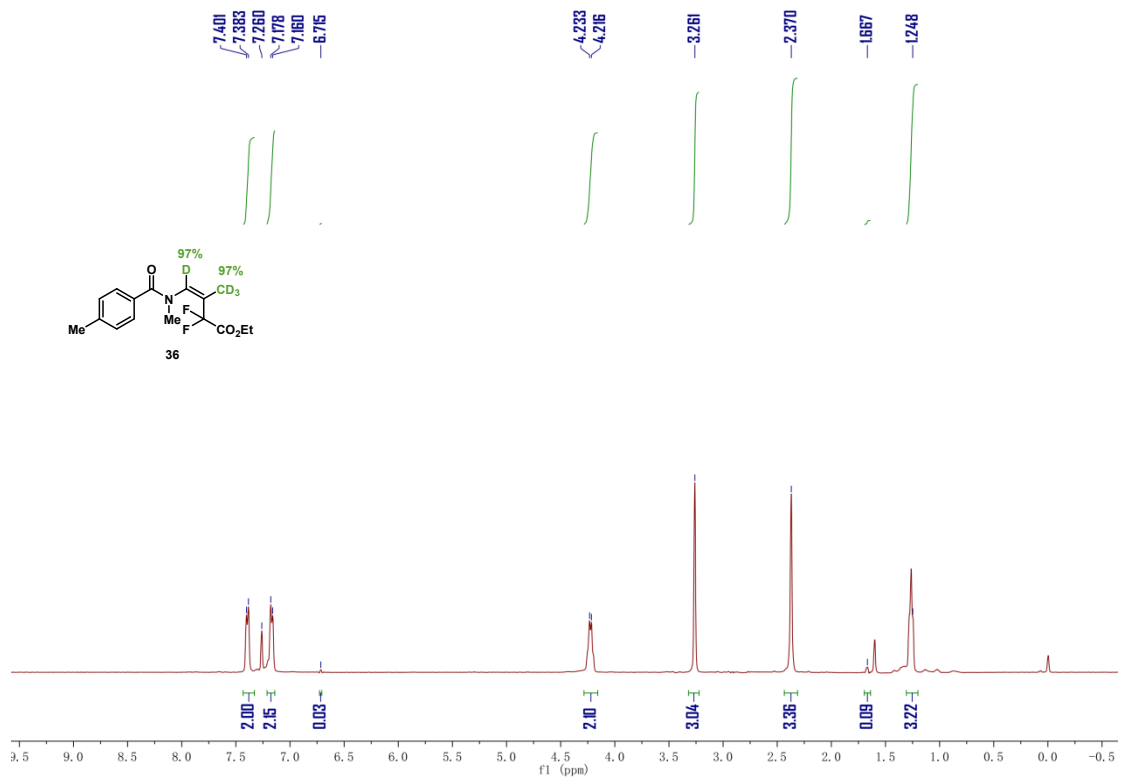

**<sup>13</sup>C NMR (101 MHz, CDCl<sub>3</sub>):**

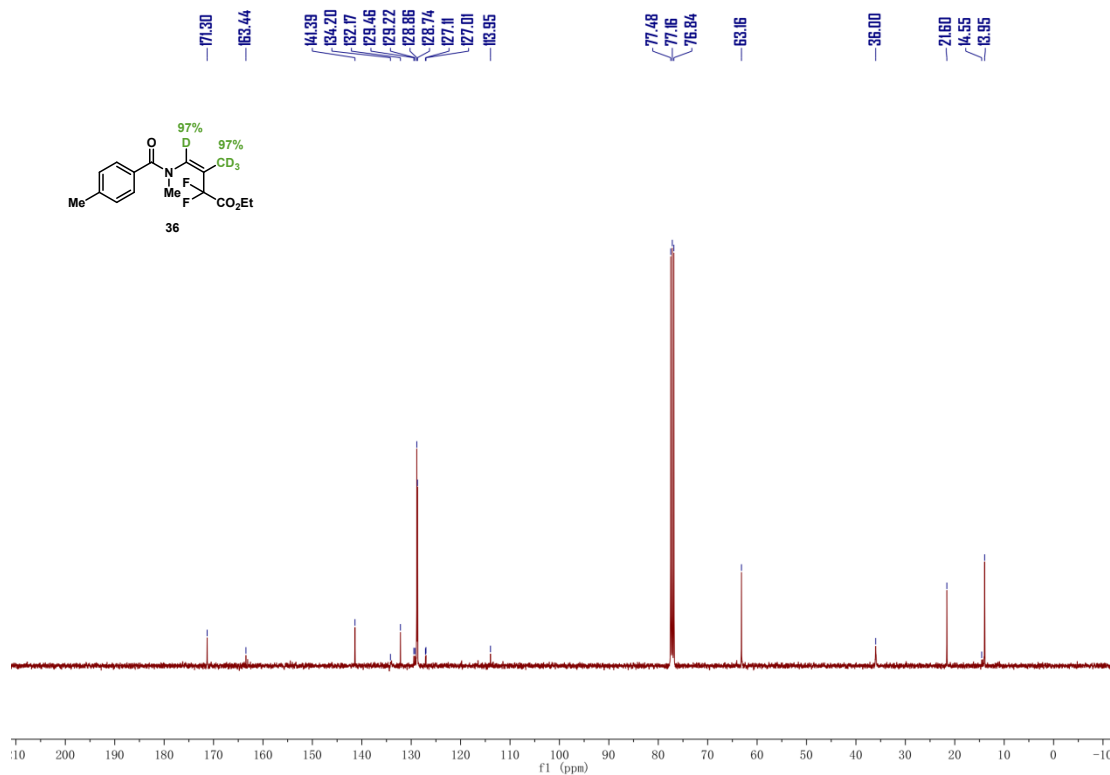

**<sup>1</sup>H NMR (400 MHz, CDCl<sub>3</sub>):**

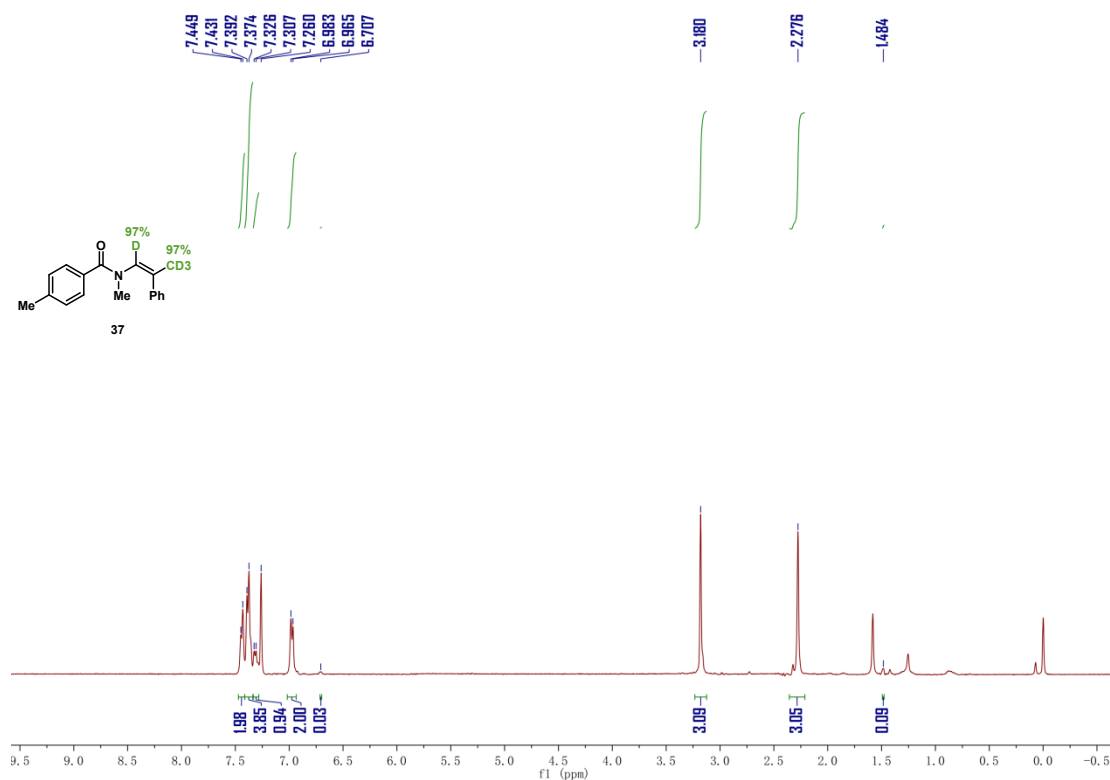

### $^{13}\text{C}$ NMR (101 MHz, $\text{CDCl}_3$ ):

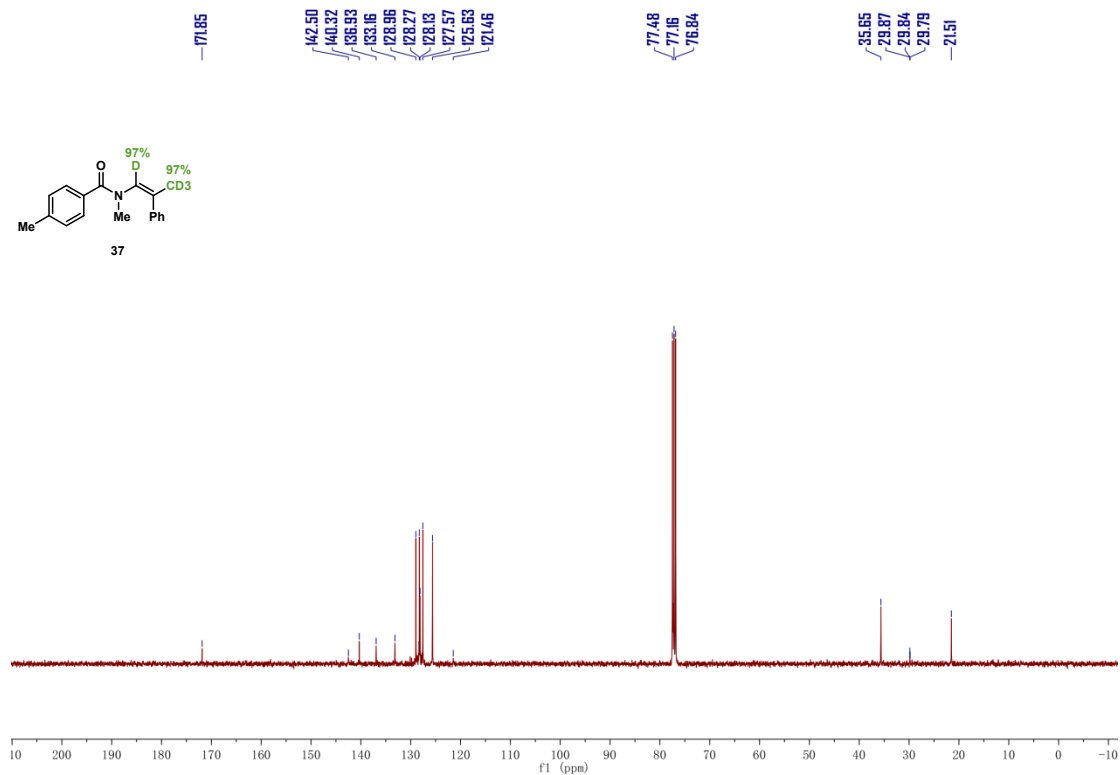

### $^1\text{H}$ NMR (400 MHz, $\text{CDCl}_3$ ):

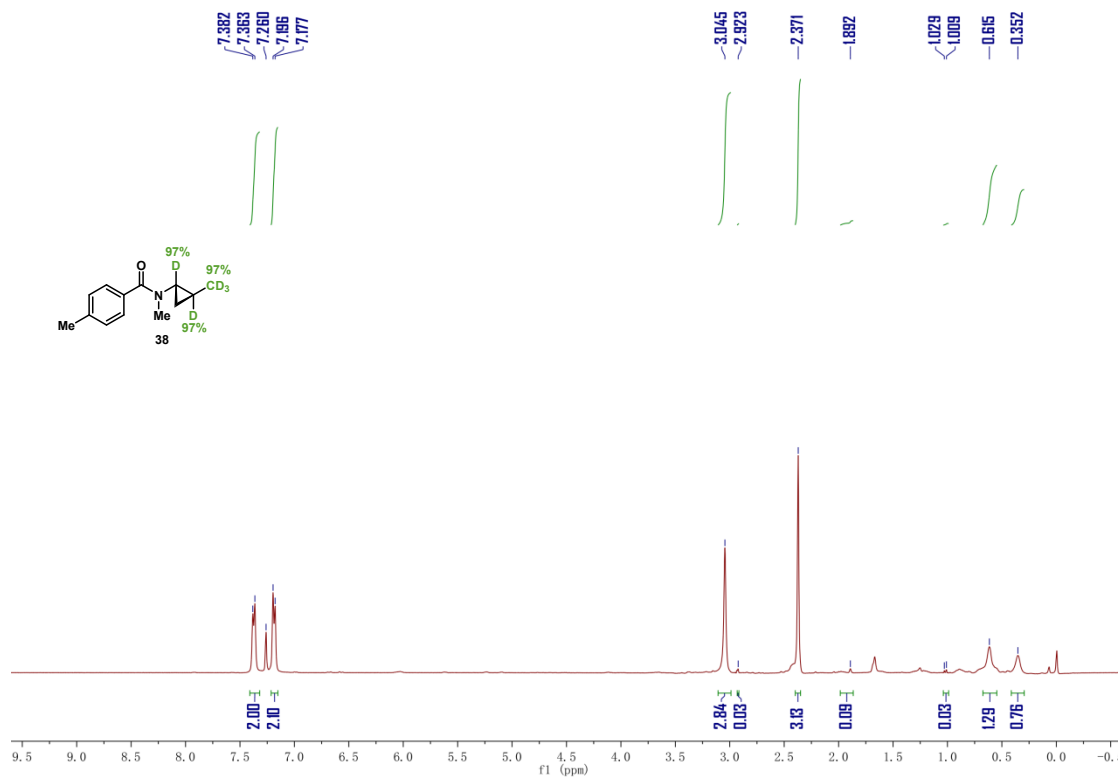

**$^{13}\text{C}$  NMR (101 MHz,  $\text{CDCl}_3$ ):**

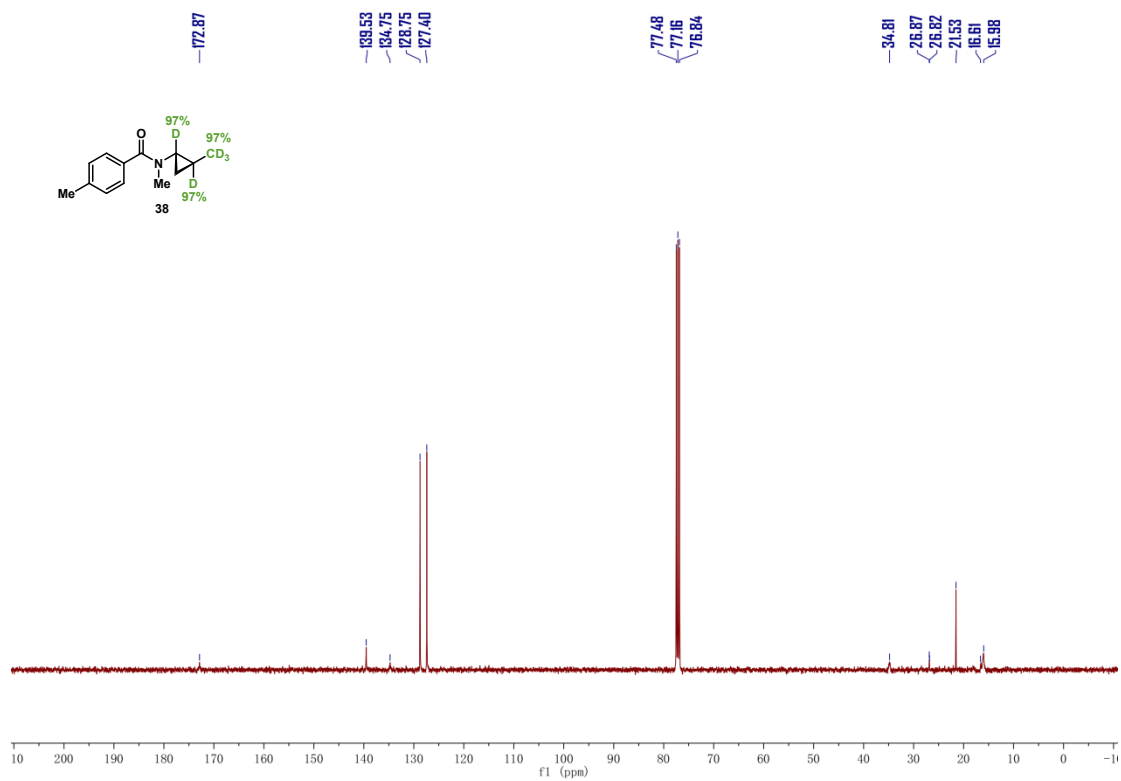

**$^1\text{H}$  NMR (400 MHz,  $\text{CDCl}_3$ ):**

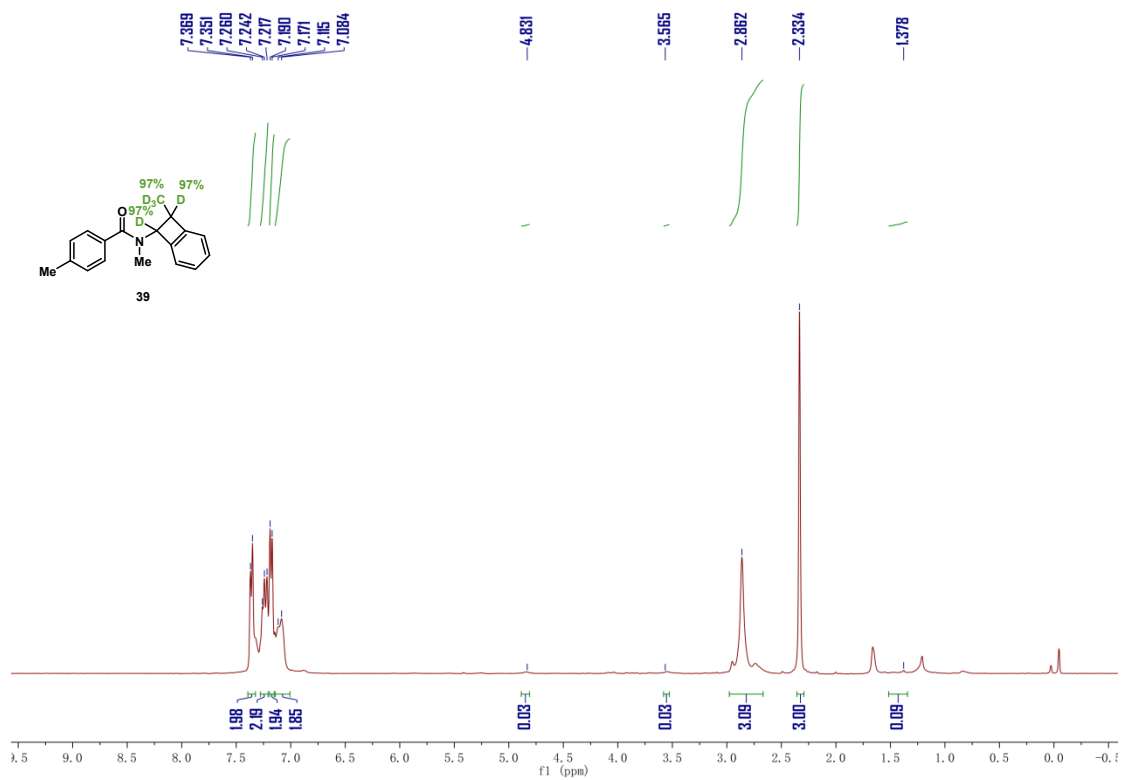

**<sup>13</sup>C NMR (101 MHz, CDCl<sub>3</sub>):**

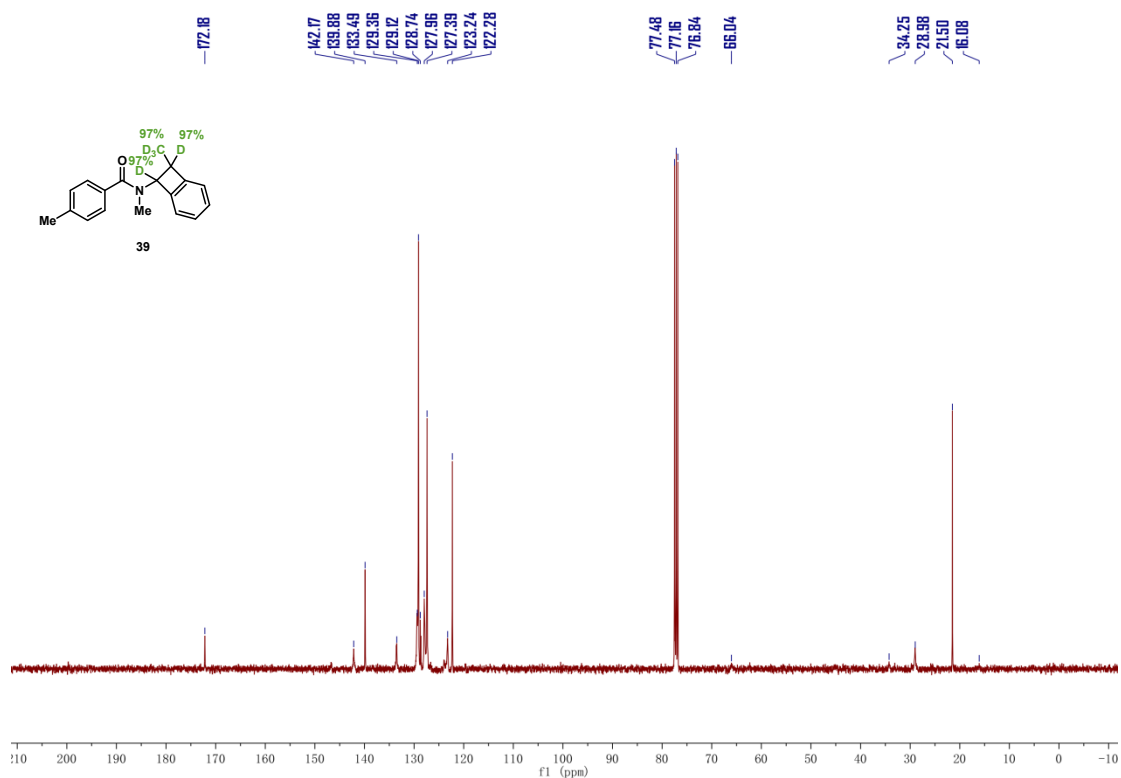

**<sup>1</sup>H NMR (400 MHz, CDCl<sub>3</sub>):**

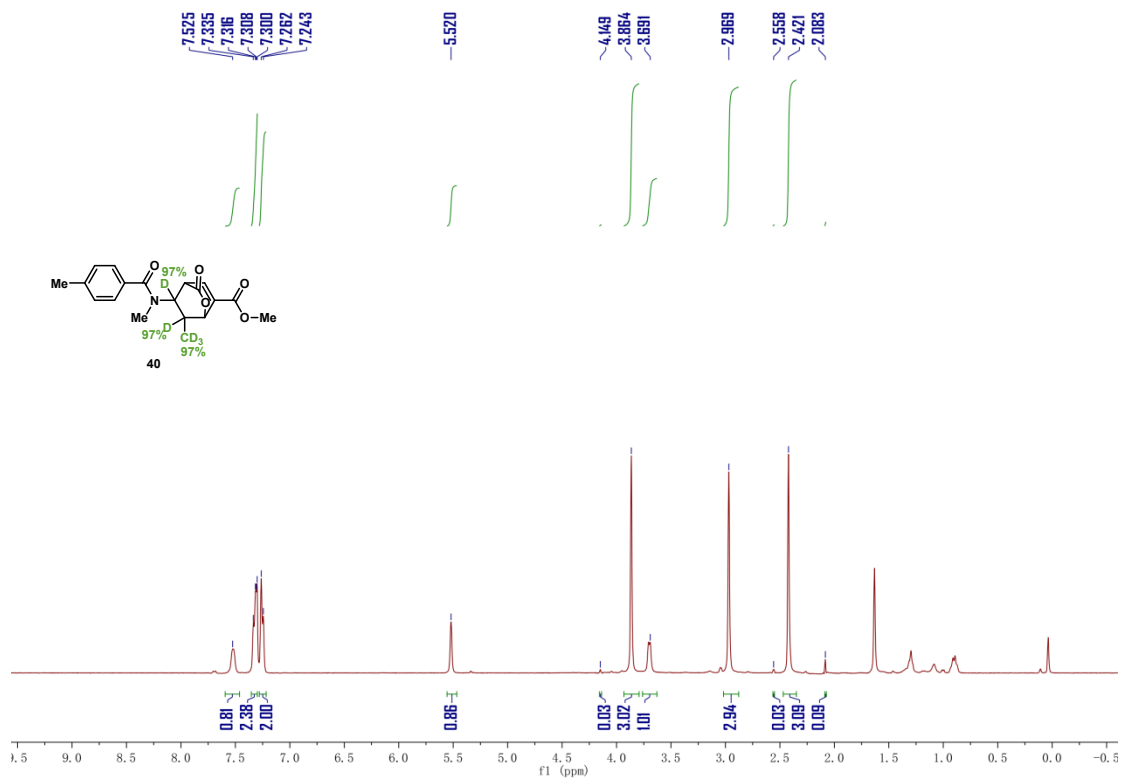

### $^{13}\text{C}$ NMR (101 MHz, $\text{CDCl}_3$ ):

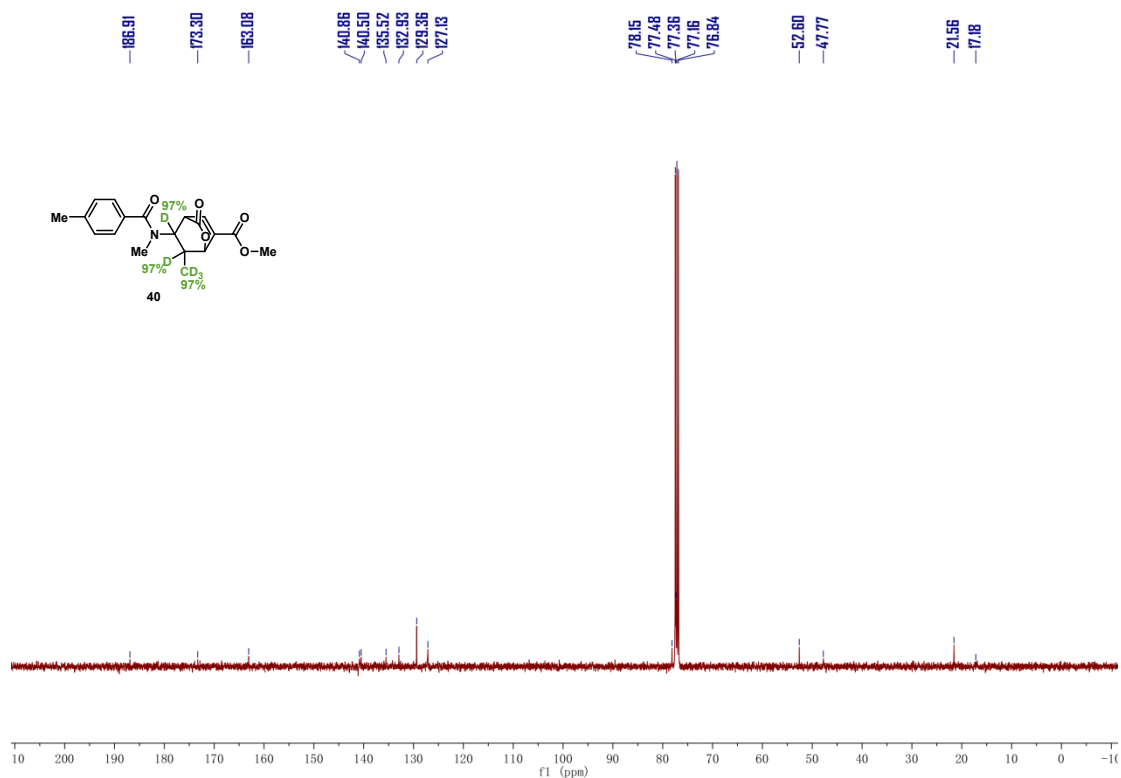

### $^1\text{H}$ NMR (400 MHz, $\text{CDCl}_3$ ):

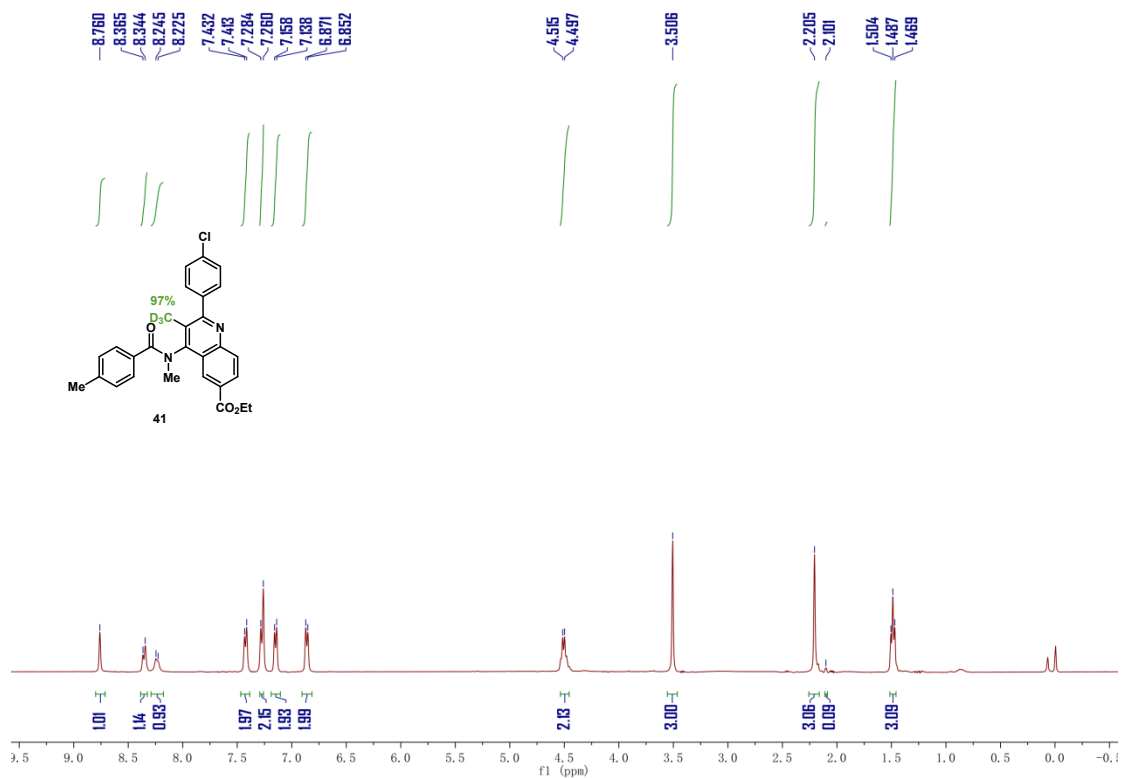

**<sup>13</sup>C NMR (101 MHz, CDCl<sub>3</sub>):**

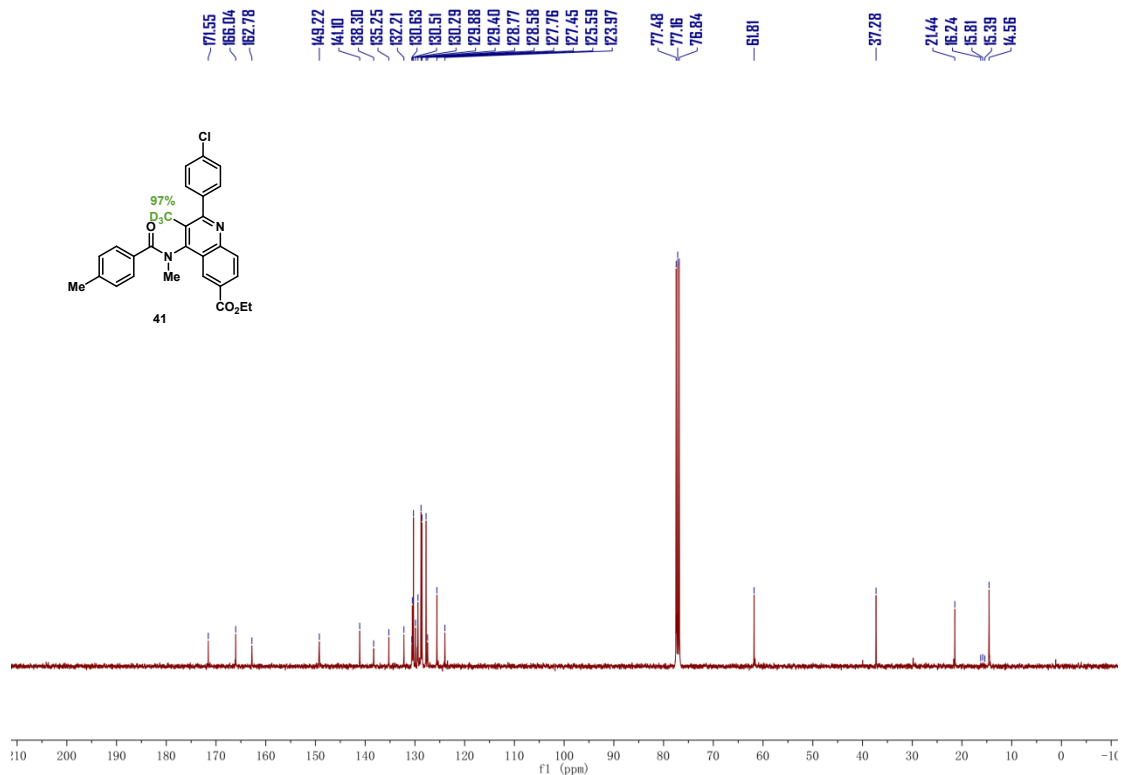

**<sup>1</sup>H NMR (400 MHz, CDCl<sub>3</sub>):**

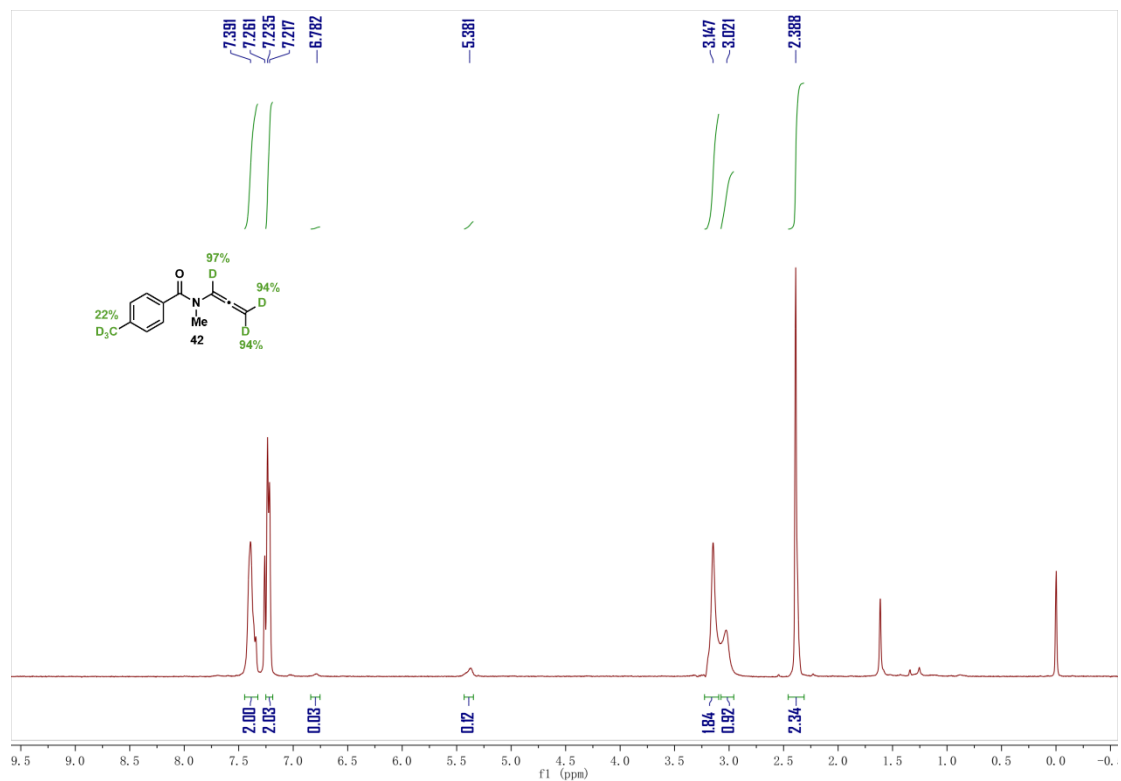

**<sup>13</sup>C NMR (101 MHz, CDCl<sub>3</sub>):**

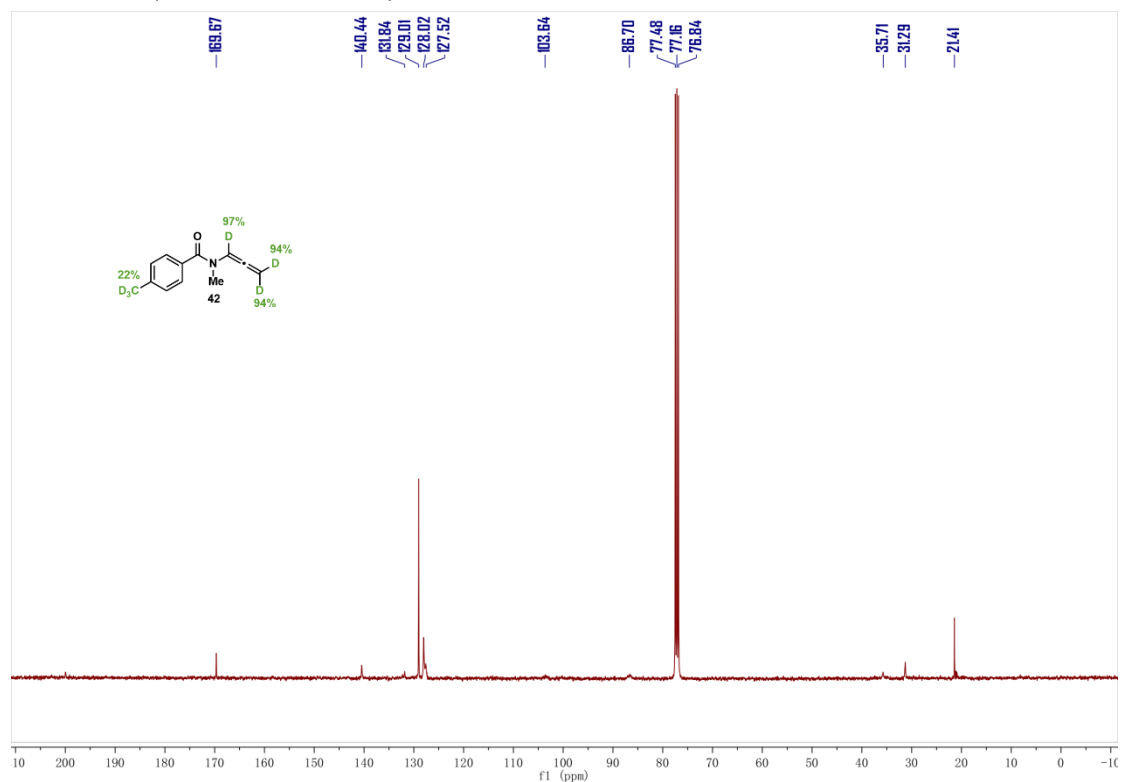

**<sup>1</sup>H NMR (400 MHz, CDCl<sub>3</sub>):**

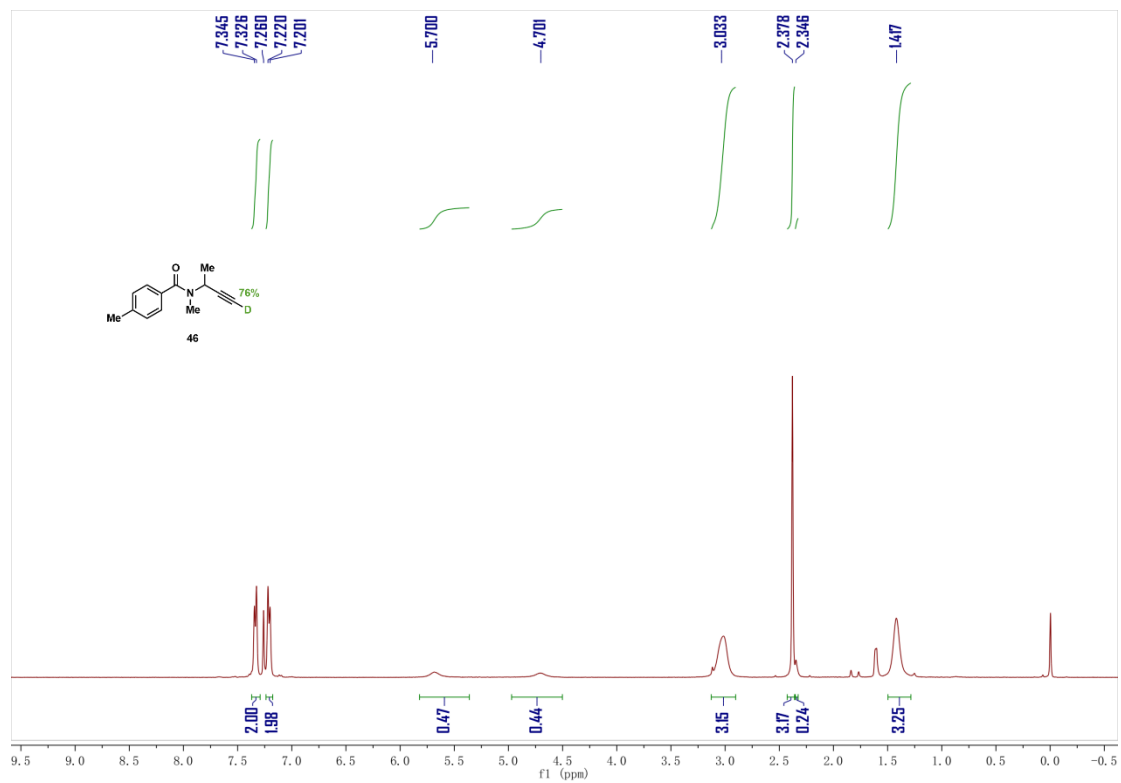



**<sup>13</sup>C NMR (101 MHz, CDCl<sub>3</sub>):**

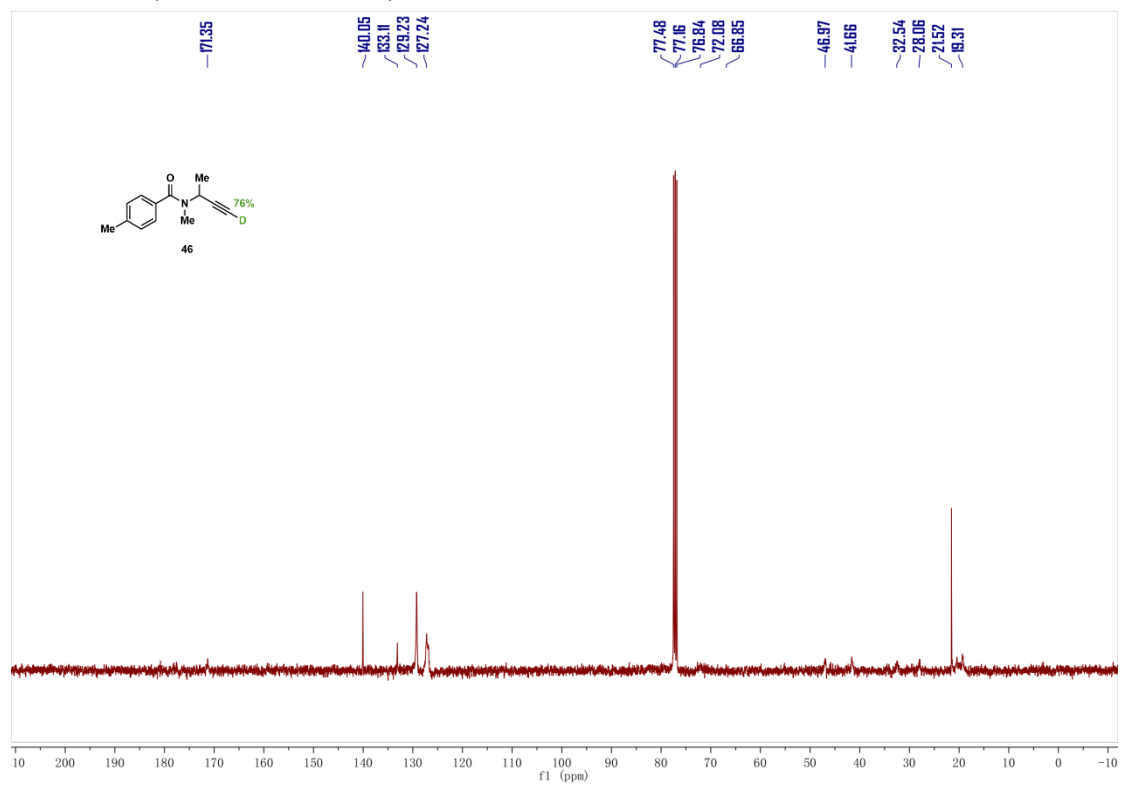

Supplement: d4gc03790a1.pdf [file d4gc03790a1.pdf]
